# Supplementary material for: Understanding the role of ring strain in β-alkyl migration at Mg and Zn centres
Source: PubMed Central journal article supplement (PMC9906642; doi:10.1039/d2sc06288g), 2023-01-10
Supplement: SC-014-D2SC06288G-s002.pdf [file SC-014-D2SC06288G-s002.pdf]

# Understanding the Role of Ring Strain in $\beta$ -Alkyl Migration at Mg and Zn Centres

Joseph M. Parr,<sup>a</sup> Andreas Phanopoulos,<sup>a</sup> Aaranjah Vickneswaran,<sup>a</sup> Mark R Crimmin<sup>\*a</sup>

Corresponding author email: m.crimmin@imperial.ac.uk

<sup>a</sup>Molecular Sciences Research Hub, Department of Chemistry, Imperial College London, 82 Wood Lane, White City, Shepherds Bush, London, W12 0BZ, UK.

## Contents

|                                                         |            |
|---------------------------------------------------------|------------|
| <b>1. General Experimental</b> .....                    | <b>1</b>   |
| <b>2. Synthetic Procedures</b> .....                    | <b>2</b>   |
| <i>Synthesis of 4c</i> .....                            | 2          |
| <i>Synthesis of 4d</i> .....                            | 3          |
| <i>Synthesis of 5b</i> .....                            | 7          |
| <i>Synthesis of 5c</i> .....                            | 11         |
| <i>Synthesis of 5d</i> .....                            | 15         |
| <i>Synthesis of 6b</i> .....                            | 19         |
| <i>Synthesis of 7a</i> .....                            | 25         |
| <i>Synthesis of 8b</i> .....                            | 30         |
| <i>Synthesis of 9a</i> .....                            | 34         |
| <i>Labelling reaction</i> .....                         | 38         |
| <i>Catalytic hydrosilylation with magnesium</i> .....   | 39         |
| <i>Hydrosilylation with zinc</i> .....                  | 41         |
| <i>Kinetics</i> .....                                   | 43         |
| <b>3. X-ray Crystallography</b> .....                   | <b>45</b>  |
| <i>Crystal structure of 5b</i> .....                    | 46         |
| <i>Crystal structure of 5c</i> .....                    | 46         |
| <i>Crystal structure of 7a</i> .....                    | 48         |
| <i>Crystal structure of 9a</i> .....                    | 49         |
| <b>4. Computational Calculations</b> .....              | <b>50</b>  |
| <i>Computed structures, energies and analysis</i> ..... | 51         |
| <i>NBO analysis of select TS-2</i> .....                | 61         |
| <i>Activation Strain Analysis</i> .....                 | 62         |
| <i>Non-covalent interactions (NCI) plots</i> .....      | 81         |
| <i>Computational coordinates</i> .....                  | 83         |
| <b>5. References</b> .....                              | <b>110</b> |

## 1. General Experimental

All manipulations were carried out under standard Schlenk-line or glovebox techniques under an inert atmosphere of nitrogen. A MBraun Labmaster glovebox was employed operating at concentrations of H<sub>2</sub>O and O<sub>2</sub> below 0.1 ppm. Glassware was dried for 12 hours at 120 °C prior to use. C<sub>6</sub>D<sub>6</sub> was freeze-pump thaw degassed thrice and stored over molecular sieves for twelve hours before use. All other solvents were dried using a Grubbs type solvent purification system. <sup>1</sup>H, COSY, TOCSY, <sup>13</sup>C{<sup>1</sup>H}, DEPT-135, HSQC and HMBC NMR experiments were run within J-Young Tap NMR tubes on Bruker Avance 400 or 500 MHz spectrometers. Spectra were referenced to known residual protio solvent peaks. NMR analysis was conducted in MestReNova and TopSpin with baseline and phase corrections applied to spectra. Chemical shift values are reported in ppm and coupling constants *J* in Hz. Microanalysis (CHN) were performed under inert atmosphere by Elemental Microanalysis Ltd. Infrared spectra were obtained on a Cary630 spectrometer (placed with in an MBraun glovebox) from crystalline solids or toluene thin-films on an ATR cell. **1**,<sup>1</sup> **2**,<sup>2</sup> and **3a**<sup>3</sup> were prepared as described previously. All other reagents were purchased from commercial vendors and used without further purification.

## 2. Synthetic Procedures

### Synthesis of **4c**

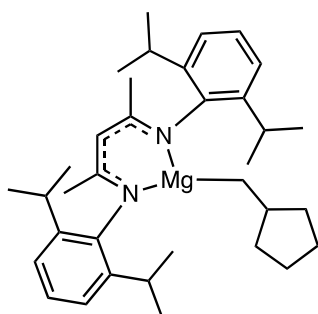

In a N<sub>2</sub> filled glovebox, a suspension of **1** (20 mg, 0.045 mmol) in C<sub>6</sub>D<sub>6</sub> (0.8 mL) was added to a J-Young NMR tube. Methylidene cyclopentane (**3c**) (4.8 μL, 3.8 mg, 0.045 mmol) was added via micropipette and the NMR tube sealed. The resulting colourless solution was heated to 100 °C for 16 hours, or until the complete consumption of **1** was observed *via* <sup>1</sup>H NMR spectroscopy. The J-Young NMR tube was returned to the glovebox, the solution diluted with toluene (0.5 mL) and decanted into a scintillation vial. The volatiles were removed in *vacuo*, leaving an off-white crystalline solid. The solid was dissolved in n-pentane (2 x 0.5 mL) and filtered. The volatiles were removed in *vacuo*, leaving **4c** as an analytically pure white solid. Yield: 21.4 mg, 0.041 mmol, 90 %. NMR spectra match those reported in the literature.<sup>4</sup>

<sup>1</sup>H NMR (400 MHz, C<sub>6</sub>D<sub>6</sub>) δ: -0.07 (d, <sup>3</sup>J<sub>H-H</sub> = 6.8 Hz, 2H, Mg-CH<sub>2</sub>), 0.66 (m, 2H, ((CH<sub>2</sub>)<sub>2</sub>(CH<sub>2</sub>)<sub>2</sub>CH), 1.15 (d, <sup>3</sup>J<sub>H-H</sub> = 6.9 Hz, 12H, CH(CH<sub>3</sub>)<sub>2</sub>), 1.29 (d, <sup>3</sup>J<sub>H-H</sub> = 6.9 Hz, 12H, CH(CH<sub>3</sub>)<sub>2</sub>), 1.44 (m, 4H, ((CH<sub>2</sub>)<sub>2</sub>(CH<sub>2</sub>)<sub>2</sub>CH), 1.68 (s, 6H, NC(CH<sub>3</sub>)), 1.92 (m, 1H, MgCH<sub>2</sub>CH), 3.16 (sept, <sup>3</sup>J<sub>H-H</sub> = 6.8 Hz, 4H, CH(CH<sub>3</sub>)<sub>2</sub>), 4.94 (s, 1H, (CH<sub>3</sub>)C(CH)C(CH<sub>3</sub>)), 7.08-7.13 (m, 6H, Ar-H).

<sup>13</sup>C NMR (101 MHz, C<sub>6</sub>D<sub>6</sub>) δ: 13.7 (Mg-CH<sub>2</sub>), 23.6 (NCCH<sub>3</sub>), 23.7 (NCCH<sub>3</sub>), 24.6 (2x C(CH<sub>3</sub>)<sub>2</sub>), 25.8 (MgCH<sub>2</sub>CH(CH<sub>2</sub>)<sub>2</sub>(CH<sub>2</sub>)<sub>2</sub>), 28.7 (2x C(CH<sub>3</sub>)<sub>2</sub>), 40.4 (MgCH<sub>2</sub>CH(CH<sub>2</sub>)<sub>2</sub>), 41.3 (MgCH<sub>2</sub>CH), 95.4 ((CH<sub>3</sub>)C(CH)C(CH<sub>3</sub>)), 124.1 (*meta*-Ar-CH), 126.0 (*para*-Ar-CH), 141.9 (*ortho*-Ar-C), 144.1 (*ipso*-Ar-C), 169.3 (NC(CH<sub>3</sub>)).

## Synthesis of **4d**

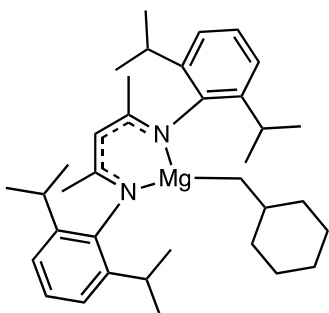

In a N<sub>2</sub> filled glovebox, a suspension of **1** (25 mg, 0.0565 mmol) in C<sub>6</sub>D<sub>6</sub> (0.8 mL) was added to a J-Young NMR tube. Methylidene cyclohexane (**3d**) (6.5 μL, 5.4 mg, 0.0565 mmol) was added via micropipette and the NMR tube sealed. The resulting colourless solution was heated to 100 °C for 24 hours, or until the complete consumption of **1** was observed *via* <sup>1</sup>H NMR spectroscopy. The J-Young NMR tube was returned to the glovebox, the solution diluted with toluene (0.5 mL) and decanted into a scintillation vial. The volatiles were removed in *vacuo*, leaving an off-white crystalline solid. The solid was dissolved in n-pentane (2 x 0.5 mL) and filtered. The volatiles were removed in *vacuo*, leaving **4d** as an analytically pure white solid. Yield: 30 mg, 0.046 mmol, 83 %.

<sup>1</sup>H NMR (400 MHz, C<sub>6</sub>D<sub>6</sub>) δ: -0.18 (d, <sup>3</sup>J<sub>H-H</sub> = 6.3 Hz, 2H, Mg-CH<sub>2</sub>), 0.54 (m, 2H, CH(CH<sub>2</sub>)<sub>2</sub>(CH<sub>2</sub>)<sub>2</sub>CH<sub>2</sub>), 0.93-1.13 (m, 4H, mixture of cyclohexyl CH<sub>2</sub> groups), 1.16 (d, <sup>3</sup>J<sub>H-H</sub> = 6.8 Hz, 12H, CH(CH<sub>3</sub>)<sub>2</sub>), 1.24-1.28 (m, 2H, mixture of cyclohexyl CH<sub>2</sub> groups and Mg-CH<sub>2</sub>CH), 1.29 (d, <sup>3</sup>J<sub>H-H</sub> = 6.8 Hz, 12H, CH(CH<sub>3</sub>)<sub>2</sub>), 1.53-1.61 (m, 3H, mixture of cyclohexyl CH<sub>2</sub> groups), 1.68 (s, 6H, NC(CH<sub>3</sub>)), 3.16 (sept, <sup>3</sup>J<sub>H-H</sub> = 6.8 Hz, 4H, CH(CH<sub>3</sub>)<sub>2</sub>), 4.94 (s, 1H, (CH<sub>3</sub>)C(CH)C(CH<sub>3</sub>)), 7.08-7.14 (m, 6H, Ar-H).

<sup>13</sup>C NMR (101 MHz, C<sub>6</sub>D<sub>6</sub>) δ: 17.7 (Mg-CH<sub>2</sub>), 23.7 (NCCH<sub>3</sub>), 24.6 (CH(CH<sub>3</sub>)<sub>2</sub>), 26.8 (CH(CH<sub>2</sub>)<sub>2</sub>), 27.8 (CH(CH<sub>2</sub>)<sub>2</sub>(CH<sub>2</sub>)<sub>2</sub>), 28.7 (CH(CH<sub>3</sub>)<sub>2</sub>), 38.1 (Mg-CH<sub>2</sub>CH), 41.2 (CH(CH<sub>2</sub>)<sub>2</sub>(CH<sub>2</sub>)<sub>2</sub>(CH<sub>2</sub>)), 95.3 ((CH)C(CH<sub>3</sub>)<sub>2</sub>), 124.1 (*para*-Ar-CH), 126.0 (*meta*-Ar-CH), 141.9 (*ortho*-Ar-C), 144.0 (*ipso*-Ar-C), 169.3 (NC(CH<sub>3</sub>)).

FT-IR (cm<sup>-1</sup>): 3053, 3021, 2955, 2908, 2864, 2841, 1520, 1457, 1431, 1389, 1357, 1310, 1257, 1251, 1230, 1174, 1100, 1082, 1052, 1025, 962, 933, 900, 880, 866, 850, 840, 795, 772, 759, 749, 727, 702, 693, 642, 629, 595, 552, 542, 524, 508.

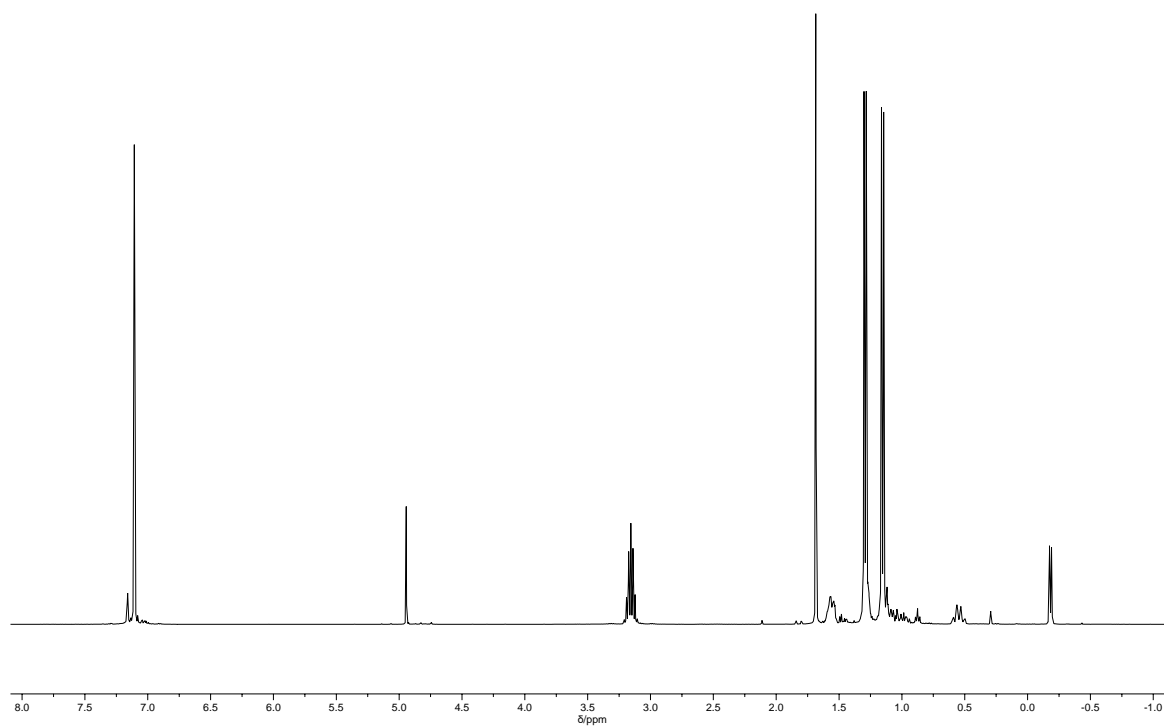

Figure S1.  $^1\text{H}$  NMR spectrum of **4d**

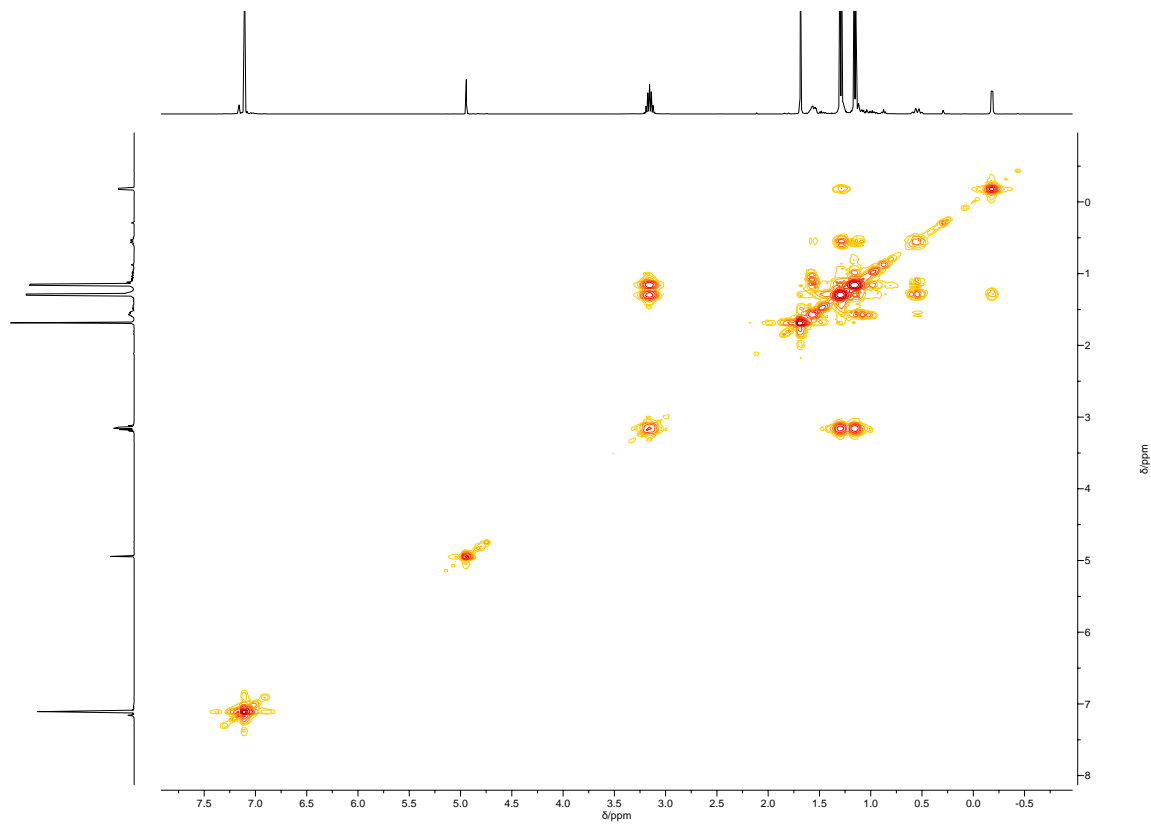

Figure S2.  $^1\text{H}$  COSY NMR spectrum of **4d**

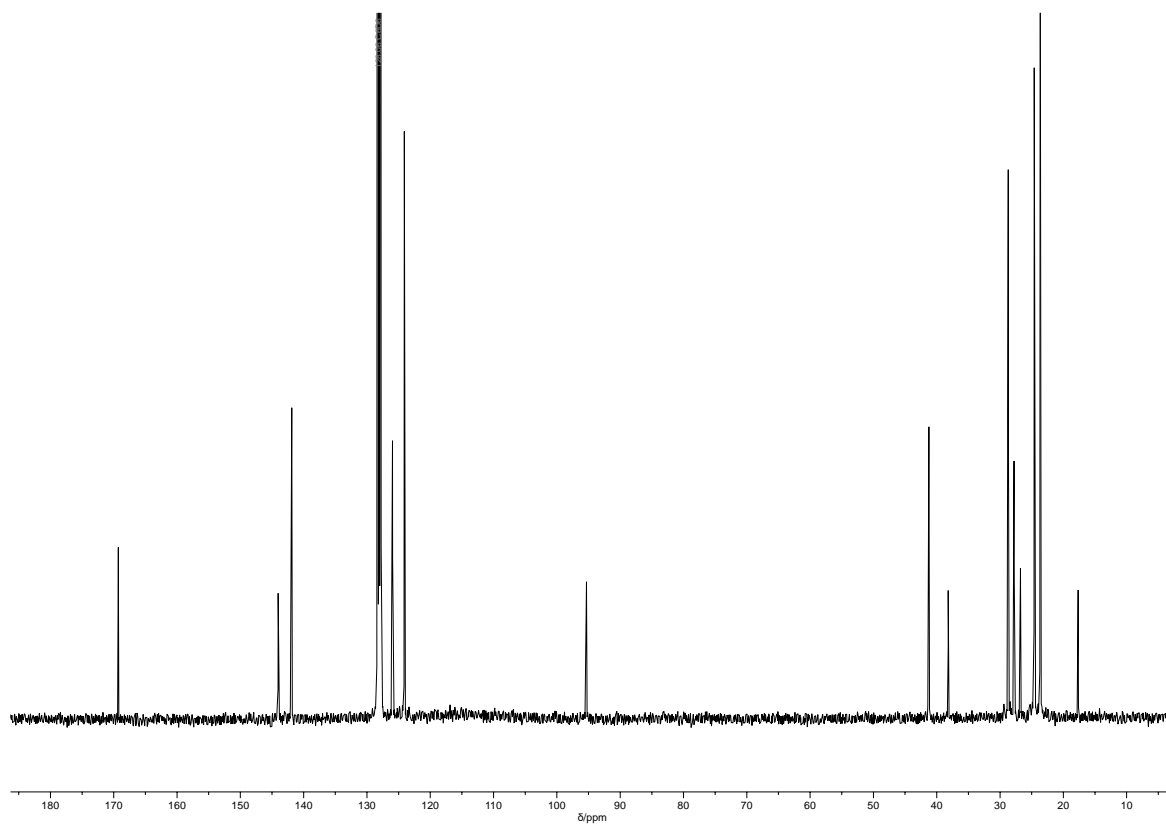

Figure S3.  $^{13}\text{C}\{^1\text{H}\}$  NMR spectrum of 4d

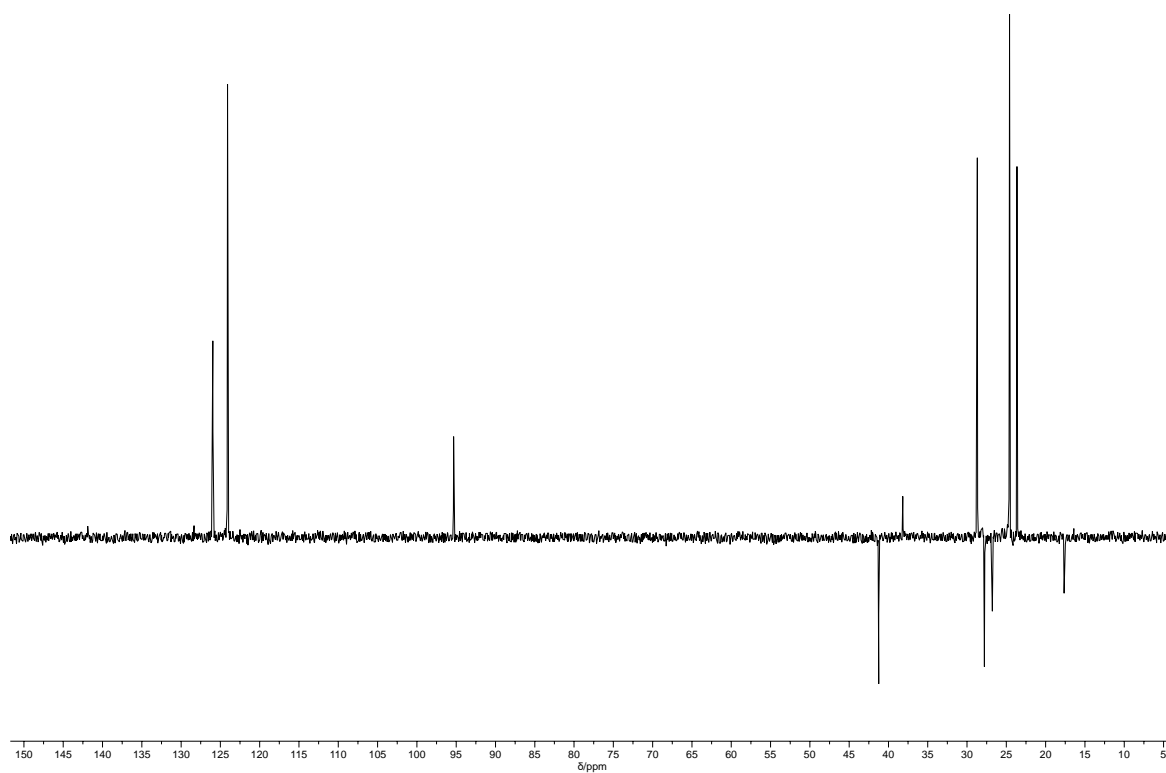

Figure S4.  $^{13}\text{C}\{^1\text{H}\}$  DEPT-135 NMR spectrum of 4d

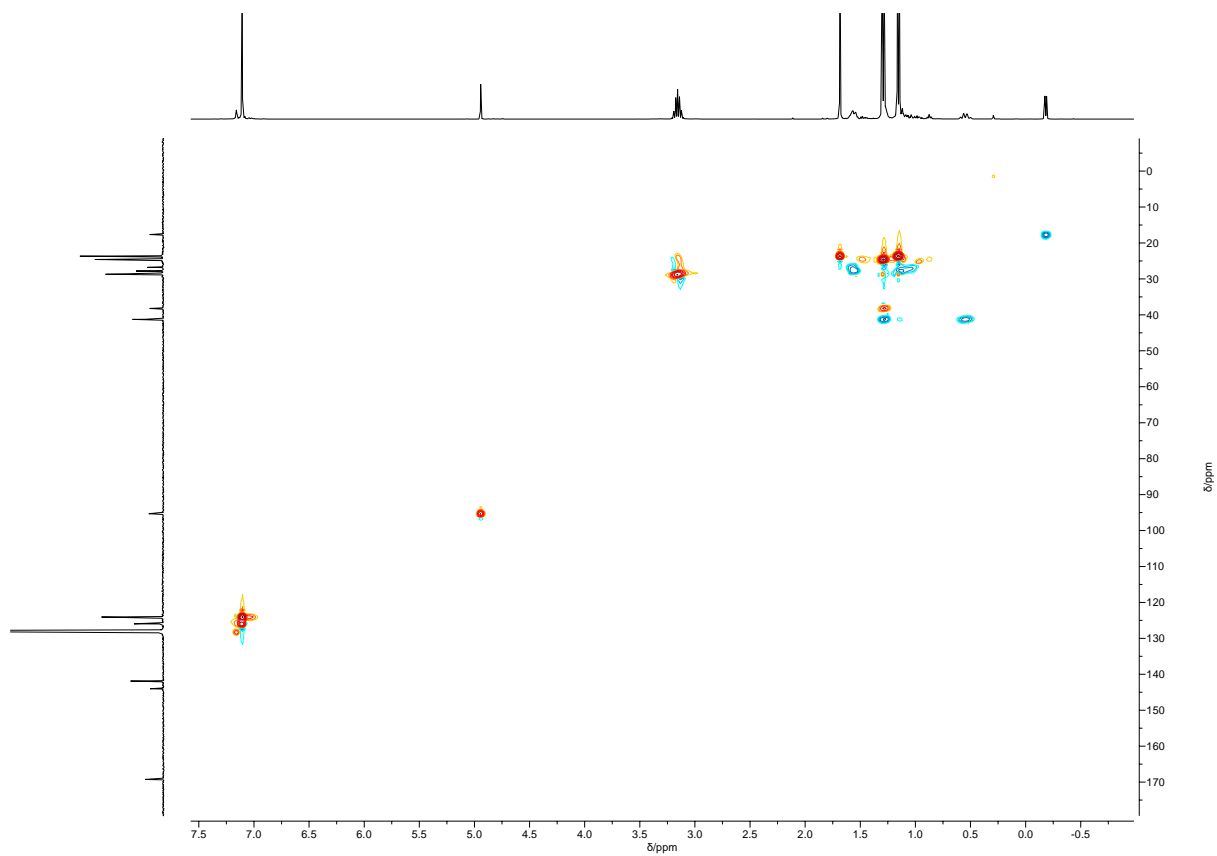

Figure S5.  $^1\text{H}$ - $^{13}\text{C}$  HSQC NMR spectrum of **4d**

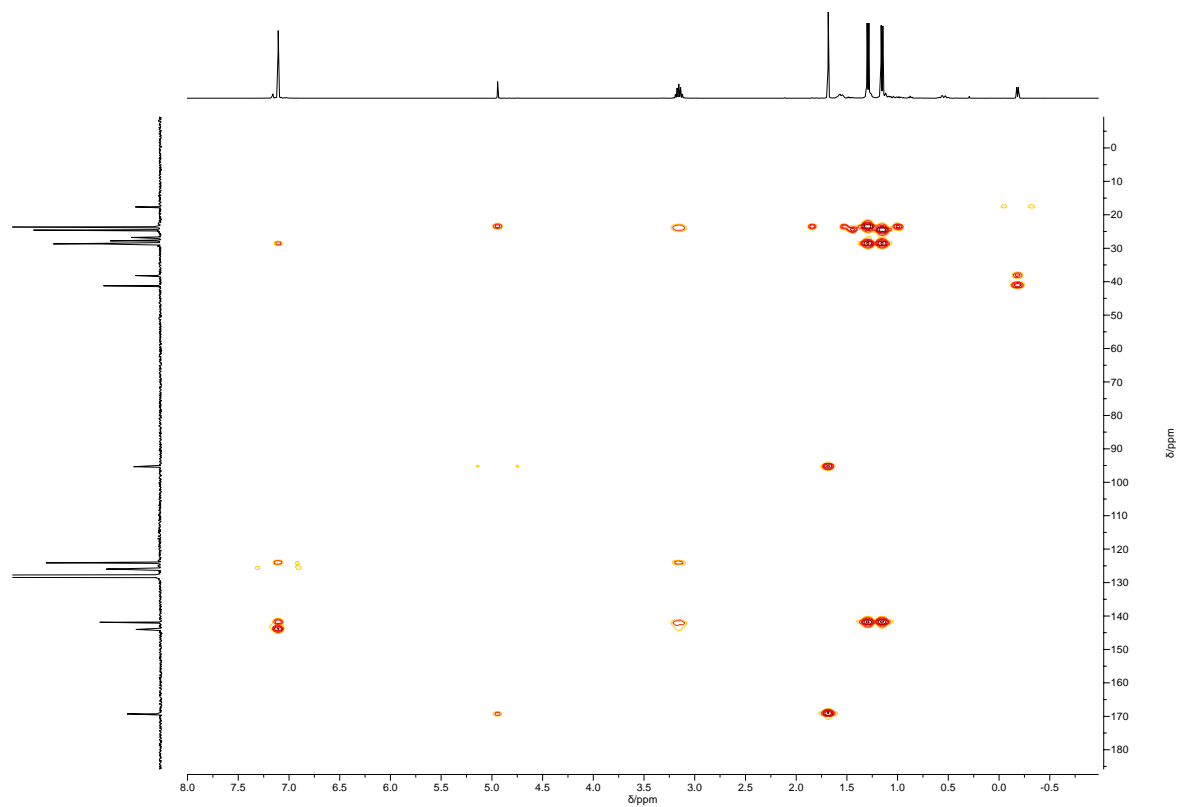

Figure S6.  $^1\text{H}$ - $^{13}\text{C}$  HMBC NMR spectrum of **4d**

## Synthesis of **5b**

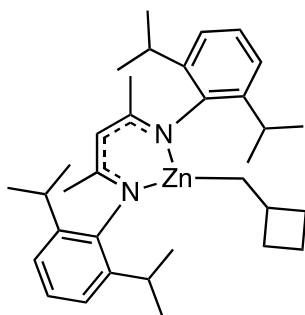

In a N<sub>2</sub> filled glovebox, a suspension of **2** (20 mg, 0.041 mmol) in C<sub>6</sub>D<sub>6</sub> (0.6 mL) was added to a J-Young NMR tube. Methylidene cyclobutane (**3b**) (4.6 μL, 3.4 mg, 0.050 mmol) was added via micropipette and the NMR tube sealed. The resulting colourless solution was heated to 100 °C for 39 hours, or until the complete consumption of **2** was observed *via* <sup>1</sup>H NMR spectroscopy. The J-Young NMR tube was returned to the glovebox, the solution diluted with toluene (0.5 mL) and decanted into a scintillation

vial. The volatiles were removed in *vacuo*, leaving an off-white solid. The solid was dissolved in n-pentane (1 mL) and filtered. The volatiles were removed in *vacuo*, leaving **5b** as an analytically pure white solid. Yield: 17.9 mg, 0.032 mmol, 79 %.

<sup>1</sup>H NMR (400 MHz, C<sub>6</sub>D<sub>6</sub>) δ: 0.48 (d, <sup>3</sup>J<sub>H-H</sub> = 7.9 Hz, 2H, Zn-CH<sub>2</sub>), 1.16 (d, <sup>3</sup>J<sub>H-H</sub> = 7.1 Hz, 12H, CH(CH<sub>3</sub>)<sub>2</sub>), 1.17-1.24 (m, 2H, CHCH<sub>2</sub>CH<sub>2</sub>), 1.29 (d, <sup>3</sup>J<sub>H-H</sub> = 7.1 Hz, 12H, CH(CH<sub>3</sub>)<sub>2</sub>), 1.47-1.60 (m, 2H, CH(CH<sub>2</sub>)CH<sub>2</sub>), 1.61-1.68 (m, 2H, CHCH<sub>2</sub>CH<sub>2</sub>), 1.70 (s, 6H, NC(CH<sub>3</sub>)), 2.26 (pseudo-sept, 1H, <sup>3</sup>J<sub>H-H</sub> = 8.0 Hz, ZnCH<sub>2</sub>CH), 3.17 (sept, 4H, <sup>3</sup>J<sub>H-H</sub> = 7.1 Hz, CH(CH<sub>3</sub>)<sub>2</sub>), 4.99 (s, 1H, (CH<sub>3</sub>)C(CH)C(CH<sub>3</sub>)), 7.12 (m, 6H, Ar-H).

<sup>13</sup>C NMR (101 MHz, C<sub>6</sub>D<sub>6</sub>) δ: 17.1 (CHCH<sub>2</sub>CH<sub>2</sub>), 18.3 (Zn-CH<sub>2</sub>), 23.5 (NC(CH<sub>3</sub>)), 23.6 (CH(CH<sub>3</sub>)<sub>2</sub>), 24.37 (CH(CH<sub>3</sub>)<sub>2</sub>), 28.6 (CH(CH<sub>3</sub>)<sub>2</sub>), 34.1 (CHCH<sub>2</sub>CH<sub>2</sub>), 37.4 (ZnCH<sub>2</sub>CH), 95.5 ((CH<sub>3</sub>)C(CH)C(CH<sub>3</sub>)), 123.9 (*meta*-Ar-CH), 126.0 (*para*-Ar-CH), 141.6 (*ortho*-Ar-C), 145.1 (*ipso*-Ar-C), 167.5 (NC(CH<sub>3</sub>)).

FT-IR (cm<sup>-1</sup>): 3057, 3020, 2956, 2921, 2863, 1550, 1524, 1436, 1380, 1360, 1317, 1264, 1251, 1232, 1175, 1100, 1056, 1018, 936, 856, 793, 755, 718, 703, 657, 625, 569, 528, 431.

Anal. Calcd. (C<sub>34</sub>H<sub>50</sub>N<sub>2</sub>Zn): C, 73.96; H, 9.13; N, 5.07. Found: C, 73.60; H, 8.90; N, 4.95.



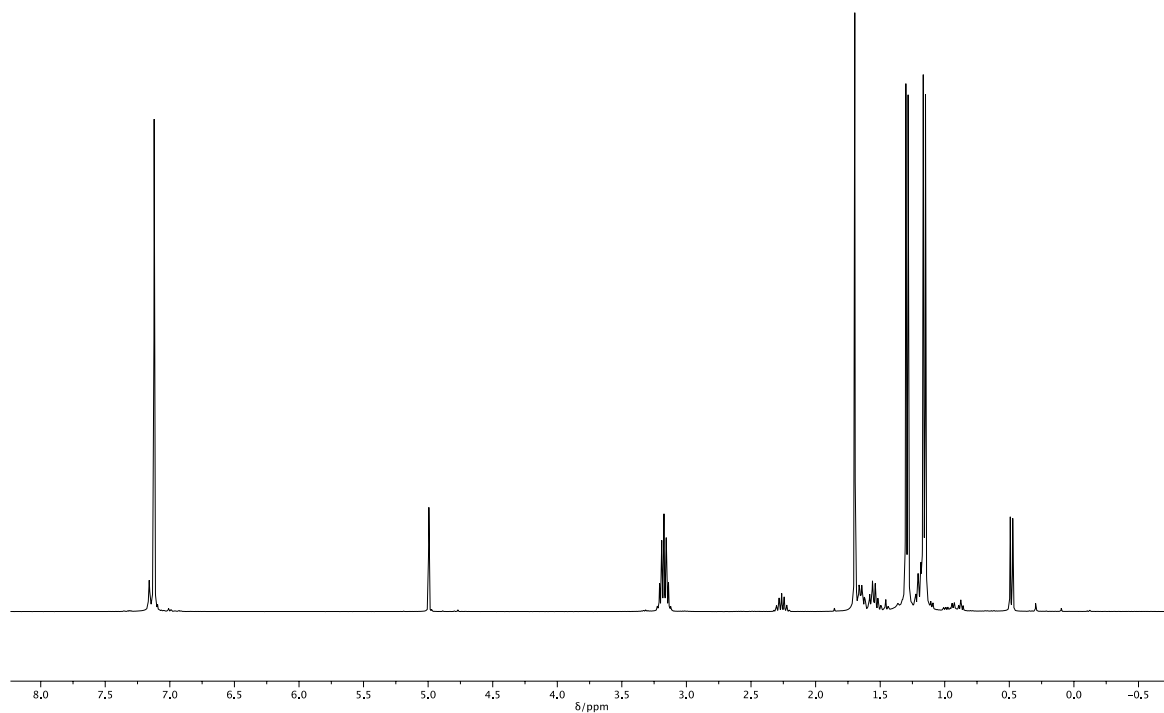

Figure S7.  $^1\text{H}$  NMR spectrum of **5b**

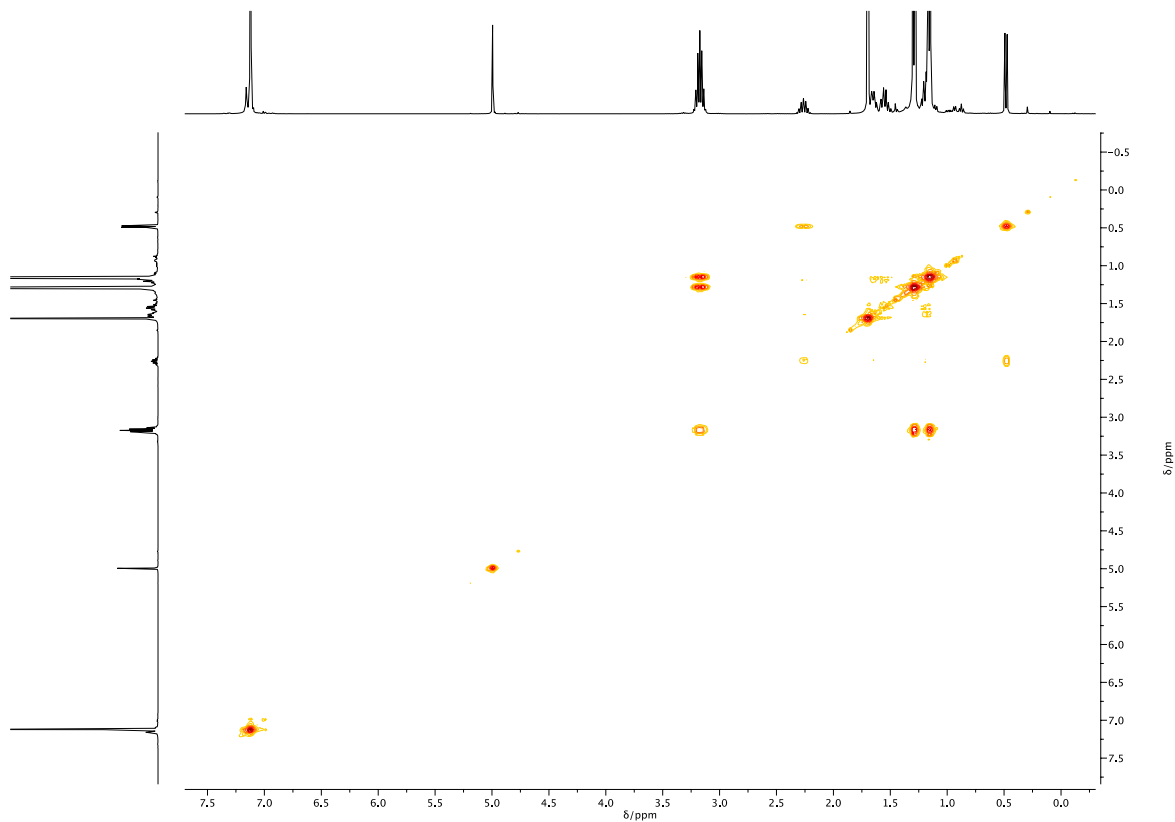

Figure S8.  $^1\text{H}$  COSY NMR spectrum of **5b**

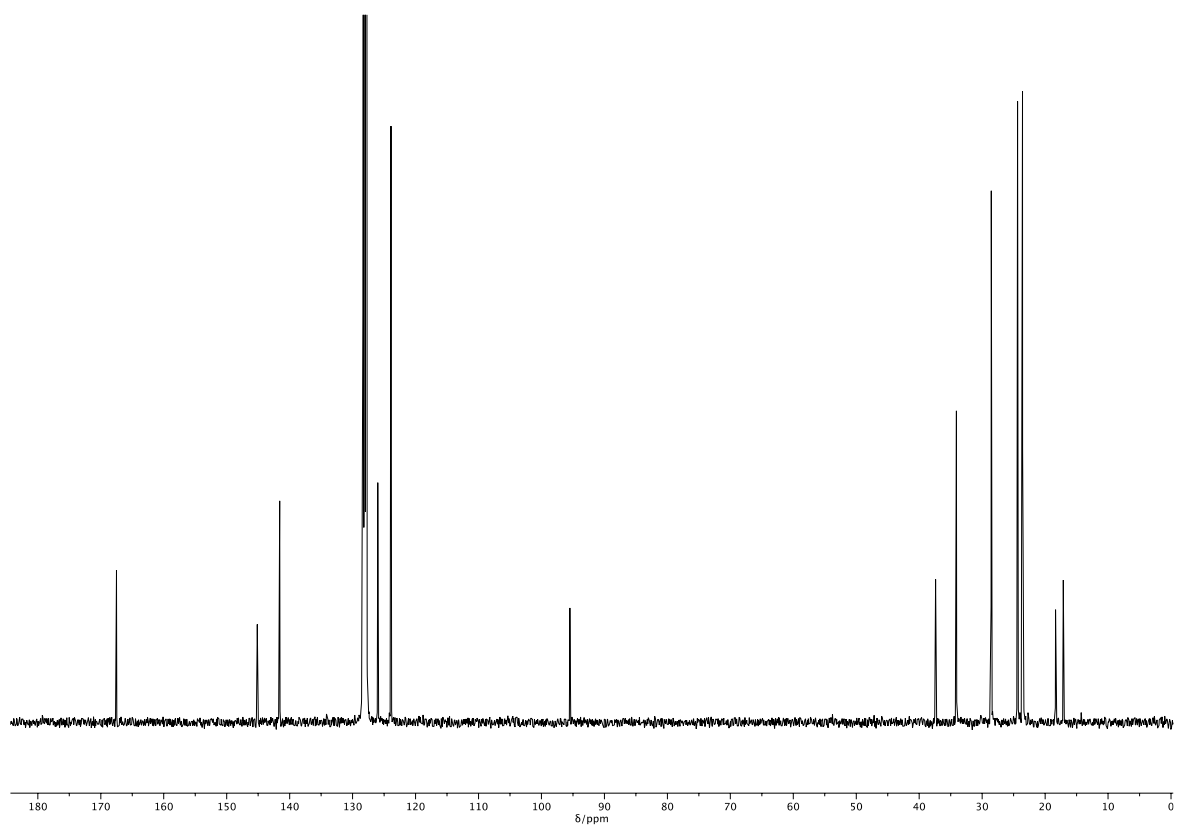

Figure S9.  $^{13}\text{C}\{^1\text{H}\}$  NMR spectrum of 5b

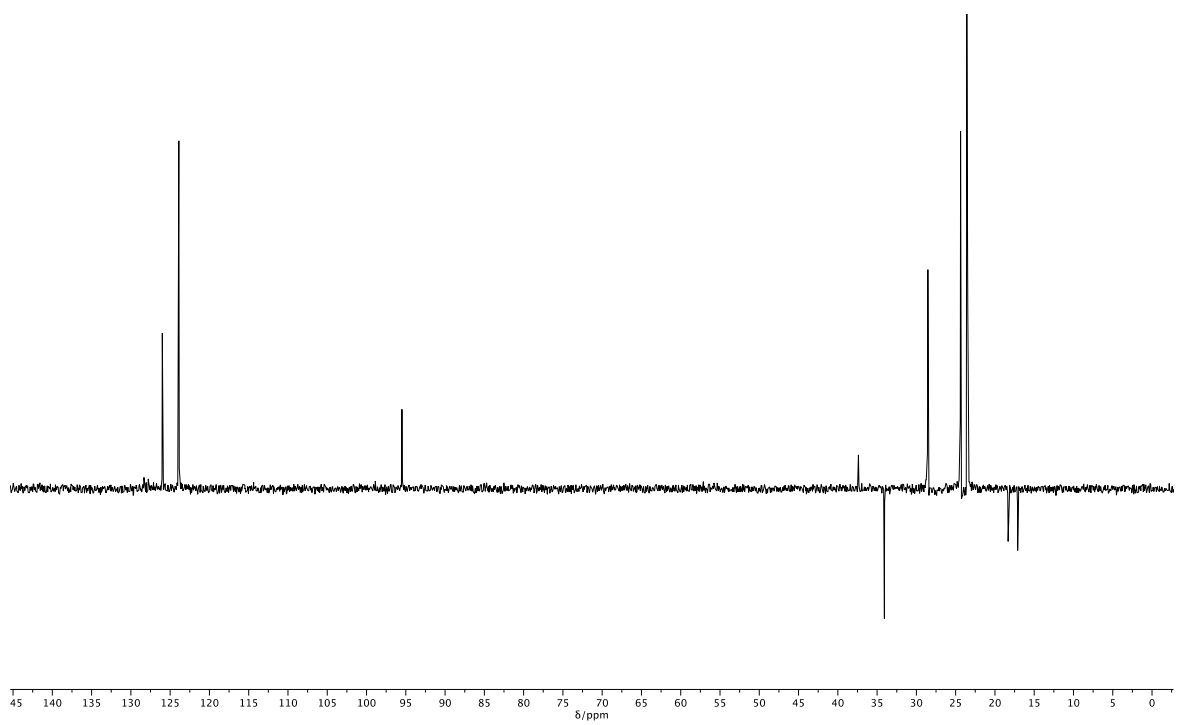

Figure S10.  $^{13}\text{C}\{^1\text{H}\}$  DEPT-135 NMR spectrum of 5b

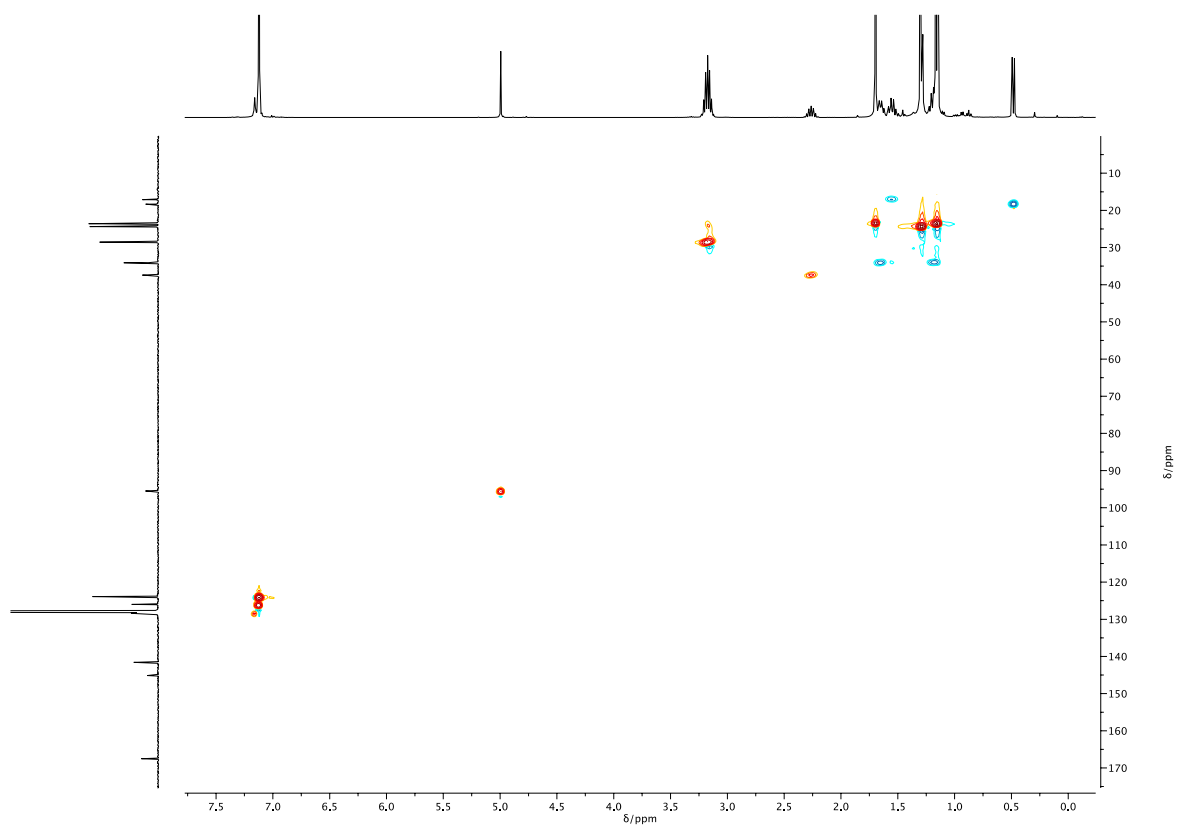

**Figure S11.**  $^1\text{H}$ - $^{13}\text{C}$  HSQC NMR spectrum of **5b**

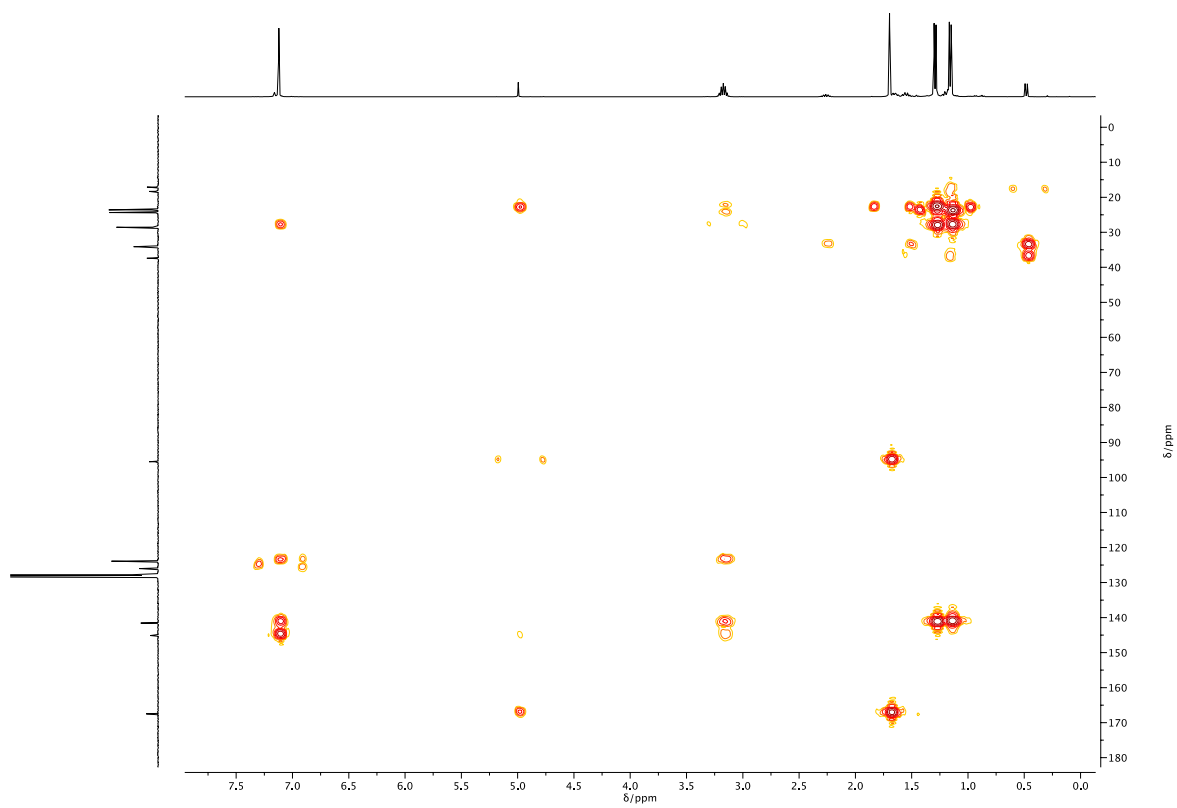

**Figure S12.**  $^1\text{H}$ - $^{13}\text{C}$  HMBC NMR spectrum of **5b**

## Synthesis of 5c

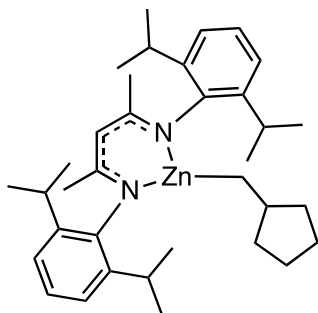

In a N<sub>2</sub> filled glovebox, a suspension of **2** (20 mg, 0.041 mmol) in C<sub>6</sub>D<sub>6</sub> (0.6 mL) was added to a J-Young NMR tube. Methylidene cyclopentane (**3c**) (5.6 μL, 4.4 mg, 0.053 mmol) was added via micropipette and the NMR tube sealed. The resulting colourless solution was heated to 100 °C for 39 hours, or until the complete consumption of **2** was observed *via* <sup>1</sup>H NMR spectroscopy. The J-Young NMR tube was returned to the glovebox, the solution diluted with toluene (0.5 mL) and decanted into a scintillation vial. The volatiles were removed in *vacuo*, leaving an off-white solid. The solid was dissolved in n-pentane (1 mL) and filtered. The volatiles were removed in *vacuo*, leaving **5c** as an analytically pure white solid. Yield: 17.7 mg, 0.031 mmol, 76%.

<sup>1</sup>H NMR (400 MHz, C<sub>6</sub>D<sub>6</sub>) δ: 0.40 (d, <sup>3</sup>J<sub>H-H</sub> = 7.1 Hz, 2H, Zn-CH<sub>2</sub>), 0.64-0.73 (m, 2H, (CH<sub>2</sub>)<sub>2</sub>(CH<sub>2</sub>)<sub>2</sub>CH), 1.16 (d, <sup>3</sup>J<sub>H-H</sub> = 7.3 Hz, 12H, CH(CH<sub>3</sub>)<sub>2</sub>), 1.20-1.27 (m, 2H, (CH<sub>2</sub>)<sub>2</sub>(CH<sub>2</sub>)<sub>2</sub>CH), 1.30 (d, <sup>3</sup>J<sub>H-H</sub> = 7.3 Hz, 12H, CH(CH<sub>3</sub>)<sub>2</sub>), 1.35-1.43 (m, 2H, (CH<sub>2</sub>)<sub>2</sub>(CH<sub>2</sub>)<sub>2</sub>CH), 1.46-1.57 (m, 2H, (CH<sub>2</sub>)<sub>2</sub>(CH<sub>2</sub>)<sub>2</sub>CH), 1.71 (s, 6H, NC(CH<sub>3</sub>)<sub>3</sub>), 1.75-1.85 (m, 1H, (CH<sub>2</sub>)<sub>2</sub>(CH<sub>2</sub>)<sub>2</sub>CH), 3.20 (sept, 4H, <sup>3</sup>J<sub>H-H</sub> = 7.3 Hz, CH(CH<sub>3</sub>)<sub>2</sub>), 5.01 (s, 1H, (CH<sub>3</sub>)C(CH)C(CH<sub>3</sub>)), 7.12 (m, 6H, Ar-H).

<sup>13</sup>C NMR (101 MHz, C<sub>6</sub>D<sub>6</sub>) δ: 15.6 (Zn-CH<sub>2</sub>), 23.5 (NC(CH<sub>3</sub>)<sub>3</sub>), 23.7 (CH(CH<sub>3</sub>)<sub>2</sub>), 24.3 (CH(CH<sub>3</sub>)<sub>2</sub>), 25.7 ((CH<sub>2</sub>)<sub>2</sub>(CH<sub>2</sub>)<sub>2</sub>CH), 28.6 (CH(CH<sub>3</sub>)<sub>2</sub>), 38.7 ((CH<sub>2</sub>)<sub>2</sub>(CH<sub>2</sub>)<sub>2</sub>CH), 40.5 ((CH<sub>2</sub>)<sub>2</sub>(CH<sub>2</sub>)<sub>2</sub>CH), 95.5 ((CH<sub>3</sub>)C(CH)C(CH<sub>3</sub>)), 123.9 (*meta*-Ar-CH), 126.0 (*para*-Ar-CH), 141.7 (*ortho*-Ar-C), 145.2 (*ipso*-Ar-C), 167.5 (NC(CH<sub>3</sub>)<sub>3</sub>).

FT-IR (cm<sup>-1</sup>): 3057, 3020, 2956, 2921, 2863, 1550, 1524, 1436, 1380, 1360, 1317, 1264, 1251, 1232, 1175, 1100, 1056, 1018, 936, 856, 793, 755, 718, 703, 657, 625, 569, 528, 431.

Anal. Calcd. (C<sub>35</sub>H<sub>52</sub>N<sub>2</sub>Zn): C, 74.25; H, 9.26; N, 4.95. Found: C, 73.38; H, 9.18; N, 4.94.

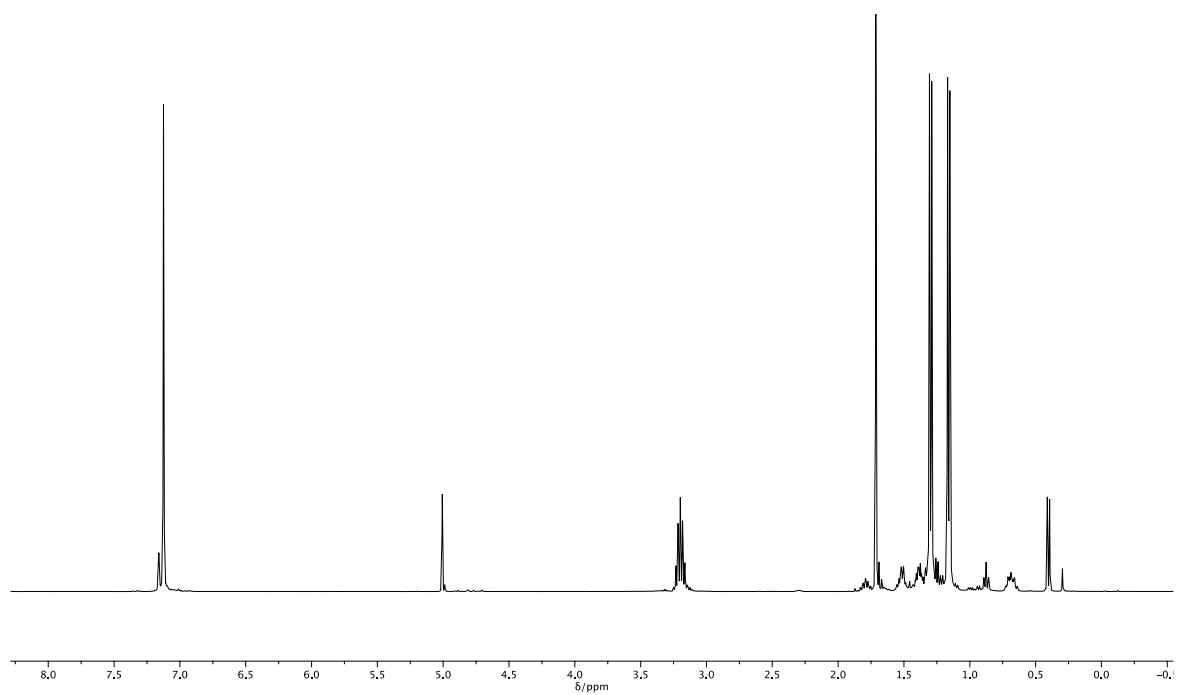

Figure S13.  $^1\text{H}$  NMR spectrum of 5c

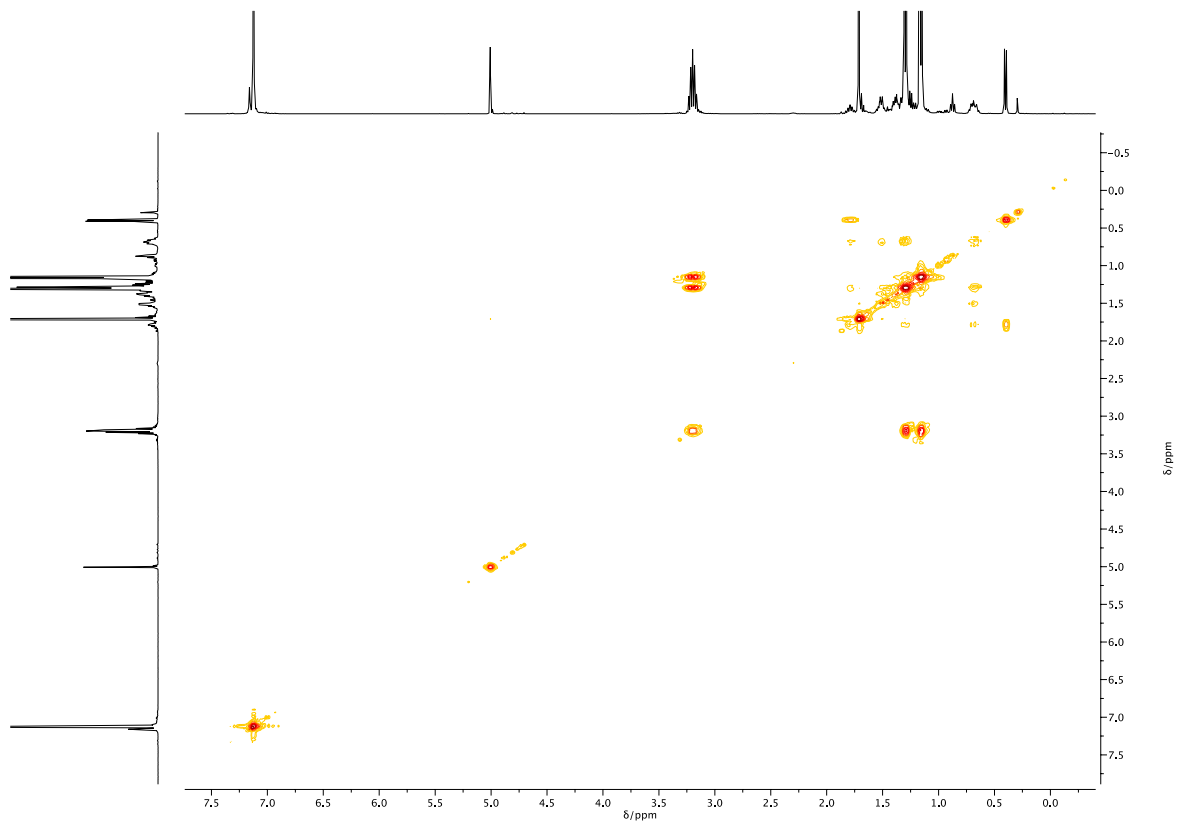

Figure S14.  $^1\text{H}$  COSY NMR spectrum of 5c

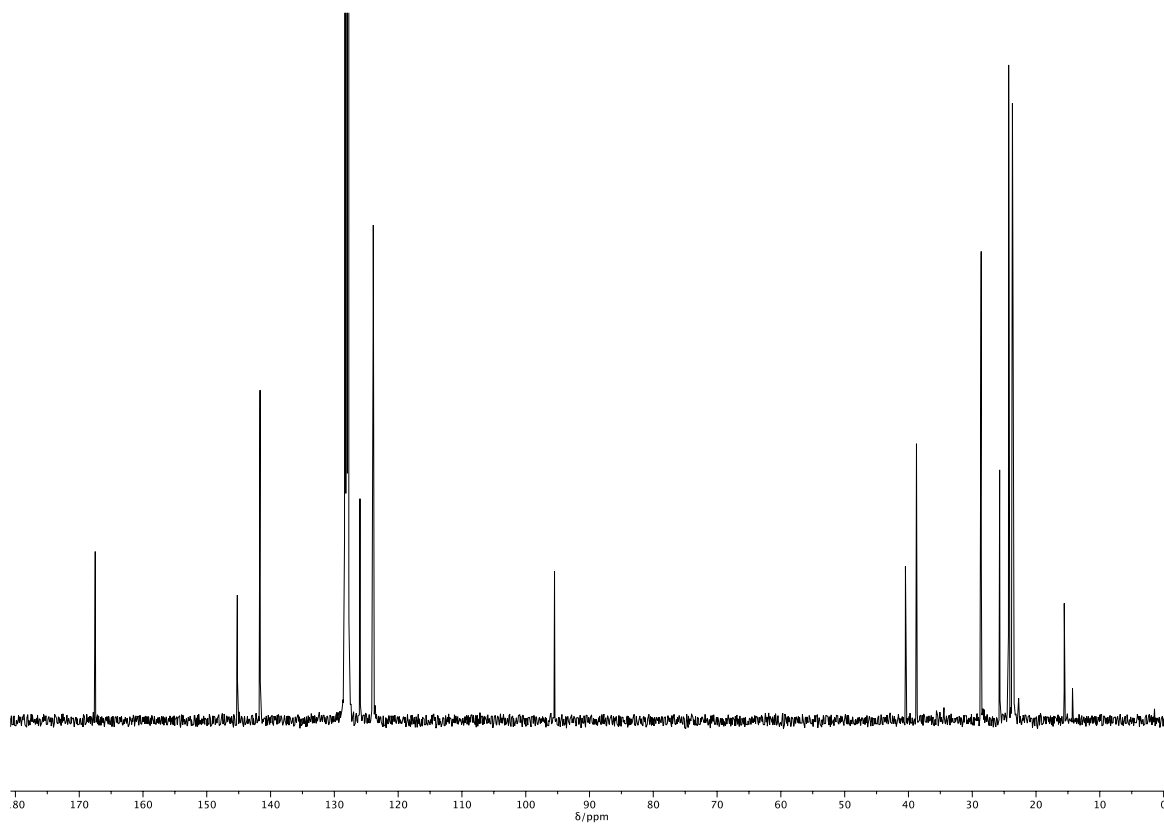

Figure S15.  $^{13}\text{C}\{^1\text{H}\}$  NMR spectrum of 5c

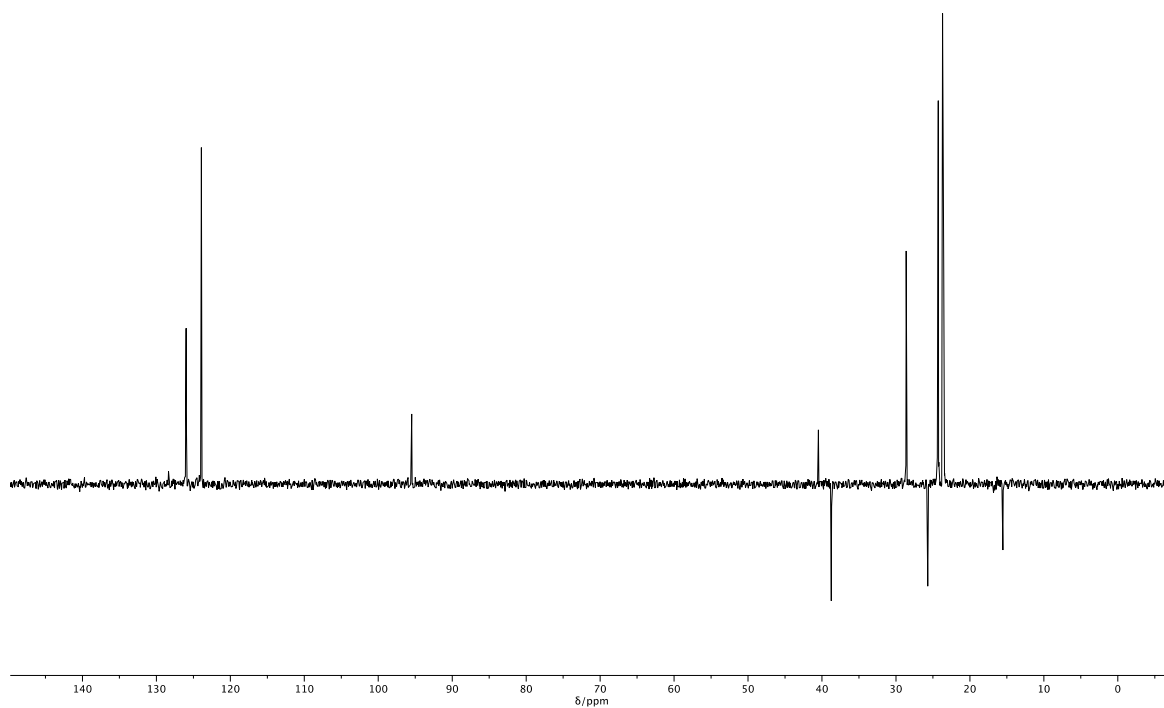

Figure S16.  $^{13}\text{C}\{^1\text{H}\}$  DEPT-135 NMR spectrum of 5c

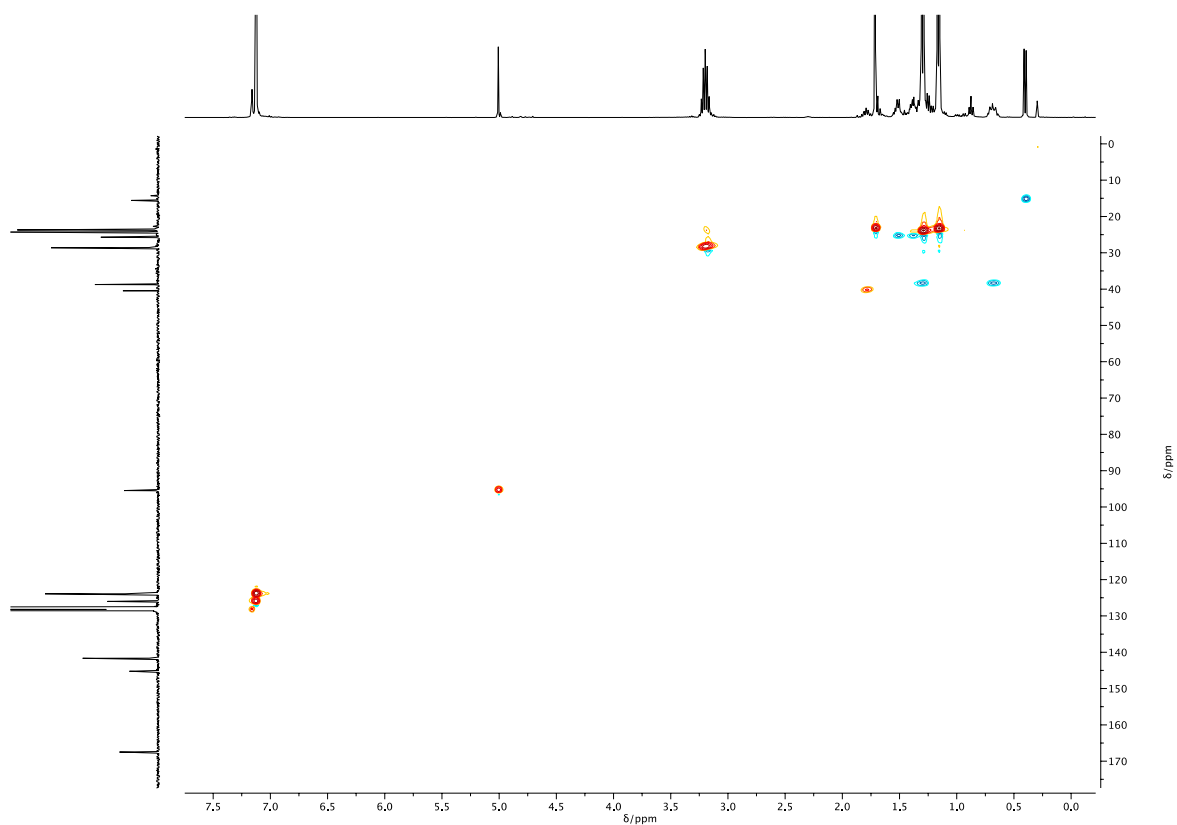

Figure S17.  $^1\text{H}$ - $^{13}\text{C}$  HSQC NMR spectrum of **5c**

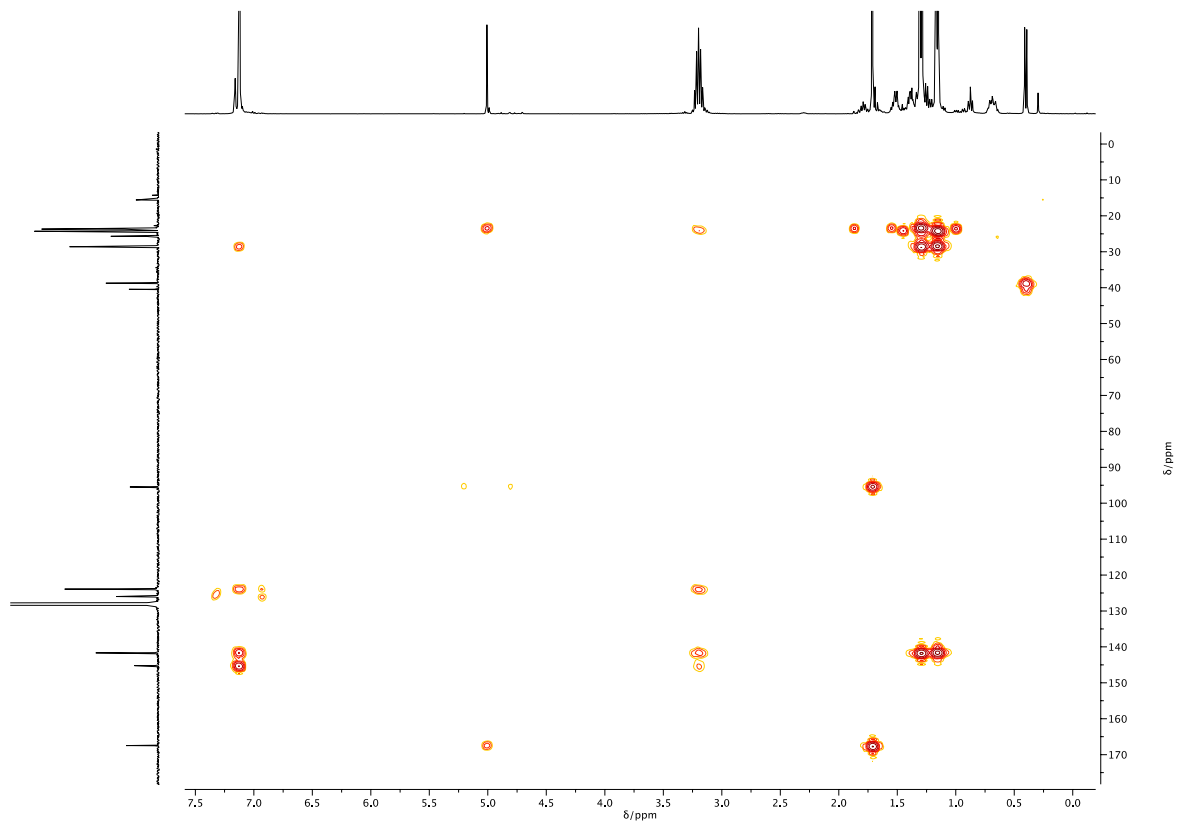

Figure S18.  $^1\text{H}$ - $^{13}\text{C}$  HMBC NMR spectrum of **5c**

## Synthesis of 5d

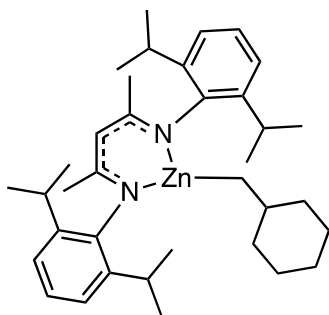

In a N<sub>2</sub> filled glovebox, a suspension of **2** (20 mg, 0.041 mmol) in C<sub>6</sub>D<sub>6</sub> (0.6 mL) was added to a J-Young NMR tube. Methylidene cyclohexane (**3d**) (6.0 μL, 4.8 mg, 0.050 mmol) was added via micropipette and the NMR tube sealed. The resulting colourless solution was heated to 100 °C for 39 hours, or until the complete consumption of **2** was observed *via* <sup>1</sup>H NMR spectroscopy. The J-Young NMR tube was returned to the glovebox, the solution diluted with toluene (0.5 mL) and

decanted into a scintillation vial. The volatiles were removed in *vacuo*, leaving an off-white solid. The solid was dissolved in n-pentane (1 mL) and filtered. The volatiles were removed in *vacuo*, leaving **5d** as an analytically pure white solid. Yield: 17.6 mg, 0.030 mmol, 73%. CH(CH<sub>2</sub>)<sub>2</sub>(CH<sub>2</sub>)<sub>2</sub>CH<sub>2</sub>

<sup>1</sup>H NMR (400 MHz, C<sub>6</sub>D<sub>6</sub>) δ: 0.27 (d, <sup>3</sup>J<sub>H-H</sub> = 6.7 Hz, 2H, Zn-CH<sub>2</sub>), 0.52-0.62 (m, 2H, CH(CH<sub>2</sub>)<sub>2</sub>(CH<sub>2</sub>)<sub>2</sub>CH<sub>2</sub>), 0.98-1.08 (m, 3H, CH(CH<sub>2</sub>)<sub>2</sub>(CH<sub>2</sub>)<sub>2</sub>CH<sub>2</sub>), 1.08-1.14 (m, 1H, CH(CH<sub>2</sub>)<sub>2</sub>(CH<sub>2</sub>)<sub>2</sub>CH<sub>2</sub>), 1.16 (d, <sup>3</sup>J<sub>H-H</sub> = 7.1 Hz, 12H, CH(CH<sub>3</sub>)<sub>2</sub>), 1.18-1.22 (m, 2H, CH(CH<sub>2</sub>)<sub>2</sub>(CH<sub>2</sub>)<sub>2</sub>CH<sub>2</sub>), 1.29 (d, <sup>3</sup>J<sub>H-H</sub> = 7.1 Hz, 12H, CH(CH<sub>3</sub>)<sub>2</sub>), 1.50-1.58 (m, 3H, CH(CH<sub>2</sub>)<sub>2</sub>(CH<sub>2</sub>)<sub>2</sub>CH<sub>2</sub>), 1.72 (s, 6H, NC(CH<sub>3</sub>)), 3.19 (sept, 4H, <sup>3</sup>J<sub>H-H</sub> = 7.1 Hz, CH(CH<sub>3</sub>)<sub>2</sub>), 5.01 (s, 1H, (CH<sub>3</sub>)C(CH)C(CH<sub>3</sub>)), 7.12 (m, 6H, Ar-H).

<sup>13</sup>C NMR (101 MHz, C<sub>6</sub>D<sub>6</sub>) δ: 19.2 (Zn-CH<sub>2</sub>), 23.6 (NC(CH<sub>3</sub>)), 23.8 (CH(CH<sub>3</sub>)<sub>2</sub>), 24.3 (CH(CH<sub>3</sub>)<sub>2</sub>), 26.7 (CH(CH<sub>2</sub>)<sub>2</sub>(CH<sub>2</sub>)<sub>2</sub>CH<sub>2</sub>), 27.6 (CH(CH<sub>2</sub>)<sub>2</sub>(CH<sub>2</sub>)<sub>2</sub>CH<sub>2</sub>), 28.6 (CH(CH<sub>3</sub>)<sub>2</sub>), 37.5 (CH(CH<sub>2</sub>)<sub>2</sub>(CH<sub>2</sub>)<sub>2</sub>CH<sub>2</sub>), 39.5 (CH(CH<sub>2</sub>)<sub>2</sub>(CH<sub>2</sub>)<sub>2</sub>CH<sub>2</sub>), 95.4 ((CH<sub>3</sub>)C(CH)C(CH<sub>3</sub>)), 123.9 (*meta*-Ar-CH), 125.9 (*para*-Ar-CH), 141.7 (*ortho*-Ar-C), 145.2 (*ipso*-Ar-C), 167.4 (CN(CH<sub>3</sub>)).

FT-IR (cm<sup>-1</sup>): 3055, 3020, 2955, 2909, 2865, 2845, 1550, 1525, 1437, 1396, 1381, 1361, 1316, 1263, 1251, 1231, 1178, 1100, 1054, 1026, 1016, 934, 885, 858, 796, 779, 759, 753, 728, 719, 702, 642, 608, 528, 439, 434.

Anal. Calcd. (C<sub>36</sub>H<sub>54</sub>N<sub>2</sub>Zn): C, 74.52; H, 9.38; N, 4.83. Found: C, 74.36; H, 9.32; N, 4.76.



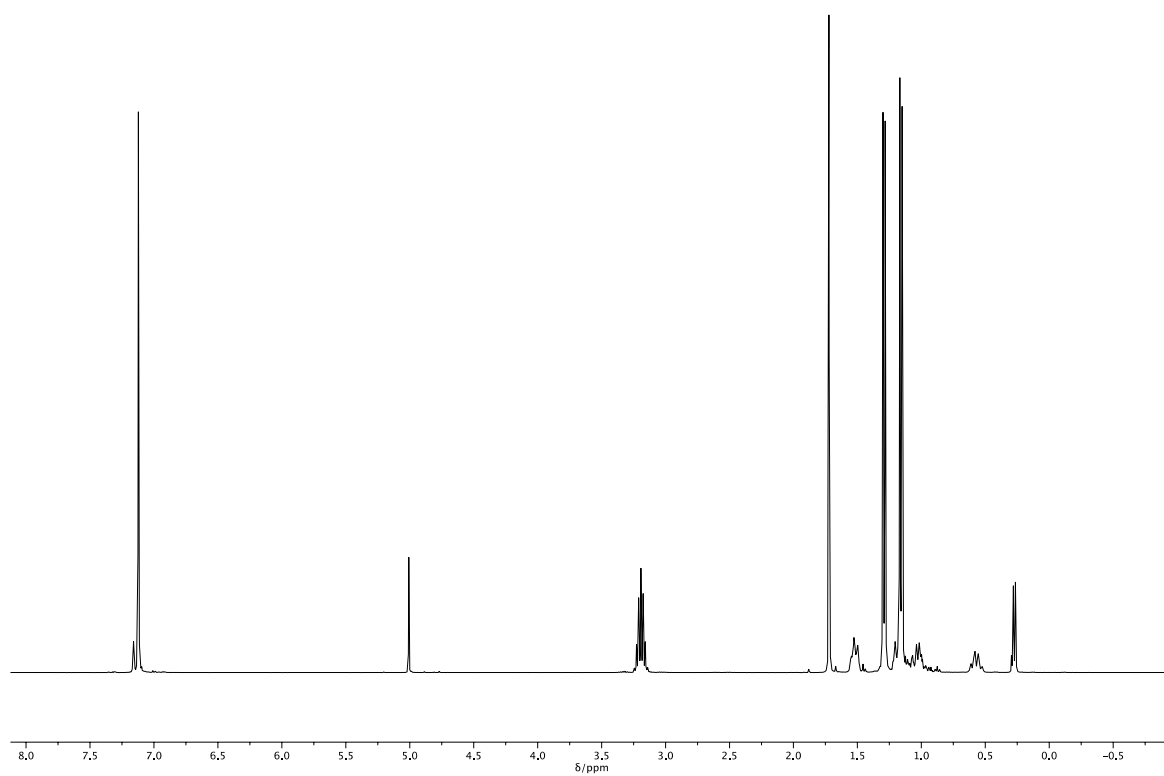

Figure S19. <sup>1</sup>H NMR spectrum of 5d

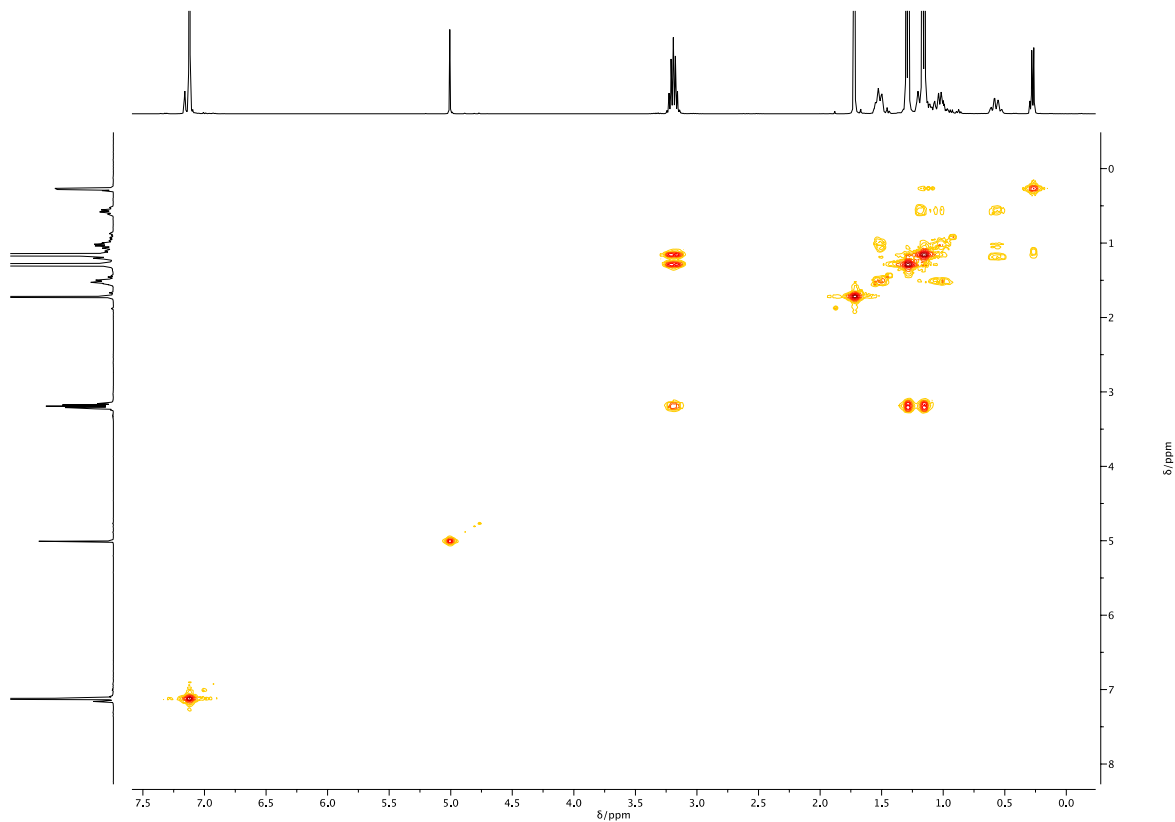

Figure S20. <sup>1</sup>H COSY NMR spectrum of 5d

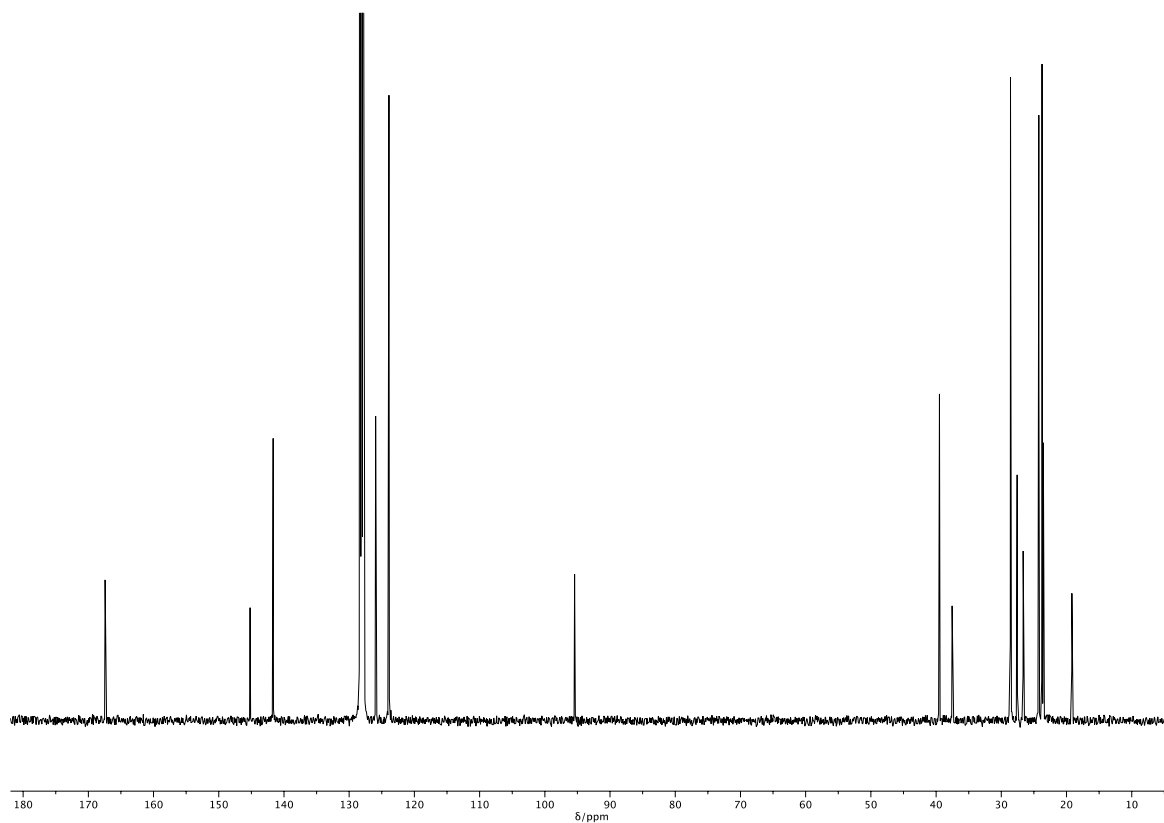

Figure S21.  $^{13}\text{C}\{^1\text{H}\}$  NMR spectrum of 5d

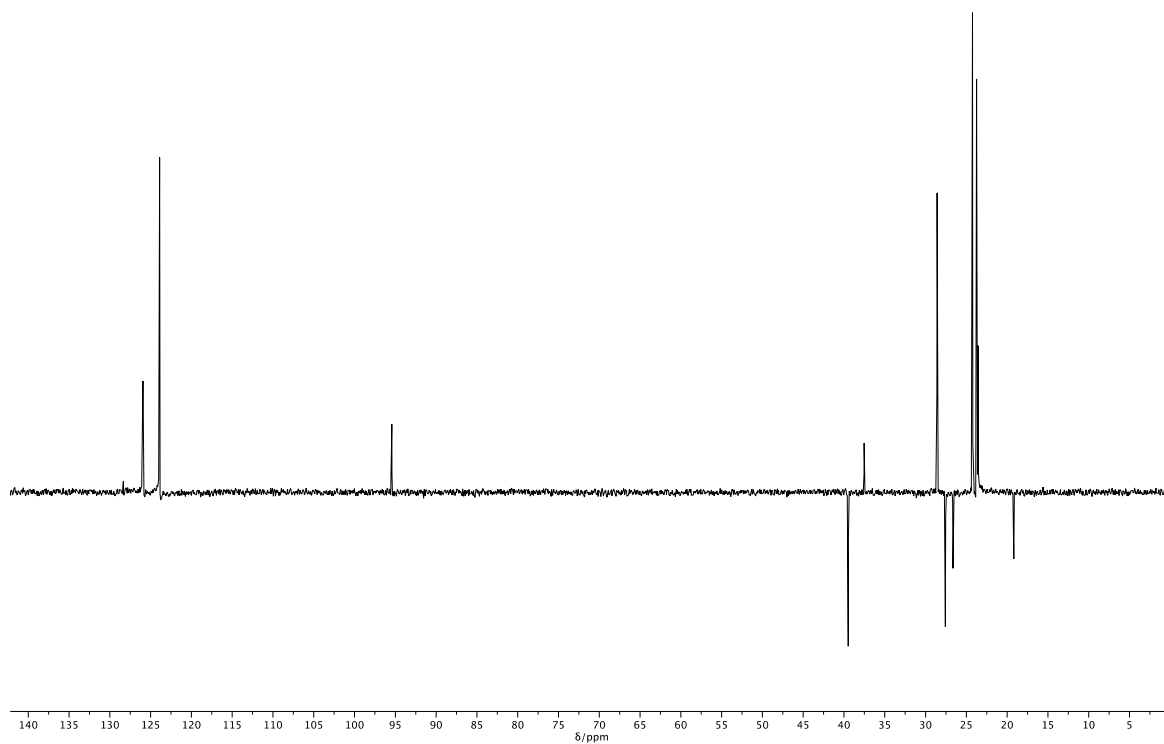

Figure S22.  $^{13}\text{C}\{^1\text{H}\}$  DEPT-135 NMR spectrum of 5d

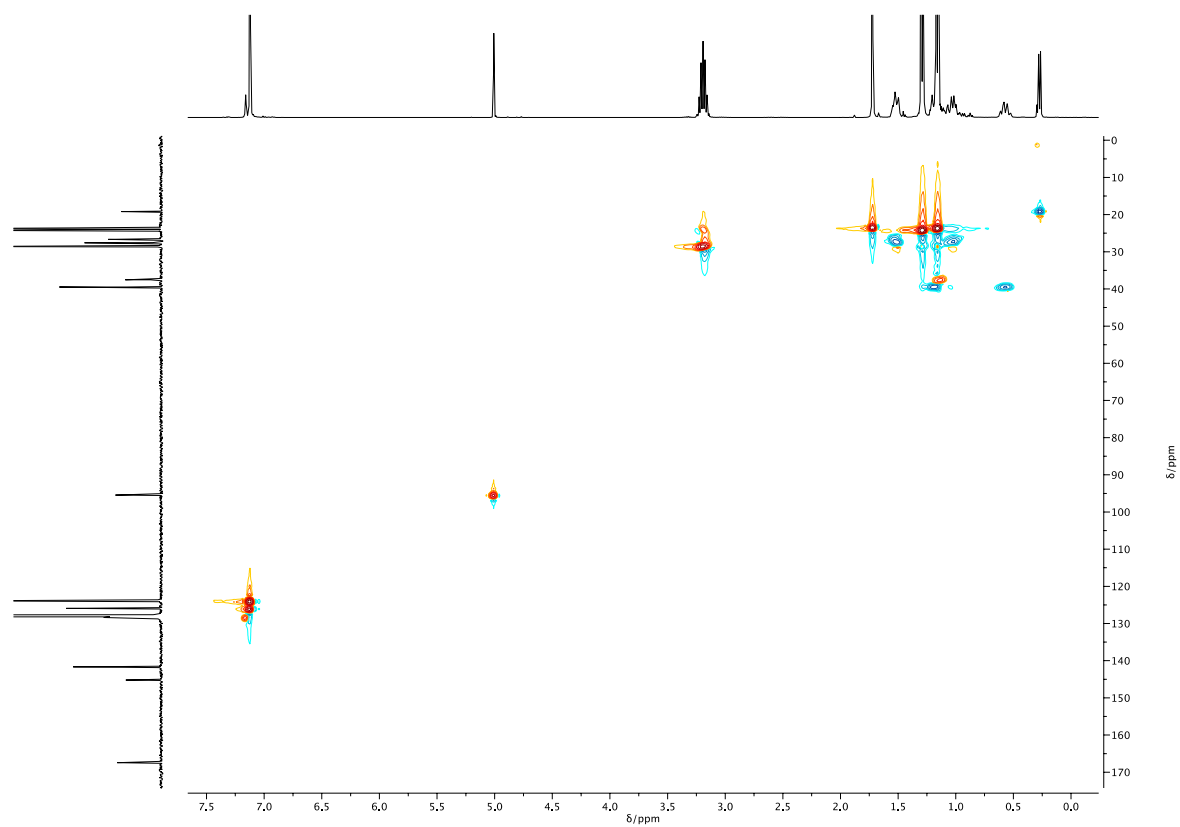

Figure S23.  $^1\text{H}$ - $^{13}\text{C}$  HSQC NMR spectrum of 5d

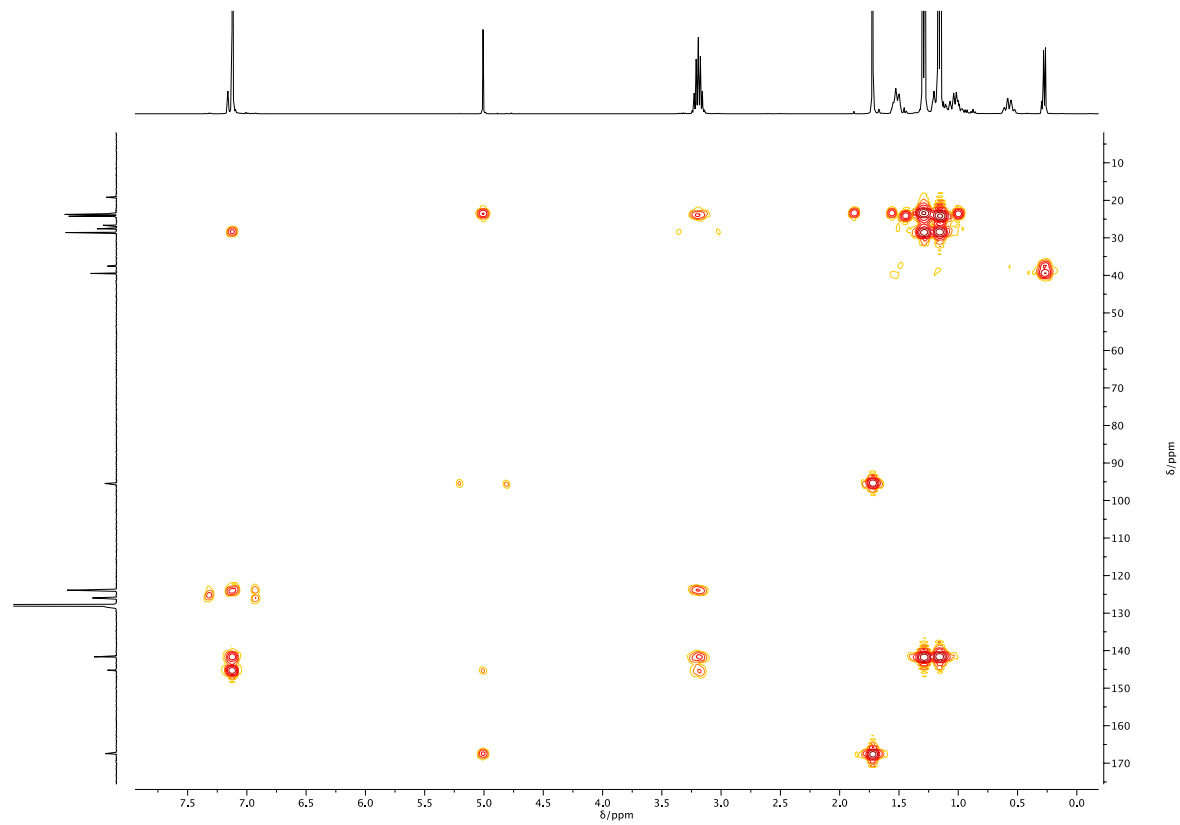

Figure S24.  $^1\text{H}$ - $^{13}\text{C}$  HMBC NMR spectrum of 5d

## Synthesis of **6b**

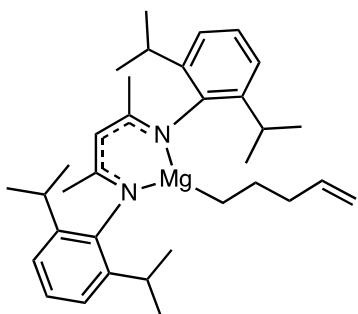

In a N<sub>2</sub> filled glovebox, a suspension of **1** (20 mg, 0.045 mmol) in C<sub>6</sub>D<sub>6</sub> (0.6 mL) was added to a J-Young NMR tube. Methylidene cyclobutane (**3b**) (20 μL, 14.7 mg, 0.22 mmol) was added via micropipette and the NMR tube sealed. The resulting pale-yellow solution was monitored over 24 hours at 60, 80 and 100 °C. At each temperature the concomitant formation of both **6b** and **8b** was observed, in a **6b:8b** ratio of 6.0:1, 4.9:1 and 3.2:1, respectively, after heating for 5 hours.

The highest ratio of **6b** in the reaction mixture is observed at 60 °C, but longer reaction times (72 h) are required for the reaction to reach completion. The J-Young NMR tube was returned to the glovebox, the solution diluted with toluene (0.5 mL) and decanted into a scintillation vial. The volatiles were removed in *vacuo*, leaving an off-white crystalline solid. The solid was dissolved in n-pentane (2 x 0.5 mL) and filtered. The volatiles were removed in *vacuo*, leaving a mixture of **6b** and **8b** as a white powder (22.1 mg). A mixture of **6b** and **8b** is always observed after work-up (typically in a **6b:8b** ratio of 5:1), and the similar solubilities of the two species made separation impossible in our hands. Yield: 18.4 mg, 0.036 mmol, 80 % (as component of mixture). A combination of selective excitation TOCSY, DEPT-edited HSQC and HMBC NMR experiments were used to determine alkene <sup>1</sup>H and <sup>13</sup>C resonances of **6b**, alongside pure <sup>1</sup>H and <sup>13</sup>C{<sup>1</sup>H} spectra of **8b**.

<sup>1</sup>H NMR (400 MHz, C<sub>6</sub>D<sub>6</sub>) δ: -0.25 (t, <sup>3</sup>J<sub>H-H</sub> = 8.1 Hz, 2H, Mg-CH<sub>2</sub>), 1.15 (d, <sup>3</sup>J<sub>H-H</sub> = 6.8 Hz, 12H, CH(CH<sub>3</sub>)<sub>2</sub>), 1.27 (d, <sup>3</sup>J<sub>H-H</sub> = 6.8 Hz, 12H, CH(CH<sub>3</sub>)<sub>2</sub>), 1.44 (m, 2H, MgCH<sub>2</sub>CH<sub>2</sub>), 1.65 (s, 12H, NC(CH<sub>3</sub>)<sub>3</sub>), 1.77 (m, 2H, MgCH<sub>2</sub>CH<sub>2</sub>CH<sub>2</sub>), 3.16 (sept, <sup>3</sup>J<sub>H-H</sub> = 7.1 Hz, 4H, CH(CH<sub>3</sub>)<sub>2</sub>), 4.81-4.91 (overlapping ddt, 2H, CHCH<sub>2</sub>), 4.93 (s, 2H, (CH<sub>3</sub>)C(CH)C(CH<sub>3</sub>)), 5.77 (ddt, 1H, CH<sub>2</sub>CHCH<sub>2</sub>), 7.08-7.13 (multi, 6H, Ar-H).

<sup>13</sup>C NMR (101 MHz, C<sub>6</sub>D<sub>6</sub>) δ: 5.5 (Mg-CH<sub>2</sub>), 23.5 (CH(CH<sub>3</sub>)<sub>2</sub>), 23.6 (NC(CH<sub>3</sub>)<sub>3</sub>), 24.7 (CH(CH<sub>3</sub>)<sub>2</sub>), 28.3 (MgCH<sub>2</sub>CH<sub>2</sub>), 28.6 (CH(CH<sub>3</sub>)<sub>2</sub>), 42.0 (MgCH<sub>2</sub>CH<sub>2</sub>CH<sub>2</sub>), 95.3 ((CH)C(CH<sub>3</sub>)<sub>2</sub>), 113.4 (CH=CH<sub>2</sub>), 124.1 (*para*-Ar-CH), 126.0 (*meta*-Ar-CH), 141.3 (*ortho*-Ar-C), 142.0 (*ipso*-Ar-C), 141.9 (CH=CH<sub>2</sub>), 169.3 (4x NC(CH<sub>3</sub>)<sub>3</sub>).

FT-IR (cm<sup>-1</sup>): 3071, 2975, 2846, **1648 (C=C stretch)**, 1605, 1565, 1486, 1398, 1329, 1299, 1241, 1206, 1133, 1076, 1027, 986, 954, 922, 845, 797.

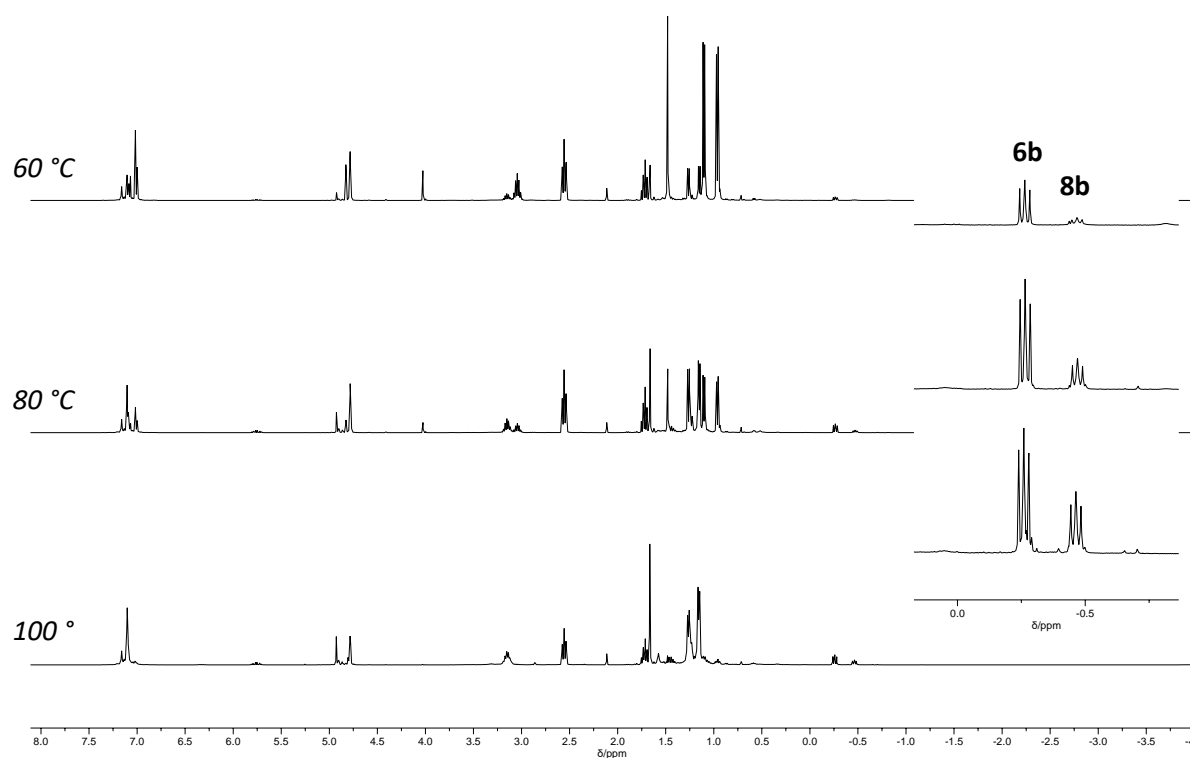

**Figure S25.** Stacked  $^1\text{H}$  NMR spectra of reaction between **1** and **3b** at 60–100 °C after 5 h: formation of both **6b** and **8b** are observed

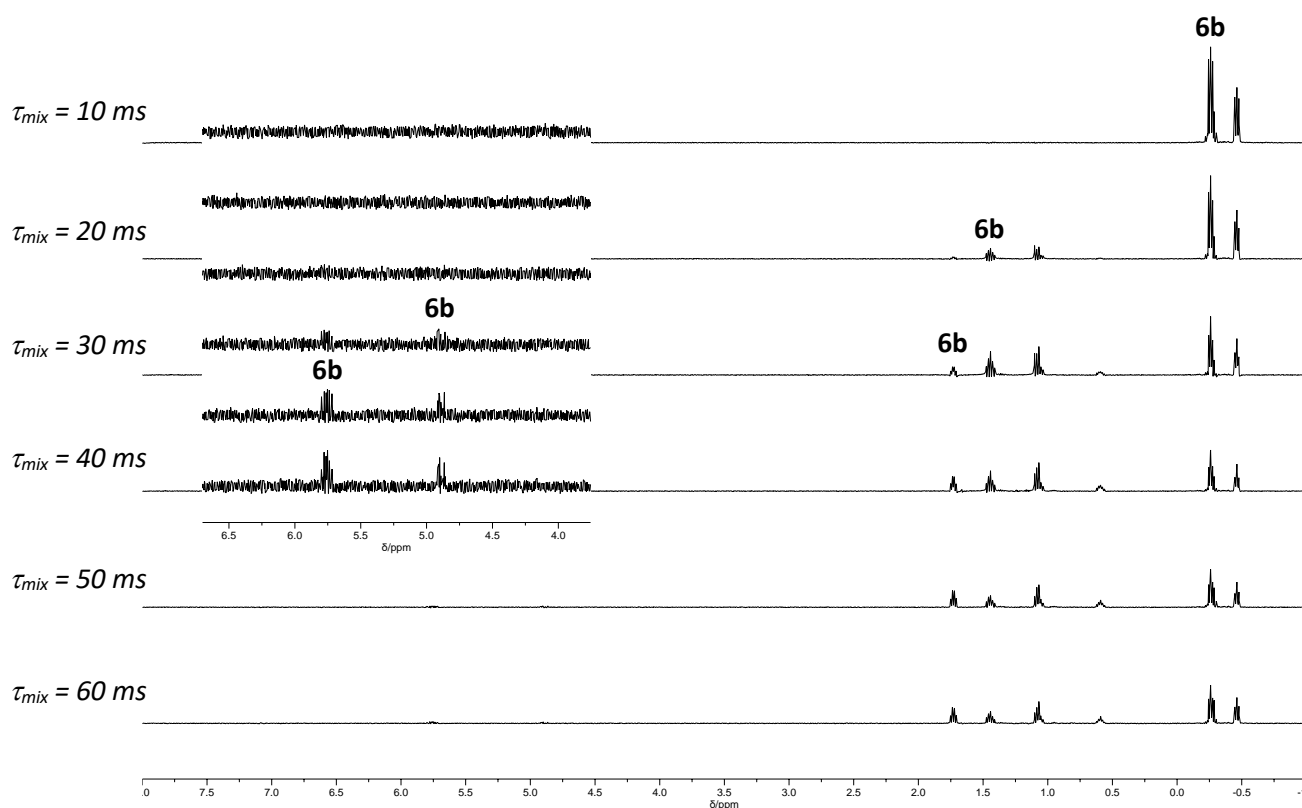

**Figure S26.** Labelled stacked selective excitation (-0.25 ppm)  $^1\text{H}$  TOCSY NMR spectra showing  $\text{CH}_x$  groups along hydrocarbon chain of **6b** (note a small amount of **8b** is also observed)

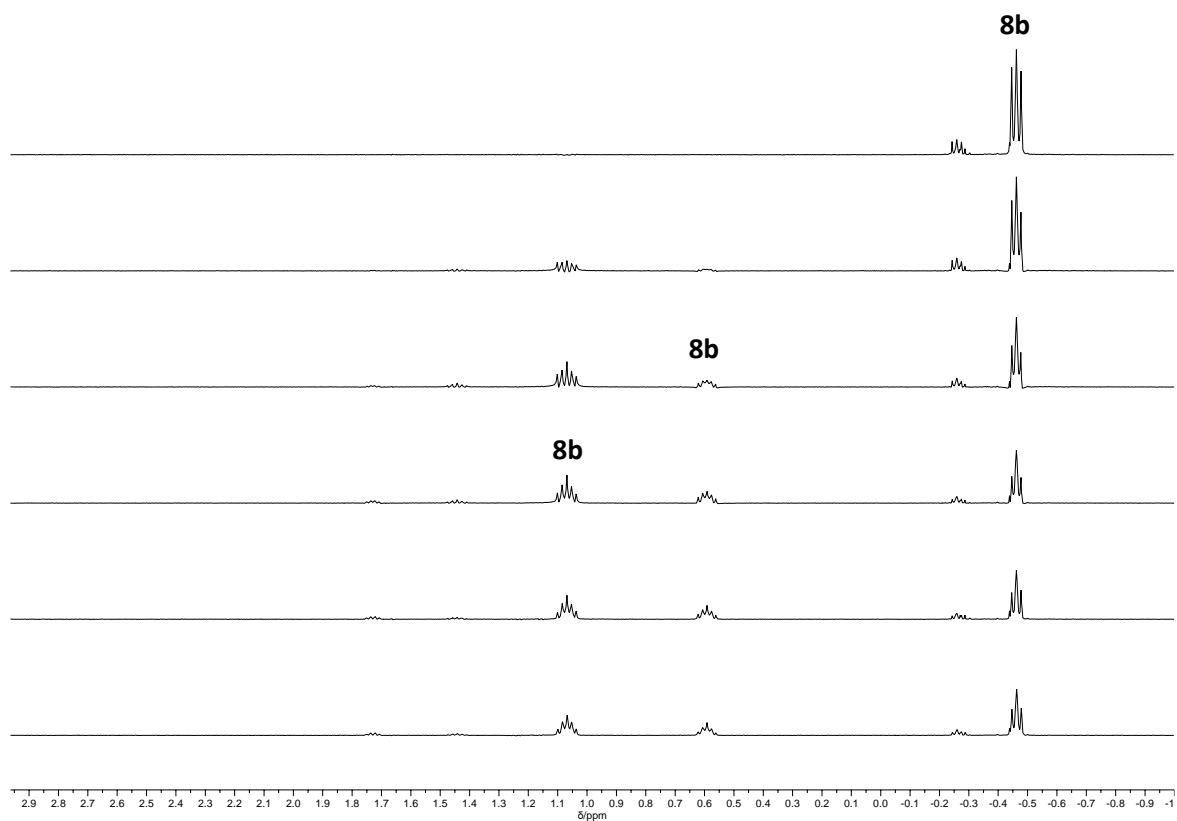

**Figure S27.** Labelled stacked selective excitation (-0.45 ppm)  $^1\text{H}$  TOCSY NMR spectra showing  $\text{CH}_2$  groups along hydrocarbon chain of **8b** (note a small amount of **6b** is also observed)

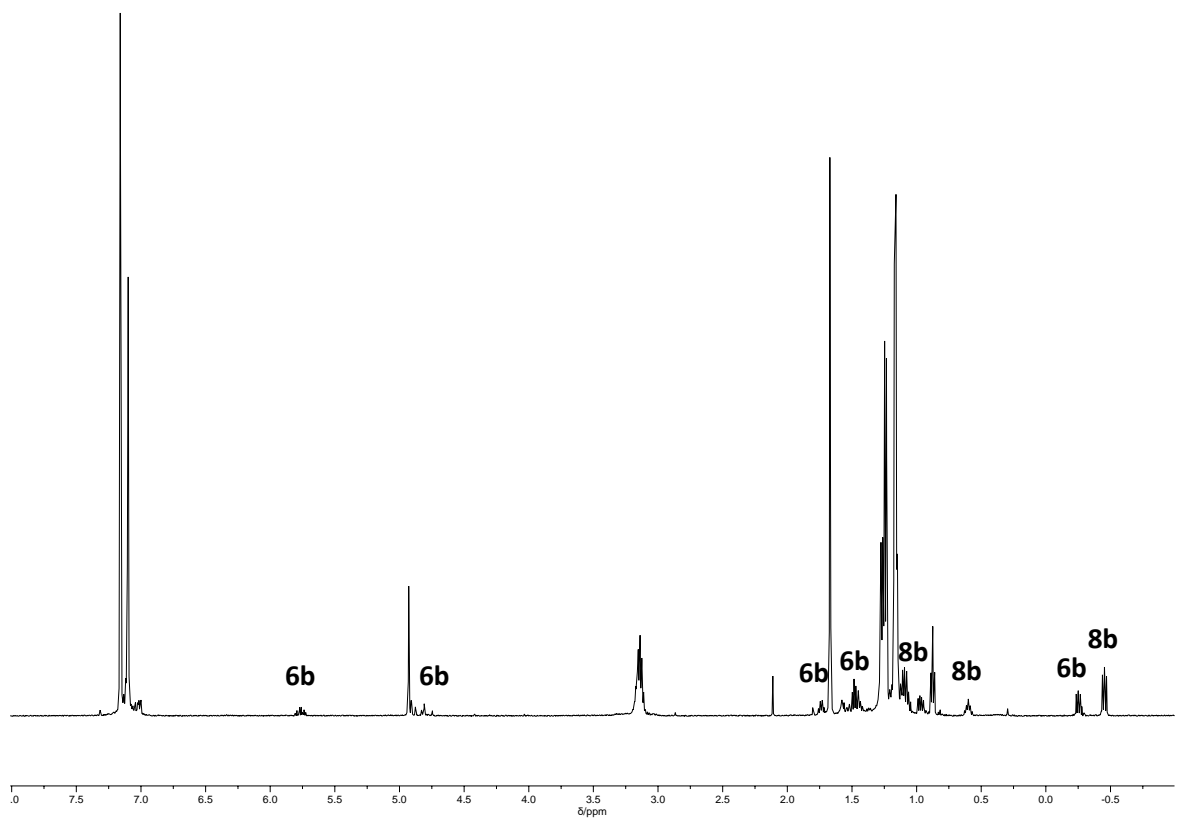

**Figure S28.** Labelled  $^1\text{H}$  NMR spectrum of mixture of **6b** and **8b** (obtained from reaction of **1** and **3b** after 5 h at 100 °C)

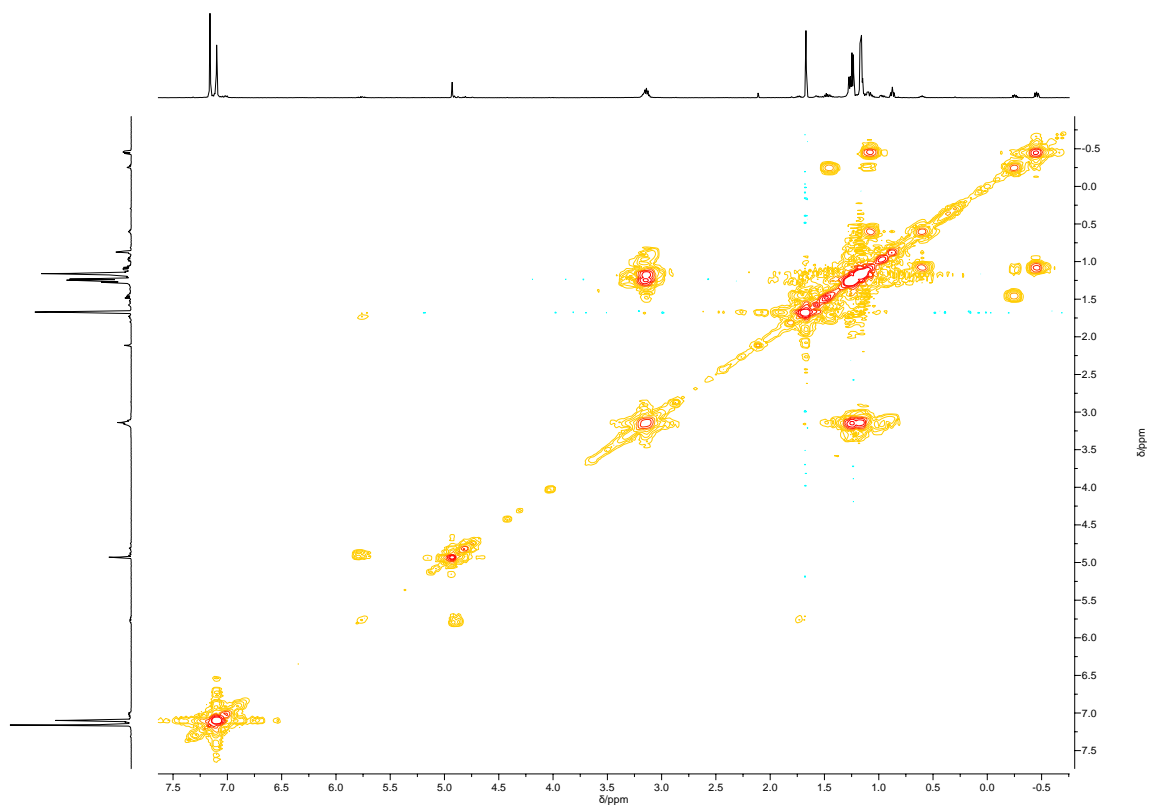

**Figure S29.** <sup>1</sup>H COSY NMR spectrum of mixture of **6b** and **8b** (obtained from reaction of **1** and **3b** after 5 h at 100 °C)

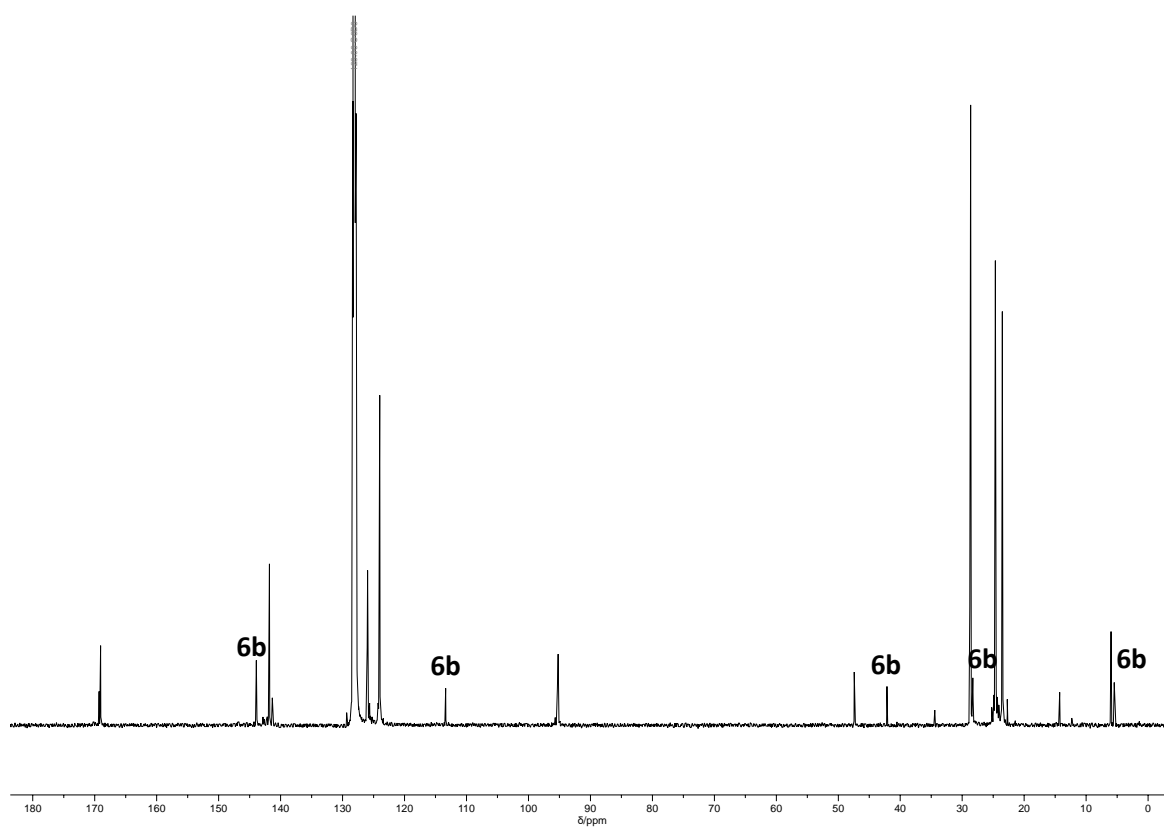

**Figure S30.** Labelled <sup>13</sup>C{<sup>1</sup>H} NMR spectrum of mixture of **6b** and **8b** (obtained from reaction of **1** and **3b** after 5 h at 100 °C)

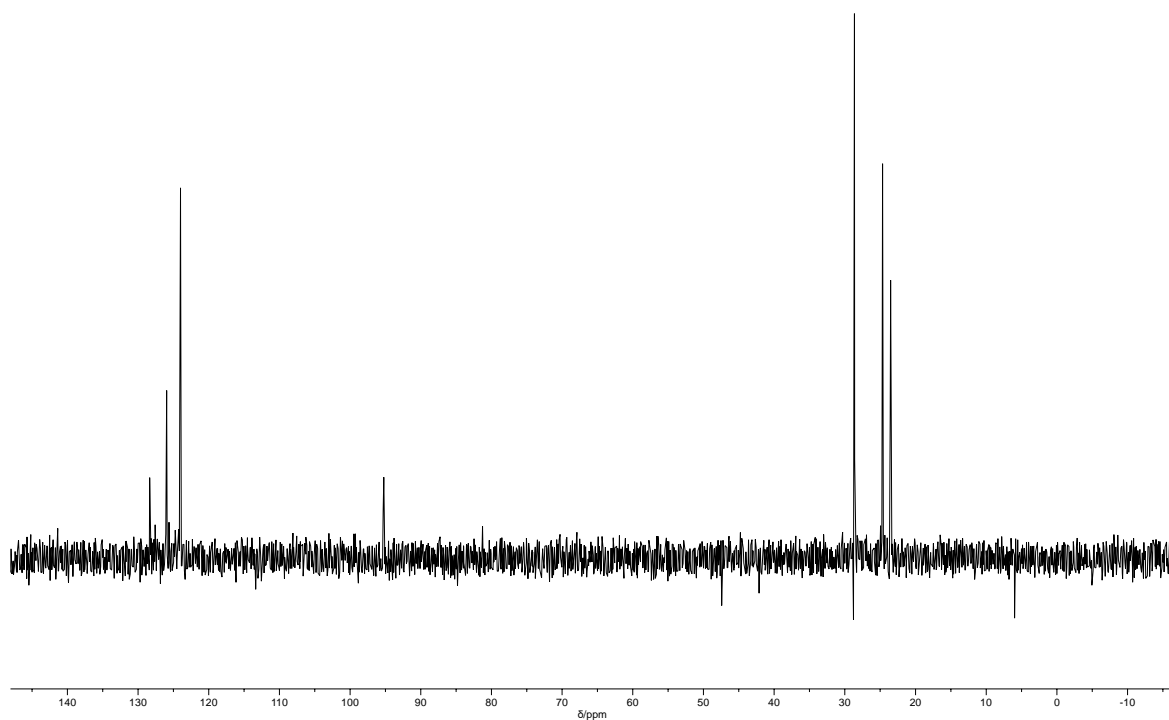

**Figure S31.**  $^{13}\text{C}\{^1\text{H}\}$  DEPT-135 NMR spectrum of mixture of **6b** and **8b** (obtained from reaction of **1** and **3b** after 5 h at 100 °C)

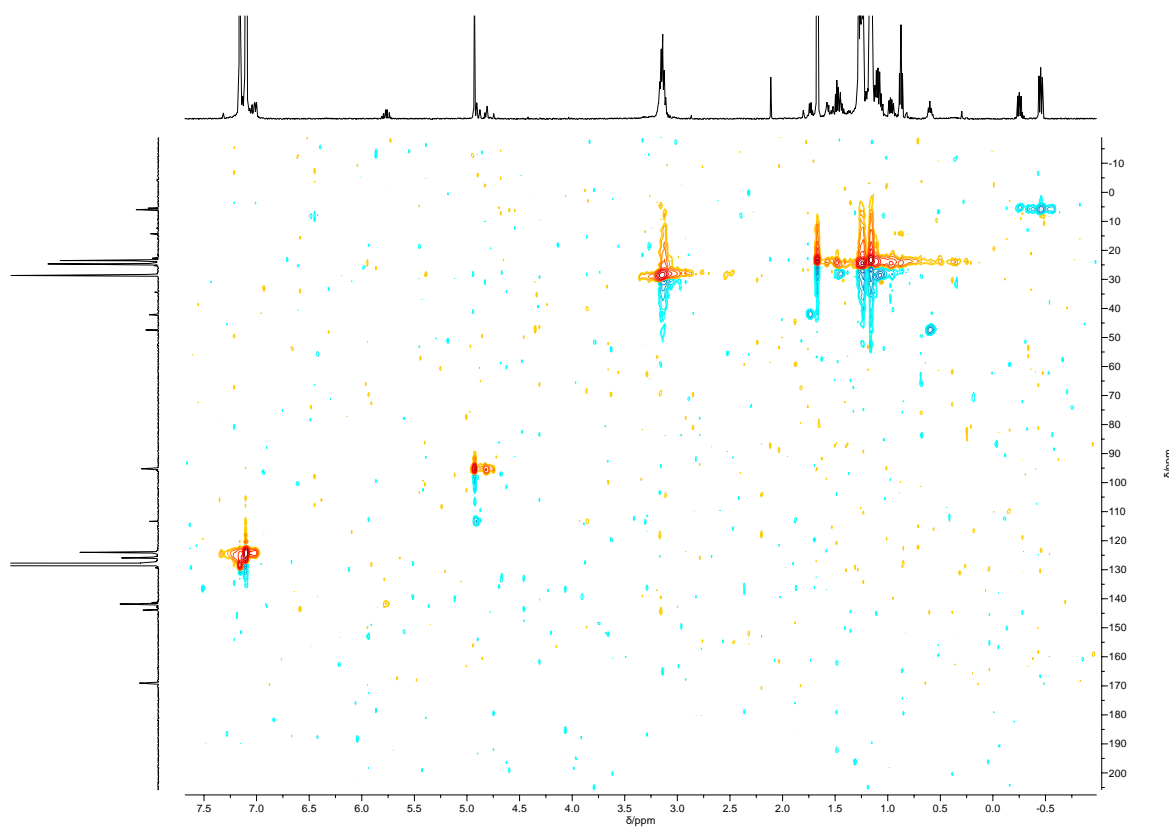

**Figure S32.**  $^1\text{H}-^{13}\text{C}$  HSQC NMR spectrum of mixture of **6b** and **8b** (obtained from reaction of **1** and **3b** after 5 h at 100 °C)



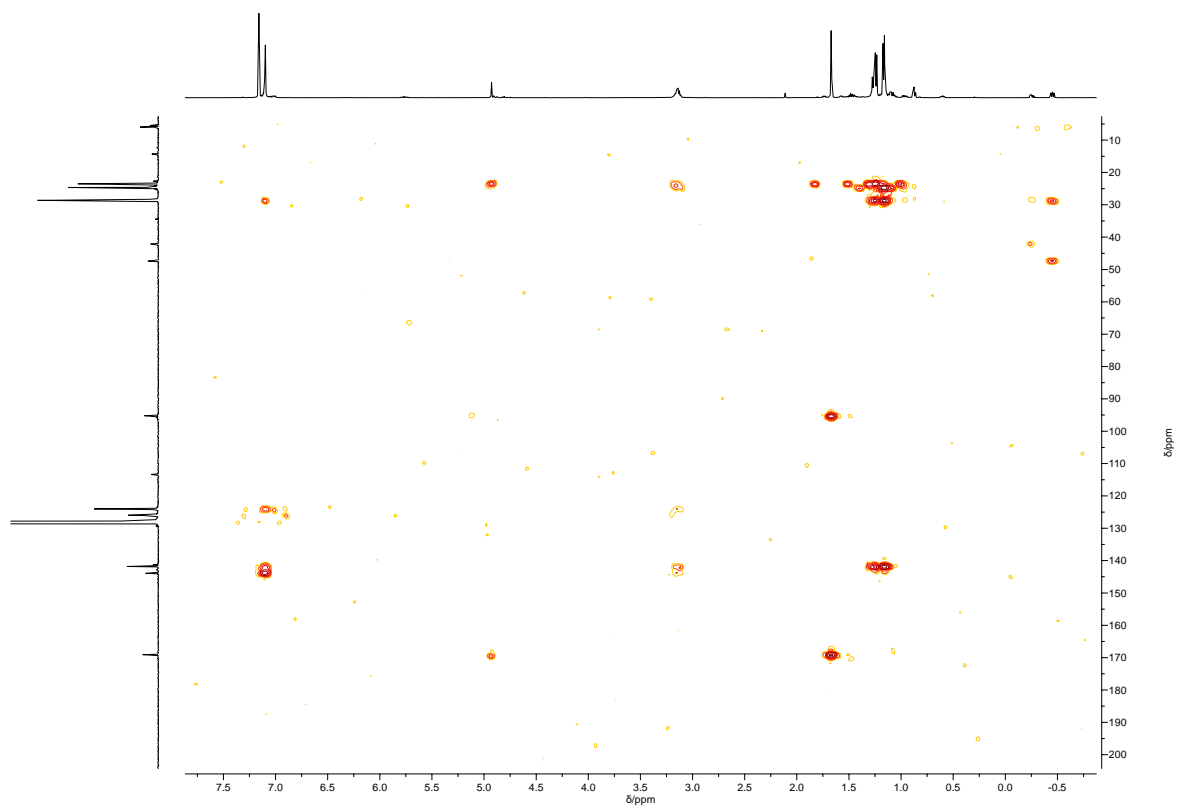

**Figure S33.**  $^1\text{H}$ - $^{13}\text{C}$  HMBC NMR spectrum of mixture of **6b** and **8b** (obtained from reaction of **1** and **3b** after 5 h at 100 °C)

## Synthesis of **7a**

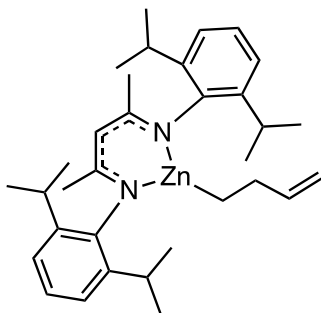

In a N<sub>2</sub> filled glovebox, a suspension of **2** (20 mg, 0.041 mmol) in C<sub>6</sub>D<sub>6</sub> (0.6 mL) was added to a J-Young NMR tube. Methylidene cyclopropane (**3a**) was added cold via micropipette and the NMR tube sealed. Note, the high volatility of **3a** (boiling point = 11 °C) makes accurate addition of this reagent challenging and in practice an excess is added. The resulting colourless solution was heated to 80 °C for 16 hours. After this time, analysis by <sup>1</sup>H NMR spectroscopy reveals a large excess of **3a** remained unreacted with **2** had been completely consumed. Additional portions of **2** were added and subsequently heated to 80 °C overnight (16-23 hours) until complete consumption of **3a** was observed *via* <sup>1</sup>H NMR spectroscopy. Note, a secondary species was also observed to form in tandem with **7a**, proposed to be the non-ring opened product (**5a**), identified through diagnostic resonances at -0.39 – -0.36 ppm (m, 2H, CH<sub>2</sub>CH(CH<sub>2</sub>)<sub>2</sub>), 0.15 – 0.20 ppm (m, 2H, CH<sub>2</sub>CH(CH<sub>2</sub>)<sub>2</sub>), 0.24 ppm (d, 2H, <sup>3</sup>J<sub>H-H</sub> = 7.20 Hz, Zn-CH<sub>2</sub>) and 0.35 – 0.43 ppm (m, 1H CH<sub>2</sub>CH(CH<sub>2</sub>)<sub>2</sub>). The high field region of the <sup>1</sup>H NMR spectrum of an approximate 1:3 mixture of **5a**:**7a** is presented below, alongside a selective excitation TOCSY spectrum of the same region (excited at -0.37 ppm) which shows these resonances are all part of the same spin system (Figure S34). **5a** can be converted to **7a** with extended heating (~2 weeks) at 100 °C. The J-Young NMR tube was returned to the glovebox, the solution diluted with toluene (0.5 mL) and decanted into a scintillation vial. The volatiles were removed in *vacuo*, leaving an off-white residue. The residue was dissolved in n-pentane (2 x 0.5 mL) and filtered. The volatiles were removed in *vacuo*, leaving **7a** as an analytically pure white solid. Yield: 65 mg, 0.12 mmol, 92 %. HSQC NMR experiment was used to determine alkene <sup>1</sup>H and <sup>13</sup>C resonances observed.

<sup>1</sup>H NMR (400 MHz, C<sub>6</sub>D<sub>6</sub>) δ: 0.31 (m, 2H, Zn-CH<sub>2</sub>), 1.15 (d, <sup>3</sup>J<sub>H-H</sub> = 7.1 Hz, 12H, CH(CH<sub>3</sub>)<sub>2</sub>), 1.26 (d, <sup>3</sup>J<sub>H-H</sub> = 7.1 Hz, 12H, CH(CH<sub>3</sub>)<sub>2</sub>), 1.70 (s, 6H, NC(CH<sub>3</sub>)), 1.85-1.92 (m, 2H, ZnCH<sub>2</sub>CH<sub>2</sub>), 3.18 (sept., 4H, <sup>3</sup>J<sub>H-H</sub> = 7.1 Hz, CH(CH<sub>3</sub>)<sub>2</sub>), 4.68-4.83 (m, 2H, ZnCH<sub>2</sub>CH<sub>2</sub>CHCH<sub>2</sub>), 5.00 (s, 1H, (CH<sub>3</sub>)C(CH)C(CH<sub>3</sub>)), 5.52-5.62 (m, 1H, ZnCH<sub>2</sub>CH<sub>2</sub>CH), 7.11 (m, 6H, Ar-H).

<sup>13</sup>C NMR (101 MHz, C<sub>6</sub>D<sub>6</sub>) δ: 6.9 (Zn-CH<sub>2</sub>), 23.4 (NC(CH<sub>3</sub>)), 23.6 (CH(CH<sub>3</sub>)<sub>2</sub>), 24.3 (CH(CH<sub>3</sub>)<sub>2</sub>), 28.5 (CH(CH<sub>3</sub>)<sub>2</sub>), 32.2 (ZnCH<sub>2</sub>CH<sub>2</sub>), 95.5 ((CH<sub>3</sub>)C(CH)C(CH<sub>3</sub>)), 110.9 (ZnCH<sub>2</sub>CH<sub>2</sub>CHCH<sub>2</sub>), 123.9 (*meta*-Ar-CH), 126.1 (*para*-Ar-CH), 141.6 (*ortho*-Ar-C), 145.0 (ZnCH<sub>2</sub>CH<sub>2</sub>CH), 145.2 (*ipso*-Ar-C), 167.6 (NC(CH<sub>3</sub>)).

FT-IR (cm<sup>-1</sup>): 3059, 3024, 2956, 2921, 2865, **1633 (C=C stretch)**, 1550, 1523, 1436, 1381, 1360, 1317, 1263, 1251, 1230, 1176, 1100, 1054, 1022, **990 (out-of-plane C-H bend)**, 934, **902 (out-of-plane C-H bend)**, 858, 794, 756, 719, 704, 671, 636, 605, 555, 529, 434.

Anal. Calcd. (C<sub>33</sub>H<sub>48</sub>N<sub>2</sub>Zn): C, 73.65; H, 8.99; N, 5.21. Found: C, 71.93; H, 8.37; N, 5.18. Note, the highly air-sensitive nature of this compound prevented collection of accurate elemental analysis.

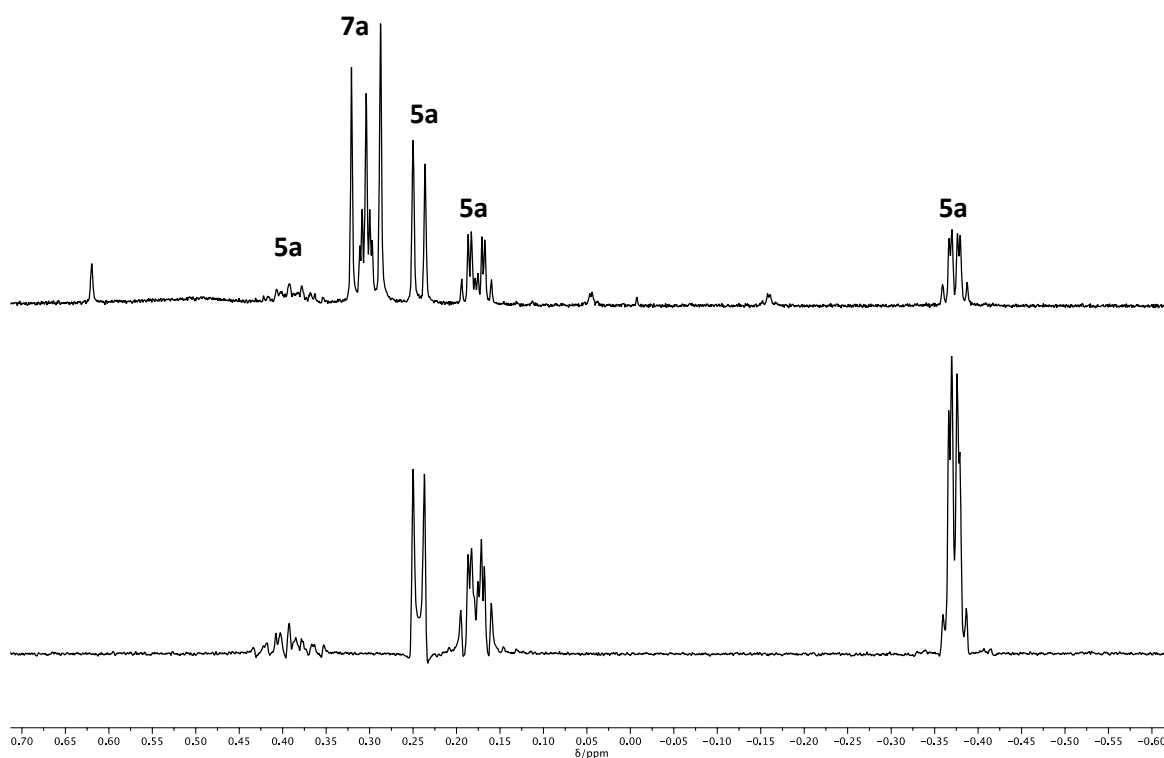

**Figure S34.** Stacked high field region of the <sup>1</sup>H NMR spectra (-0.60 – 0.7 ppm) of a 1:3 mixture of **5a**:**7a** (top) and a selective excitation TOCSY with excitation at -0.37 ppm (bottom)

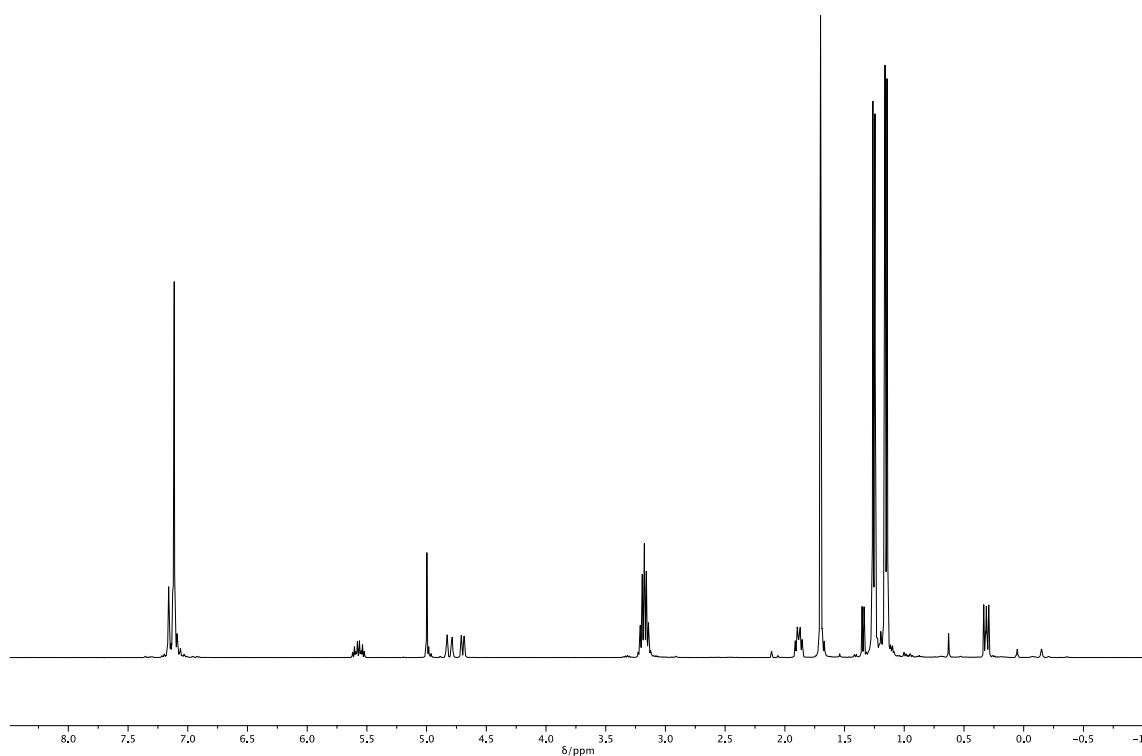

**Figure S35.** <sup>1</sup>H NMR spectrum of **7a**

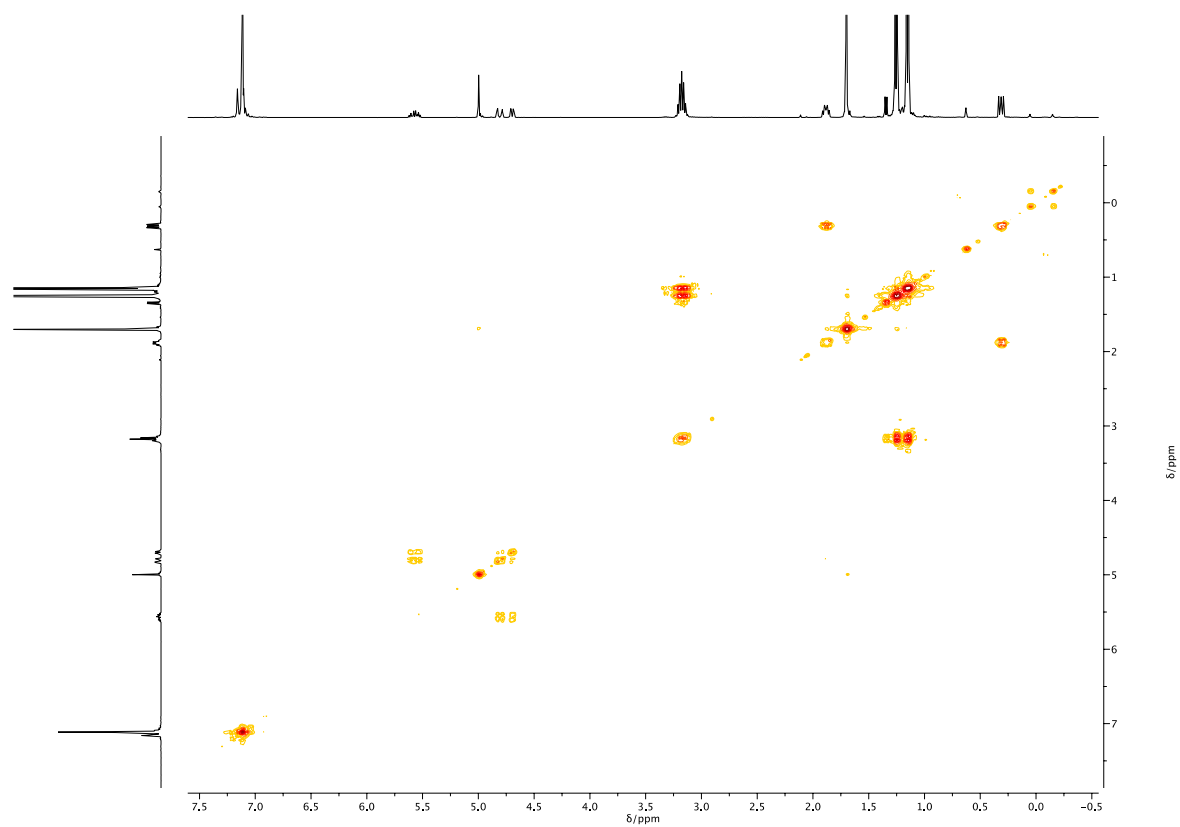

Figure S36. <sup>1</sup>H COSY NMR spectrum of 7a

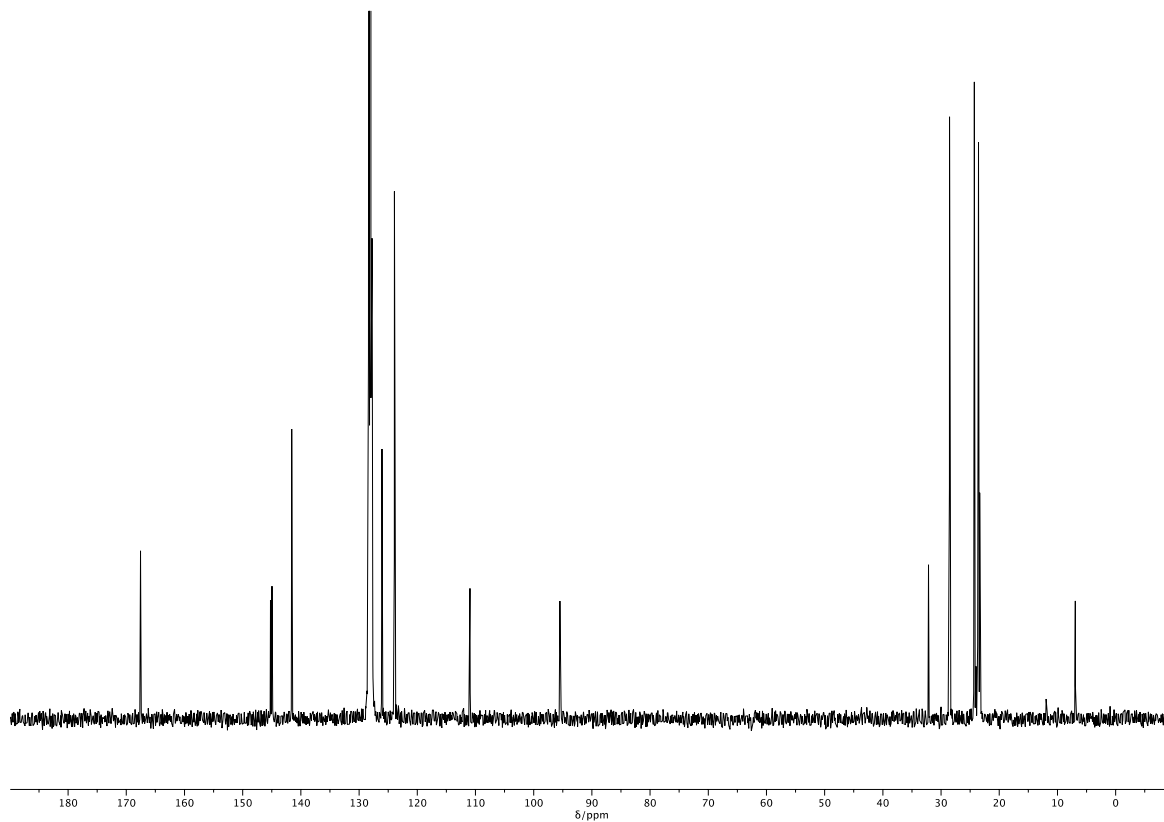

Figure S37. <sup>13</sup>C{<sup>1</sup>H} NMR spectrum of 7a

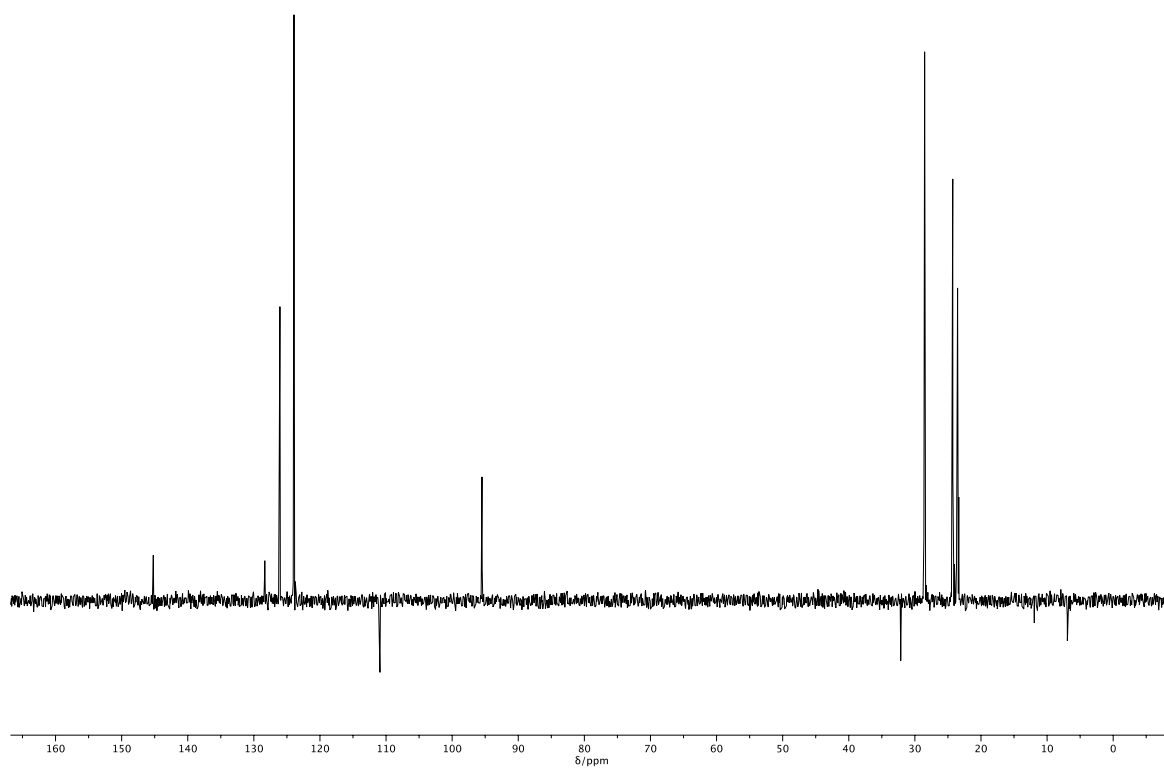

Figure S38.  $^{13}\text{C}\{^1\text{H}\}$  DEPT-135 NMR spectrum of **7a**

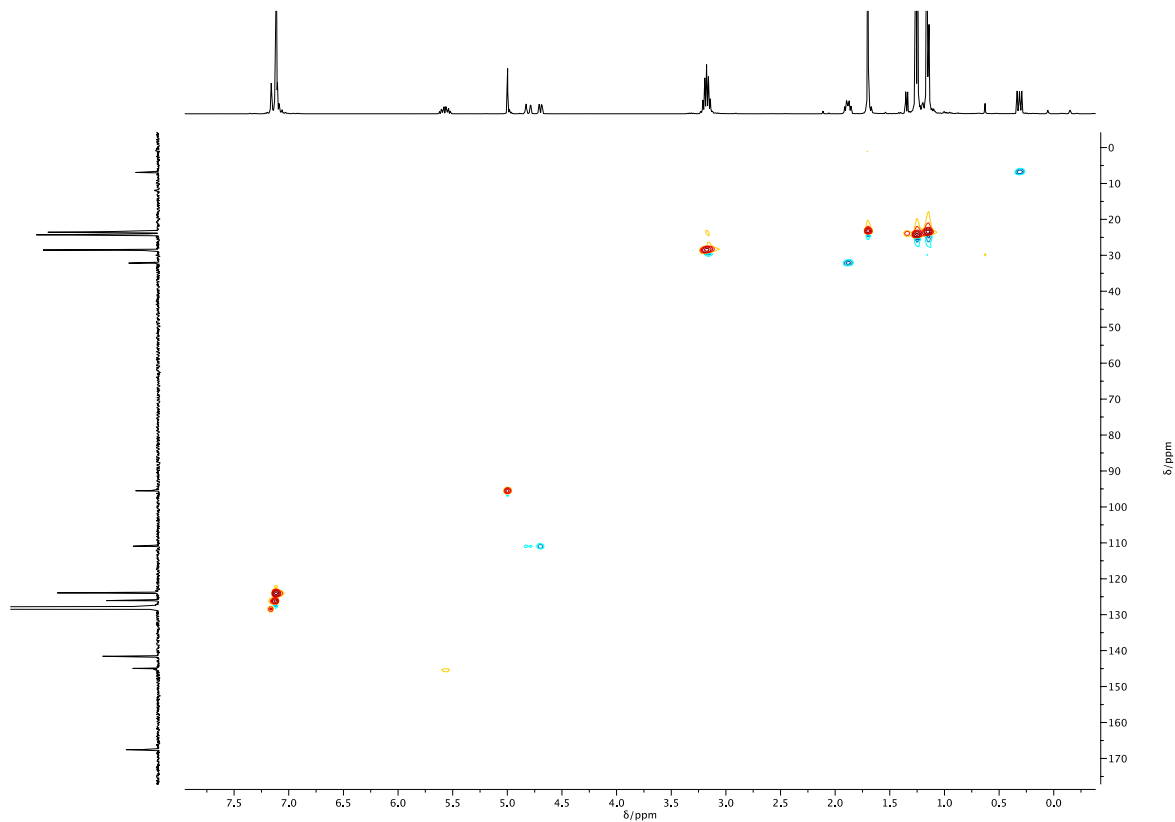

Figure S39.  $^1\text{H}-^{13}\text{C}$  HSQC NMR spectrum of **7a**

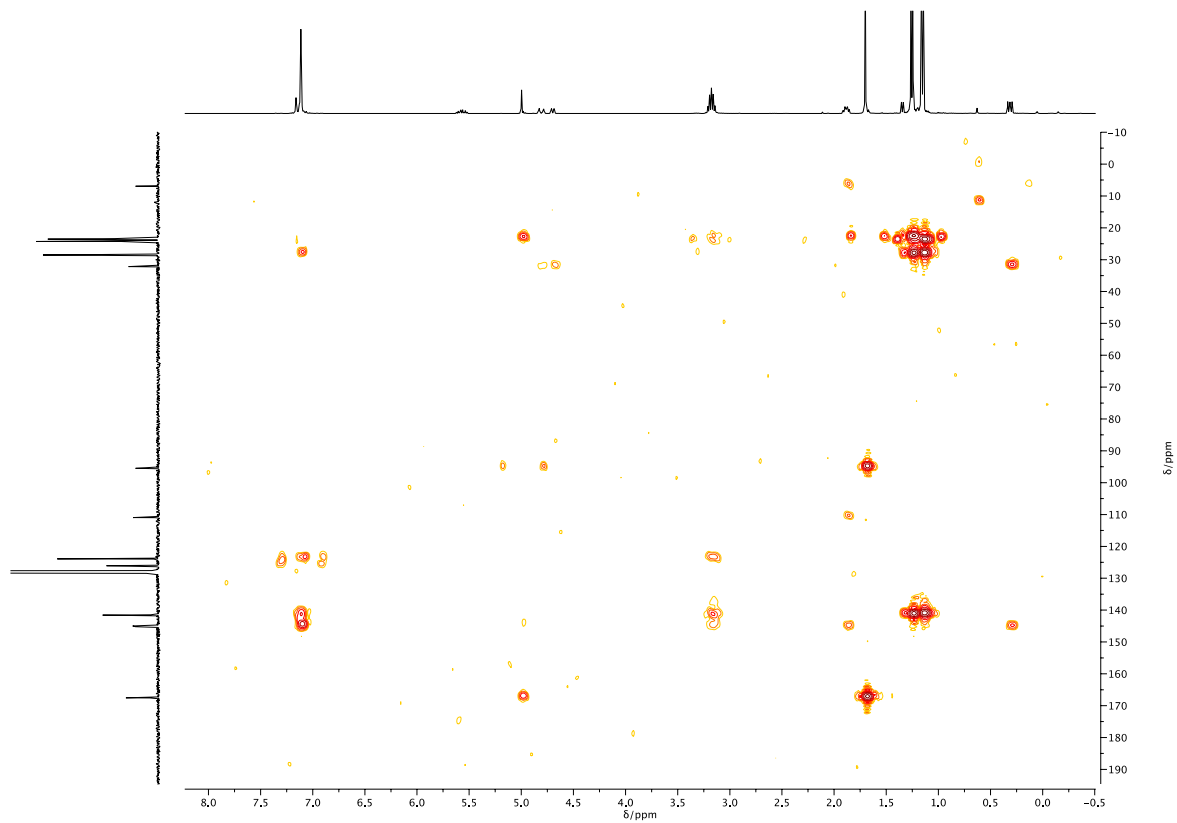

Figure S40.  $^1\text{H}$ - $^{13}\text{C}$  HMBC NMR spectrum of **7a**

## Synthesis of **8b**

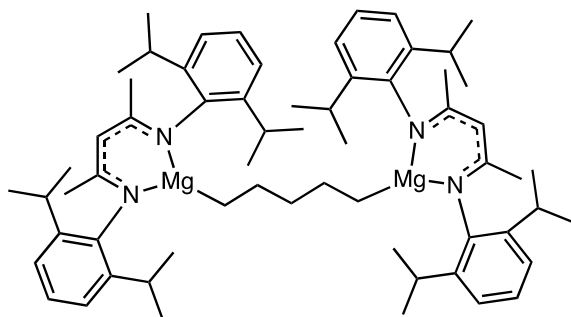

In a N<sub>2</sub> filled glovebox, a suspension of **1** (25 mg, 0.057 mmol) in C<sub>6</sub>D<sub>6</sub> (0.8 mL) was added to a J-Young NMR tube. Methylidene cyclobutene (**3b**) (2.6 μL, 2.0 mg, 0.057 mmol) was added via micropipette and the NMR tube sealed. The resulting pale-yellow solution was heated to 120 °C for 16 hours, or until the complete consumption of

**1** was observed *via* <sup>1</sup>H NMR spectroscopy. The J-Young NMR tube was returned to the glovebox, the solution diluted with toluene (0.5 mL) and decanted into a scintillation vial. The volatiles were removed in *vacuo*, leaving an off-white crystalline solid. The solid was dissolved in n-pentane (2 x 0.5 mL) and filtered. The volatiles were removed in *vacuo*, leaving **8b** as a colourless solid contaminated with **1**. All attempts to separate this mixture by crystallisation were unsuccessful. Yield: 54.0 mg.

<sup>1</sup>H NMR (400 MHz, C<sub>6</sub>D<sub>6</sub>) δ: -0.45 (t, <sup>3</sup>J<sub>H-H</sub> = 8.0 Hz, 4H, Mg-CH<sub>2</sub>), 0.60 (m, 4H, MgCH<sub>2</sub>CH<sub>2</sub>CH<sub>2</sub>), 1.07 (m, 2H, MgCH<sub>2</sub>CH<sub>2</sub>), 1.17 (d, <sup>3</sup>J<sub>H-H</sub> = 6.9 Hz, 24H, CH(CH<sub>3</sub>)<sub>2</sub>), 1.24 (d, <sup>3</sup>J<sub>H-H</sub> = 6.4 Hz, 24H, CH(CH<sub>3</sub>)<sub>2</sub>), 1.67 (s, 12H, NC(CH<sub>3</sub>)), 3.14 (sept, <sup>3</sup>J<sub>H-H</sub> = 6.6 Hz, 8H, CH(CH<sub>3</sub>)<sub>2</sub>), 4.93 (s, 2H, (CH<sub>3</sub>)C(CH)C(CH<sub>3</sub>)), 7.08-7.13 (m, 12H, Ar-H).

<sup>13</sup>C NMR (101 MHz, C<sub>6</sub>D<sub>6</sub>) δ: 6.0 (Mg-CH<sub>2</sub>), 23.5 (CH(CH<sub>3</sub>)<sub>2</sub>), 23.6 (NCCH<sub>3</sub>), 24.7 (CH(CH<sub>3</sub>)<sub>2</sub>), 28.7 (CH(CH<sub>3</sub>)<sub>2</sub>), 28.8 (MgCH<sub>2</sub>CH<sub>2</sub>), 47.4 (MgCH<sub>2</sub>CH<sub>2</sub>CH<sub>2</sub>), 95.2 ((CH)C(CH<sub>3</sub>)<sub>2</sub>), 124.0 (*para*-Ar-CH), 126.0 (*meta*-Ar-CH), 141.8 (*ortho*-Ar-C), 143.9 (*ipso*-Ar-C), 169.0 (NC(CH<sub>3</sub>)).

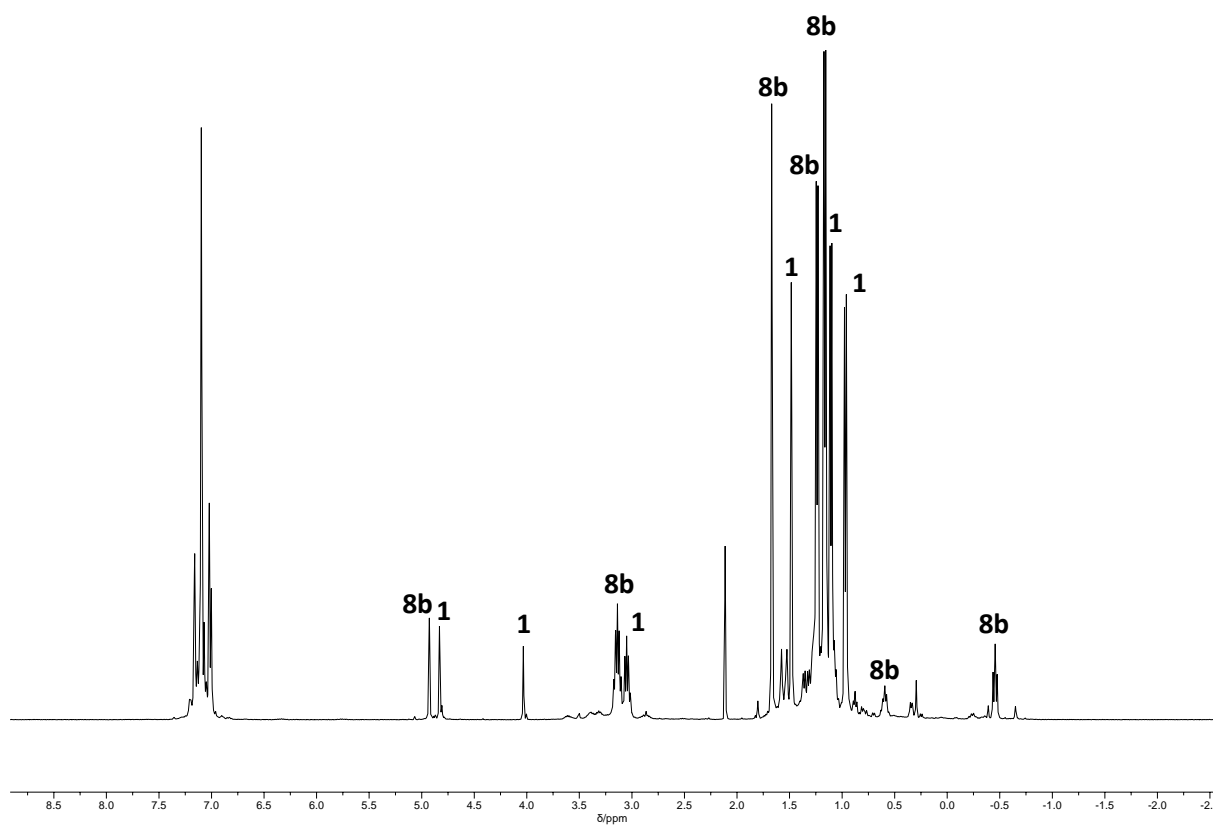

Figure S41.  $^1\text{H}$  NMR spectrum of **8b** (with **1** impurity)

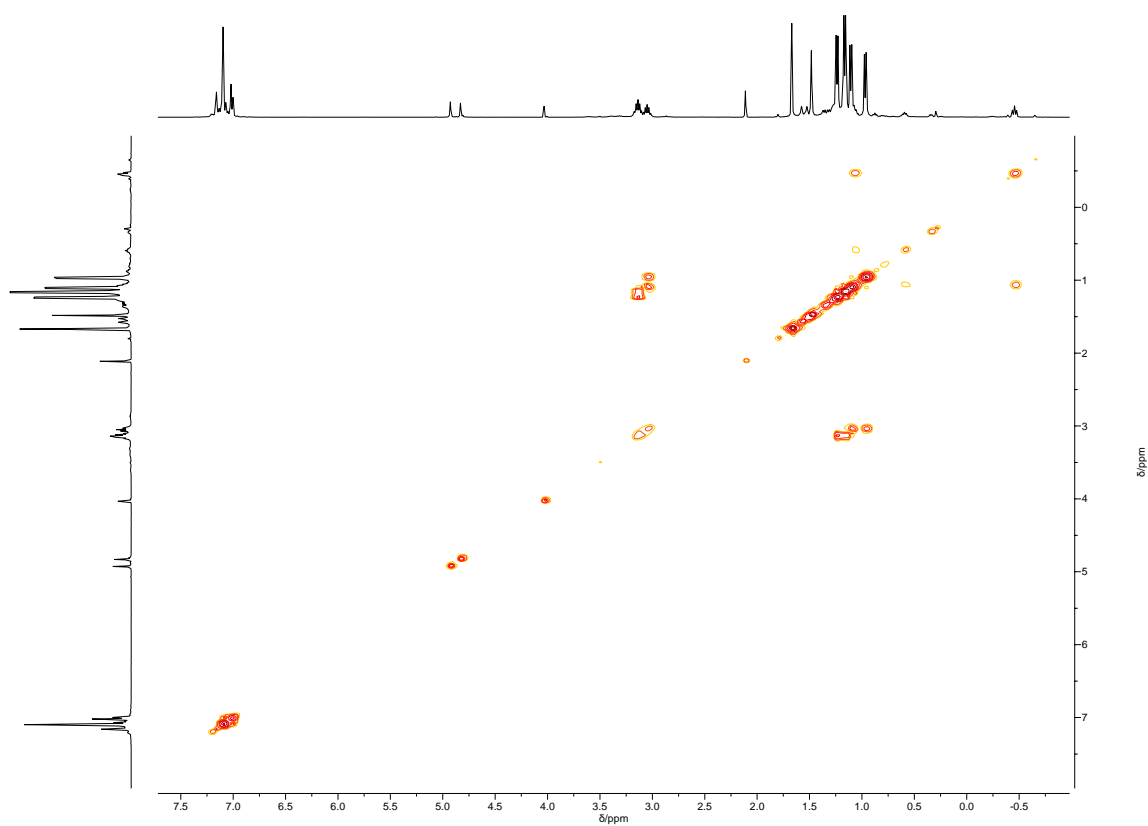

Figure S42.  $^1\text{H}$  COSY NMR spectrum of **8b** (with **1** impurity)



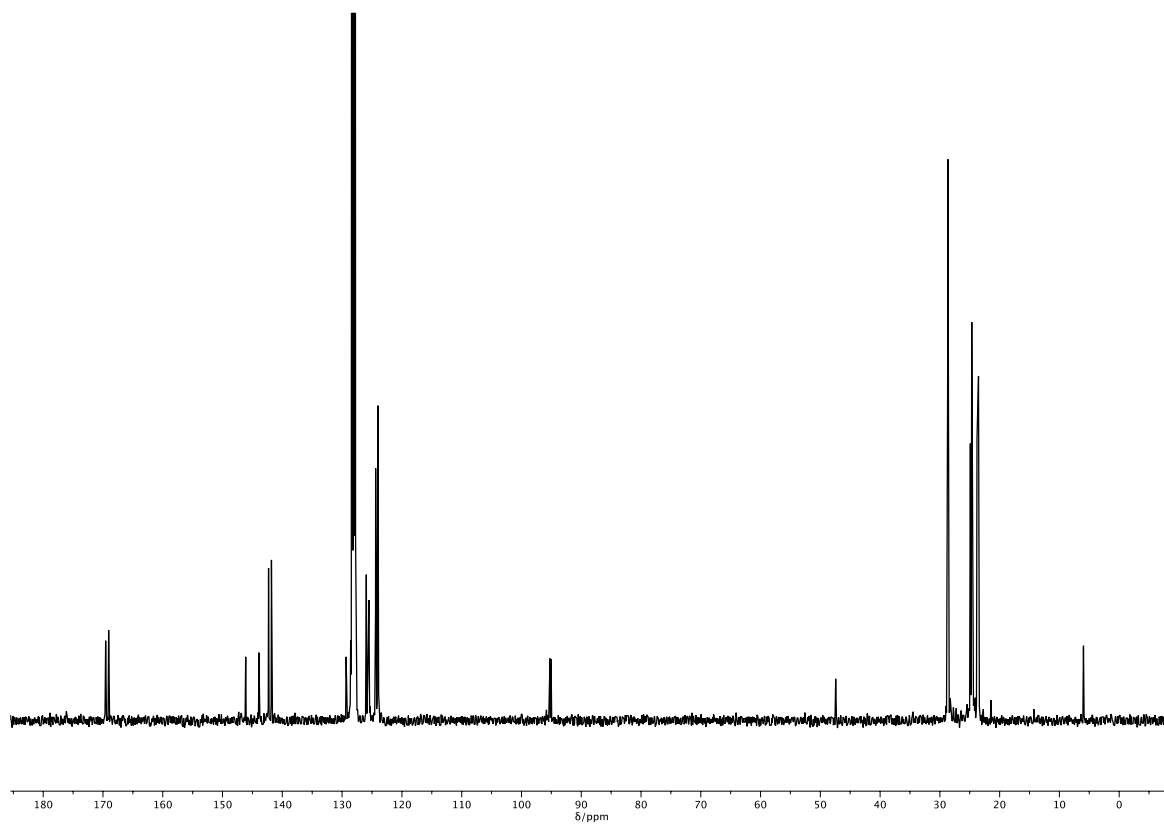

Figure S43.  $^{13}\text{C}\{^1\text{H}\}$  NMR spectrum of **8b** (with **1** impurity)

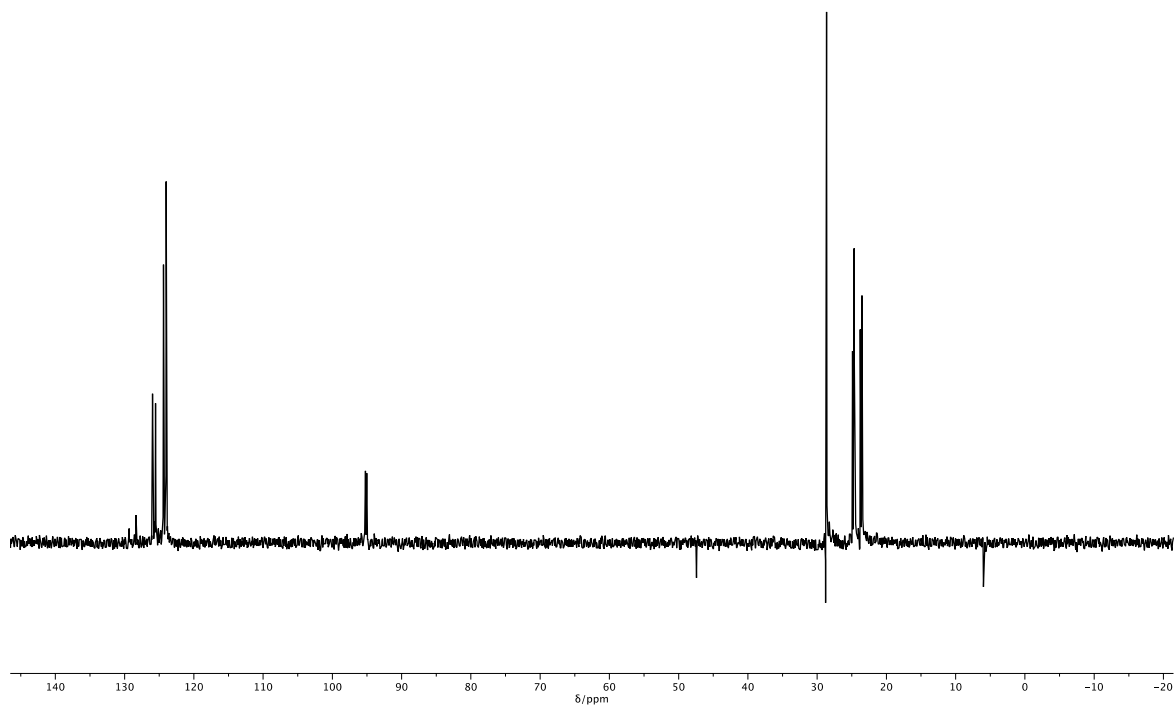

Figure S44.  $^{13}\text{C}\{^1\text{H}\}$  DEPT-135 NMR spectrum of **8b** (with **1** impurity)

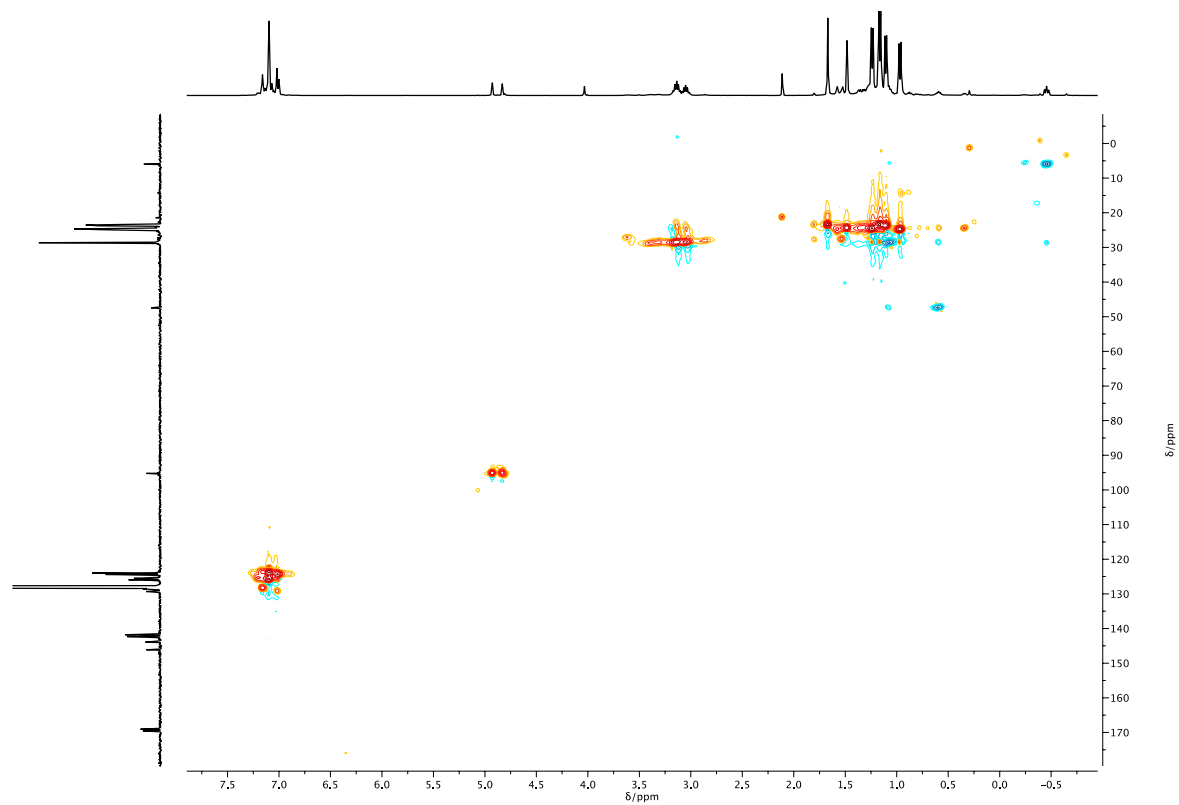

Figure S45.  $^1\text{H}$ - $^{13}\text{C}$  HSQC NMR spectrum of **8b** (with **1** impurity)

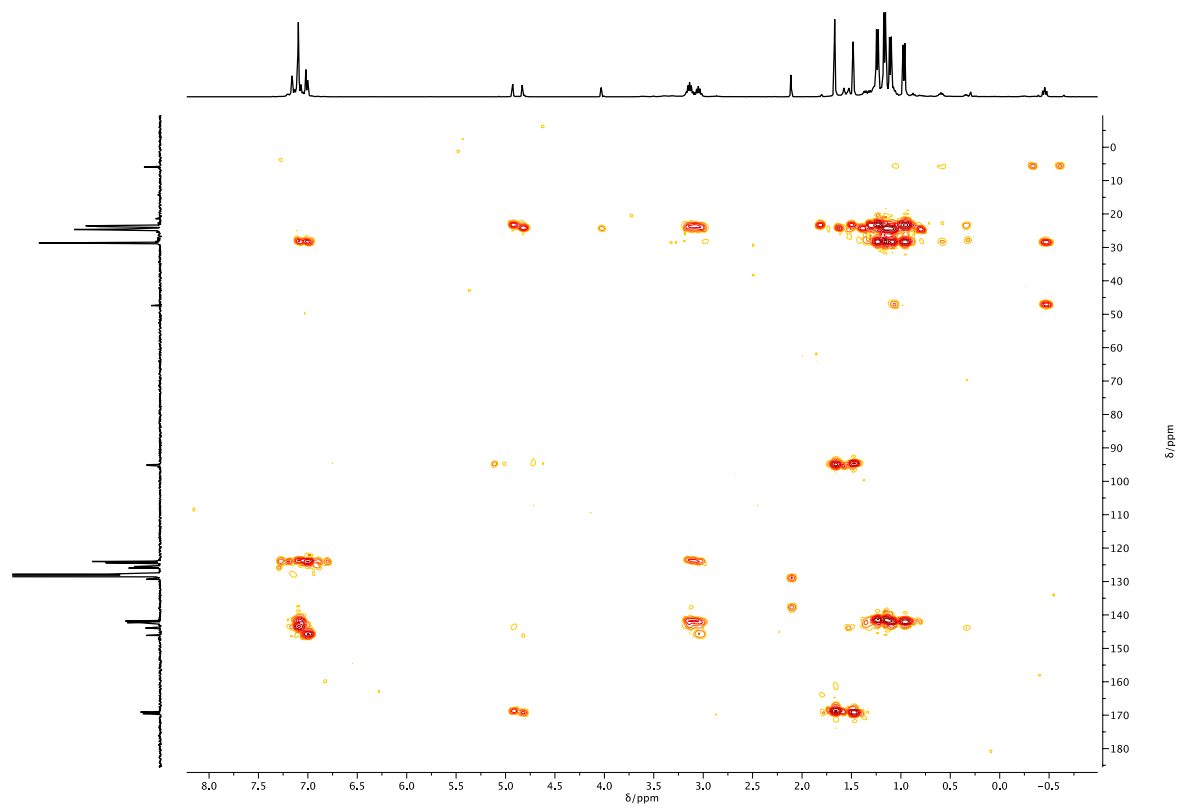

Figure S46.  $^1\text{H}$ - $^{13}\text{C}$  HMBC NMR spectrum of **8b** (with **1** impurity)

## Synthesis of **9a**

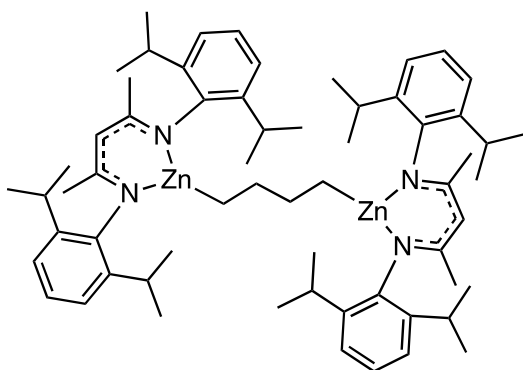

Note, **9a** can be prepared directly from **2** and **3a**, but the high volatility of **3a** (see above) makes ensuring stoichiometric control challenging. Consequently, **9a** is more conveniently prepared from **7a**.

In a N<sub>2</sub> filled glovebox, **7a** (34.5 mg, 0.064 mmol) in C<sub>6</sub>D<sub>6</sub> (0.6 mL) was added to a J-Young NMR tube. **2** (32.6 mg, 0.067 mmol) was added as a solid and the solution

heated to 100 °C for 48 hours, or until the complete consumption of **7a** was observed *via* <sup>1</sup>H NMR spectroscopy. The J-Young NMR tube was returned to the glovebox, the solution diluted with toluene (0.5 mL) and decanted into a scintillation vial. The volatiles were removed in *vacuo*, leaving an off-white crystalline solid. The solid was dissolved in n-pentane (2 x 0.5 mL) and filtered. The volatiles were removed in *vacuo*, leaving **9a** as an analytically pure white solid. Yield: 58.7 mg, 0.057 mmol, 90%.

<sup>1</sup>H NMR (400 MHz, C<sub>6</sub>D<sub>6</sub>) δ: -0.08 (m, 4H, Zn-CH<sub>2</sub>), 0.69 (m, 4H, Zn-CH<sub>2</sub>CH<sub>2</sub>), 1.15 (d, <sup>3</sup>J<sub>H-H</sub> = 6.9 Hz, 24H, CH(CH<sub>3</sub>)<sub>2</sub>), 1.19 (d, <sup>3</sup>J<sub>H-H</sub> = 7.1 Hz, 24H, CH(CH<sub>3</sub>)<sub>2</sub>), 1.69 (s, 12H, NC(CH<sub>3</sub>)), 3.13 (sept., 8H, <sup>3</sup>J<sub>H-H</sub> = 6.9 Hz, CH(CH<sub>3</sub>)<sub>2</sub>), 4.96 (s, 2H, (CH<sub>3</sub>)C(CH)<sub>2</sub>(CH<sub>3</sub>)), 7.06-7.13 (m, 12H, Ar-H).

<sup>13</sup>C NMR (101 MHz, C<sub>6</sub>D<sub>6</sub>) δ: 7.0 (Zn-CH<sub>2</sub>), 23.4 (NC(CH<sub>3</sub>)), 23.6 (CH(CH<sub>3</sub>)<sub>2</sub>), 24.3 (CH(CH<sub>3</sub>)<sub>2</sub>), 28.5 (CH(CH<sub>3</sub>)<sub>2</sub>), 34.7 (ZnCH<sub>2</sub>CH<sub>2</sub>), 95.2 ((CH<sub>3</sub>)C(CH)<sub>2</sub>(CH<sub>3</sub>)), 123.7 (*meta*-Ar-CH), 125.8 (*para*-Ar-CH), 141.5 (*ortho*-Ar-C), 145.1 (*ipso*-Ar-C), 167.1 (NC(CH<sub>3</sub>)).

FT-IR (cm<sup>-1</sup>): 3060, 2956, 2922, 2900, 2864, 1808, 1548, 1523, 1457, 1434, 1381, 1359, 1317, 1266, 1234, 1180, 1098, 1057, 1027, 1019, 934, 859, 792, 757, 718, 704, 634, 527, 447, 434.

Anal. Calcd. (C<sub>62</sub>H<sub>90</sub>N<sub>4</sub>Zn<sub>2</sub>): C, 72.85; H, 8.88; N, 5.48. Found: C, 72.88; H, 8.95; N, 5.37.

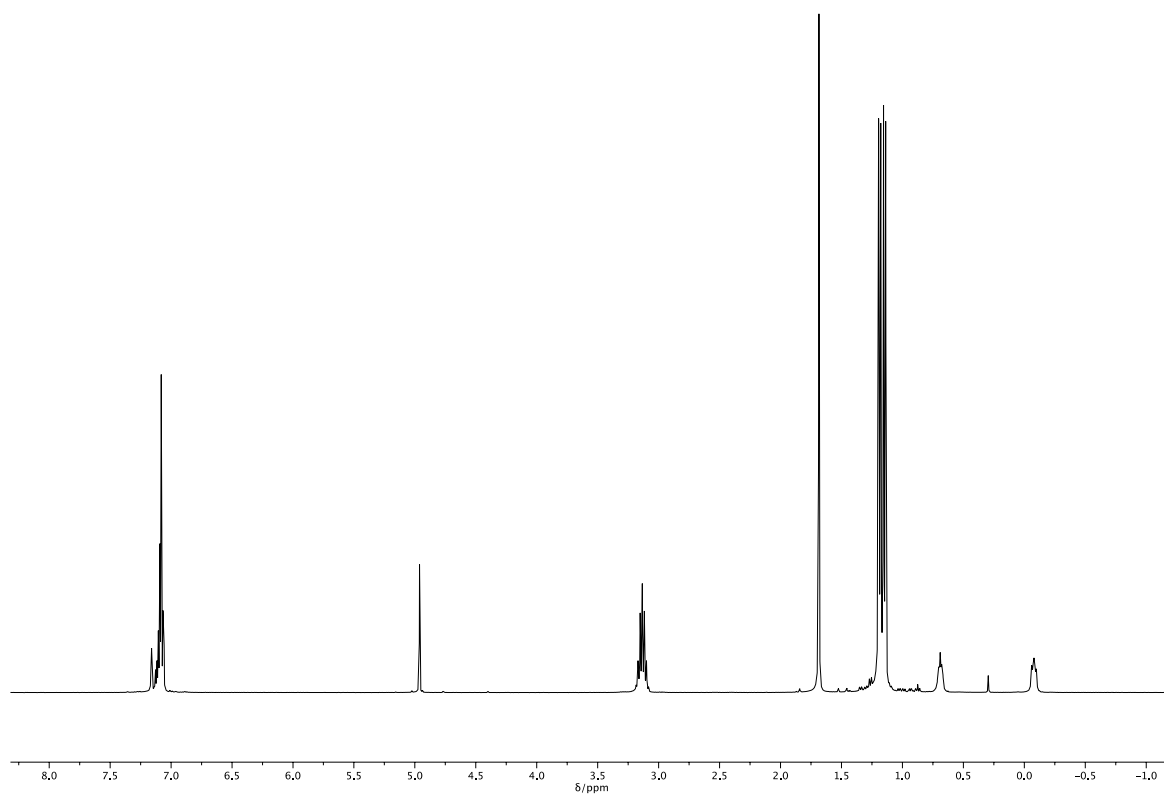

Figure S47. <sup>1</sup>H NMR spectrum of 9a

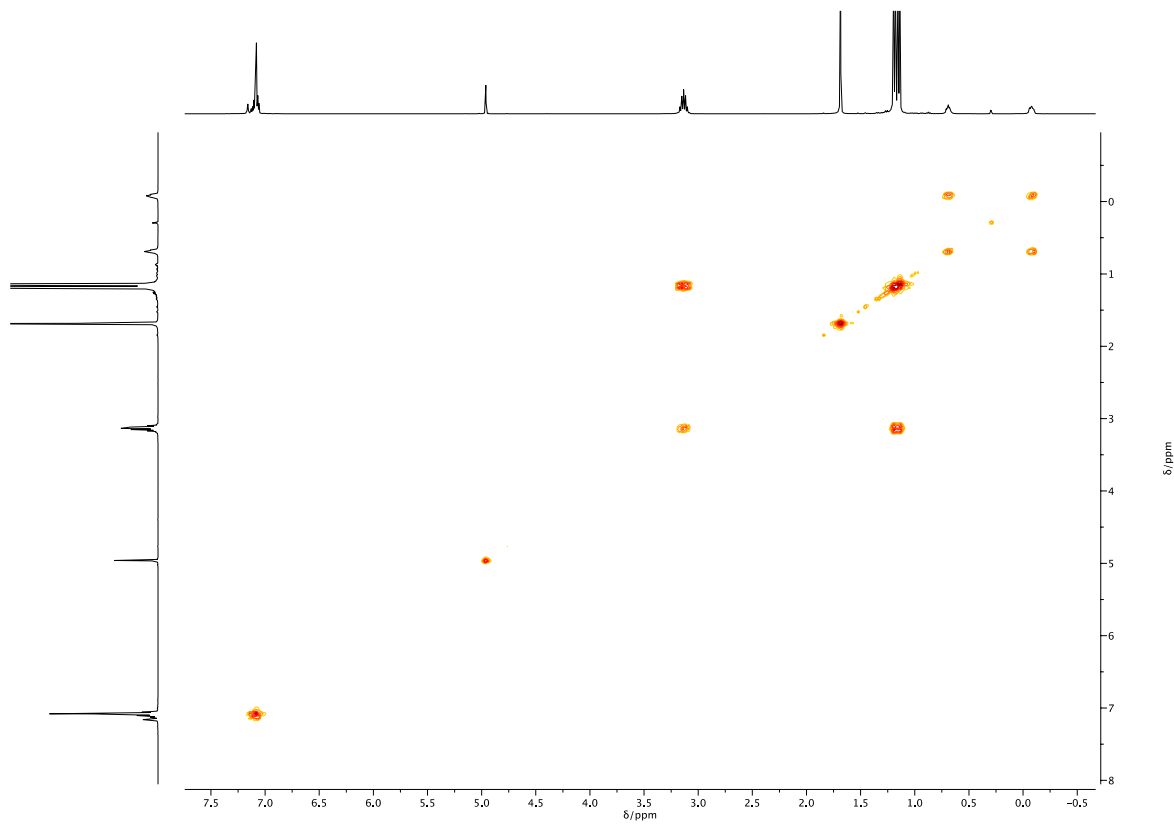

Figure S48. <sup>1</sup>H COSY NMR spectrum of 9a

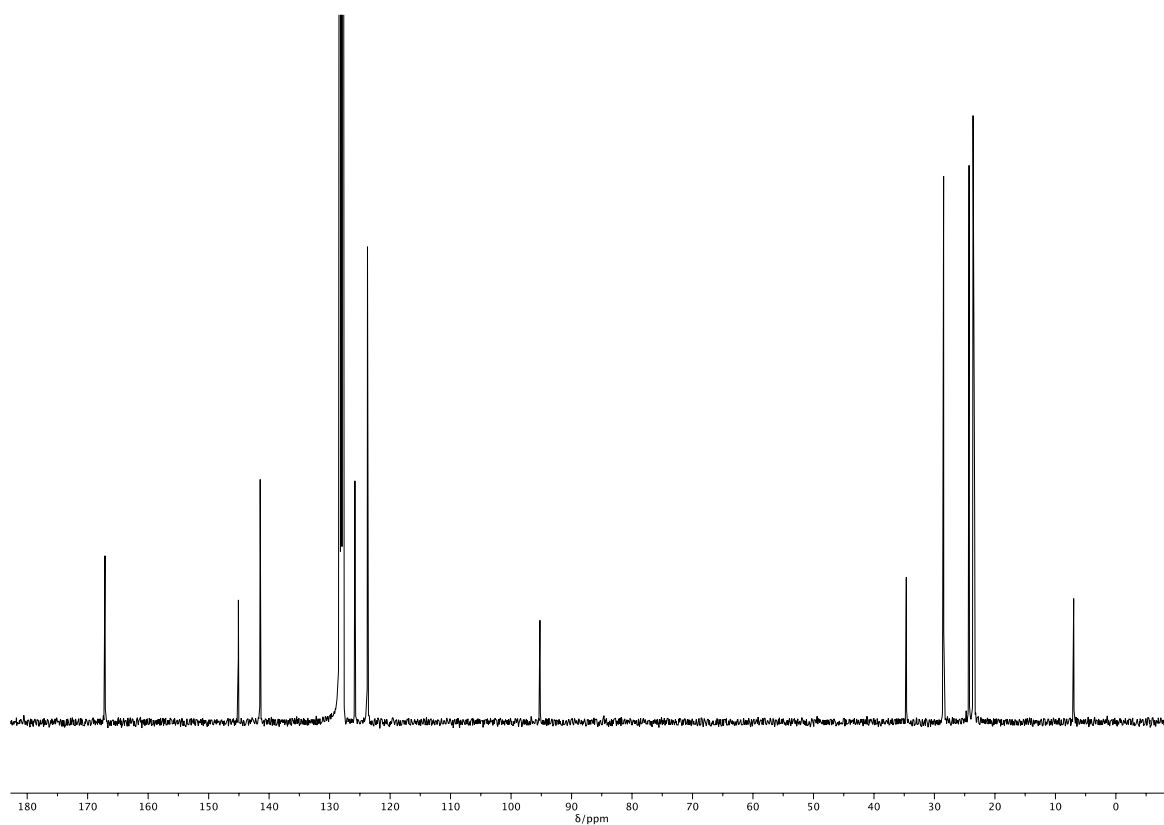

Figure S49.  $^{13}\text{C}\{^1\text{H}\}$  NMR spectrum of 9a

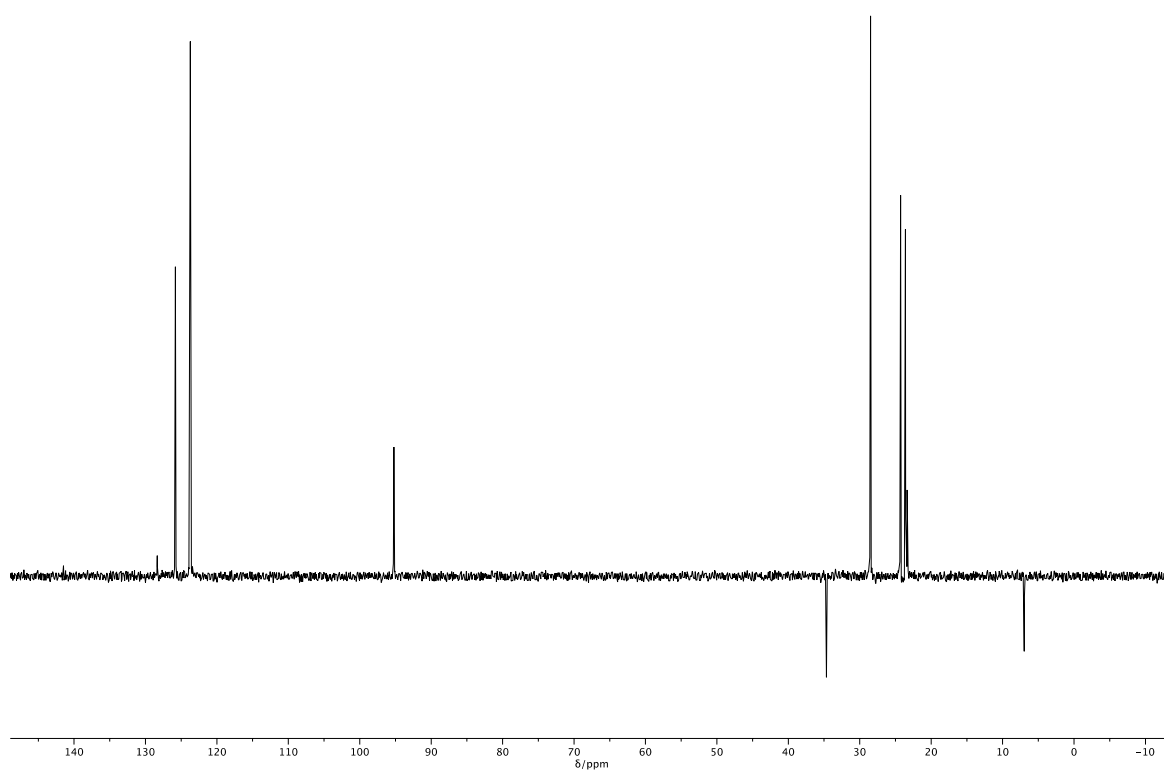

Figure S50.  $^{13}\text{C}\{^1\text{H}\}$  DEPT-135 NMR spectrum of 9a

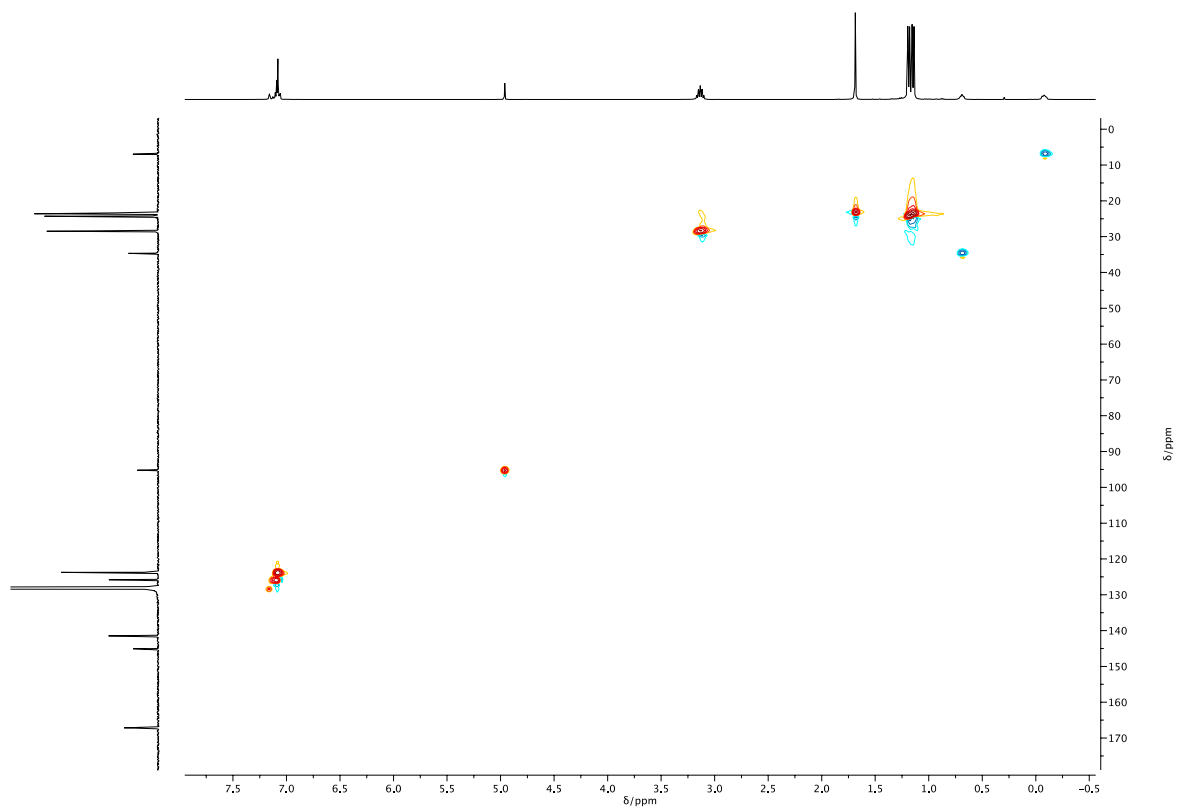

Figure S51.  $^1\text{H}$ - $^{13}\text{C}$  HSQC NMR spectrum of **9a**

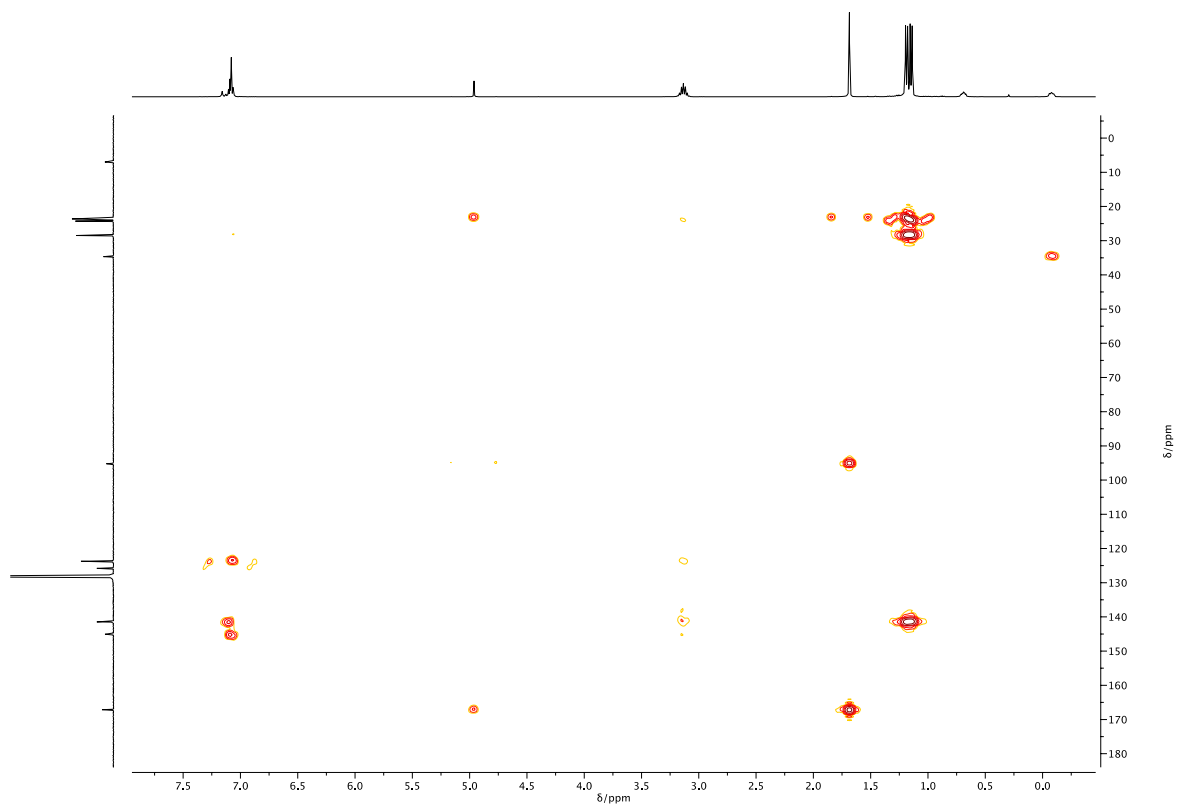

Figure S52.  $^1\text{H}$ - $^{13}\text{C}$  HMBC NMR spectrum of **9a**

### Labelling reaction

A labelling study was carried out between the deuterated analogue of **1** with selective deuteration of the Mg–H group (**1-d**) and the most reactive alkylidene **3a** to determine the regioselectivity of the hydrometallation step. In a N<sub>2</sub> filled glovebox, a suspension of **1-d** (85% D-incorporated, 5.5 mg, 0.012 mmol) in C<sub>6</sub>D<sub>6</sub> or C<sub>6</sub>H<sub>6</sub> (0.6 mL) was added to a J-Young NMR tube. Methylidene cyclopropane (**3a**) was added in excess using a pre-cooled pipette and the NMR tube sealed. The resulting colourless solutions were monitored by <sup>1</sup>H (C<sub>6</sub>D<sub>6</sub>) and <sup>2</sup>H (C<sub>6</sub>H<sub>6</sub>) NMR spectroscopy over 24 h at room temperature. The <sup>2</sup>H NMR spectrum of the reaction mixture after 24 h in C<sub>6</sub>H<sub>6</sub> showed only one non-solvent resonance at 5.64 ppm (Figure S53), which corresponds perfectly to that observed for the internal alkene CH in the previously reported protio analogue.<sup>3</sup> The reaction in C<sub>6</sub>D<sub>6</sub> was worked up as for other samples: the J-Young NMR tube was returned to the glovebox, the solution diluted with toluene (0.5 mL) and decanted into a scintillation vial. The volatiles were removed in *vacuo*, leaving an off-white solid. The solid was dissolved in n-pentane (1 mL) and filtered. The volatiles were removed in *vacuo*. <sup>1</sup>H NMR analysis of this product in C<sub>6</sub>D<sub>6</sub> show that all the resonances for **6a** are observed with quantitative integrations, except the resonance for the internal alkene CH which is observed with *ca.* 15% intensity, due to a 15% protio impurity of **1** in **1-d** (Figure S54).

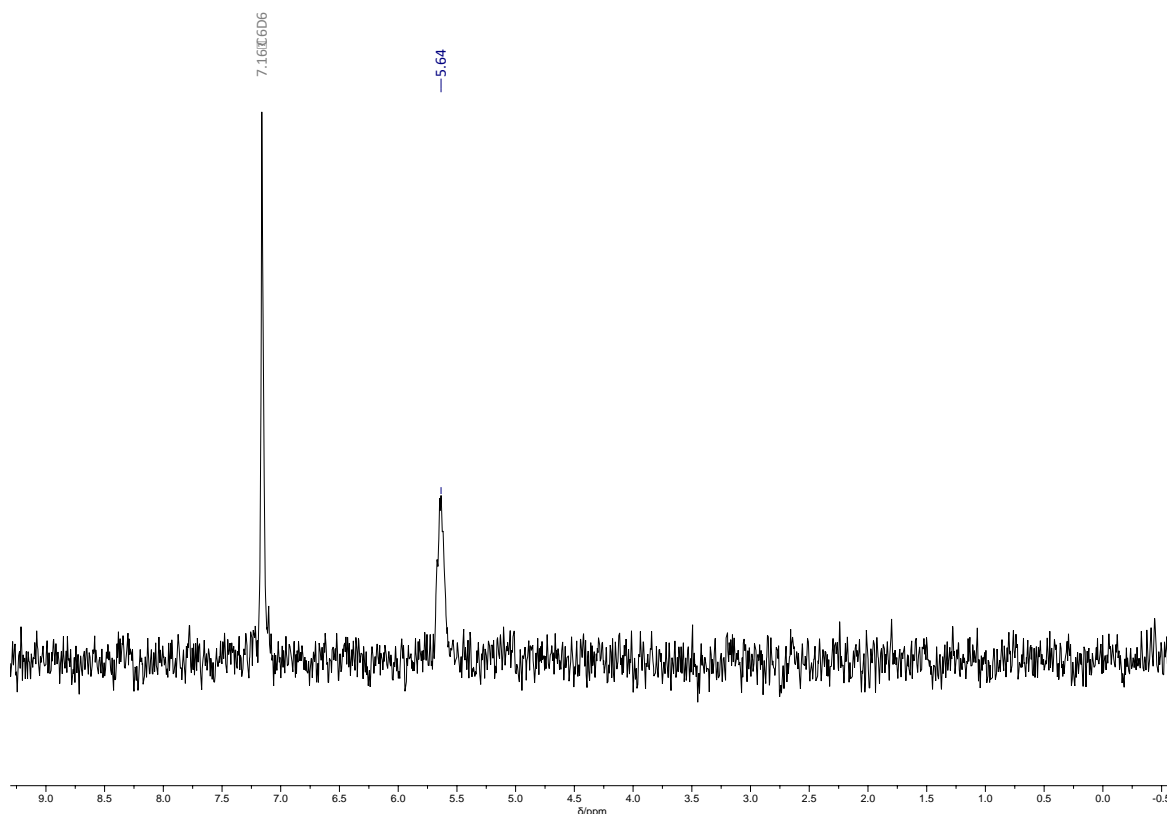

**Figure S53.** <sup>2</sup>H NMR spectrum of reaction between **1-d** and **3a** after 24 h at room temperature

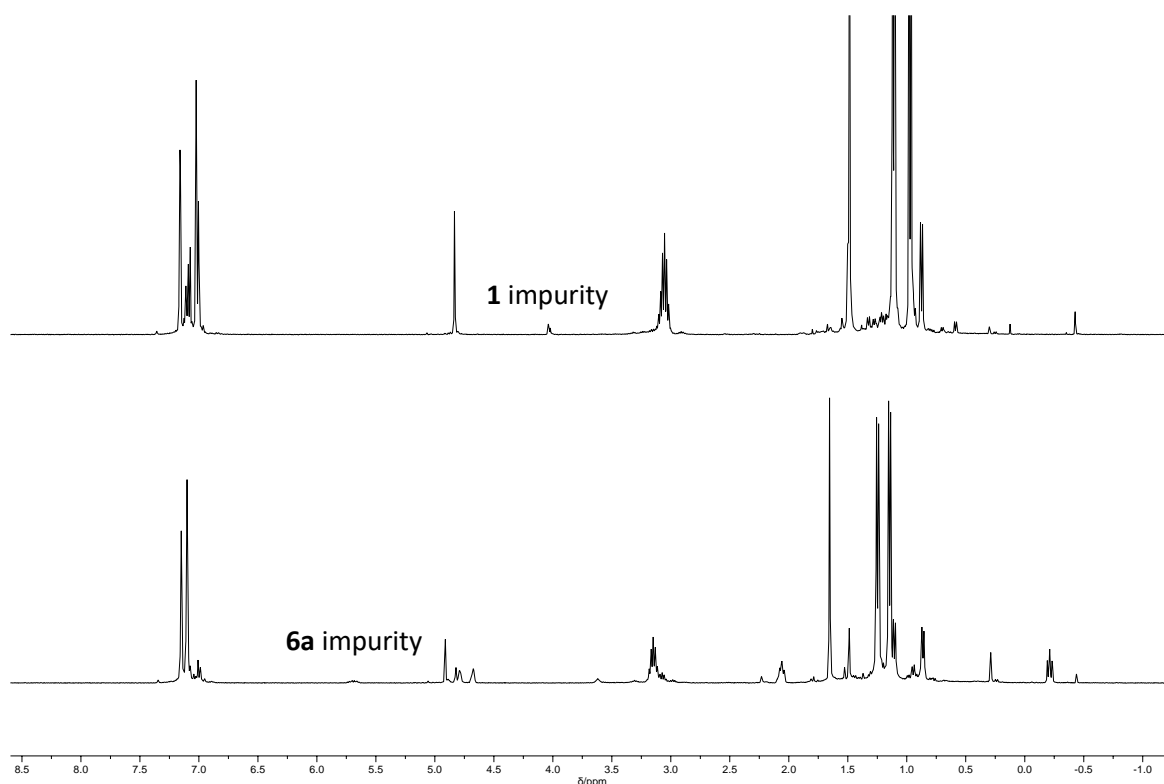

**Figure S54.** Stacked  $^1\text{H}$  NMR spectra showing **1-d** with 15% **1** impurity (top) and isolated deuterated analogue of **6a** (bottom)

### **Catalytic hydrosilylation with magnesium**

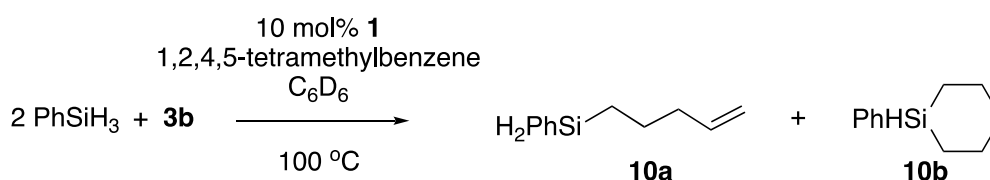

**Catalytic hydrosilylation of 3b:** In a glovebox, **1** (20 mg, 0.045 mmol), **3b** (30.7 mg, 41.6  $\mu\text{L}$ , 0.45 mmol), and  $\text{PhSiH}_3$  (111  $\mu\text{L}$ , 0.90 mmol) were dissolved in  $\text{C}_6\text{D}_6$  (0.6 mL) and transferred to a J-Young NMR tube. 1,2,4,5-tetramethylbenzene (6.0 mg, 0.045 mmol) was added as an internal standard. The tube was sealed, removed from the glovebox, and heated to 100  $^\circ\text{C}$  in an oil bath. The reaction was monitored at regular intervals by  $^1\text{H}$  NMR spectroscopy. Upon complete consumption of **3b**, the tube was returned to the glovebox and the volatiles removed *in vacuo*. The resulting off-white oil was dissolved in n-pentane (3 x 0.5 mL) and filtered, removing the catalyst **1**. The volatiles removed *in vacuo*. The yellow oil was removed from the glovebox and subjected to NMR and TLC analysis, showing a mixture of desired product 1-phenyl-1-silacyclohexane (**10b**) and unreacted phenyl silane. **10b** was readily isolated by column chromatography (silica gel, hexanes,  $R_f = 0.4$ ) and NMR spectra in  $\text{CDCl}_3$  matches literature values (65.8 mg, 0.037 mmol, 83 %).<sup>5,6</sup>



| Time (h) | <b>3b</b> (%) | <b>10a</b> (%) | <b>10b</b> (%) |
|----------|---------------|----------------|----------------|
| 1        | 94            | 5              | 1              |
| 3        | 74            | 12             | 7              |
| 4        | 70            | 14             | 12             |
| 5.5      | 63            | 16             | 20             |
| 7        | 58            | 15             | 27             |
| 10       | 46            | 13             | 39             |
| 13.5     | 36            | 8              | 49             |
| 17       | 27            | 7              | 56             |
| 19       | 23            | 6              | 66             |
| 21       | 21            | 4              | 69             |
| 25       | 18            | 4              | 74             |
| 28       | 16            | 2              | 80             |
| 33       | 9             | 1              | 84             |
| 36       | 8             | 1              | 89             |
| 42       | 5             | 1              | 89             |
| 50       | 0             | <1             | 95             |

**Table S1.** Catalytic hydrosilylation of **3b** using **1** at 100 °C. Percentage yield calculated by integration of <sup>1</sup>H NMR spectra against internal standard.

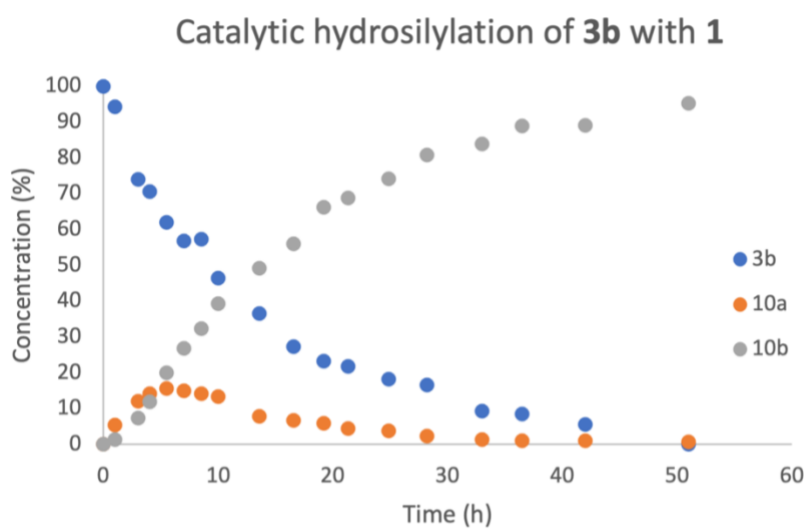

**Figure S55.** Catalytic hydrosilylation of **3b** using **1** at 100 °C. Percentage yield calculated by integration of <sup>1</sup>H NMR spectra against internal standard.

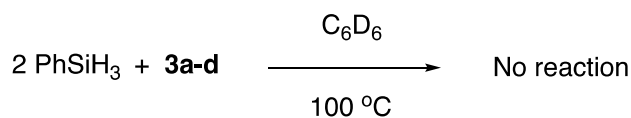

**Control reactions of 3a-d with phenylsilane:** In a glovebox, **3a-d** (0.04 mmol) and PhSiH<sub>3</sub> (5 μL, 0.04 mol) were dissolved in C<sub>6</sub>D<sub>6</sub> (0.600 mL) and transferred to a J-Young NMR tube. The tube was sealed and removed from the glovebox. An initial <sup>1</sup>H NMR spectrum was taken at this timepoint. The reaction mixture was heated at 100 °C in an oil bath for 24 h and a second <sup>1</sup>H NMR spectrum was taken at this point. No reaction between **3a-d** and PhSiH<sub>3</sub> was observed.

### ***Hydrosilylation with zinc***

In a glovebox, **2** (21.8 mg, 0.045 mmol) and 1,2,4,5-tetramethylbenzene (6.0 mg, 0.045 mmol) were dissolved in C<sub>6</sub>D<sub>6</sub> (0.6 mL) in a J-Young NMR tube and shaken to ensure complete dissolution. PhSiH<sub>3</sub> (111 μL, 0.90 mmol) was added and the solution was frozen at -35 °C. **3a** was added cold (-35 °C) to the still frozen solution in the cold tube using a pre-cooled pipette. Although 30.4 μL was attempted to be added, the extremely high volatility of **3a** makes this challenging. <sup>1</sup>H NMR spectra of the reaction mixture can be used to quantify the ratio of **3a** : PhSiH<sub>3</sub> : **2**. **3a** was added until this ratio was found to be 1 : 1.42 : 0.10. This means the reaction mixture contained 1 equiv. **3a**, 1.4 equiv. PhSiH<sub>3</sub> and 10.5 mol % **2**. The mixture was subsequently heated to 100 °C for a total of 48 h and monitored by <sup>1</sup>H NMR spectroscopy:

- An initial rapid drop in **3a** (31% remaining after 1 h) and then a slow further decline (16% remaining after 48 h)
- An initial rapid drop in PhSiH<sub>3</sub> (54% remaining after 1 h) and then a slow further decline (32% remaining after 48 h)
- A sharp increase in linear silane product analogous to **10a** (8% after 1 h) which plateaus after *ca.* 3 h at 10% (NB. this is approximately 1 turnover as loading of **2** is 10.5–11.2 mol %), over 48 h this has increased to 14%.

The NMR resonances derived from the linear silane product were identified from previous reports.<sup>3</sup>

| Time (h) | <b>3a</b> (%) | PhSiH <sub>3</sub> (%) | Linear silane (%) |
|----------|---------------|------------------------|-------------------|
| 0        | 100           | 100                    | 0.7               |
| 1        | 31.0          | 53.7                   | 8.2               |
| 2        | 34.3          | 48.8                   | 9.6               |
| 3        | 31.4          | 46.4                   | 10.2              |
| 5        | 29.9          | 43.7                   | 10.9              |
| 8        | 23.2          | 39.4                   | 12.3              |
| 12       | 23.6          | 38.8                   | 12.3              |
| 16       | 24.7          | 37.8                   | 13.0              |
| 20       | 22.5          | 35.2                   | 13.6              |
| 25       | 21.8          | 35.2                   | 13.6              |
| 30       | 17.3          | 34.1                   | 13.6              |
| 48       | 16.2          | 32.1                   | 14.3              |

**Table S2.** Hydrosilylation of **3a** using **2** at 100 °C. Percentage yield calculated by integration of <sup>1</sup>H NMR spectra against internal standard.

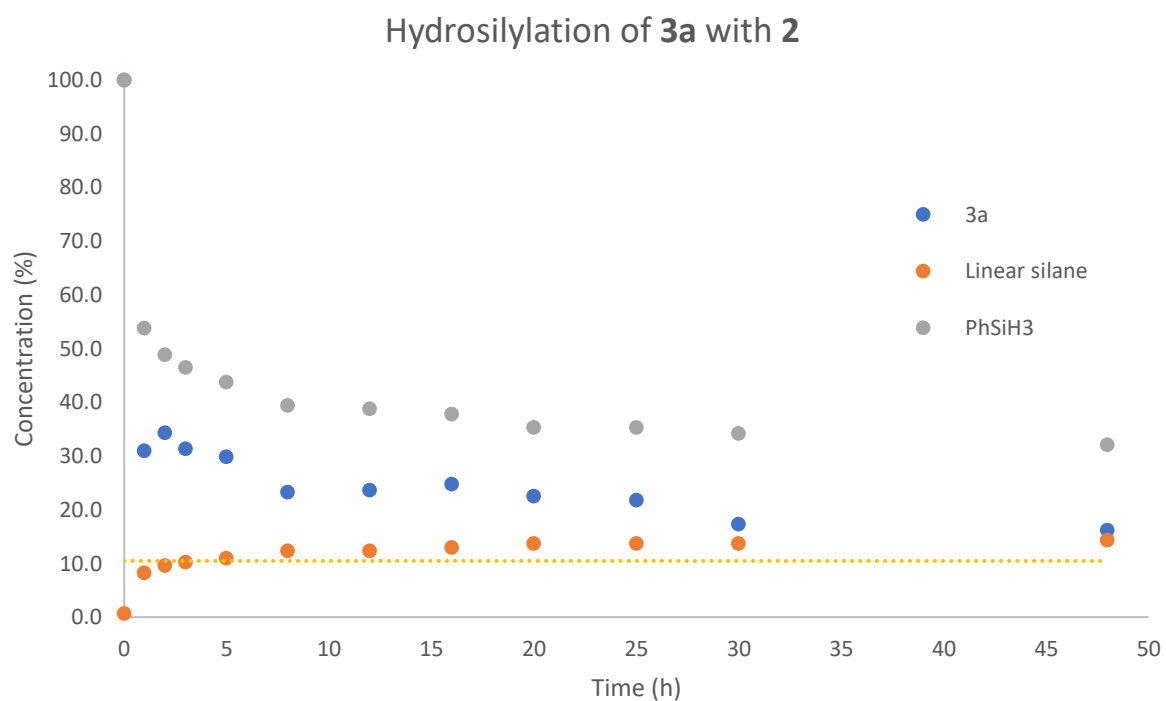

**Figure S56.** Hydrosilylation of **3a** using **2** at 100 °C. Percentage yield calculated by integration of <sup>1</sup>H NMR spectra against internal standard.

## Kinetics

In a N<sub>2</sub> filled glovebox, **1** (40 mg, 0.090 mmol), **3c** (74.3 mg, 95.2 μL, 0.45 mmol), and 1,2,4,5-tetramethyl benzene (12.1 mg, 0.090 mmol; internal standard) were dissolved in C<sub>6</sub>D<sub>6</sub> (3.0 mL) in a small vial. The solution was aliquoted into four J-Young tap NMR tubes (4 x 0.6 mL). The tubes were quickly sealed and stored in the glovebox freezer at -35 °C. The tubes were warmed to room temperature and immediately inserted into a pre-heated spectrometer (70 – 100 °C). The reaction was monitored by <sup>1</sup>H NMR spectroscopy and known resonances integrated against the internal standard. Four rate constants were determined in the temperature range of 70 to 100 °C and a plot of ln(k<sub>obs</sub>) against 1/T allowed calculation of the thermodynamic parameters using the Eyring equation. Data was plotted to 2 half-lives. Standard errors were calculated using regression analysis in the Microsoft Excel program.  $\Delta H^\ddagger = 15.0 \pm 2.0 \text{ kcal mol}^{-1}$ ,  $\Delta S^\ddagger = -34.4 \pm 14.7 \text{ cal K}^{-1} \text{ mol}^{-1}$  and an associated  $\Delta G^\ddagger(298\text{K}) = 25.2 \pm 2.0 \text{ kcal mol}^{-1}$ .

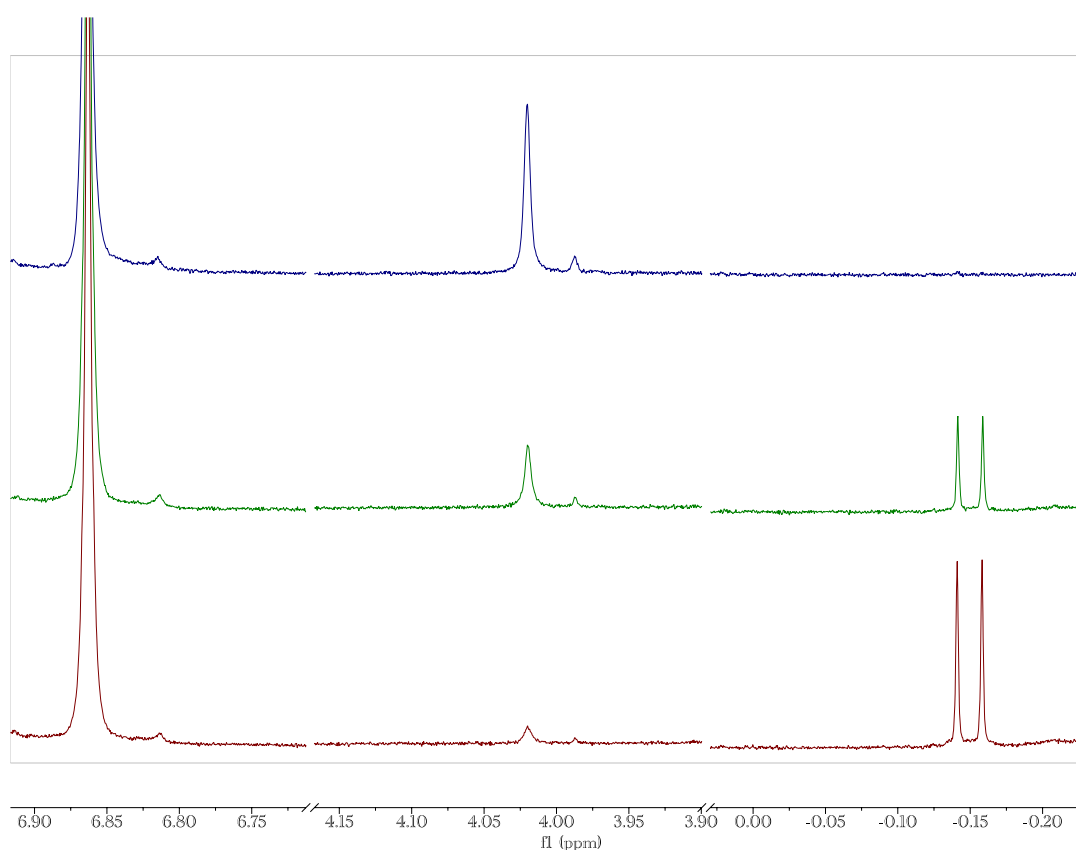

**Figure S57.** Representative example of <sup>1</sup>H NMR spectra for kinetic experiment. Showing t = 0 (top, blue), t = end (bottom, red) and t = intermediate timepoint (middle, green).

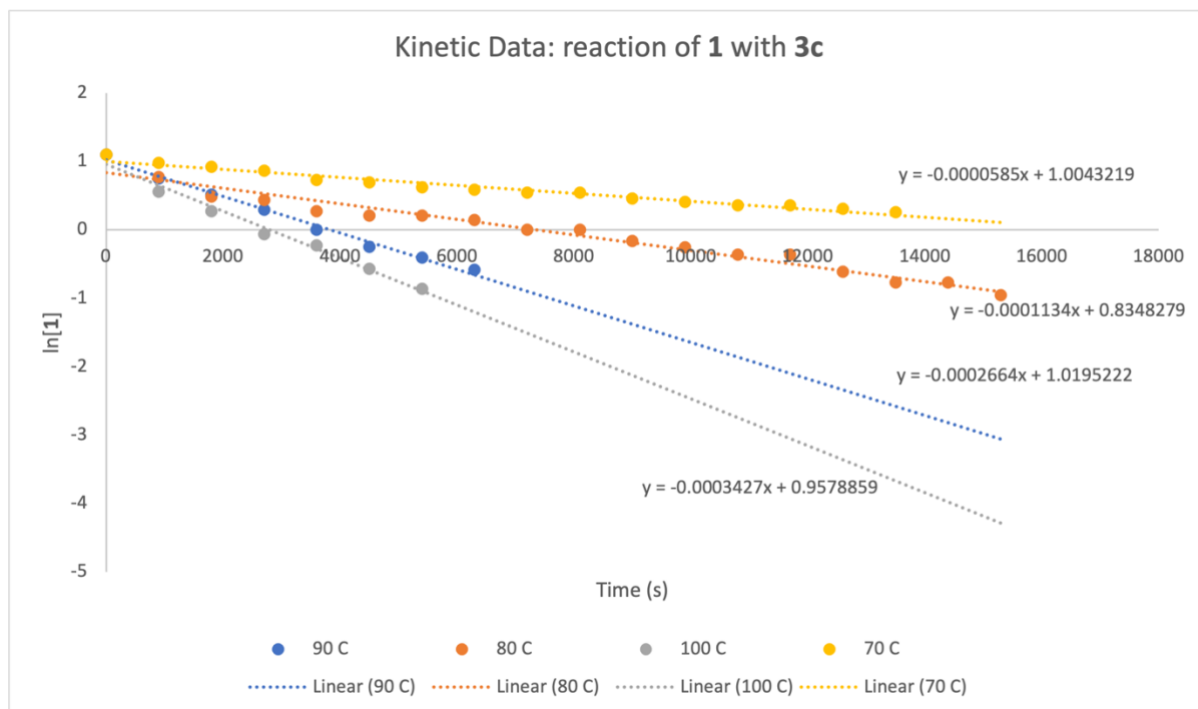

**Figure S58.** Kinetic data for the transformation of **1** to **4c** at 70 – 100 °C.

| Temperature (K) | 1/T     | k (s <sup>-1</sup> ) | ln(k/T) |
|-----------------|---------|----------------------|---------|
| 343             | 0.00291 | 0.0000585            | -15.585 |
| 353             | 0.00283 | 0.000113             | -14.952 |
| 363             | 0.00275 | 0.000266             | -14.125 |
| 373             | 0.00270 | 0.000343             | -13.901 |

**Table S3.** Table of rate constants derived from kinetic experiments

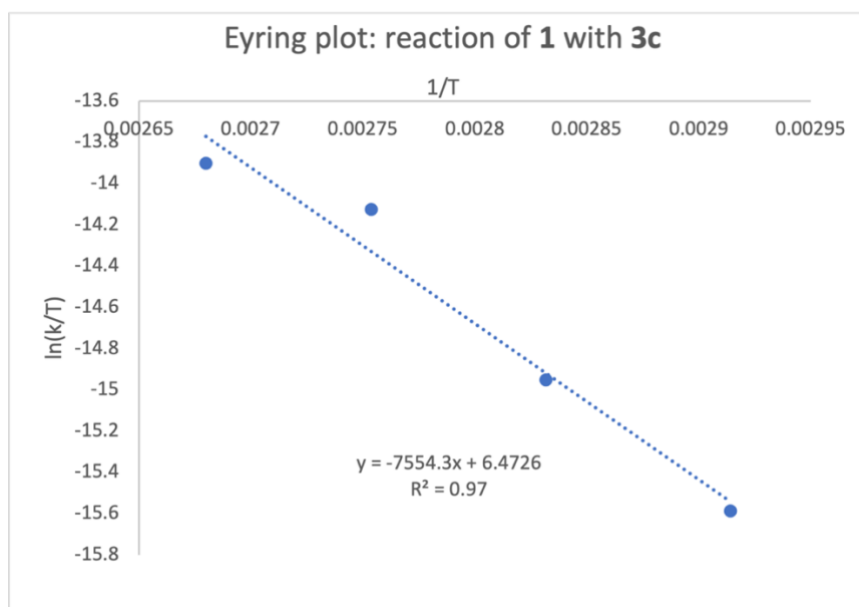

**Figure S59.** Eyring plot of data from Table S2.

### 3. X-ray Crystallography

Table S4 provides a summary of the crystallographic data for the structures of **5b**, **5c**, **7a** and **9a**. Data were collected using an Agilent Xcalibur PX Ultra A diffractometer, and the structures were solved and refined using the OLEX2,<sup>7</sup> SHELXTL<sup>8</sup> and SHELX-2013<sup>9</sup> program systems. CCDC 2211702–2211705.

| data                                                                    | <b>5b</b>                                         | <b>5c</b>                                         | <b>7a</b>                                         | <b>9a</b>                                                      |
|-------------------------------------------------------------------------|---------------------------------------------------|---------------------------------------------------|---------------------------------------------------|----------------------------------------------------------------|
| formula                                                                 | C <sub>34</sub> H <sub>50</sub> N <sub>2</sub> Zn | C <sub>35</sub> H <sub>52</sub> N <sub>2</sub> Zn | C <sub>33</sub> H <sub>48</sub> N <sub>2</sub> Zn | C <sub>62</sub> H <sub>90</sub> N <sub>4</sub> Zn <sub>2</sub> |
| solvent                                                                 | –                                                 | –                                                 | –                                                 | –                                                              |
| formula weight                                                          | 552.13                                            | 566.15                                            | 538.10                                            | 1022.11                                                        |
| colour, habit                                                           | colourless blocks                                 | colourless block                                  | colourless blocks                                 | colourless blocks                                              |
| temperature / K                                                         | 173                                               | 173                                               | 173                                               | 173                                                            |
| crystal system                                                          | orthorhombic                                      | monoclinic                                        | monoclinic                                        | triclinic                                                      |
| space group                                                             | Pbca                                              | P12 <sub>1</sub> /n1                              | P12 <sub>1</sub> /n1                              | P-1                                                            |
| <i>a</i> / Å                                                            | 15.0449(2)                                        | 11.2164(3)                                        | 10.7471(7)                                        | 12.4022(4)                                                     |
| <i>b</i> / Å                                                            | 16.2449(2)                                        | 20.8079(5)                                        | 21.2654(8)                                        | 15.9790(4)                                                     |
| <i>c</i> / Å                                                            | 26.5593(3)                                        | 14.1171(4)                                        | 13.8275(7)                                        | 31.6956(7)                                                     |
| $\alpha$ / deg                                                          | 90                                                | 90                                                | 90                                                | 83.997(2)                                                      |
| $\beta$ / deg                                                           | 90                                                | 96.264(2)                                         | 93.143(4)                                         | 93.924(2)                                                      |
| $\gamma$ / deg                                                          | 90                                                | 90                                                | 90                                                | 68.783(2)                                                      |
| <i>V</i> / Å <sup>3</sup>                                               | 6491.17(14)                                       | 3275.11(15)                                       | 3155.4(3)                                         | 5807.7(3)                                                      |
| <i>Z</i>                                                                | 8                                                 | 4                                                 | 4                                                 | 4                                                              |
| <i>D<sub>c</sub></i> / g cm <sup>-3</sup>                               | 1.130                                             | 1.148                                             | 1.133                                             | 1.169                                                          |
| radiation used                                                          | Cu-K $\alpha$                                     | Cu-K $\alpha$                                     | Cu-K $\alpha$                                     | Cu-K $\alpha$                                                  |
| $\mu$ / mm <sup>-1</sup>                                                | 1.199                                             | 1.199                                             | 0.800                                             | 1.302                                                          |
| no. of unique reflns                                                    |                                                   |                                                   |                                                   |                                                                |
| measured ( <i>R</i> <sub>int</sub> )                                    | 6480 (0.0319)                                     | 6283 (0.0309)                                     | 6567 (0.0366)                                     | 22157 (0.0281)                                                 |
| obs,   <i>F</i> <sub>o</sub>   > 4 $\sigma$ (  <i>F</i> <sub>o</sub>  ) | 5624                                              | 4761                                              | 4907                                              | 17283                                                          |
| completeness (%) [a]                                                    | 100                                               | 98.6                                              | 99.7                                              | 98.4                                                           |
| no. of variables                                                        | 344                                               | 374                                               | 347                                               | 1284                                                           |
| <i>R</i> <sub>1</sub> (obs), <i>wR</i> <sub>2</sub> (all) [b]           | 0.0352, 0.1009                                    | 0.0791, 0.2418                                    | 0.0457, 0.1399                                    | 0.0426, 0.1232                                                 |
| CCDC code                                                               | 2211702                                           | 2211703                                           | 2211704                                           | 2211705                                                        |

[a] Completeness to 0.84 Å resolution. [b]  $R_1 = \sum ||F_o| - |F_c|| / \sum |F_o|$ ;  $wR_2 = \{\sum [w(F_o^2 - F_c^2)^2] / \sum [w(F_o^2)^2]\}^{1/2}$ ;  $w^{-1} = \sigma^2(F_o^2) + (aP)^2 + bP$ .

**Table S4.** Crystal data, data collection and refinement parameters for the structures of **5b**, **5c**, **7a** and **9a**.

### Crystal structure of **5b**

Compound **5b** was found to crystallise in the orthorhombic space group *Pbca*.

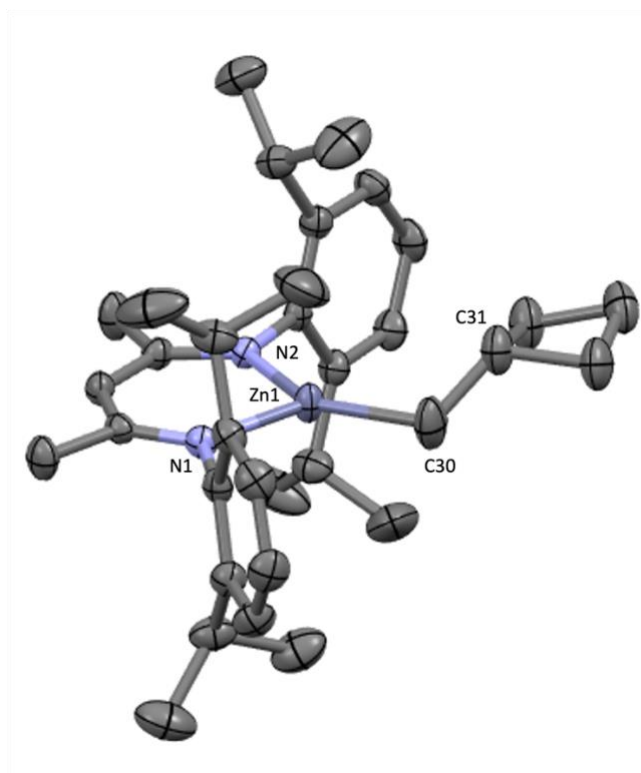

**Figure S60.** Structure of **5b**. Hydrogens removed for clarity. Thermal ellipsoids drawn at 50% probability.

### Crystal structure of **5c**

In the crystal structure of **5c** there is a large unassigned Q-peak (3.400 electrons) which sits in a chemically nonsensical position directly above C1 (0.759(4) Å). We were unable to satisfactorily assign or model this electron density. We investigated the following explanations in attempts to explain the artefact:

- *A result of unresolved twinning leading to a second crystal orientation.* Re-analysis of diffraction peaks reliably returns a peak indexing value of >98%. Even if a genuine <2% twin was present in the crystal sample, this would not manifest as such a large Q-peak.
- *Disorder in the phenyl ring containing C1.* There is no obvious disorder in the phenyl ring that would account for the unassigned electron density. If the ring were disordered over two positions with *ca.* 50:50 occupancy, an entire set of similar intensity Q-peaks should be observable to account for this alternative position. Within the 2,6-di-*iso*-propylphenyl group that contains C1 (as the *ipso*-carbon), disorder is observed in one *iso*-propyl group. In this case the CH<sub>3</sub> groups were both modelled anisotropically over two positions (58:42).
- *An entire secondary minor molecular orientation for 5c that sits within the same unit cell.* In this case it is presumed that the unassigned electron density would be from the heaviest

element in this hypothetical second orientation (Zn). Assigning the Q-peak as Zn with a low (5%) occupancy, and subsequent analysis of the remaining Q-peaks should allow complete or partial identification of this second orientation *e.g.* the coordinated N atoms, adjacent phenyl rings *etc.* Unfortunately, no such clear assignment could be made, and hence the electron density remains unassigned.

Despite the unassigned electron density, the overall structure has a reasonable  $R_1$ -factor of 7.91%. Nevertheless, no detailed analysis of bond lengths or angles was undertaken due to the unreliability of these values derived from the crystal structure alone. Still, the values that are obtained for key metrics *e.g.* Zn–C and Zn–N distances all fall within reported ranges for similar reported structures.

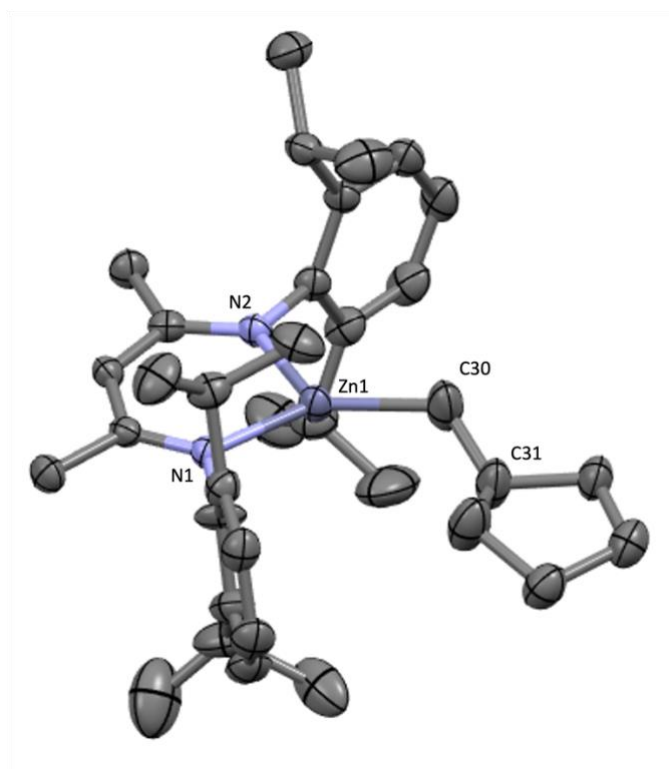

**Figure S61.** Structure of **5c**. Hydrogens and minor component (*iso*-propyl group) removed for clarity. Thermal ellipsoids drawn at 50% probability.



### Crystal structure of **7a**

The butene chain (C30–C33) was disordered and modelled over two crossing positions at slightly different orientations from the N1–Zn1–N2 plane ( $18.4(4)^\circ$  and  $35.0(11)^\circ$ ). The minor component was fixed at an occupancy of 20% and refined isotropically. The major component (80%) was refined anisotropically. SIMU and SADI restraints were used over the entire length of the minor component in order to mimic the major component. An additional DFIX was used for the C32B=C33B double bond. The final major component was found to be  $d_{(C32A-C33A)} = 1.157(9) \text{ \AA}$ .

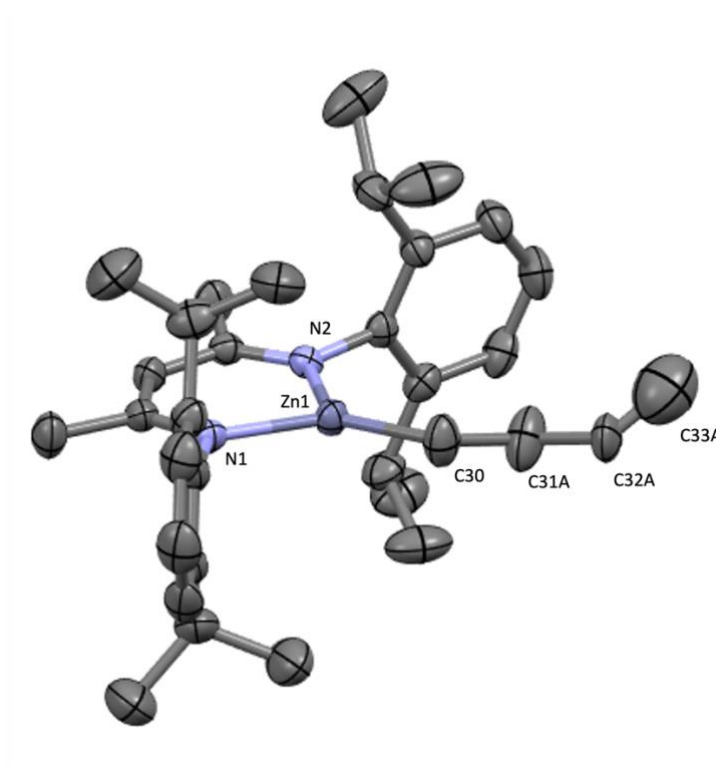

**Figure S62.** Structure of **7a**. Hydrogens and minor component (butene group) removed for clarity. Thermal ellipsoids drawn at 50% probability.

### Crystal structure of **9a**

The crystal structure of **9a** was found to crystallise with two independent molecules. The bridging butyl chain of one independent molecule was found to be disordered and was modelled over two crossing orientations (*ca.* 57:43). The geometries of each orientation were optimised, the thermal parameters of adjacent atoms were restrained to be similar, and both orientations were refined anisotropically.

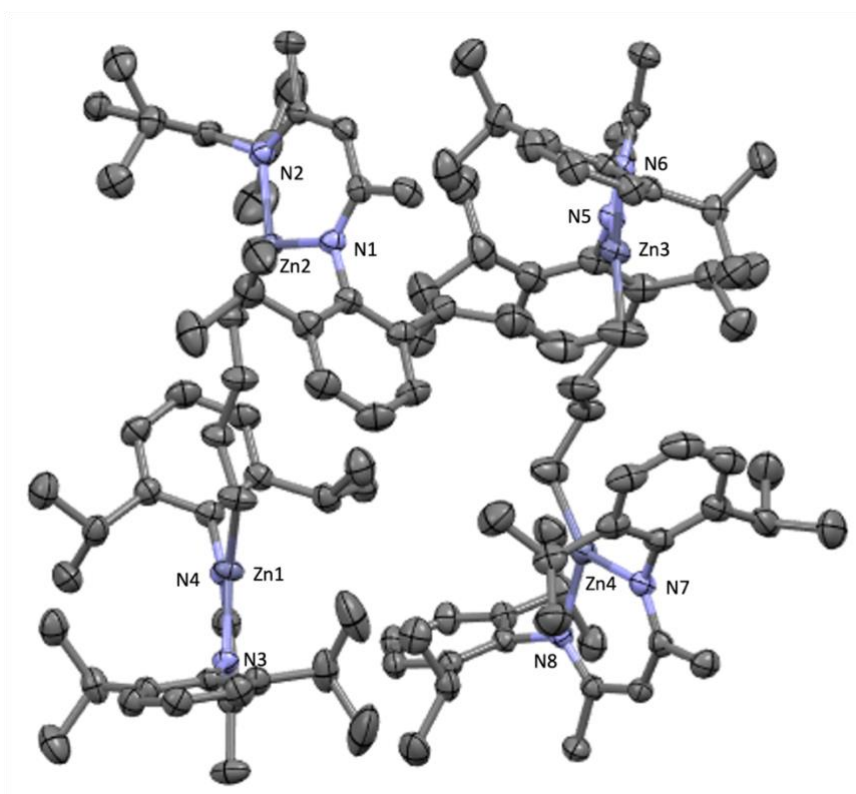

**Figure S63.** Structure of **9a**. Hydrogens and minor component (bridging butyl group) removed for clarity. Thermal ellipsoids drawn at 50% probability.

## 4. Computational Calculations

Density Functional Theory (DFT) calculations were run using Gaussian 09 (Revision D.01)<sup>10</sup> using the wB97X-D<sup>11</sup> functional and an ultrafine integrations grid (keyword int=ultrafine). Metal atoms (Mg, Zn) were described with Stuttgart SDDAll RECPs and associated basis sets, while a hybrid basis set was used for the other atoms: 6-31g\*\*(C, H)/ 6-311+g\*(N, O).<sup>12-14</sup> The level of theory used has previously been benchmarked in our group and shown to accurately reproduce the experimental results.<sup>15-18</sup>

Geometry optimisations were performed without symmetry constraints. Frequency analyses for all stationary points were performed to confirm their nature of the structures as either minima (no imaginary frequency) or transition states (only one imaginary frequency). Single point solvent corrections (benzene, epsilon = 2.2706) were applied using the polarized continuum model (PCM) to free energies.<sup>19</sup> Intrinsic Reaction Coordinate (IRC) calculations followed by full geometry optimisations on final points were used to connect transition states and minima located on the Potential Energy Surface.<sup>20,21</sup> A full energy profile was constructed (calculated at 298.15 K, 1 atm). The graphical user interface used to visualise the various properties of compounds **1-9** was GaussView 5.0.9.<sup>22</sup>

Functional testing was carried out and calculated bond lengths and angles compared to the single crystal X-ray data for compound **7a** (Table S5). Complete potential energy surfaces for both the zinc and magnesium system we report were calculated using the PBE0 functional,<sup>23-25</sup> with additional empirical dispersion=gd3bj<sup>26</sup> and solvent correction as reported above (Figure S13-16). Calculated data closely matched that of the wB97X-D functional.

Natural Bond Orbital analysis was carried out in NBO 6.0.<sup>27,28</sup> A full NBO analysis for all stationary points was carried out and the relevant NPA charges and Wiberg Bond Indices tabulated (Table S7-8). QTAIM calculations were performed using the AIMAll software.<sup>29,30</sup> Activation strain analysis were performed using input files from the AutoDIAS python tool.<sup>31</sup> Non-covalent interactions were analysed using the NCIPlot 3.0 program.<sup>32</sup>

## Computed structures, energies and analysis

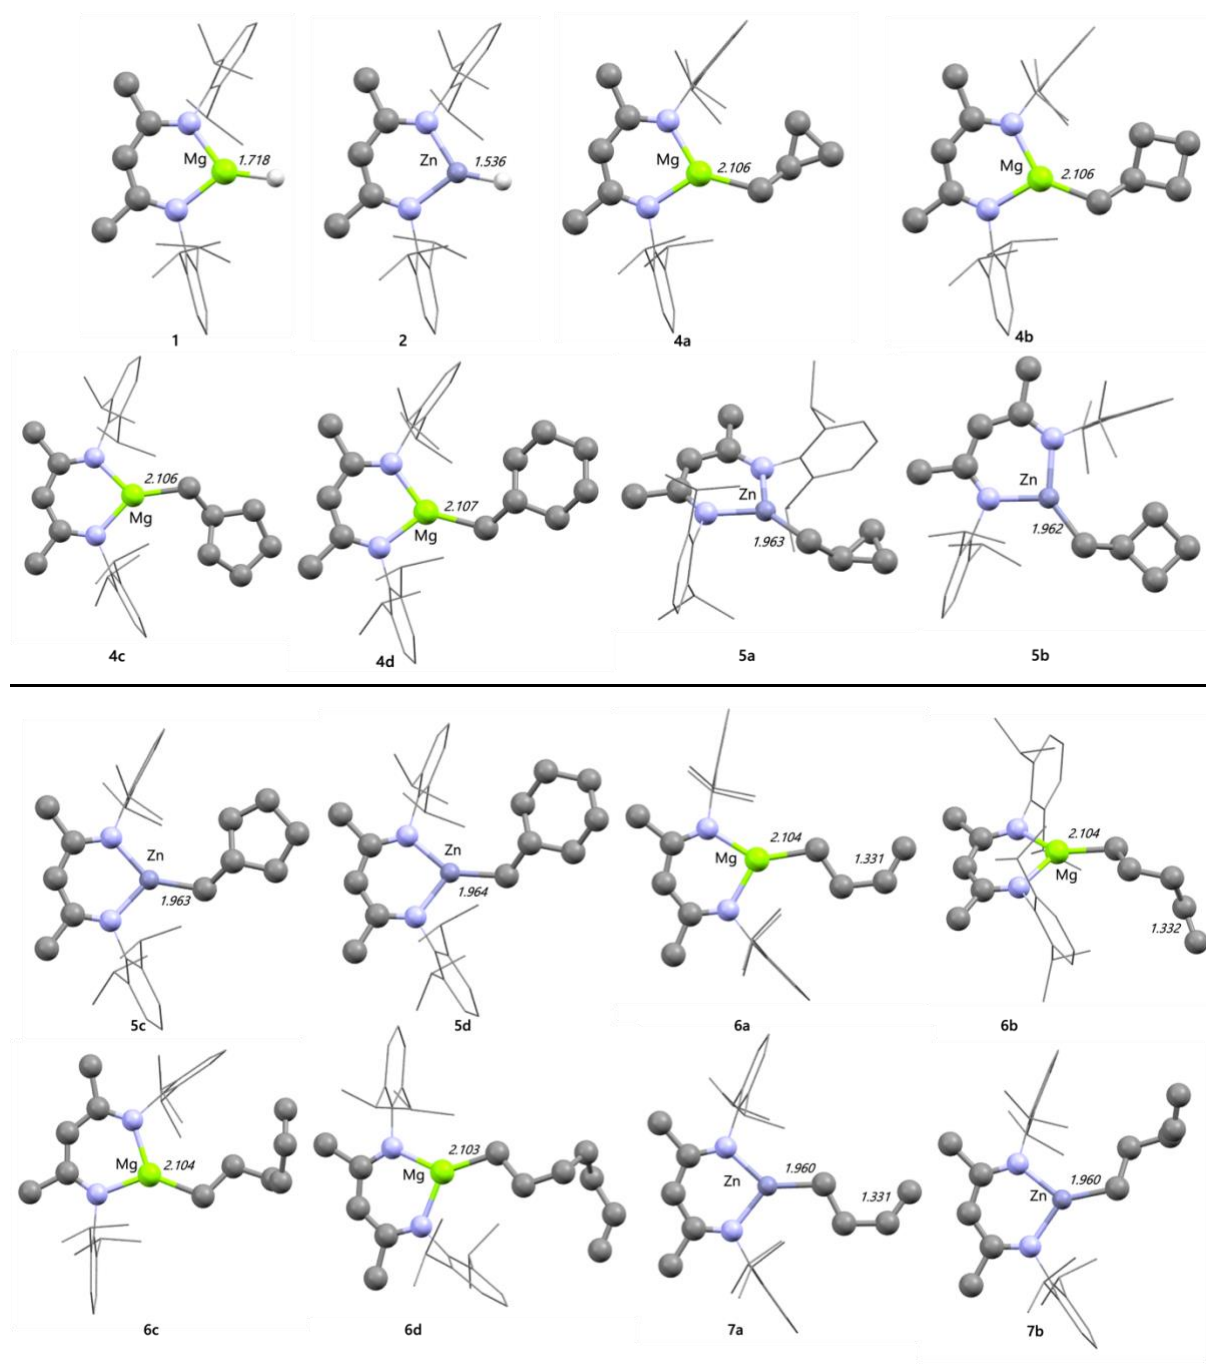

**Figure S64.** Structures of all stationary point minima as calculated by DFT. Select bond lengths annotated (Å), most hydrogen atoms omitted and diisopropyl units shown in wireframe for clarity.

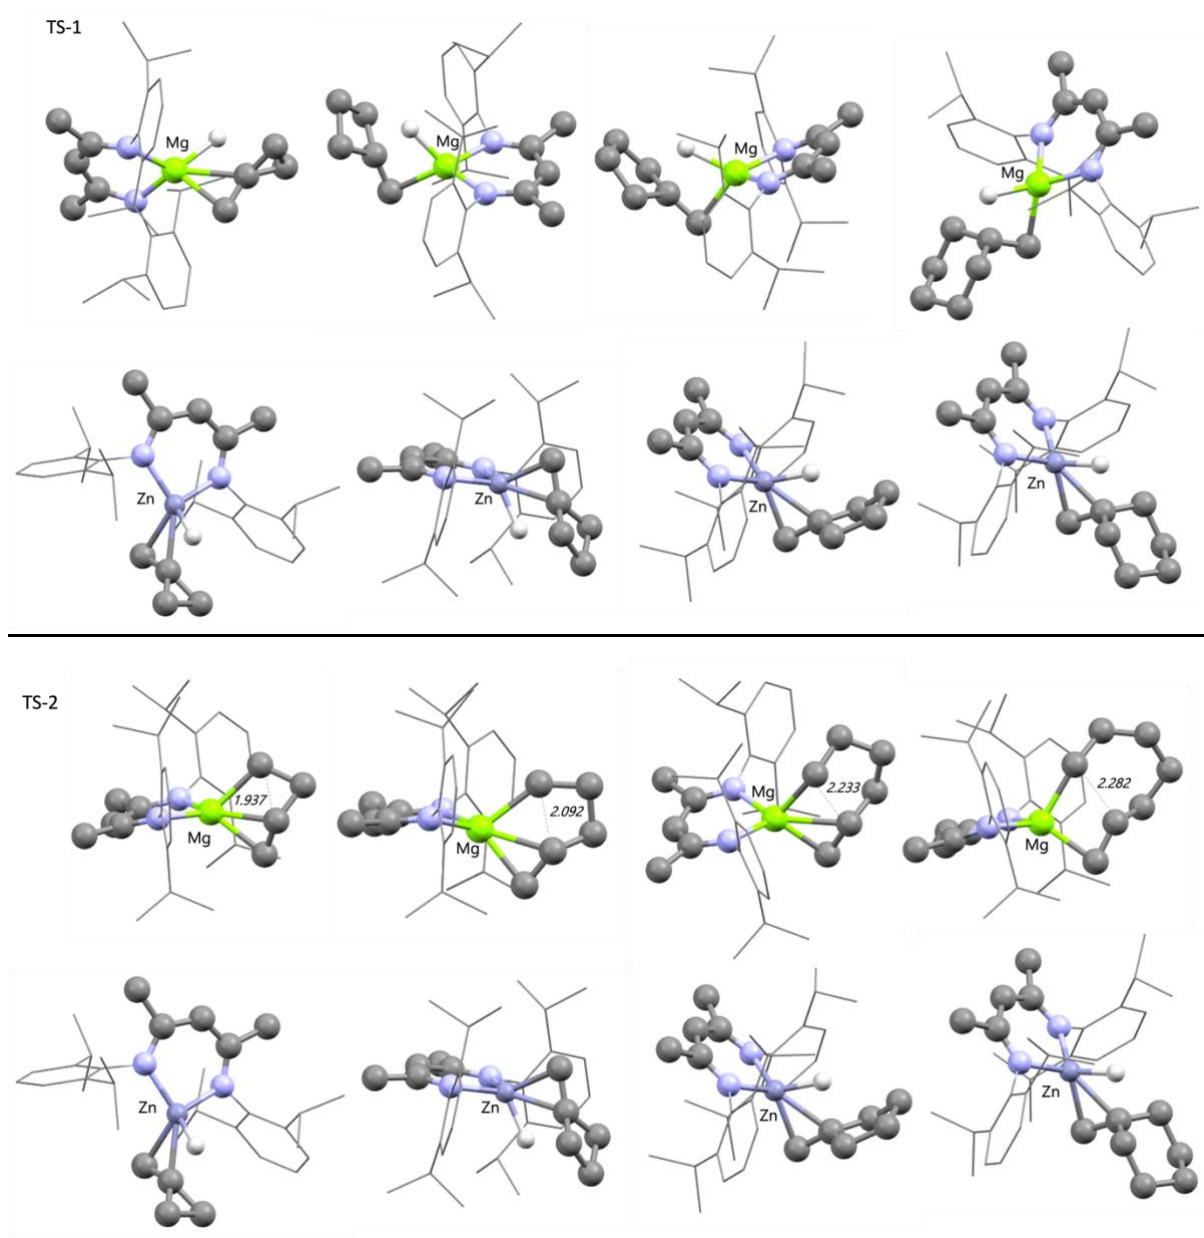

**Figure S65.** Structures of all transition states as calculated by DFT. Select bond lengths annotated (Å), most hydrogen atoms omitted and diisopropyl units shown in wireframe for clarity.

| <b>7a</b>                   | <b>xrd</b>                | <b><math>\omega</math>B97XD</b> | <b>B3LYP</b>    | <b>M06-L</b>    | <b>M06-2X</b>   | <b>PBE0</b>     |
|-----------------------------|---------------------------|---------------------------------|-----------------|-----------------|-----------------|-----------------|
| <b>C–Zn bond length (Å)</b> | 1.960(3)                  | 1.960                           | 1.968           | 1.965           | 2.007           | 1.961           |
| <b>C=C bond length (Å)</b>  | 1.157(9)                  | 1.323                           | 1.326           | 1.326           | 1.325           | 1.325           |
| <b>N–Zn bond length (Å)</b> | 1.956(2),<br>1.964(2)     | 1.964,<br>1.997                 | 1.975,<br>2.006 | 1.984,<br>2.022 | 2.000,<br>2.020 | 1.967,<br>2.000 |
| <b>N–Zn–C angle (°)</b>     | 131.84(10),<br>132.26(10) | 123.7,<br>142.2                 | 124.0,<br>141.7 | 122.2,<br>144.7 | 125.3,<br>141.7 | 124.0,<br>141.7 |
| <b>N–Zn–N angle (°)</b>     | 95.83(9)                  | 94.0                            | 94.1            | 93.1            | 93.0            | 94.2            |

**Table S5.** Functional testing for comparison with single crystal X-ray data for compound **7a**.

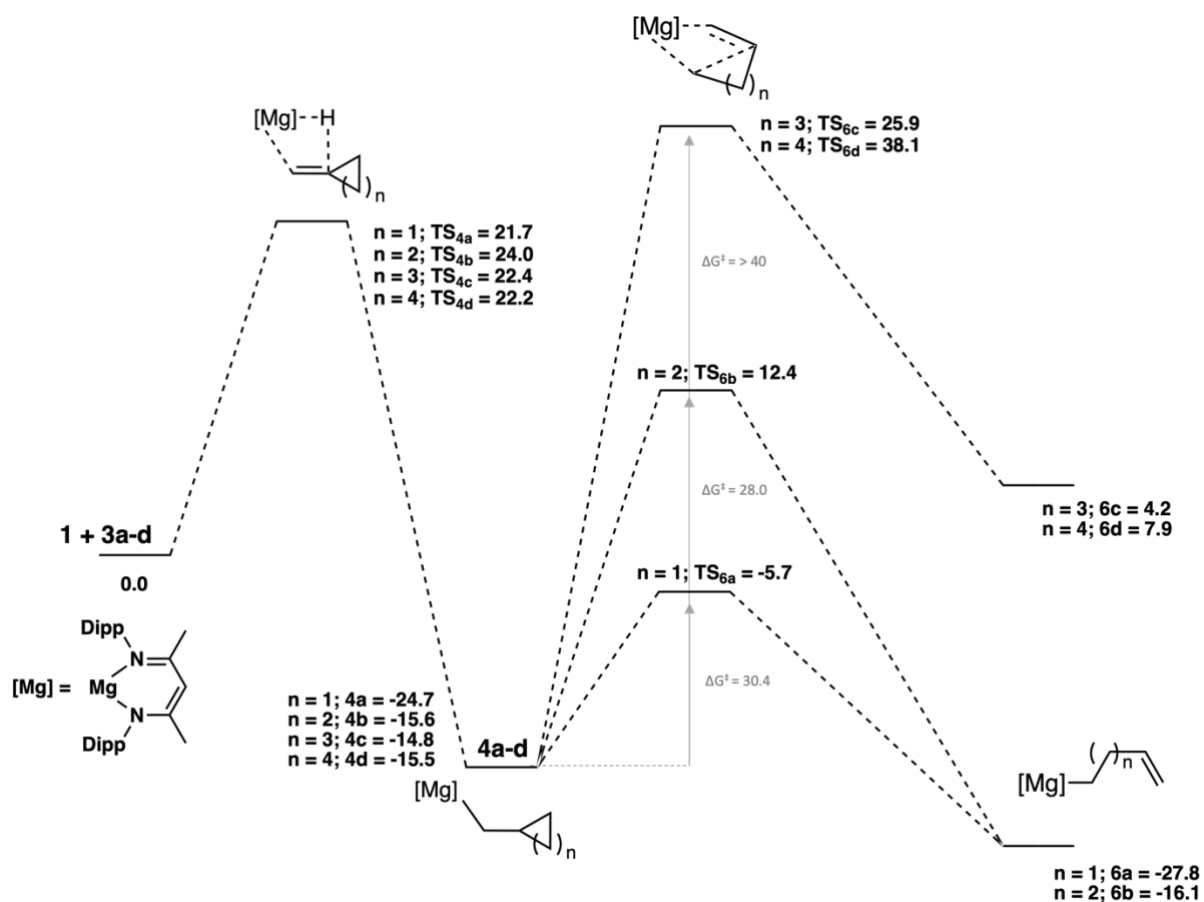

**Figure S66.** Potential energy surface for **1** with **3a-d** using the wB97X-D functional. Metal atoms (Mg, Zn) were described with Stuttgart SDDAll RECPs and associated basis sets, while a hybrid basis set was used for the other atoms: 6-31g\*\*(C, H)/ 6-311+g\*(N, O).

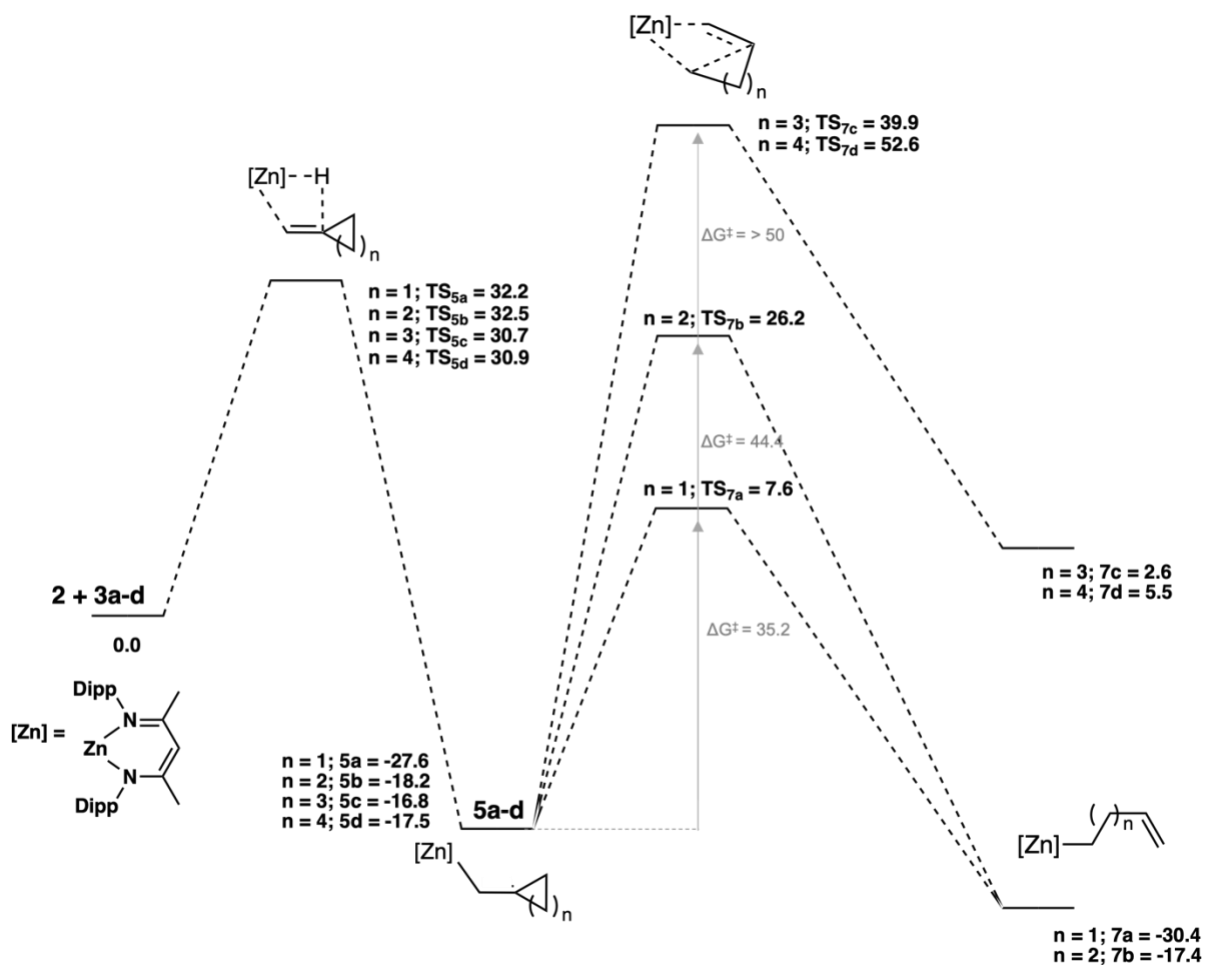

**Figure S67.** Potential energy surface for **2** with **3a-d** using the wB97X-D functional. Metal atoms (Mg, Zn) were described with Stuttgart SDDAll RECPs and associated basis sets, while a hybrid basis set was used for the other atoms: 6-31g\*\*(C, H)/ 6-311+g\*(N, O).



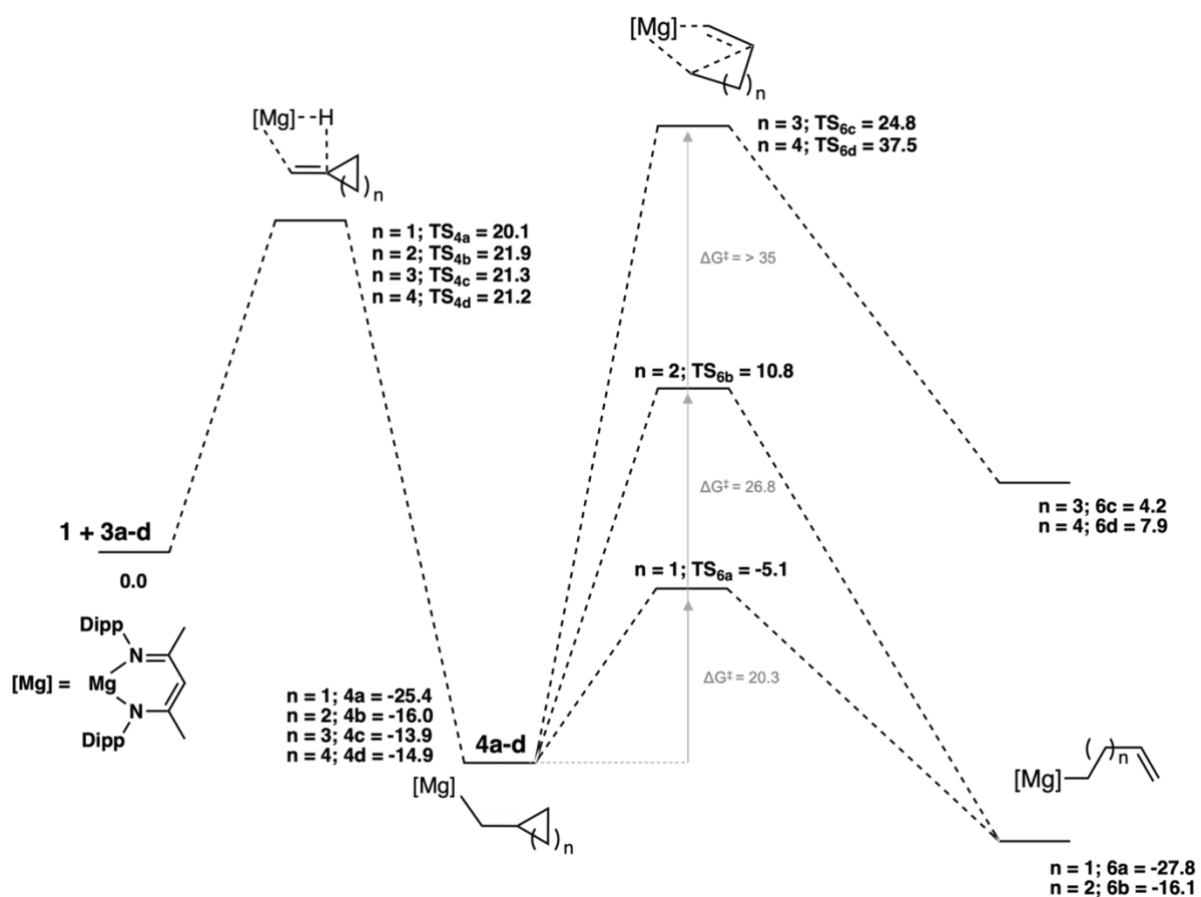

**Figure S68.** Potential energy surface for **1** with **3a-d** using the PBE0 functional and additional empirical dispersion (gd3bj). Metal atoms (Mg, Zn) were described with Stuttgart SDDAll RECPs and associated basis sets, while a hybrid basis set was used for the other atoms: 6-31g\*\*(C, H)/ 6-311+g\*(N, O).

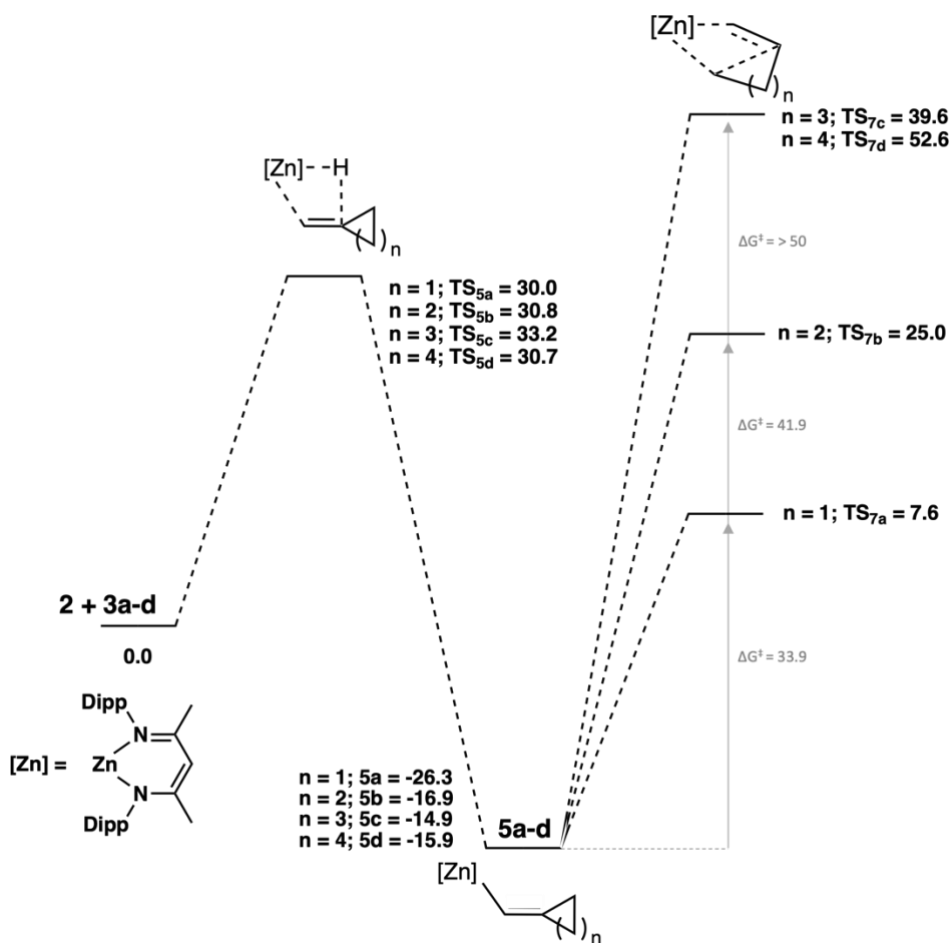

**Figure S69.** Potential energy surface for **2** with **3a-d** using the PBE0 functional and additional empirical dispersion (gd3bj). Metal atoms (Mg, Zn) were described with Stuttgart SDDAll RECPs and associated basis sets, while a hybrid basis set was used for the other atoms: 6-31g\*\*(C, H)/ 6-311+g\*(N, O).

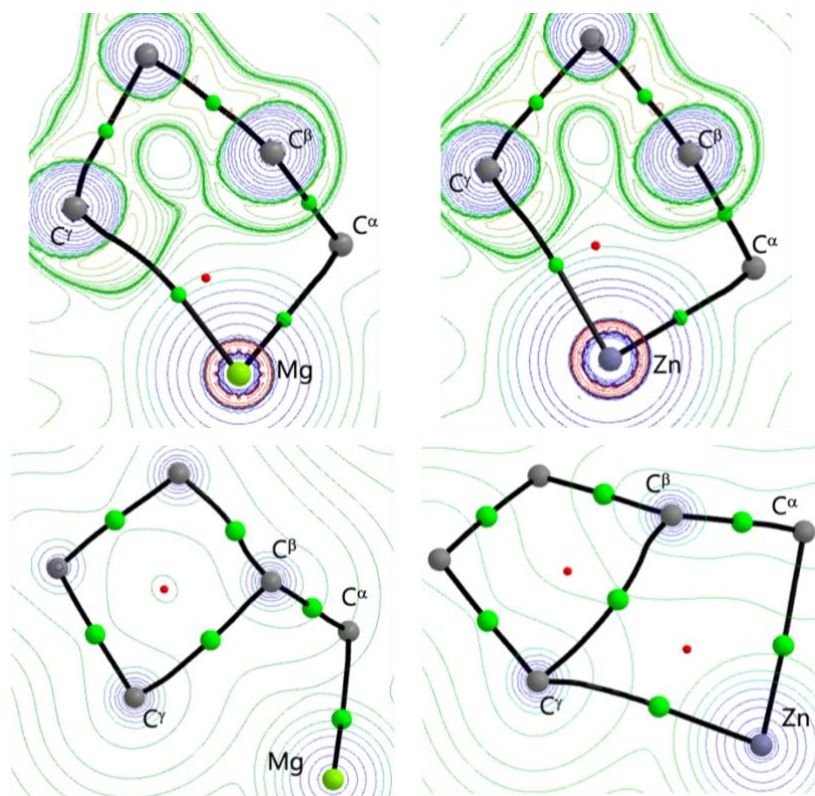

**Figure S70.** QAIM contour plot of  $\rho$  for key C–C breaking transition states. Atomic charges and electron density at the bond critical point ( $\rho$ ) are tabulated below. Bond (green) and ring (red) critical points are shown as spheres.

|                       | QAIM Charges |               |              |               | Bond $\rho$     |                 |                             |
|-----------------------|--------------|---------------|--------------|---------------|-----------------|-----------------|-----------------------------|
|                       | M            | C $^{\alpha}$ | C $^{\beta}$ | C $^{\gamma}$ | M–C $^{\alpha}$ | M–C $^{\gamma}$ | C $^{\beta}$ –C $^{\gamma}$ |
| <b>4a</b>             | 1.63         | -0.55         | 0.035        | 0.028         | 0.055           | -               | 0.24                        |
| <b>TS-2(Mg, n=1)</b>  | 1.67         | -0.40         | -0.24        | -0.32         | 0.062           | 0.047           | -                           |
| <b>4b</b>             | 1.63         | -0.058        | 0.092        | 0.035         | 0.055           | -               | 0.24                        |
| <b>TS-2 (Mg, n=2)</b> | 1.69         | -0.40         | -0.16        | -0.27         | 0.059           | -               | 0.135                       |
| <b>5a</b>             | 1.03         | -0.29         | 0.038        | -0.015        | 0.109           | -               | 0.243                       |
| <b>TS-1 (Zn, n=1)</b> | 1.16         | -0.29         | -0.17        | -0.23         | 0.098           | 0.077           | -                           |
| <b>5b</b>             | 1.03         | -0.33         | 0.094        | -0.001        | 0.109           | -               | 0.240                       |
| <b>TS-2 (Zn, n=2)</b> | 1.16         | -0.28         | 0.00         | -0.29         | 0.066           | 0.052           | 0.077                       |

**Table S6.** QAIM data for select calculated intermediates and transition states. Atomic charges and electron density at the bond critical point ( $\rho$ ).

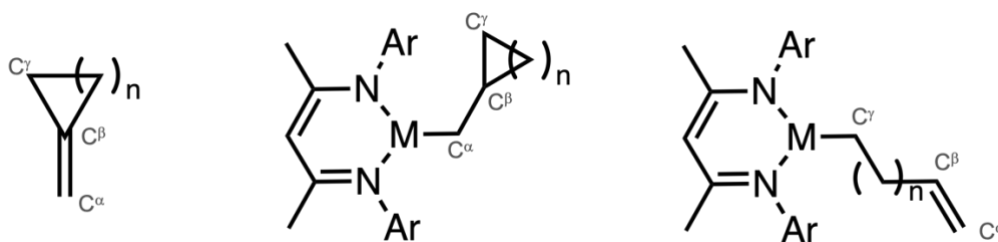

**Figure S71.** Schematic showing nomenclature for dft analysis.

|                      | NPA Charges |                |                |                | Wiberg Bond Indices |                   |                                |                                | Bond length (Å, dft) |                   |                                |                                |
|----------------------|-------------|----------------|----------------|----------------|---------------------|-------------------|--------------------------------|--------------------------------|----------------------|-------------------|--------------------------------|--------------------------------|
|                      | Mg          | C <sup>α</sup> | C <sup>β</sup> | C <sup>γ</sup> | Mg-C <sup>α</sup>   | Mg-C <sup>γ</sup> | C <sup>β</sup> -C <sup>γ</sup> | C <sup>α</sup> -C <sup>β</sup> | Mg-C <sup>α</sup>    | Mg-C <sup>γ</sup> | C <sup>β</sup> -C <sup>γ</sup> | C <sup>α</sup> -C <sup>β</sup> |
| <b>1</b>             | 1.54        | -              | -              | -              | -                   | -                 | -                              | -                              | -                    | -                 | -                              | -                              |
| <b>TS-1</b><br>(n=1) | 1.77        | -0.86          | -0.08          | -0.47          | 0.026               | 0.00              | 0.99                           | 1.54                           | 2.293                | 3.554             | 1.480                          | 1.377                          |
| <b>4a</b>            | 1.69        | -1.18          | -0.27          | -0.49          | 0.30                | 0.00              | 0.98                           | 1.04                           | 2.106                | 3.678             | 1.506                          | 1.520                          |
| <b>TS-2</b><br>(n=2) | 1.78        | -0.93          | 0.00           | -0.47          | 0.045               | 0.00              | 1.01                           | 1.50                           | 2.261                | 3.384             | 1.528                          | 1.390                          |
| <b>4b</b>            | 1.69        | -1.18          | -0.26          | -0.47          | 0.31                | 0.01              | 1.04                           | 0.98                           | 2.106                | 3.647             | 1.550                          | 1.522                          |
| <b>TS-2</b><br>(n=1) | 1.79        | -1.01          | -0.18          | -0.94          | 0.09                | 0.043             | 0.53                           | 1.36                           | 2.218                | 2.263             | 1.937                          | 1.423                          |
| <b>6a</b>            | 1.69        | -0.48          | -0.21          | -1.19          | 0.00                | 0.31              | 0.023                          | 1.97                           | 5.106                | 2.104             | 2.598                          | 1.331                          |
| <b>TS-2</b><br>(n=2) | 1.80        | -1.01          | -0.22          | -0.88          | 0.096               | 0.022             | 0.57                           | 1.37                           | 2.182                | 2.273             | 2.092                          | 1.423                          |
| <b>6b</b>            | 1.70        | -0.47          | -0.21          | -1.19          | 0.00                | 0.31              | 0.002                          | 1.97                           | 5.936                | 2.104             | 3.199                          | 1.332                          |

**Table S7.** Select Natural Population Analysis (NPA) Charges and Wiberg Bond Indices for complexes **4a-b**, **6a-b** and associated **TS**.

|                             | <i>NPA Charges</i> |                |                |                | <b>Wiberg Bond Indices</b> |                   |                                |                                | Bond length (Å, dft) |                   |                                |                                |
|-----------------------------|--------------------|----------------|----------------|----------------|----------------------------|-------------------|--------------------------------|--------------------------------|----------------------|-------------------|--------------------------------|--------------------------------|
|                             | Zn                 | C <sup>α</sup> | C <sup>β</sup> | C <sup>γ</sup> | Zn-C <sup>α</sup>          | Zn-C <sup>γ</sup> | C <sup>β</sup> -C <sup>γ</sup> | C <sup>α</sup> -C <sup>β</sup> | Mg-C <sup>α</sup>    | Mg-C <sup>γ</sup> | C <sup>β</sup> -C <sup>γ</sup> | C <sup>α</sup> -C <sup>β</sup> |
| <b>2</b>                    | 1.34               | -              | -              | -              | -                          | -                 | -                              | -                              | -                    | -                 | -                              | -                              |
| <b>TS-1</b><br><b>(n=1)</b> | 1.61               | -0.89          | -0.13          | -0.47          | 0.003                      | 0.007             | 0.99                           | 1.42                           | 2.156                | 3.336             | 1.482                          | 1.396                          |
| <b>5a</b>                   | 1.45               | -1.08          | -0.27          | -0.48          | 0.50                       | 0.003             | 0.98                           | 1.03                           | 1.963                | 3.635             | 1.503                          | 1.517                          |
| <b>TS-2</b><br><b>(n=2)</b> | 1.63               | -1.01          | -0.19          | -0.89          | 0.18                       | 0.092             | 0.55                           | 1.28                           | 2.089                | 2.213             | 1.925                          | 1.440                          |
| <b>5b</b>                   | 1.45               | -1.08          | -0.26          | -0.46          | 0.50                       | 0.012             | 0.98                           | 1.03                           | 1.962                | 3.580             | 1.548                          | 1.521                          |
| <b>TS-2</b><br><b>(n=1)</b> | 1.63               | -1.01          | -0.19          | -0.88          | 0.18                       | 0.17              | 0.55                           | 1.28                           | 2.089                | 2.213             | 1.925                          | 1.440                          |
| <b>7a</b>                   | 1.46               | -0.48          | -0.21          | -1.10          | 0.00                       | 0.51              | 0.02                           | 1.97                           | 4.945                | 1.960             | 2.580                          | 1.331                          |
| <b>TS-2</b><br><b>(n=2)</b> | 1.64               | -0.99          | -0.23          | -0.83          | 0.21                       | 0.058             | 0.58                           | 1.29                           | 2.049                | 2.267             | 2.094                          | 1.440                          |
| <b>7b</b>                   | 1.46               | -0.47          | -0.21          | -1.10          | 0.00                       | 0.50              | 0.002                          | 1.98                           | 5.858                | 1.960             | 3.170                          | 1.331                          |

**Table S8.** Select Natural Population Analysis (NPA) Charges and Wiberg Bond Indices for complexes **5a-b**, **7a-b** and associated **TS**.

### NBO analysis of select TS-2

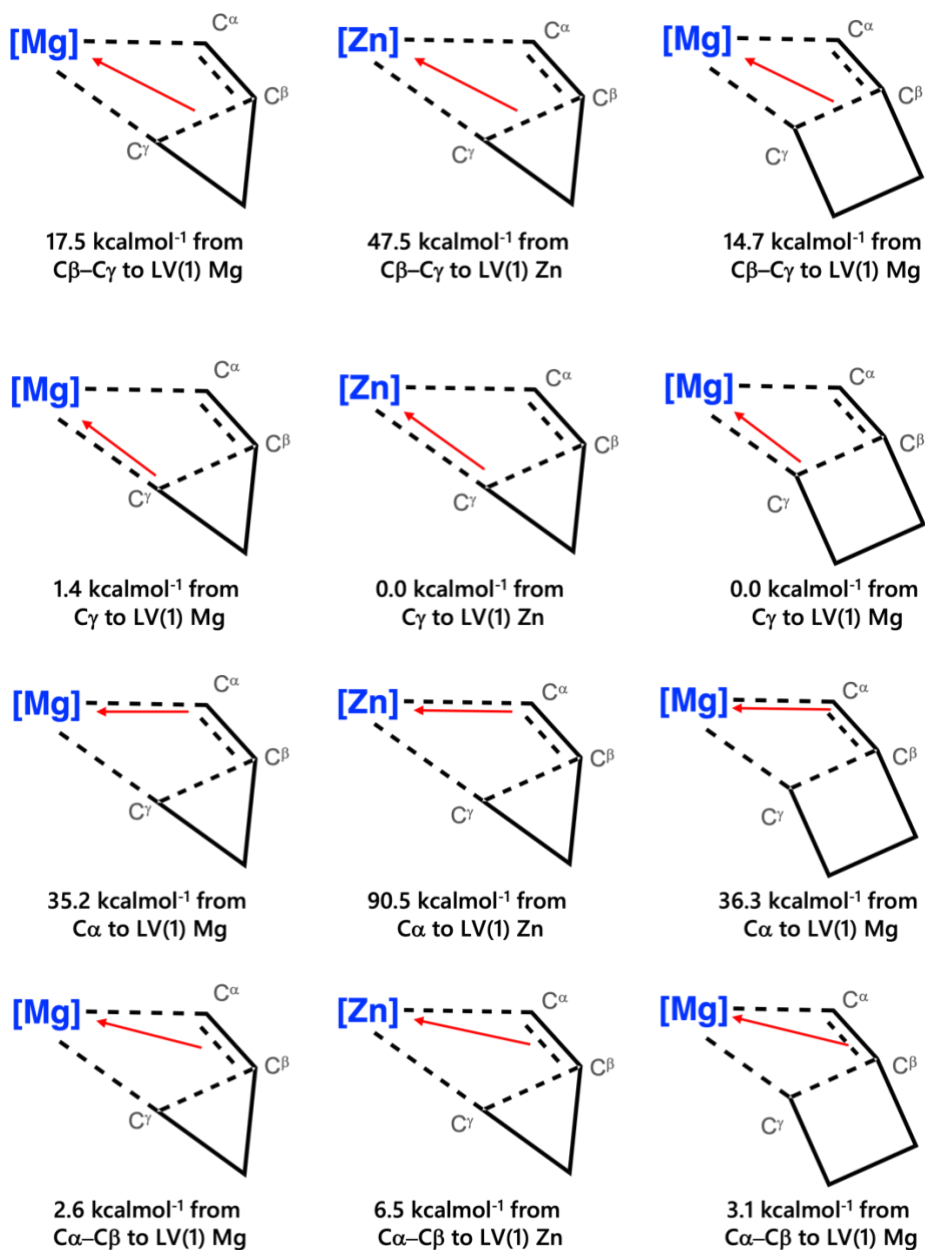

NBO analysis, specifically Second Order Perturbation, was used to give insight into the key C-C activation transition states. One stabilising interaction from the breaking C-C bond to the electropositive M (Mg, Zn) centre was found for **TS-2**. Stabilising donation of electron density from the C $\beta$ -C $\gamma$  bond to LV(1), the s-orbital on M.

## Activation Strain Analysis

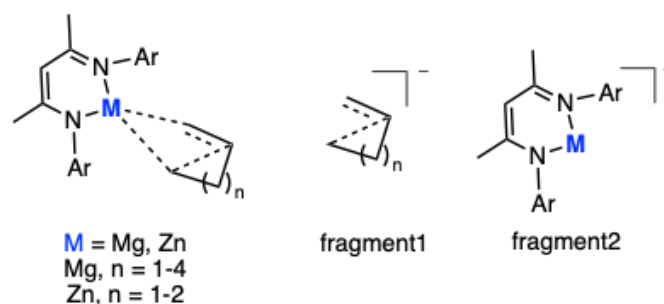

**Figure S72.** Fragmentation of complexes used for activation strain analysis input for **TS-2** (Mg,  $n = 1 - 4$ ; Zn  $n = 1 - 2$ ). Ar = 2,6-diisopropylphenyl.

Activation strain analysis were performed using input files from the AutoDIAS python tool<sup>31</sup> for **TS-2** (Mg,  $n = 1 - 4$ ; Zn  $n = 1 - 2$ ). Complexes were fragmented at the  $M-C^a$  bond (fragment1=alkyl anion; fragment2 = metal cation, Figure S20). Energy was plotted as a function of bond distance for the: a) breaking  $M-Ca$  bond; b) breaking  $Cb-Cg$  bond; and c) forming  $M-Cg$  bond ( $M = \text{Mg, Zn}$ ). Transition state is noted by a vertical dashed line. The total ( $E(\text{Tot})$ ), interaction ( $E(\text{Int})$ ), and distortion/strain ( $E(\text{Dist})$ ) energies at the transition state are tabulated (Table S9); energies in kcal/mol. Transition states are assigned as the geometry where  $E(\text{Tot})$  reaches a maximum.  $DE(X)$  ( $X = \text{Int, Dist}$ ) were calculated using the equation:  $DE(X) = E(X)^\ddagger - E(X)_{\text{initial}}$ , where  $E(X)$  initial is  $E(X)$  at the parent metallocyclocomplex (**4a-b**, **5a-b**).

|           |              | Distance (Å) |       |       | Energy          |                 |                  |       |                  |                   |      |
|-----------|--------------|--------------|-------|-------|-----------------|-----------------|------------------|-------|------------------|-------------------|------|
|           |              | M-Ca         | Cb-Cg | M-Cg  | $E(\text{Tot})$ | $E(\text{Int})$ | $E(\text{Dist})$ |       | $DE(\text{Int})$ | $DE(\text{Dist})$ |      |
|           |              |              |       |       |                 |                 | total            | frag1 | frag2            |                   |      |
| <b>Mg</b> | <b>n = 1</b> | 2.218        | 1.937 | 2.263 | -131.9          | -145.5          | 13.6             | 14.0  | -0.4             | 1.1               | 12.0 |
|           | <b>n = 2</b> | 2.182        | 2.092 | 2.273 | -124.7          | -138.5          | 13.8             | 15.5  | -1.6             | 7.7               | 11.9 |
|           | <b>n = 3</b> | 2.174        | 2.233 | 2.245 | -114.3          | -144.2          | 29.9             | 29.9  | 0.0              | 5.8               | 23.1 |
|           | <b>n = 4</b> | 2.161        | 2.250 | 2.232 | -99.9           | -142.3          | 42.4             | 42.5  | -0.1             | 8.7               | 27.7 |
| <b>Zn</b> | <b>n = 1</b> | 2.089        | 1.925 | 2.213 | -146.5          | -159.0          | 12.5             | 13.4  | -0.9             | 8.1               | 11.1 |
|           | <b>n = 2</b> | 2.049        | 2.094 | 2.267 | -138.9          | -152.2          | 13.2             | 14.7  | -1.4             | 19.7              | 12.9 |

**Table S9.** Activation strain analysis at the transition state for **TS-2** (Mg,  $n = 1 - 4$ ; Zn  $n = 1 - 2$ ).  $E(\text{Tot})$ ,  $E(\text{Int})$ , and  $E(\text{Dist})$  are the total, interaction, and distortion (strain) energy at the transition state, respectively. Energy in kcalmol<sup>-1</sup>.

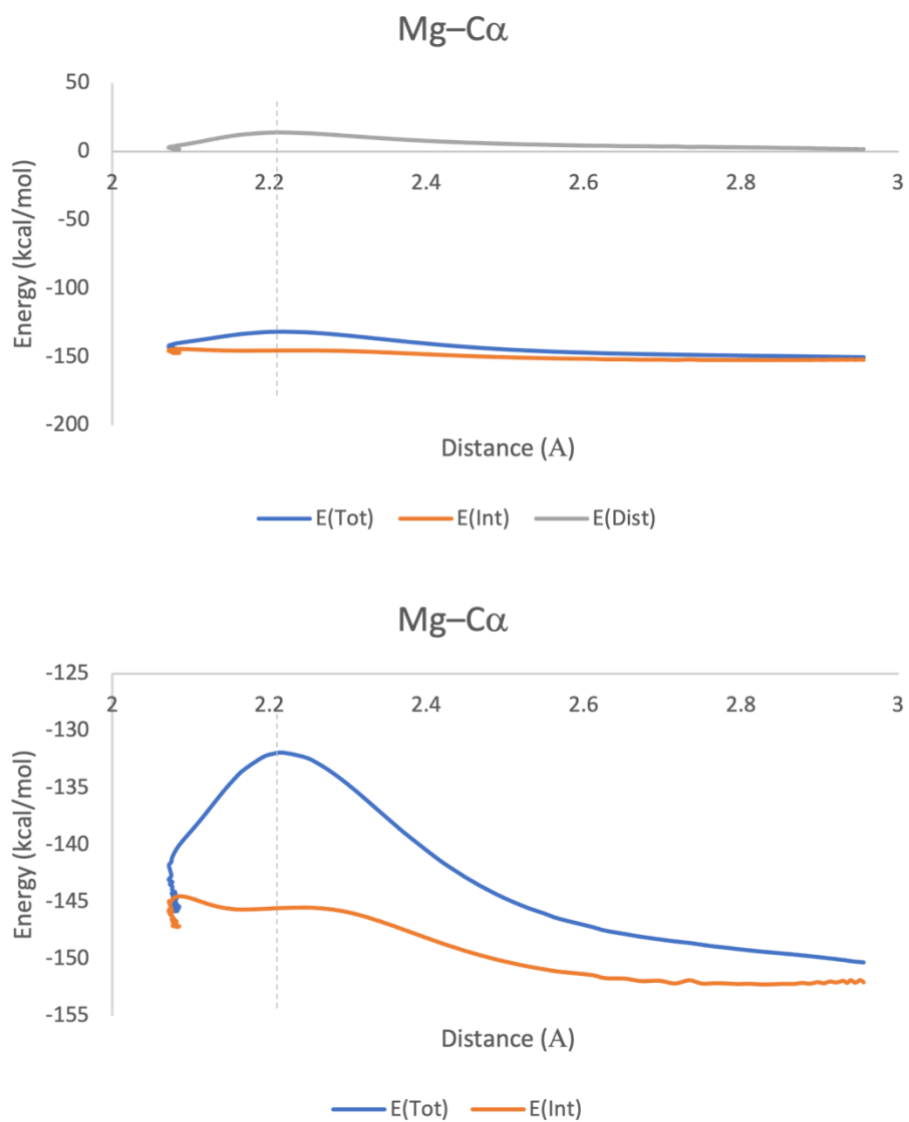

**Figure S73.** Activation Strain Analysis plot for TS-2 (Mg,  $n = 1$ ) along the Mg-C $\alpha$  bond. Transition state is noted as a dashed vertical line.



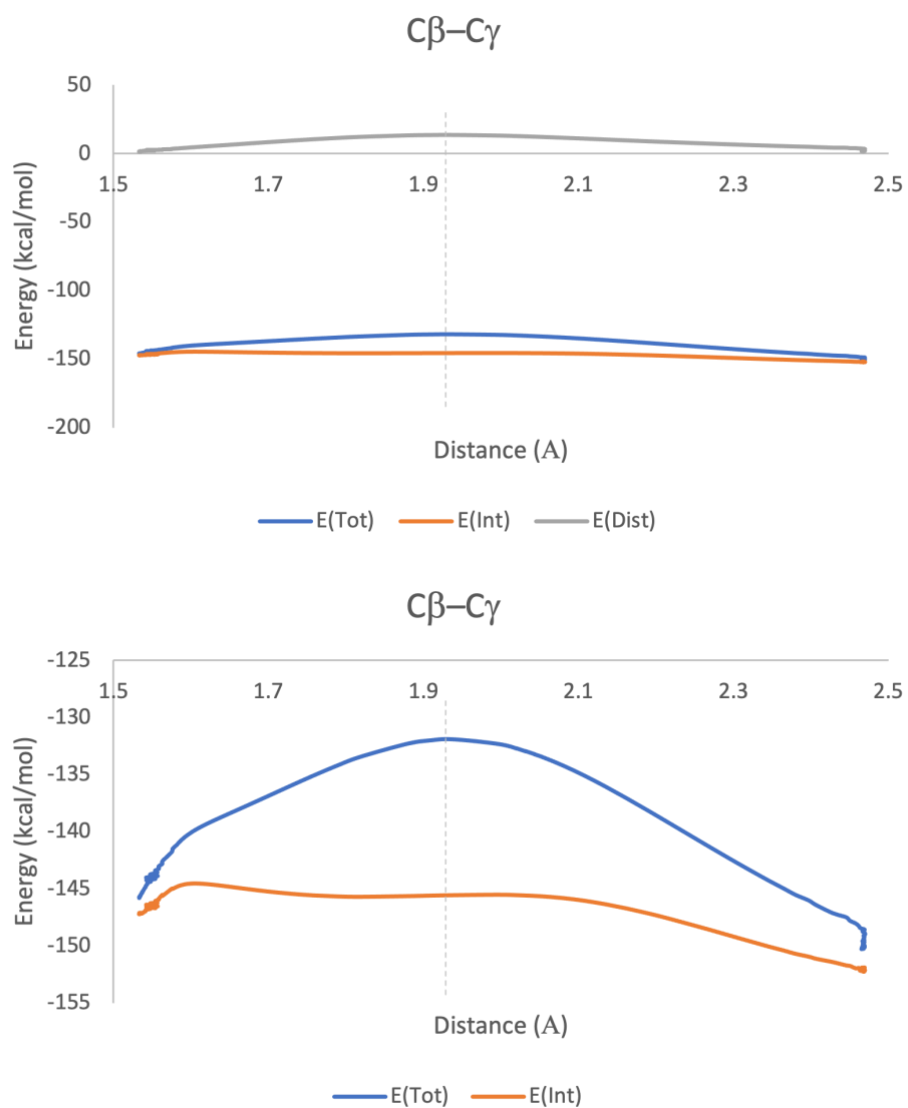

**Figure S74.** Activation Strain Analysis plot for **TS-2** (Mg,  $n = 1$ ) along the  $C\beta-C\gamma$  bond. Transition state is noted as a dashed vertical line.

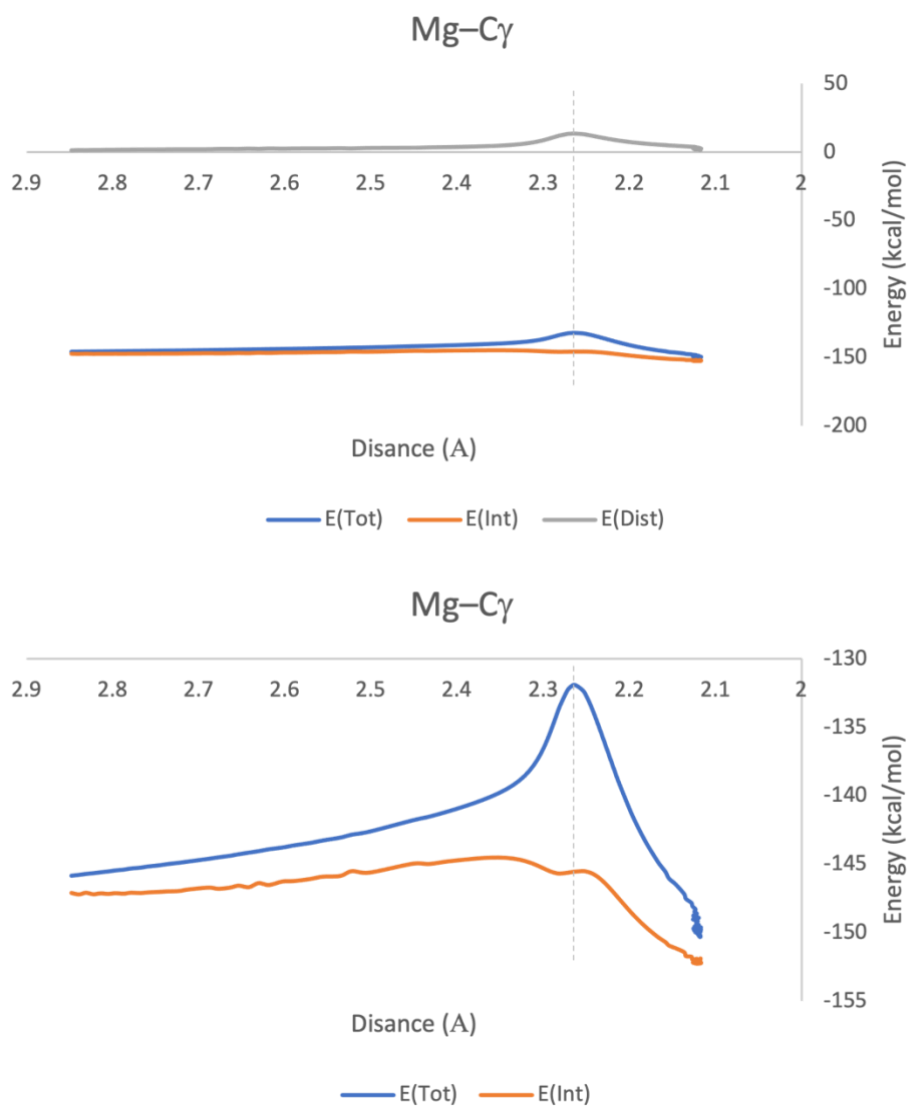

**Figure S75.** Activation Strain Analysis plot for **TS-2** (Mg,  $n = 1$ ) along the Mg-C $\gamma$  bond. Transition state is noted as a dashed vertical line.

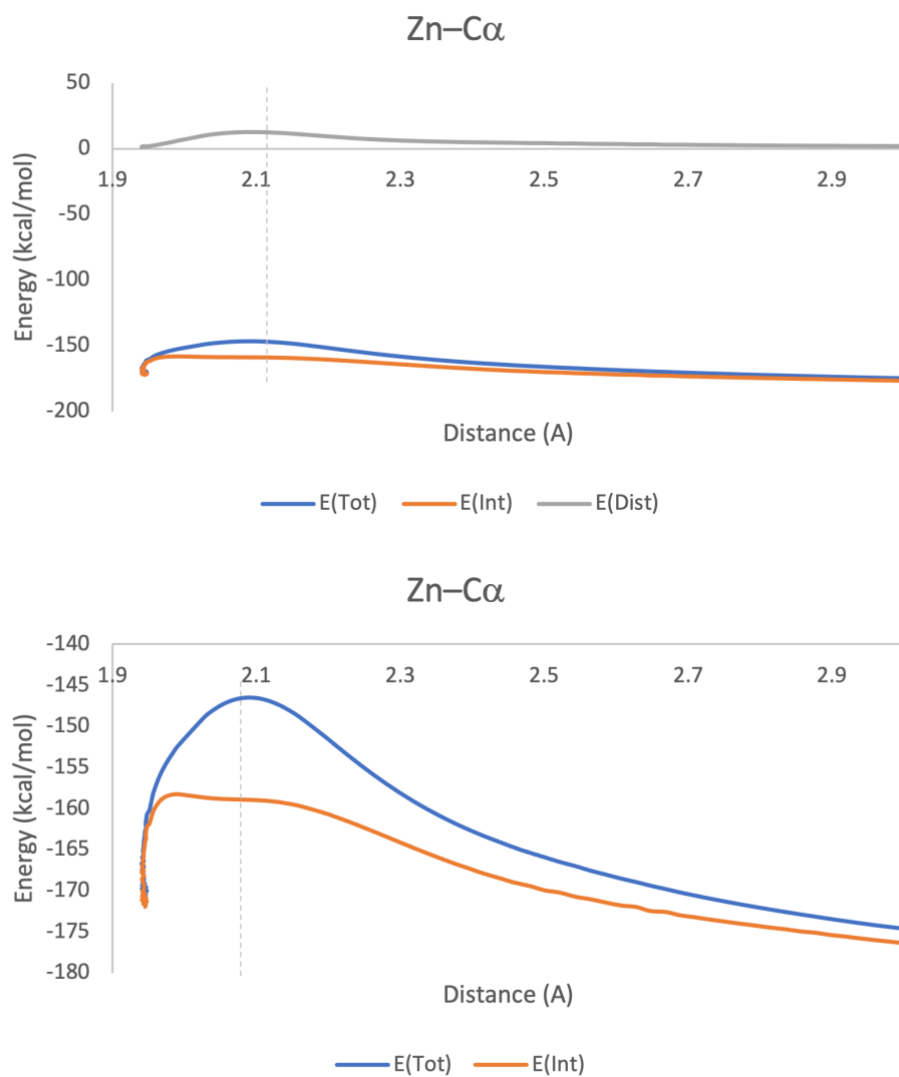

**Figure S76.** Activation Strain Analysis plot for **TS-2** (Zn,  $n = 1$ ) along the Zn-Ca bond. Transition state is noted as a dashed vertical line.

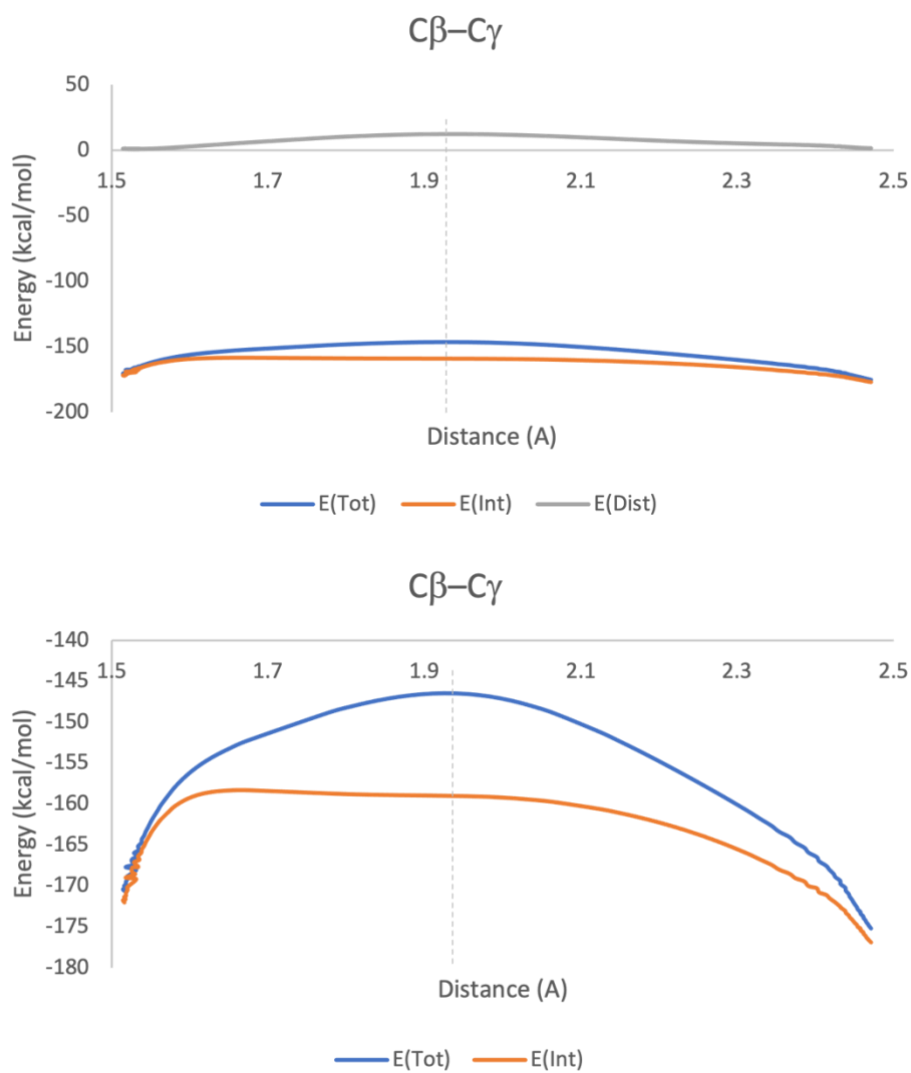

**Figure S77.** Activation Strain Analysis plot for **TS-2** (Zn,  $n = 1$ ) along the  $C\beta-C\gamma$  bond. Transition state is noted as a dashed vertical line.

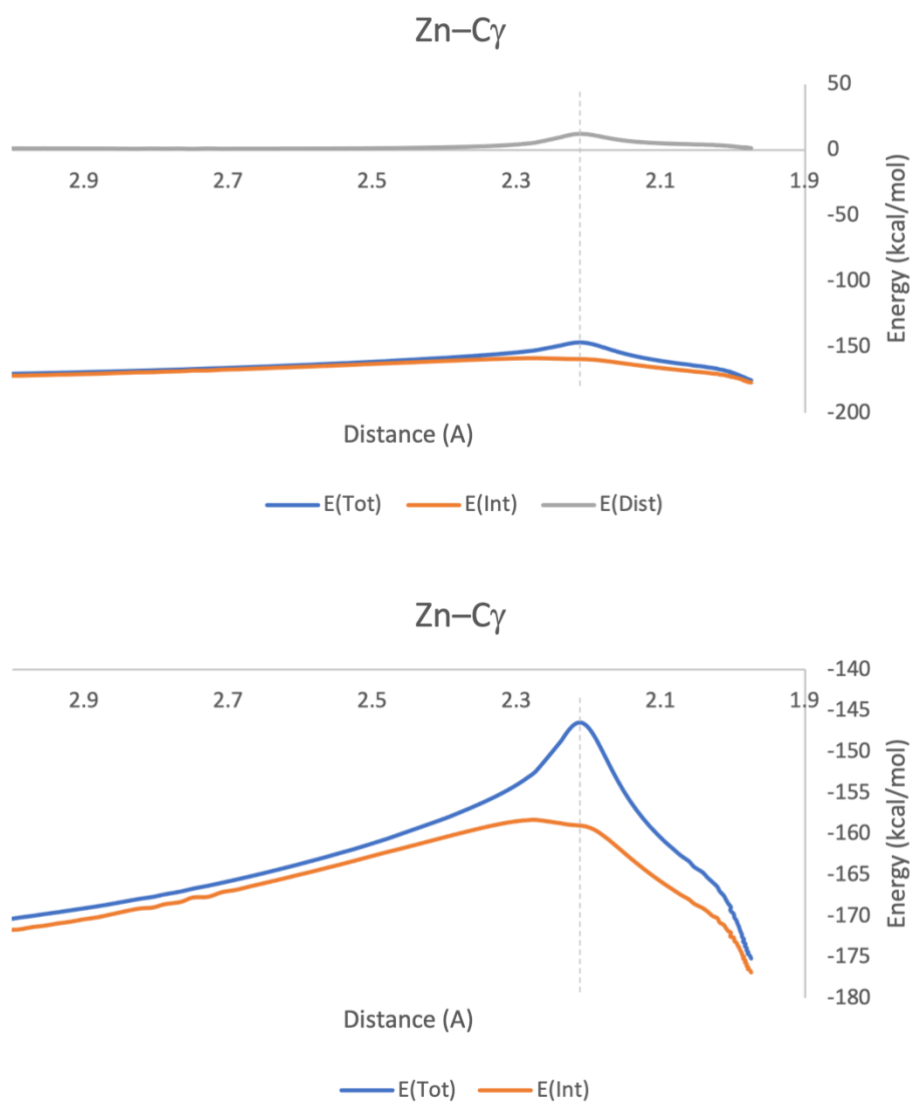

**Figure S78.** Activation Strain Analysis plot for **TS-2** (Zn,  $n = 1$ ) along the Zn-C $\gamma$  bond. Transition state is noted as a dashed vertical line.

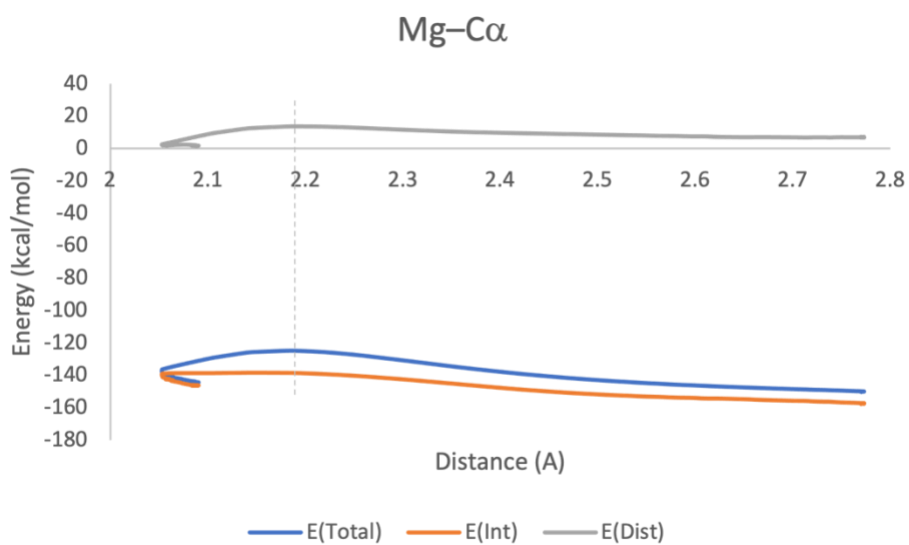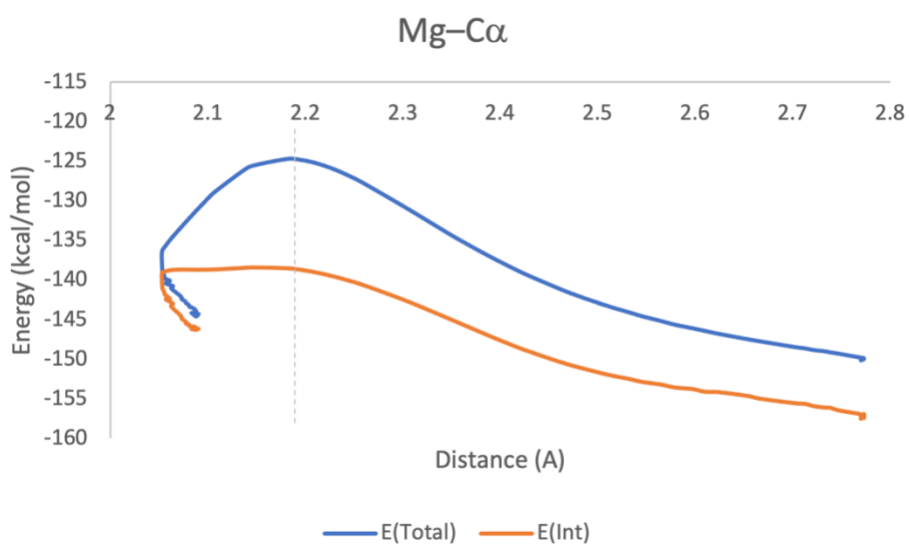

**Figure S79.** Activation Strain Analysis plot for **TS-2** (Mg,  $n = 2$ ) along the Mg-C $\alpha$  bond. Transition state is noted as a dashed vertical line.

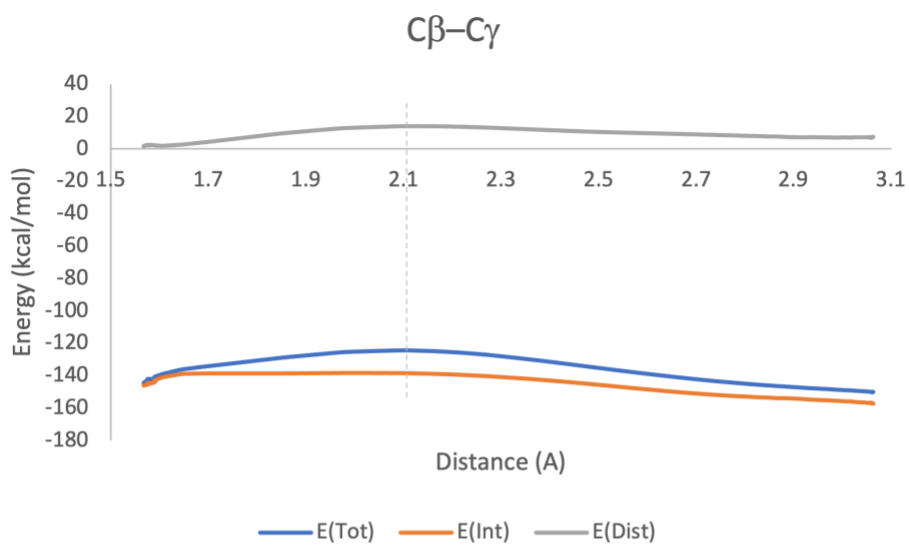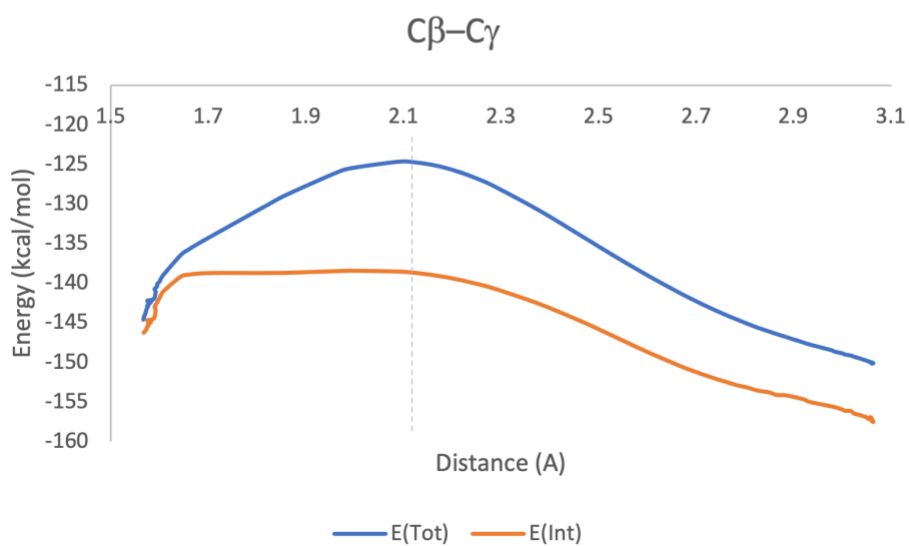

**Figure S80.** Activation Strain Analysis plot for **TS-2** (Mg,  $n = 2$ ) along the C $\beta$ -C $\gamma$  bond. Transition state is noted as a dashed vertical line.

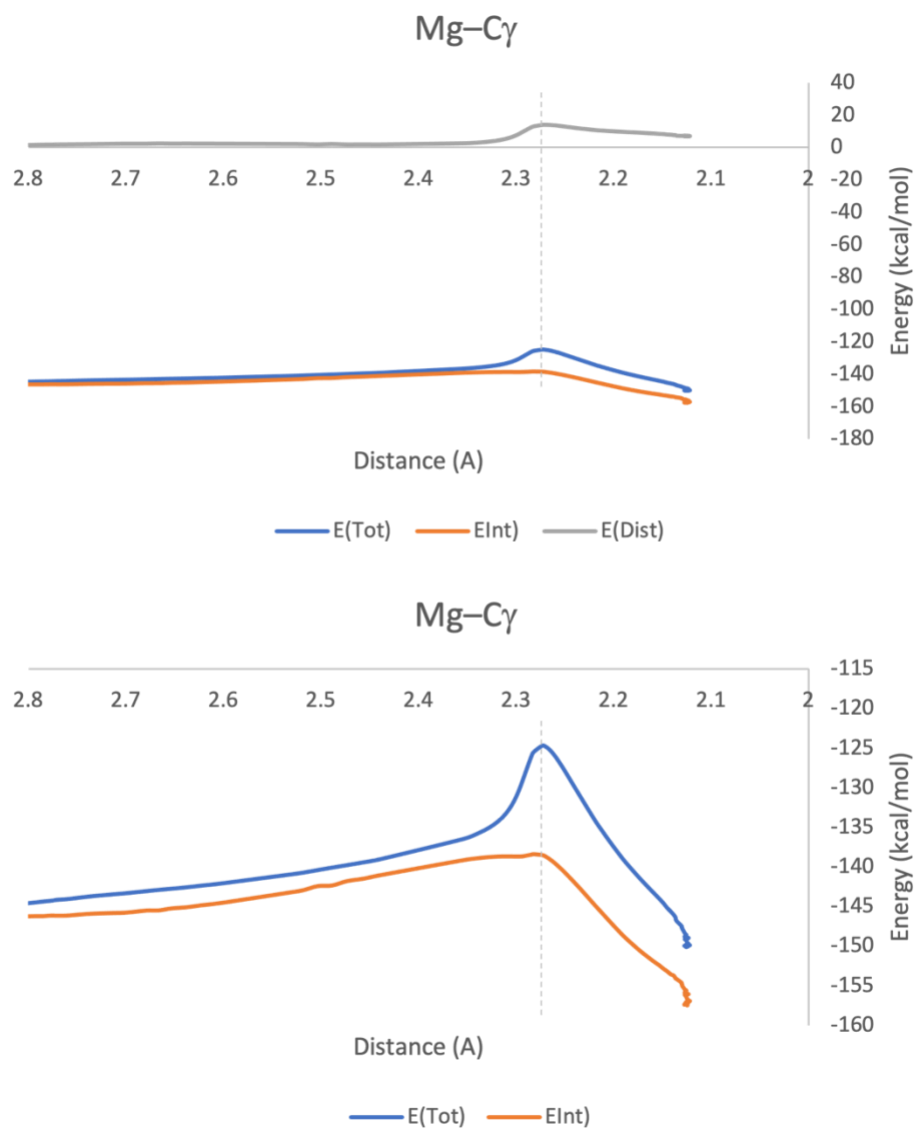

**Figure S81.** Activation Strain Analysis plot for **TS-2** (Mg,  $n = 2$ ) along the Mg-C $\gamma$  bond. Transition state is noted as a dashed vertical line.



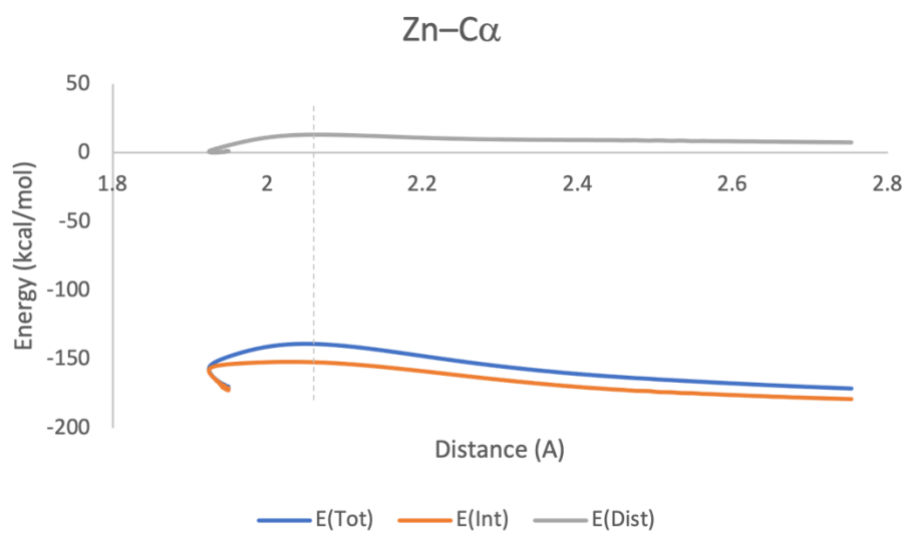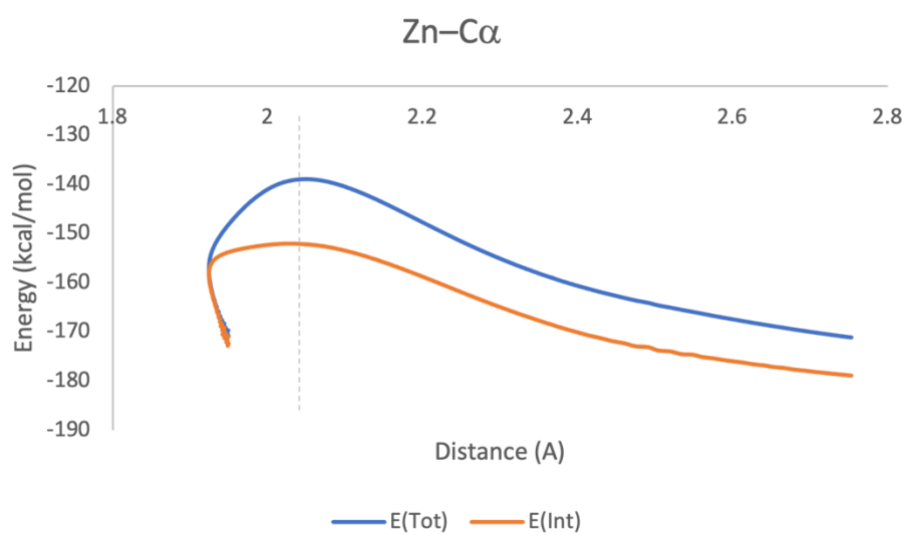

**Figure S82.** Activation Strain Analysis plot for **TS-2** (Zn,  $n = 2$ ) along the Zn-Ca bond. Transition state is noted as a dashed vertical line.

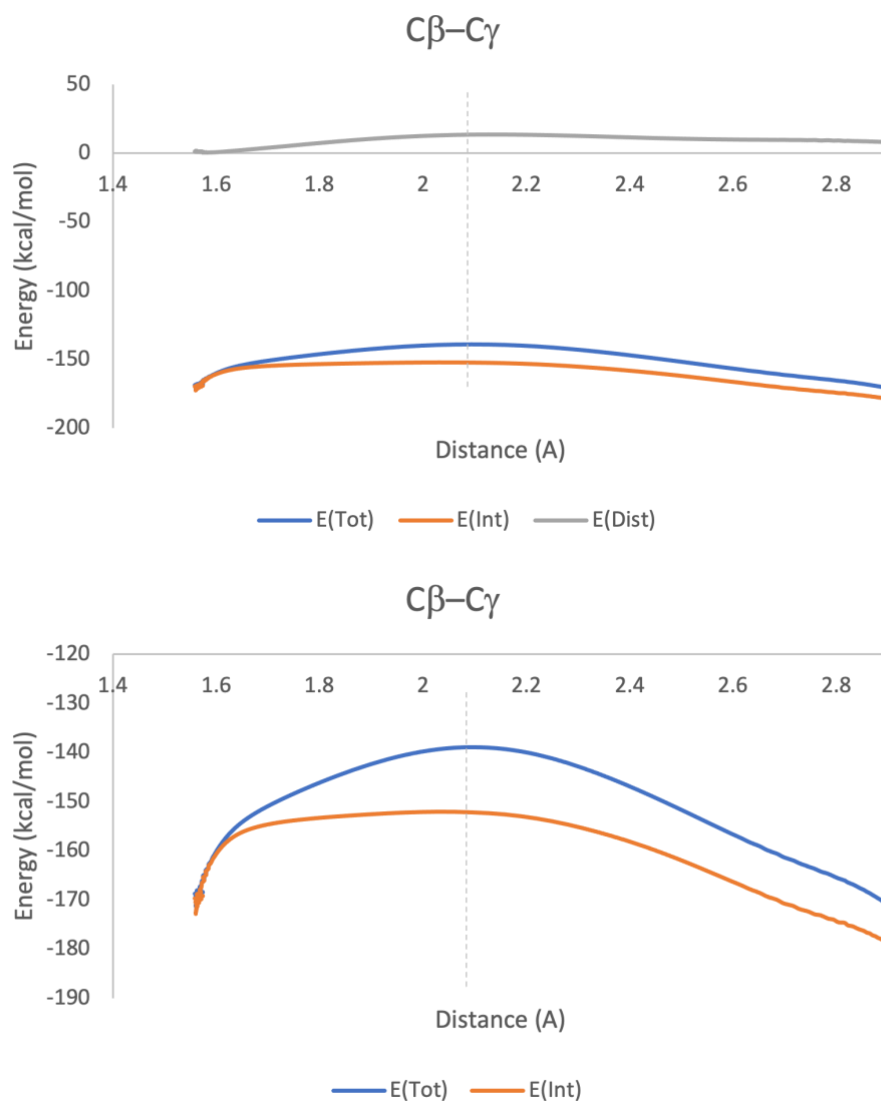

**Figure S83.** Activation Strain Analysis plot for **TS-2** (Zn,  $n = 2$ ) along the  $C\beta-C\gamma$  bond. Transition state is noted as a dashed vertical line.

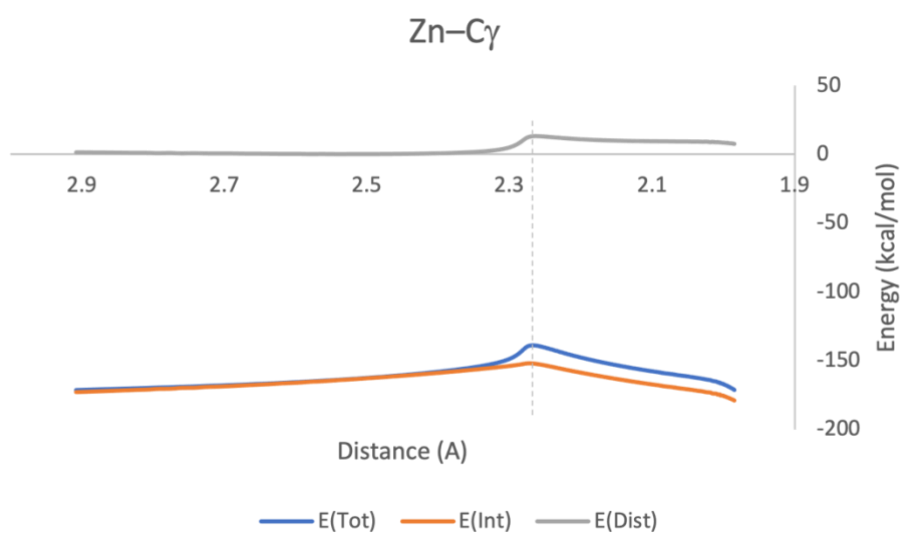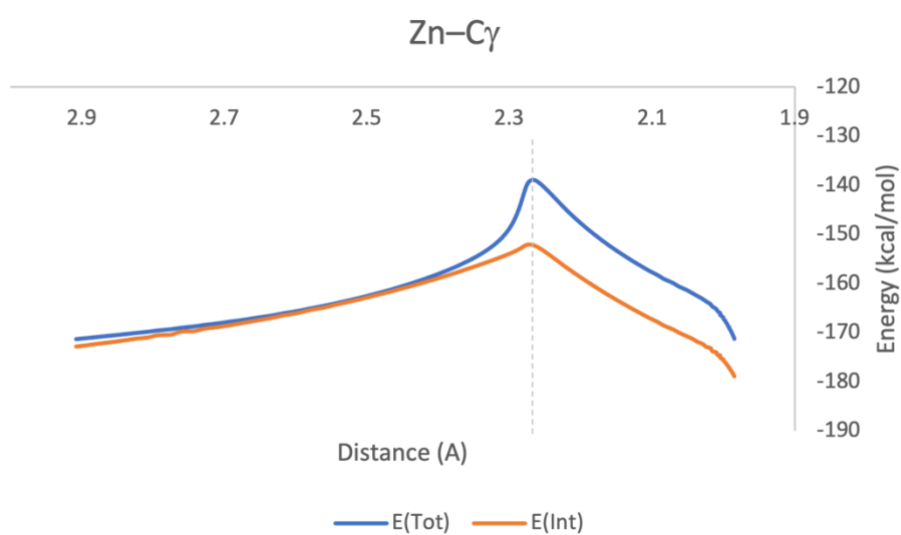

**Figure S84.** Activation Strain Analysis plot for **TS-2** (Zn,  $n = 2$ ) along the Zn-C $\gamma$  bond. Transition state is noted as a dashed vertical line.

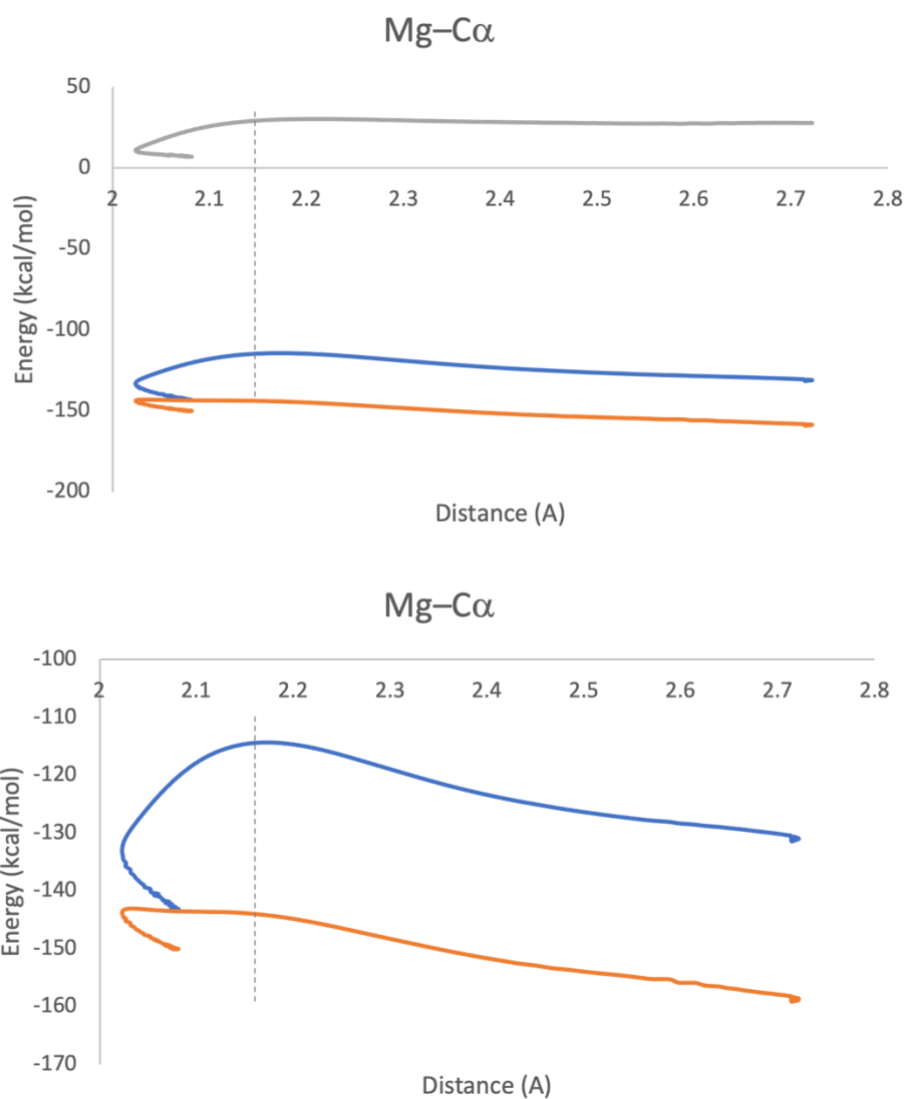

**Figure S85.** Activation Strain Analysis plot for **TS-2** (Mg,  $n = 3$ ) along the Mg-Ca bond. Transition state is noted as a dashed vertical line.

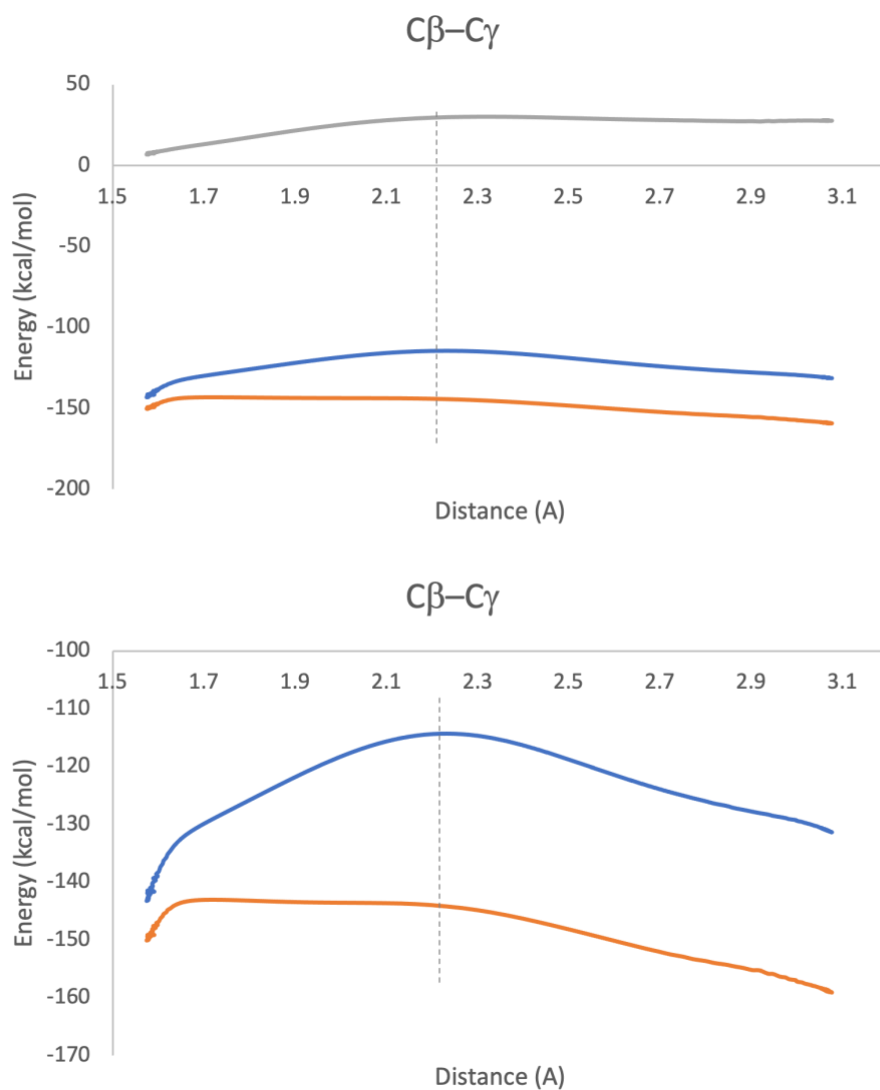

**Figure S86.** Activation Strain Analysis plot for **TS-2** (Mg,  $n = 3$ ) along the  $C\beta-C\gamma$  bond. Transition state is noted as a dashed vertical line.

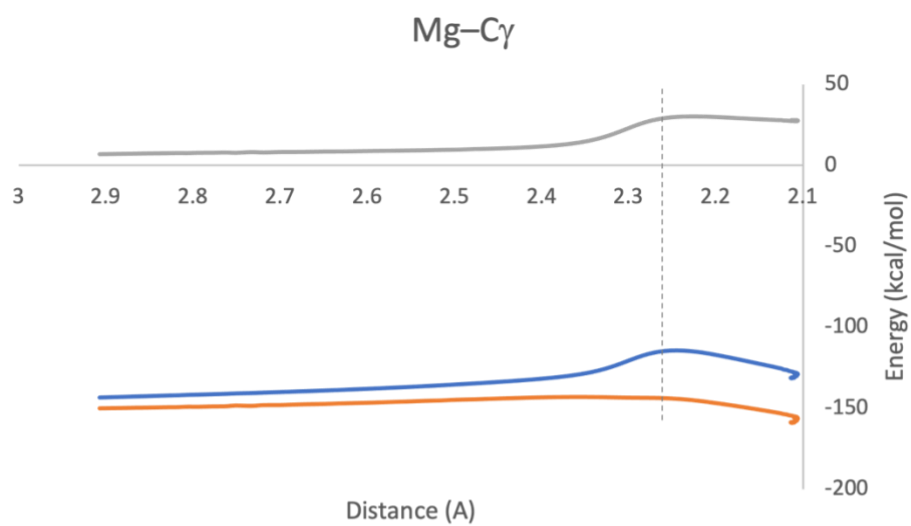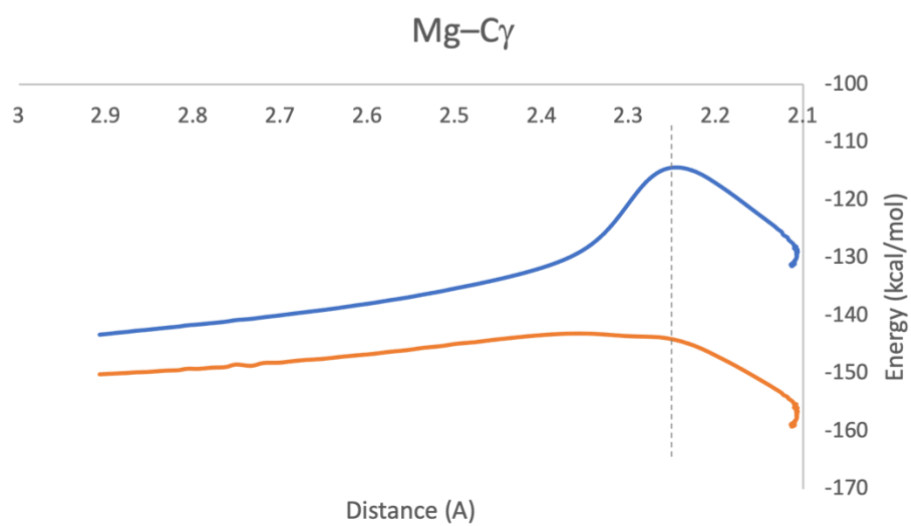

**Figure S87.** Activation Strain Analysis plot for **TS-2** (Mg,  $n = 3$ ) along the Mg-C $\gamma$  bond. Transition state is noted as a dashed vertical line.

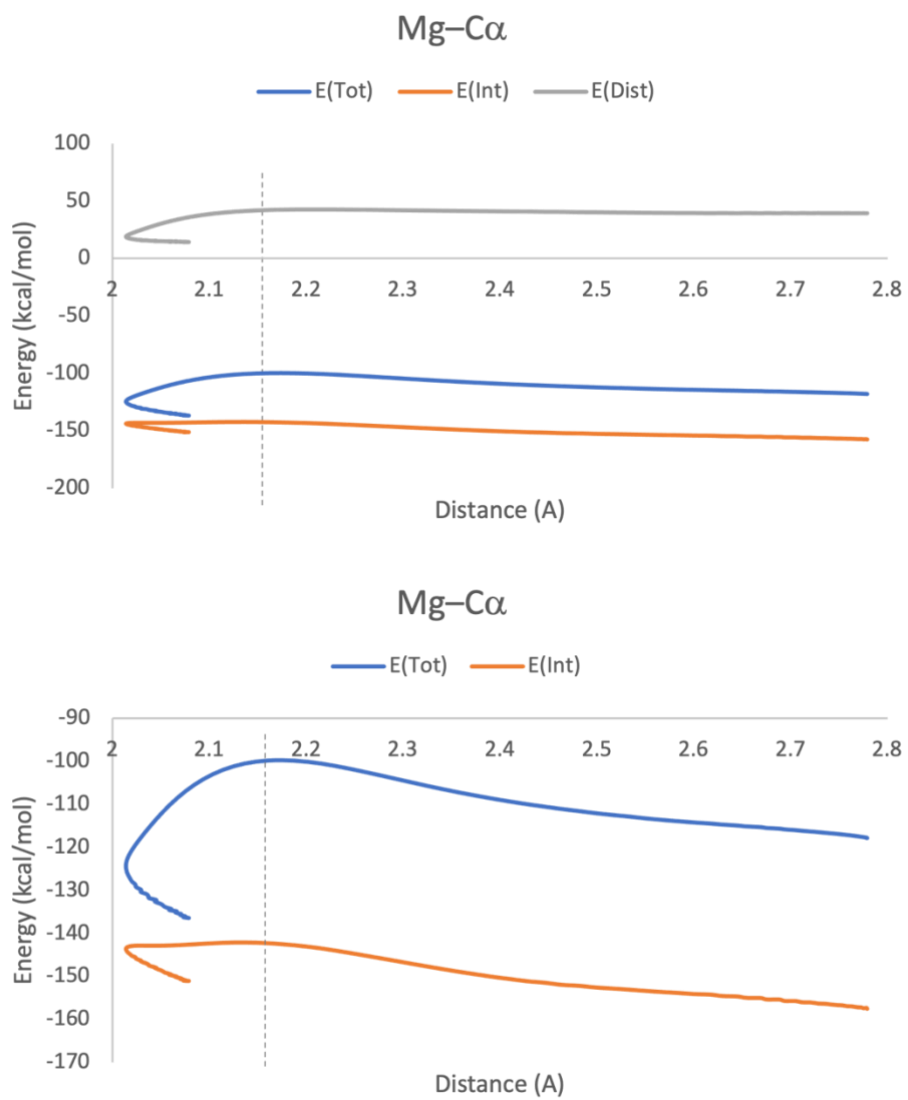

**Figure S88.** Activation Strain Analysis plot for TS-2 (Mg,  $n = 4$ ) along the Mg-C $\alpha$  bond. Transition state is noted as a dashed vertical line.

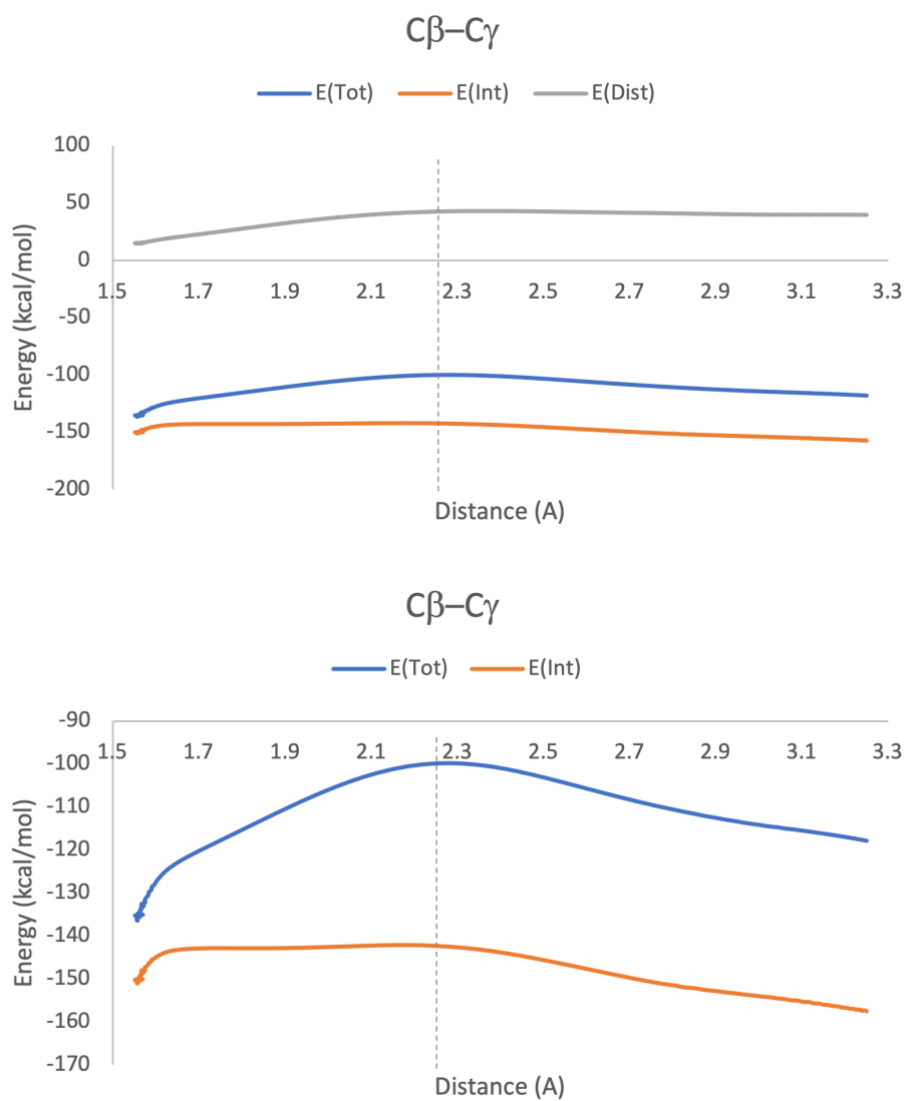

**Figure S89.** Activation Strain Analysis plot for **TS-2** (Mg,  $n = 4$ ) along the  $C\beta-C\gamma$  bond. Transition state is noted as a dashed vertical line.



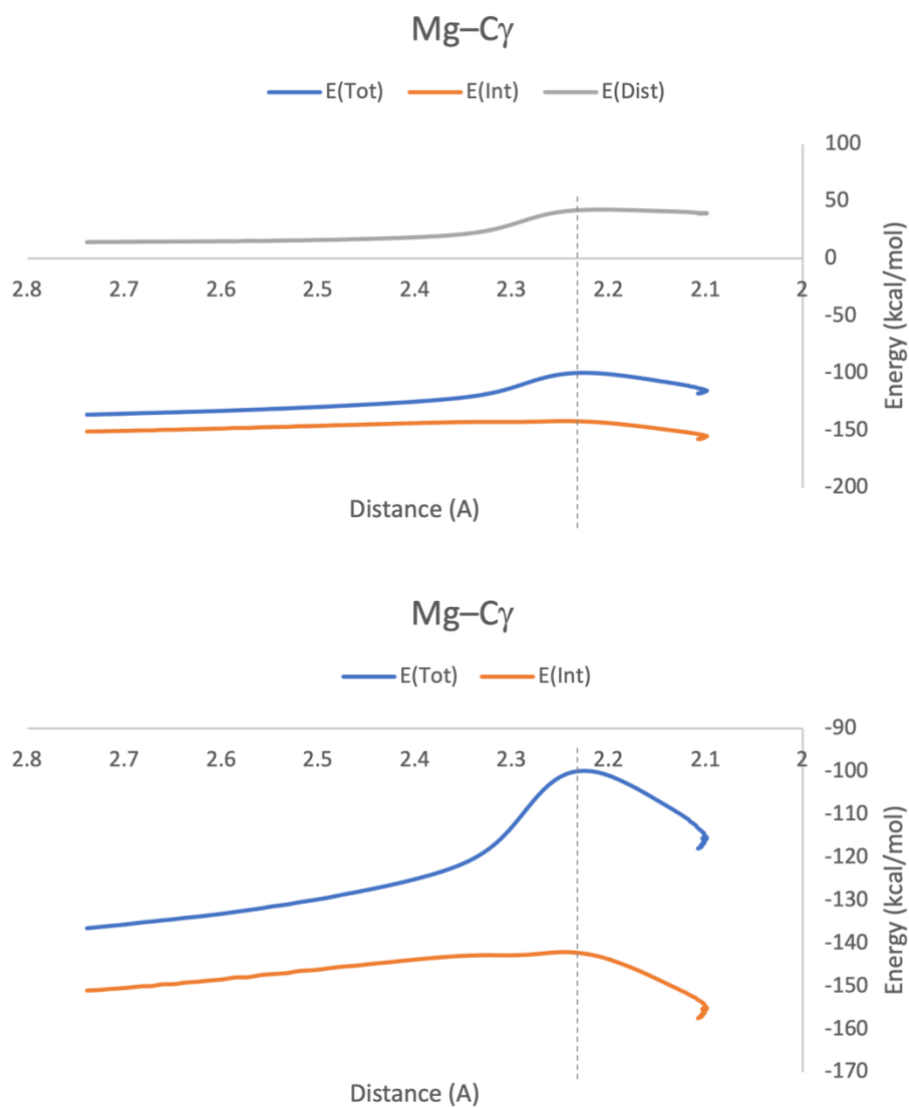

**Figure S90.** Activation Strain Analysis plot for **TS-2** (Mg,  $n = 4$ ) along the Mg-C $\gamma$  bond. Transition state is noted as a dashed vertical line.

**Non-covalent interactions (NCI) plots**

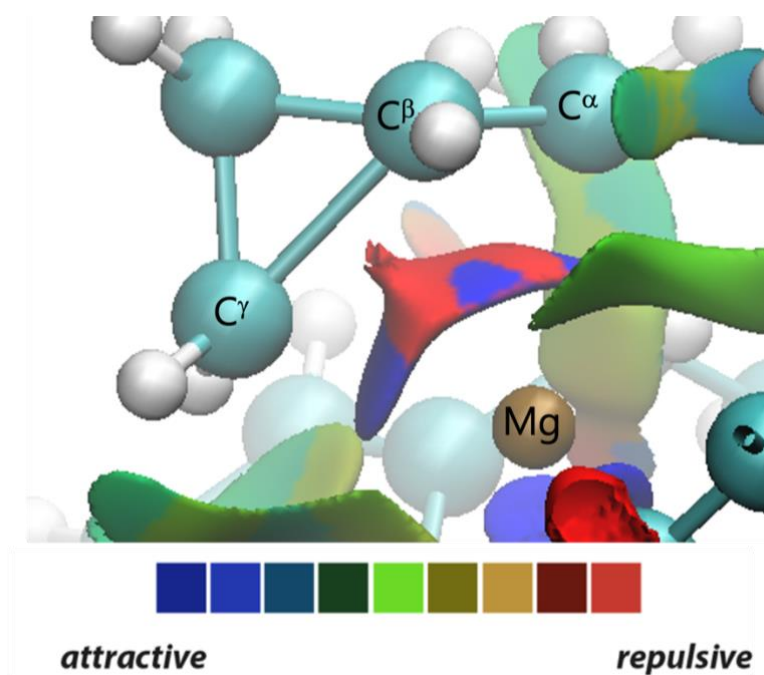

**Figure S91.** NCI plot for TS-2 (Mg,  $n = 1$ ).

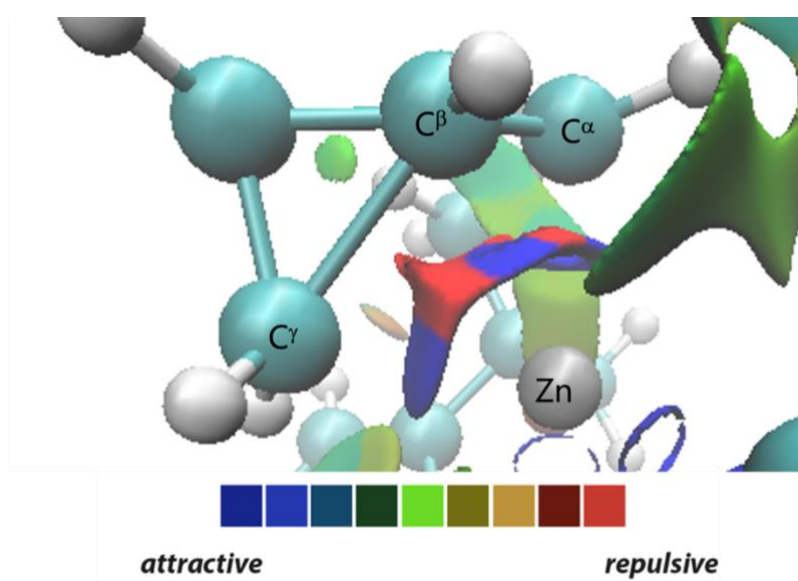

**Figure S92.** NCI plot for TS-2 (Zn,  $n = 1$ ).

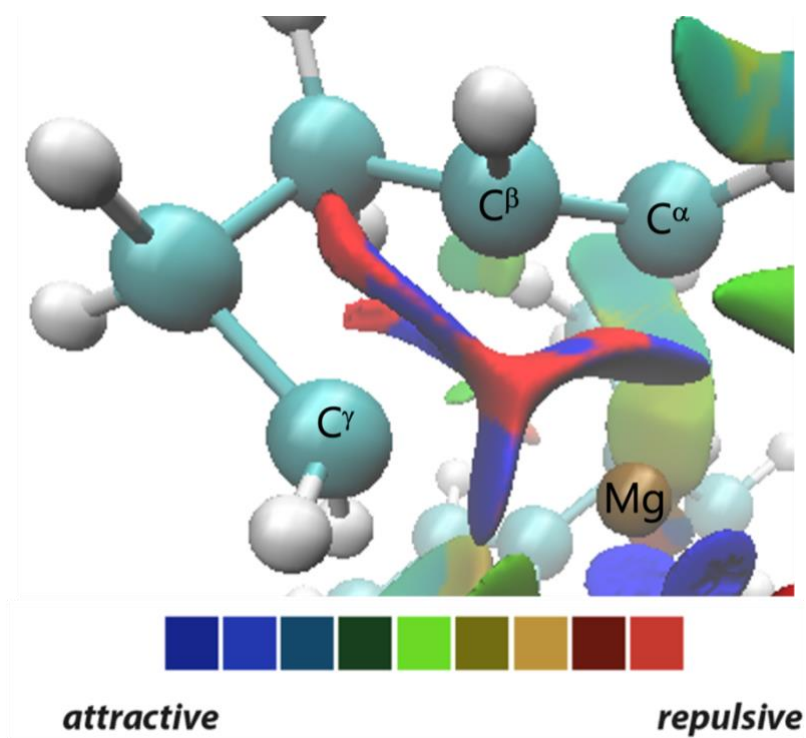

Figure S93. NCI plot for TS-2 (Mg,  $n = 2$ ).

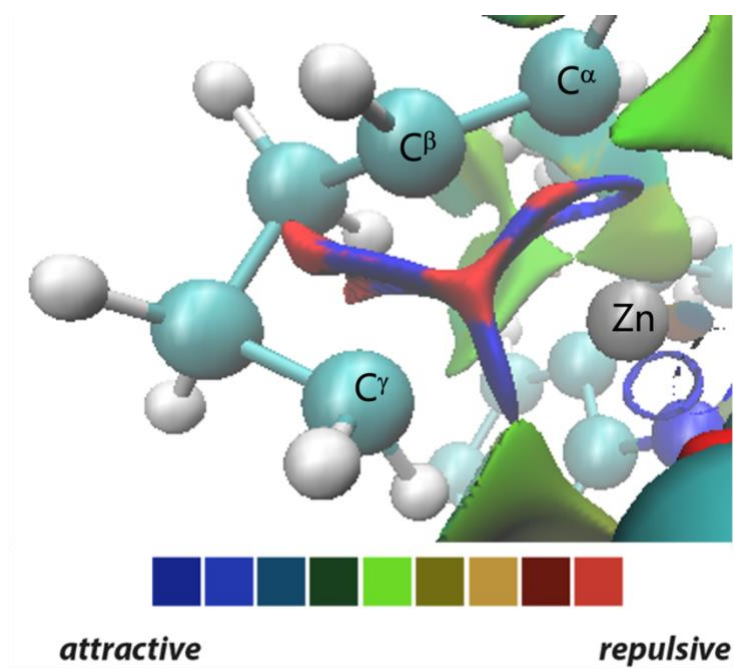

Figure S94. NCI plot for TS-2 (Zn,  $n = 2$ ).

## Computational coordinates

1.log

SCF (wB97x) = -1240.52016510  
E(SCF)+ZPE(0 K)= -1239.870609  
H(298 K)= -1239.833784  
G(298 K)= -1239.938913  
Lowest Frequency = 11.9394cm<sup>-1</sup>

|    |           |           |           |
|----|-----------|-----------|-----------|
| Mg | 5.933331  | 1.002748  | 0.938104  |
| N  | 6.027005  | 2.968153  | 1.423556  |
| C  | 5.180099  | 5.244226  | 1.788126  |
| H  | 5.931262  | 5.423272  | 2.561262  |
| H  | 4.249685  | 5.735771  | 2.073414  |
| H  | 5.552380  | 5.713270  | 0.871286  |
| N  | 3.938367  | 0.929866  | 1.260672  |
| C  | 4.971225  | 3.761264  | 1.562780  |
| C  | 3.638062  | 3.312384  | 1.512816  |
| H  | 2.881439  | 4.078998  | 1.622900  |
| C  | 3.161092  | 1.992078  | 1.439737  |
| C  | 1.672656  | 1.787641  | 1.611886  |
| H  | 1.260926  | 1.222141  | 0.770558  |
| H  | 1.145867  | 2.738525  | 1.693337  |
| H  | 1.475662  | 1.198041  | 2.513024  |
| C  | 7.337382  | 3.494433  | 1.631496  |
| C  | 7.961651  | 3.264101  | 2.874525  |
| C  | 9.247080  | 3.769875  | 3.071528  |
| H  | 9.745298  | 3.617520  | 4.023149  |
| C  | 9.911554  | 4.454760  | 2.062254  |
| H  | 10.912260 | 4.838483  | 2.234301  |
| C  | 9.303575  | 4.624958  | 0.826269  |
| H  | 9.843576  | 5.131530  | 0.031956  |
| C  | 8.015021  | 4.147462  | 0.586152  |
| C  | 7.249898  | 2.482232  | 3.972634  |
| H  | 6.600786  | 1.744972  | 3.483417  |
| C  | 8.209328  | 1.701543  | 4.875431  |
| H  | 8.793481  | 2.366063  | 5.520792  |
| H  | 8.904595  | 1.093596  | 4.289740  |
| H  | 7.642724  | 1.034845  | 5.532386  |
| C  | 6.329234  | 3.378040  | 4.813454  |
| H  | 6.901757  | 4.186383  | 5.281287  |
| H  | 5.852027  | 2.794401  | 5.608082  |
| H  | 5.536683  | 3.823729  | 4.207532  |
| C  | 7.395157  | 4.263537  | -0.797896 |
| H  | 6.317646  | 4.103199  | -0.698689 |
| C  | 7.594705  | 5.642127  | -1.436838 |
| H  | 7.256658  | 6.444105  | -0.773009 |
| H  | 7.029101  | 5.709948  | -2.371262 |
| H  | 8.645519  | 5.830513  | -1.679824 |
| C  | 7.938915  | 3.150875  | -1.707612 |
| H  | 9.018934  | 3.264152  | -1.850514 |
| H  | 7.459312  | 3.183060  | -2.691628 |
| H  | 7.770693  | 2.159276  | -1.273081 |
| C  | 3.380790  | -0.380836 | 1.372898  |
| C  | 3.389964  | -1.012892 | 2.631072  |
| C  | 2.931185  | -2.327176 | 2.719453  |
| H  | 2.938437  | -2.833079 | 3.680793  |
| C  | 2.474895  | -3.003373 | 1.595500  |
| H  | 2.124845  | -4.027307 | 1.680781  |
| C  | 2.474568  | -2.367720 | 0.360954  |
| H  | 2.125502  | -2.905610 | -0.515773 |
| C  | 2.923076  | -1.053490 | 0.225926  |
| C  | 3.935106  | -0.303373 | 3.862322  |
| H  | 4.039789  | 0.758618  | 3.620724  |

|   |          |           |           |
|---|----------|-----------|-----------|
| C | 2.994830 | -0.401577 | 5.068866  |
| H | 2.902017 | -1.430645 | 5.431226  |
| H | 1.991619 | -0.042713 | 4.819722  |
| H | 3.377663 | 0.203755  | 5.896702  |
| C | 5.332911 | -0.834506 | 4.211614  |
| H | 5.292043 | -1.897189 | 4.473297  |
| H | 5.753286 | -0.289399 | 5.063385  |
| H | 6.027592 | -0.738142 | 3.368571  |
| C | 2.958099 | -0.387123 | -1.140070 |
| H | 3.115100 | 0.684134  | -0.980831 |
| C | 1.642590 | -0.545629 | -1.911081 |
| H | 1.456073 | -1.588794 | -2.186599 |
| H | 1.675300 | 0.035435  | -2.838007 |
| H | 0.789123 | -0.198598 | -1.320255 |
| C | 4.145389 | -0.912905 | -1.960754 |
| H | 5.093876 | -0.777392 | -1.429459 |
| H | 4.211714 | -0.396025 | -2.923985 |
| H | 4.033136 | -1.984679 | -2.157506 |
| H | 7.112800 | -0.145412 | 0.447202  |

2.log

SCF (wB97x) = -1466.80367503  
E(SCF)+ZPE(0 K)= -1466.152900  
H(298 K)= -1466.116143  
G(298 K)= -1466.220198  
Lowest Frequency = 20.1802cm<sup>-1</sup>

|    |           |          |           |
|----|-----------|----------|-----------|
| Zn | 5.883372  | 1.048903 | 1.011224  |
| N  | 6.015087  | 2.970617 | 1.434656  |
| C  | 5.185782  | 5.246498 | 1.815577  |
| H  | 5.931215  | 5.416874 | 2.596154  |
| H  | 4.256549  | 5.743881 | 2.094589  |
| H  | 5.569829  | 5.715119 | 0.903550  |
| N  | 3.937952  | 0.944523 | 1.278898  |
| C  | 4.964467  | 3.766741 | 1.585871  |
| C  | 3.631359  | 3.322144 | 1.544308  |
| H  | 2.875623  | 4.087733 | 1.665390  |
| C  | 3.158029  | 2.003142 | 1.462803  |
| C  | 1.670789  | 1.788923 | 1.627900  |
| H  | 1.266213  | 1.222163 | 0.784107  |
| H  | 1.140223  | 2.738019 | 1.706459  |
| H  | 1.471978  | 1.198934 | 2.528207  |
| C  | 7.332633  | 3.484298 | 1.623664  |
| C  | 7.971264  | 3.254867 | 2.858902  |
| C  | 9.259484  | 3.760637 | 3.036142  |
| H  | 9.771091  | 3.609014 | 3.980753  |
| C  | 9.909923  | 4.443545 | 2.016208  |
| H  | 10.912775 | 4.827997 | 2.173974  |
| C  | 9.285678  | 4.611209 | 0.787966  |
| H  | 9.814889  | 5.116007 | -0.014582 |
| C  | 7.993843  | 4.133309 | 0.566534  |
| C  | 7.276394  | 2.467090 | 3.963417  |
| H  | 6.639546  | 1.718705 | 3.476920  |
| C  | 8.251302  | 1.700179 | 4.861353  |
| H  | 8.827704  | 2.371472 | 5.507037  |
| H  | 8.953310  | 1.104235 | 4.271457  |
| H  | 7.696188  | 1.022406 | 5.516965  |
| C  | 6.349870  | 3.350929 | 4.810494  |
| H  | 6.913617  | 4.168223 | 5.273689  |
| H  | 5.887709  | 2.760823 | 5.609247  |
| H  | 5.544937  | 3.784368 | 4.212012  |
| C  | 7.353631  | 4.240325 | -0.808929 |
| H  | 6.274906  | 4.103733 | -0.691326 |

C 7.571925 5.602580 -1.475483  
H 7.264324 6.423593 -0.820010  
H 6.990013 5.666484 -2.400119  
H 8.621653 5.763129 -1.742205  
C 7.857429 3.098853 -1.705453  
H 8.938765 3.180120 -1.860507  
H 7.368195 3.128730 -2.684780  
H 7.660452 2.122805 -1.250270  
C 3.391446 -0.371452 1.376180  
C 3.382931 -1.007926 2.631209  
C 2.926207 -2.323904 2.703749  
H 2.919823 -2.835768 3.661891  
C 2.489455 -2.994211 1.568518  
H 2.140496 -4.019480 1.642324  
C 2.505054 -2.351024 0.337855  
H 2.169681 -2.884059 -0.547071  
C 2.952102 -1.034924 0.217821  
C 3.906160 -0.304160 3.875182  
H 4.009443 0.759834 3.642676  
C 2.948225 -0.416094 5.066544  
H 2.857301 -1.447990 5.421356  
H 1.945899 -0.062635 4.805820  
H 3.315106 0.186331 5.903682  
C 5.302454 -0.828529 4.239973  
H 5.263724 -1.892572 4.497329  
H 5.706703 -0.284359 5.100512  
H 6.002537 -0.718314 3.404654  
C 3.008081 -0.356939 -1.141517  
H 3.144600 0.715084 -0.970688  
C 1.715285 -0.531518 -1.946268  
H 1.555011 -1.574612 -2.238273  
H 1.760259 0.060506 -2.865742  
H 0.840971 -0.206904 -1.373335  
C 4.225503 -0.854685 -1.934378  
H 5.153902 -0.692662 -1.377469  
H 4.302892 -0.334220 -2.894834  
H 4.142138 -1.928561 -2.134687  
H 6.951621 0.006322 0.650400

3a.log

SCF (wB97x) = -155.913909931  
E(SCF)+ZPE(0 K)= -155.827768  
H(298 K)= -155.822589  
G(298 K)= -155.853798  
Lowest Frequency = 300.6872cm-1

C -2.724443 0.393765 -1.756470  
C -3.968566 0.476932 -2.186631  
C -5.038740 1.296625 -2.765243  
C -5.256158 -0.185095 -2.422784  
H -2.324849 -0.537543 -1.365827  
H -4.977650 1.569504 -3.815761  
H -5.526311 2.038026 -2.137227  
H -5.338295 -0.888329 -3.247723  
H -5.886977 -0.419955 -1.569155  
H -2.061897 1.254038 -1.779846

3b.log

SCF (wB97x) = -195.240200641  
E(SCF)+ZPE(0 K)= -195.124007  
H(298 K)= -195.117990

G(298 K)= -195.151960  
Lowest Frequency = 94.6863cm-1

C -2.921105 0.394177 -1.879645  
C -4.184434 0.489308 -2.269846  
C -5.009484 1.595000 -2.904738  
C -6.012704 0.503469 -3.370425  
C -5.318574 -0.509894 -2.418367  
H -2.513678 -0.541605 -1.507796  
H -4.522835 2.197351 -3.676834  
H -5.444440 2.270225 -2.159537  
H -5.873962 0.240196 -4.421609  
H -7.071889 0.700255 -3.191813  
H -5.064670 -1.493125 -2.824041  
H -5.873467 -0.651718 -1.484349  
H -2.251200 1.248249 -1.921515

3c.log

SCF (wB97x) = -234.578529852  
E(SCF)+ZPE(0 K)= -234.431900  
H(298 K)= -234.425141  
G(298 K)= -234.461288  
Lowest Frequency = 69.6322cm-1

C -5.084546 -0.160710 -0.050762  
C -3.575444 -0.000886 -0.144441  
C -3.248939 1.483619 -0.180114  
C -4.562503 2.177755 0.213642  
C -5.641073 1.240676 -0.348719  
H -5.466862 -0.934841 -0.722031  
H -5.354153 -0.457357 0.971198  
H -2.405921 1.743461 0.466268  
H -2.971296 1.768409 -1.203316  
H -4.648017 2.223359 1.305969  
H -4.638400 3.199852 -0.166656  
H -6.629565 1.411011 0.085912  
H -5.725974 1.386259 -1.432314  
C -2.690300 -0.992471 -0.187474  
H -1.622269 -0.799079 -0.234922  
H -3.001991 -2.033192 -0.176725

3d.log

SCF (wB97x) = -273.893114480  
E(SCF)+ZPE(0 K)= -273.716265  
H(298 K)= -273.708769  
G(298 K)= -273.746421  
Lowest Frequency = 123.6942cm-1

C -4.142119 -1.314162 -0.178892  
C -2.637334 -1.309963 -0.296781  
C -2.013629 0.059714 -0.181358  
C -2.470187 0.764319 1.106583  
C -3.997954 0.800592 1.206950  
C -4.594215 -0.606669 1.109043  
H -0.921982 -0.009331 -0.218830  
H -4.567728 -0.776714 -1.039156  
H -4.528782 -2.337436 -0.214689  
H -2.063861 0.222925 1.970544  
H -2.060410 1.779449 1.142962  
H -4.304272 1.276867 2.144531  
H -4.398644 1.419878 0.392289

H -4.266859 -1.199000 1.973116  
H -5.687963 -0.561989 1.147067  
H -2.329500 0.667929 -1.041796  
C -1.919547 -2.422188 -0.445767  
H -0.835279 -2.394004 -0.512999  
H -2.391697 -3.398783 -0.511241

4a.log

SCF (wB97x) = -1396.50748940  
E(SCF)+ZPE(0 K)= -1395.763733  
H(298 K)= -1395.722260  
G(298 K)= -1395.836889  
Lowest Frequency = 15.3103cm-1

Mg 0.347522 -0.001801 -0.218917  
N 0.376553 1.966432 0.251850  
C -0.473349 4.147600 0.964497  
H 0.255505 4.249172 1.774684  
H -1.408153 4.618938 1.268415  
H -0.065324 4.690692 0.106204  
N -1.634143 -0.152331 0.183556  
C -0.672722 2.687875 0.622654  
C -1.980246 2.177208 0.723179  
H -2.741902 2.891143 1.010440  
C -2.425986 0.858586 0.522490  
C -3.903055 0.594580 0.714583  
H -4.442448 1.506417 0.971309  
H -4.062371 -0.144999 1.505545  
H -4.333177 0.173304 -0.199516  
C 1.671513 2.563978 0.190330  
C 2.538327 2.437071 1.290317  
C 3.833267 2.945977 1.180295  
H 4.517895 2.850998 2.018465  
C 4.263929 3.561176 0.013189  
H 5.274694 3.950793 -0.056436  
C 3.400807 3.666982 -1.070918  
H 3.750922 4.136417 -1.985181  
C 2.099256 3.171263 -1.006024  
C 2.104188 1.709533 2.553691  
H 1.022804 1.552202 2.492065  
C 2.770866 0.327212 2.626473  
H 3.858280 0.425003 2.714660  
H 2.572084 -0.261832 1.723909  
H 2.407931 -0.236518 3.492269  
C 2.373077 2.521037 3.825909  
H 3.444941 2.666677 3.995771  
H 1.970446 2.000200 4.700436  
H 1.905681 3.509028 3.771902  
C 1.183513 3.219189 -2.219861  
H 0.152933 3.124946 -1.864874  
C 1.275839 4.534881 -2.999350  
H 1.125148 5.397771 -2.343409  
H 0.511310 4.562664 -3.781915  
H 2.246832 4.652056 -3.491625  
C 1.463455 2.019440 -3.138776  
H 2.480138 2.074426 -3.542370  
H 0.761421 1.997888 -3.979037  
H 1.385072 1.067183 -2.601769  
C -2.170184 -1.469885 0.058692  
C -2.202428 -2.308874 1.190144  
C -2.609919 -3.631452 1.024014  
H -2.635290 -4.296862 1.881244

C -2.978149 -4.118032 -0.224789  
H -3.283480 -5.153571 -0.336293  
C -2.955846 -3.275816 -1.327007  
H -3.246242 -3.661166 -2.300349  
C -2.558789 -1.942786 -1.206697  
C -1.763887 -1.787525 2.551418  
H -1.922970 -0.704777 2.560357  
C -2.573772 -2.371970 3.713279  
H -2.362195 -3.435409 3.866073  
H -3.649392 -2.262926 3.544621  
H -2.319220 -1.855709 4.643969  
C -0.263188 -2.025012 2.768435  
H -0.033283 -3.095490 2.756236  
H 0.061815 -1.610770 3.728643  
H 0.341118 -1.564393 1.980971  
C -2.519686 -1.041545 -2.431070  
H -2.360588 -0.016444 -2.082449  
C -3.840010 -1.057734 -3.210533  
H -4.035210 -2.038280 -3.656982  
H -3.808747 -0.327044 -4.024914  
H -4.687123 -0.811458 -2.562987  
C -1.338347 -1.409860 -3.339941  
H -0.387762 -1.362515 -2.798846  
H -1.279230 -0.731133 -4.197301  
H -1.444726 -2.431217 -3.721665  
H 2.183451 -2.588235 0.891031  
C 1.856126 -1.312733 -0.882512  
C 1.853054 -2.643251 -0.147260  
C 2.181566 -3.945993 -0.832949  
C 0.763578 -3.651427 -0.399988  
H 1.716780 -1.514001 -1.957354  
H 2.731373 -4.709735 -0.289697  
H 2.405028 -3.903462 -1.895585  
H 0.350986 -4.212527 0.433187  
H 0.032312 -3.415391 -1.169705  
H 2.855735 -0.857489 -0.812783

4b.log

SCF (wB97x) = -1435.82069030  
E(SCF)+ZPE(0 K)= -1435.047329  
H(298 K)= -1435.004931  
G(298 K)= -1435.122025  
Lowest Frequency = 11.1541cm-1

Mg 0.292155 -0.021593 -0.274071  
N 0.354024 1.941341 0.216516  
C -0.460443 4.132937 0.940058  
H 0.273755 4.216967 1.747202  
H -1.386872 4.615164 1.252428  
H -0.048938 4.677578 0.084345  
N -1.683365 -0.151479 0.161666  
C -0.682742 2.679221 0.586818  
C -1.999388 2.188967 0.678502  
H -2.751942 2.915109 0.959101  
C -2.460708 0.873892 0.494876  
C -3.938233 0.628277 0.707793  
H -4.469085 1.553994 0.930439  
H -4.095744 -0.075166 1.531565  
H -4.378918 0.170972 -0.183565  
C 1.663914 2.507452 0.184030  
C 2.518316 2.317907 1.284418  
C 3.825435 2.801358 1.204053

H 4.499378 2.660212 2.044640  
 C 4.280995 3.448593 0.064499  
 H 5.300850 3.817356 0.017790  
 C 3.430759 3.612119 -1.022852  
 H 3.800488 4.104281 -1.917202  
 C 2.117764 3.145184 -0.986846  
 C 2.061117 1.561570 2.522809  
 H 0.989672 1.363286 2.416741  
 C 2.777389 0.206356 2.620378  
 H 3.857134 0.342636 2.743649  
 H 2.625144 -0.391454 1.715131  
 H 2.408904 -0.367353 3.477125  
 C 2.245598 2.380010 3.806166  
 H 3.303081 2.580628 4.007733  
 H 1.842979 1.835880 4.666521  
 H 1.729737 3.342815 3.739772  
 C 1.217089 3.252719 -2.207956  
 H 0.180506 3.172707 -1.867344  
 C 1.349795 4.588414 -2.946411  
 H 1.214017 5.434912 -2.266202  
 H 0.594147 4.658769 -3.734895  
 H 2.328262 4.695937 -3.425888  
 C 1.478758 2.073804 -3.158515  
 H 2.501762 2.114461 -3.547533  
 H 0.787590 2.095041 -4.007764  
 H 1.369005 1.109399 -2.649783  
 C -2.235182 -1.466330 0.089481  
 C -2.271796 -2.260376 1.253249  
 C -2.713345 -3.578109 1.144801  
 H -2.745746 -4.208548 2.027727  
 C -3.097972 -4.106699 -0.082120  
 H -3.426558 -5.138879 -0.150076  
 C -3.058425 -3.312168 -1.218537  
 H -3.358220 -3.732082 -2.174431  
 C -2.638115 -1.982546 -1.153952  
 C -1.777085 -1.705281 2.581019  
 H -1.904228 -0.618595 2.558719  
 C -2.558868 -2.227777 3.790222  
 H -2.372338 -3.291544 3.970647  
 H -3.636412 -2.091901 3.657194  
 H -2.255284 -1.689509 4.693295  
 C -0.276019 -1.982969 2.748550  
 H -0.080102 -3.060340 2.768925  
 H 0.101845 -1.544194 3.677893  
 H 0.311715 -1.570738 1.921304  
 C -2.595630 -1.127130 -2.410755  
 H -2.449238 -0.088749 -2.097554  
 C -3.908751 -1.182031 -3.200522  
 H -4.088860 -2.176895 -3.620824  
 H -3.878244 -0.474883 -4.035408  
 H -4.764149 -0.926820 -2.567509  
 C -1.403747 -1.516213 -3.297023  
 H -0.455072 -1.432491 -2.756351  
 H -1.351319 -0.874419 -4.182838  
 H -1.493497 -2.554782 -3.634150  
 H 2.073656 -2.598577 0.759577  
 C 1.858731 -1.264171 -0.934609  
 C 1.905135 -2.658776 -0.326713  
 C 2.848806 -3.758455 -0.893758  
 C 1.736992 -4.796606 -0.624905  
 C 0.724361 -3.630118 -0.582619  
 H 1.821068 -1.370013 -2.032087  
 H 3.822154 -3.903518 -0.414972

H 3.003568 -3.607853 -1.968305  
 H 1.851596 -5.262124 0.359406  
 H 1.579176 -5.584458 -1.366566  
 H -0.088714 -3.671024 0.148044  
 H 0.288366 -3.448937 -1.571968  
 H 2.808779 -0.741315 -0.735145

4c.log

SCF (wB97x) = -1475.15526088  
 E(SCF)+ZPE(0 K)= -1474.351952  
 H(298 K)= -1474.308454  
 G(298 K)= -1474.428378  
 Lowest Frequency = 15.1988cm-1

Mg 6.014093 14.904442 4.377551  
 N 7.178024 16.433985 3.724137  
 N 7.241073 13.520853 3.552835  
 C 8.351281 16.297126 3.115088  
 C 8.916526 15.061037 2.757210  
 H 9.875486 15.110669 2.256862  
 C 8.382653 13.769273 2.927508  
 C 9.138703 17.540674 2.765715  
 H 8.573455 18.170607 2.071480  
 H 10.098228 17.291942 2.312014  
 H 9.314707 18.142193 3.663008  
 C 9.171564 12.613917 2.352857  
 H 9.458755 11.914170 3.144150  
 H 10.071526 12.957971 1.842845  
 H 8.555221 12.050785 1.645372  
 C 6.649699 17.737247 3.968806  
 C 6.826212 18.330324 5.230753  
 C 6.177026 19.537067 5.496629  
 H 6.287641 19.999516 6.473258  
 C 5.385170 20.151050 4.537137  
 H 4.882770 21.086413 4.762190  
 C 5.233561 19.563021 3.286811  
 H 4.608450 20.048849 2.544391  
 C 5.854337 18.352680 2.981275  
 C 7.665888 17.656788 6.304622  
 H 8.231334 16.851754 5.825242  
 C 6.767361 17.019600 7.374679  
 H 6.177055 17.784674 7.890791  
 H 7.367176 16.490181 8.122514  
 H 6.058828 16.308708 6.936136  
 C 8.684320 18.611846 6.937979  
 H 9.313937 19.082618 6.176735  
 H 9.334199 18.067545 7.630376  
 H 8.194741 19.409040 7.506851  
 C 5.616339 17.667496 1.643613  
 H 6.471791 17.015479 1.442219  
 C 6.750429 12.184102 3.650785  
 C 5.798987 11.734756 2.718219  
 C 5.261547 10.456383 2.878181  
 H 4.522847 10.095235 2.167798  
 C 5.646438 9.644562 3.935480  
 H 5.217560 8.653562 4.046239  
 C 6.574034 10.109390 4.860335  
 H 6.856900 9.474541 5.694448  
 C 7.136814 11.379055 4.739896  
 C 5.317882 12.625789 1.582728  
 H 5.929239 13.533910 1.588217  
 C 5.497865 11.966590 0.210088

|                                |          |           |           |   |           |           |           |
|--------------------------------|----------|-----------|-----------|---|-----------|-----------|-----------|
| H                              | 6.539307 | 11.674361 | 0.044154  | H | 9.568764  | 12.140017 | 3.034415  |
| H                              | 5.206763 | 12.658753 | -0.586521 | H | 10.036111 | 13.332092 | 1.802152  |
| H                              | 4.878922 | 11.068752 | 0.110177  | H | 8.657769  | 12.240652 | 1.537313  |
| C                              | 3.858380 | 13.046929 | 1.809711  | C | 5.986247  | 17.465490 | 4.163017  |
| H                              | 3.193285 | 12.176814 | 1.795657  | C | 6.066821  | 18.001603 | 5.459752  |
| H                              | 3.527379 | 13.738145 | 1.027629  | C | 5.239155  | 19.076008 | 5.789467  |
| H                              | 3.731747 | 13.539366 | 2.779857  | H | 5.275297  | 19.489892 | 6.793107  |
| C                              | 8.088836 | 11.914392 | 5.798669  | C | 4.361146  | 19.615072 | 4.860190  |
| H                              | 8.666831 | 12.727146 | 5.348894  | H | 3.718474  | 20.445417 | 5.135195  |
| C                              | 7.291031 | 12.512653 | 6.968065  | C | 4.304063  | 19.086834 | 3.575753  |
| H                              | 6.581814 | 13.275852 | 6.628262  | H | 3.609896  | 19.511890 | 2.857811  |
| H                              | 7.960109 | 12.969003 | 7.705280  | C | 5.108180  | 18.010358 | 3.204529  |
| H                              | 6.705759 | 11.735234 | 7.470651  | C | 6.987148  | 17.391993 | 6.504845  |
| C                              | 9.090561 | 10.869351 | 6.300122  | H | 7.664733  | 16.705489 | 5.987786  |
| H                              | 8.601077 | 10.074187 | 6.871953  | C | 6.179120  | 16.570655 | 7.520565  |
| H                              | 9.824182 | 11.339121 | 6.962541  | H | 5.487915  | 17.213710 | 8.076269  |
| H                              | 9.629156 | 10.403014 | 5.469393  | H | 6.842077  | 16.080222 | 8.241144  |
| C                              | 4.213883 | 14.584237 | 5.422374  | H | 5.574984  | 15.800636 | 7.028597  |
| H                              | 3.911340 | 13.540657 | 5.234157  | C | 7.853276  | 18.442662 | 7.209053  |
| H                              | 4.384165 | 14.629666 | 6.512061  | H | 8.418409  | 19.039759 | 6.486788  |
| C                              | 1.922146 | 17.668032 | 5.299519  | H | 8.565834  | 17.956743 | 7.882967  |
| H                              | 1.760102 | 18.051710 | 4.285855  | H | 7.249318  | 19.129559 | 7.811027  |
| H                              | 1.832255 | 18.523642 | 5.975175  | C | 4.983354  | 17.381133 | 1.824807  |
| C                              | 0.893733 | 16.545274 | 5.622430  | H | 5.925308  | 16.871390 | 1.600590  |
| H                              | 0.273740 | 16.791153 | 6.489724  | C | 6.843115  | 12.010807 | 3.522766  |
| H                              | 0.209625 | 16.403221 | 4.779244  | C | 5.961162  | 11.494254 | 2.557316  |
| C                              | 1.733552 | 15.273932 | 5.855563  | C | 5.601934  | 10.147561 | 2.636197  |
| H                              | 1.223710 | 14.357392 | 5.541551  | H | 4.919151  | 9.733400  | 1.899274  |
| H                              | 1.972676 | 15.162131 | 6.921764  | C | 6.092721  | 9.332935  | 3.646433  |
| C                              | 4.370706 | 16.772572 | 1.720458  | H | 5.802111  | 8.288162  | 3.693965  |
| H                              | 4.458292 | 16.015901 | 2.507511  | C | 6.947555  | 9.862550  | 4.605973  |
| H                              | 4.204889 | 16.248798 | 0.773324  | H | 7.312620  | 9.223114  | 5.403880  |
| H                              | 3.479251 | 17.366050 | 1.950268  | C | 7.332956  | 11.201568 | 4.566203  |
| C                              | 5.504962 | 18.644922 | 0.469400  | C | 5.363263  | 12.378654 | 1.473318  |
| H                              | 4.589221 | 19.243130 | 0.519289  | H | 5.839584  | 13.361920 | 1.543522  |
| H                              | 5.478779 | 18.093461 | -0.475384 | C | 5.641657  | 11.840077 | 0.064915  |
| H                              | 6.355905 | 19.332160 | 0.440904  | H | 6.714895  | 11.710455 | -0.105022 |
| C                              | 3.045787 | 15.516428 | 5.090432  | H | 5.257837  | 12.532627 | -0.691052 |
| H                              | 2.807829 | 15.437446 | 4.015004  | H | 5.158083  | 10.871230 | -0.098384 |
| C                              | 3.302805 | 16.998839 | 5.391572  | C | 3.857680  | 12.573788 | 1.706197  |
| H                              | 4.036772 | 17.456807 | 4.722749  | H | 3.322661  | 11.621206 | 1.628965  |
| H                              | 3.702506 | 17.082267 | 6.411876  | H | 3.435694  | 13.259422 | 0.964012  |
| 4d.log                         |          |           |           | H | 3.658198  | 12.981438 | 2.703006  |
| SCF (wB97x) = -1514.47257144   |          |           |           | C | 8.199557  | 11.797517 | 5.665086  |
| E(SCF)+ZPE(0 K)= -1513.639049  |          |           |           | H | 8.660242  | 12.708116 | 5.270775  |
| H(298 K)= -1513.595042         |          |           |           | C | 7.323492  | 12.208463 | 6.859075  |
| G(298 K)= -1513.714661         |          |           |           | H | 6.516320  | 12.885387 | 6.557026  |
| Lowest Frequency = 15.6656cm-1 |          |           |           | H | 7.920886  | 12.707859 | 7.629235  |
|                                |          |           |           | H | 6.850108  | 11.329014 | 7.308515  |
|                                |          |           |           | C | 9.334847  | 10.872201 | 6.114250  |
|                                |          |           |           | H | 8.958657  | 9.983725  | 6.631888  |
| Mg                             | 5.740881 | 14.557472 | 4.397323  | H | 9.994447  | 11.397563 | 6.811826  |
| N                              | 6.694248 | 16.265726 | 3.852792  | H | 9.935229  | 10.536257 | 5.263154  |
| N                              | 7.149462 | 13.404763 | 3.509219  | C | 3.995947  | 13.918572 | 5.389572  |
| C                              | 7.878327 | 16.325948 | 3.252906  | H | 3.862595  | 12.851362 | 5.143560  |
| C                              | 8.607202 | 15.201167 | 2.830081  | H | 4.147263  | 13.928180 | 6.483135  |
| H                              | 9.553460 | 15.409259 | 2.346618  | C | 3.878226  | 16.315205 | 1.825160  |
| C                              | 8.250432 | 13.841509 | 2.915116  | H | 4.063135  | 15.533468 | 2.569854  |
| C                              | 8.490353 | 17.683712 | 2.988502  | H | 3.800771  | 15.829622 | 0.846837  |
| H                              | 7.847777 | 18.271644 | 2.325339  | H | 2.908312  | 16.761224 | 2.069793  |
| H                              | 9.477299 | 17.596112 | 2.533865  | C | 4.744594  | 18.403829 | 0.709499  |
| H                              | 8.577483 | 18.247885 | 3.922382  | H | 3.753141  | 18.863113 | 0.779748  |
| C                              | 9.190342 | 12.839630 | 2.282337  | H | 4.804680  | 17.913813 | -0.267100 |



|   |           |           |          |
|---|-----------|-----------|----------|
| H | 5.489960  | 19.204359 | 0.737120 |
| C | 0.167469  | 14.801585 | 5.455314 |
| C | 1.460632  | 14.039598 | 5.763390 |
| C | 2.690249  | 14.669391 | 5.088588 |
| C | 2.783399  | 16.150260 | 5.479059 |
| C | 1.501109  | 16.926850 | 5.176415 |
| C | 0.285100  | 16.278523 | 5.843203 |
| H | 1.629569  | 14.029557 | 6.850675 |
| H | 1.368867  | 12.991841 | 5.452743 |
| H | -0.043468 | 14.730315 | 4.378697 |
| H | -0.681772 | 14.339264 | 5.971802 |
| H | 3.002842  | 16.213978 | 6.555936 |
| H | 3.626585  | 16.624839 | 4.966900 |
| H | 1.608952  | 17.969739 | 5.495671 |
| H | 1.345781  | 16.947837 | 4.087689 |
| H | 0.393199  | 16.354565 | 6.934285 |
| H | -0.631515 | 16.818296 | 5.578539 |
| H | 2.499363  | 14.636235 | 4.001139 |

5a.log

SCF (wB97x) = -1622.79044855  
E(SCF)+ZPE(0 K)= -1622.046223  
H(298 K)= -1622.004582  
G(298 K)= -1622.120208  
Lowest Frequency = 11.4574cm<sup>-1</sup>

|    |           |           |           |
|----|-----------|-----------|-----------|
| Zn | 0.309053  | 0.009222  | -0.195395 |
| N  | 0.382391  | 1.935632  | 0.256184  |
| C  | -0.446337 | 4.123789  | 0.961447  |
| H  | 0.289039  | 4.224640  | 1.765548  |
| H  | -1.376585 | 4.601123  | 1.270208  |
| H  | -0.042673 | 4.660341  | 0.097079  |
| N  | -1.620264 | -0.163823 | 0.184002  |
| C  | -0.659285 | 2.664899  | 0.626879  |
| C  | -1.968043 | 2.161777  | 0.729255  |
| H  | -2.727615 | 2.876946  | 1.018394  |
| C  | -2.412413 | 0.845561  | 0.525097  |
| C  | -3.888366 | 0.576476  | 0.715540  |
| H  | -4.429059 | 1.489609  | 0.965019  |
| H  | -4.047742 | -0.156923 | 1.512050  |
| H  | -4.316195 | 0.148469  | -0.196099 |
| C  | 1.683663  | 2.515663  | 0.184049  |
| C  | 2.549093  | 2.397550  | 1.285706  |
| C  | 3.849271  | 2.889827  | 1.164533  |
| H  | 4.534177  | 2.800668  | 2.003180  |
| C  | 4.284999  | 3.480709  | -0.013492 |
| H  | 5.300516  | 3.856229  | -0.091601 |
| C  | 3.419616  | 3.582937  | -1.095764 |
| H  | 3.771690  | 4.035417  | -2.017990 |
| C  | 2.111713  | 3.104984  | -1.020131 |
| C  | 2.108095  | 1.702996  | 2.564948  |
| H  | 1.027873  | 1.541779  | 2.501977  |
| C  | 2.772779  | 0.323364  | 2.678826  |
| H  | 3.860539  | 0.420803  | 2.764728  |
| H  | 2.565049  | -0.287250 | 1.794467  |
| H  | 2.407620  | -0.213378 | 3.560719  |
| C  | 2.371660  | 2.550049  | 3.815141  |
| H  | 3.442909  | 2.701070  | 3.984663  |
| H  | 1.965995  | 2.053385  | 4.702293  |
| H  | 1.904446  | 3.536285  | 3.732887  |
| C  | 1.192227  | 3.160596  | -2.230605 |
| H  | 0.165072  | 3.034808  | -1.876118 |

|   |           |           |           |
|---|-----------|-----------|-----------|
| C | 1.256304  | 4.498716  | -2.974369 |
| H | 1.084446  | 5.340521  | -2.296379 |
| H | 0.493434  | 4.530145  | -3.758529 |
| H | 2.225989  | 4.651314  | -3.459523 |
| C | 1.493336  | 1.988753  | -3.177203 |
| H | 2.513097  | 2.063638  | -3.570244 |
| H | 0.799316  | 1.983453  | -4.024415 |
| H | 1.410256  | 1.028103  | -2.659006 |
| C | -2.149496 | -1.483277 | 0.054736  |
| C | -2.190791 | -2.319429 | 1.187322  |
| C | -2.595295 | -3.642660 | 1.017725  |
| H | -2.625792 | -4.307878 | 1.874981  |
| C | -2.956662 | -4.129255 | -0.233105 |
| H | -3.261635 | -5.164796 | -0.346265 |
| C | -2.931459 | -3.285954 | -1.334440 |
| H | -3.219720 | -3.669775 | -2.309184 |
| C | -2.533586 | -1.953280 | -1.212410 |
| C | -1.771152 | -1.798156 | 2.554793  |
| H | -1.916788 | -0.713570 | 2.557447  |
| C | -2.612997 | -2.368514 | 3.701003  |
| H | -2.416494 | -3.433533 | 3.862863  |
| H | -3.683787 | -2.248746 | 3.509492  |
| H | -2.372211 | -1.851134 | 4.634774  |
| C | -0.277605 | -2.049523 | 2.800816  |
| H | -0.056943 | -3.122205 | 2.784865  |
| H | 0.028550  | -1.647648 | 3.772558  |
| H | 0.337998  | -1.579691 | 2.029117  |
| C | -2.496317 | -1.052787 | -2.437158 |
| H | -2.287982 | -0.034855 | -2.094835 |
| C | -3.841160 | -1.023419 | -3.173911 |
| H | -4.087573 | -1.999942 | -3.603847 |
| H | -3.808648 | -0.300827 | -3.995538 |
| H | -4.657806 | -0.740033 | -2.502708 |
| C | -1.358574 | -1.462134 | -3.382345 |
| H | -0.394417 | -1.440359 | -2.866790 |
| H | -1.303792 | -0.784724 | -4.240961 |
| H | -1.510958 | -2.478715 | -3.761460 |
| H | 2.129835  | -2.487232 | 0.909901  |
| C | 1.739211  | -1.180172 | -0.823225 |
| C | 1.802525  | -2.526920 | -0.128424 |
| C | 2.212624  | -3.774549 | -0.869485 |
| C | 0.780593  | -3.587375 | -0.428019 |
| H | 1.592590  | -1.346733 | -1.899913 |
| H | 2.813814  | -4.518997 | -0.355584 |
| H | 2.432035  | -3.675910 | -1.929226 |
| H | 0.403419  | -4.200619 | 0.384405  |
| H | 0.035665  | -3.362543 | -1.186899 |
| H | 2.706231  | -0.666444 | -0.737253 |

5b.log

SCF (wB97x) = -1662.10368398  
E(SCF)+ZPE(0 K)= -1661.329203  
H(298 K)= -1661.286873  
G(298 K)= -1661.403336  
Lowest Frequency = 17.0553cm<sup>-1</sup>

|    |           |           |           |
|----|-----------|-----------|-----------|
| Zn | 0.254160  | -0.025913 | -0.252234 |
| N  | 0.364545  | 1.901950  | 0.217404  |
| C  | -0.425781 | 4.100733  | 0.936646  |
| H  | 0.315997  | 4.182059  | 1.736808  |
| H  | -1.346850 | 4.588765  | 1.256058  |
| H  | -0.019633 | 4.640586  | 0.075462  |

N -1.666462 -0.169867 0.157104  
 C -0.662779 2.648778 0.587959  
 C -1.981789 2.167744 0.679492  
 H -2.731624 2.895765 0.961890  
 C -2.442747 0.856267 0.491287  
 C -3.920176 0.607632 0.698549  
 H -4.451025 1.535024 0.914311  
 H -4.081568 -0.090916 1.525525  
 H -4.357056 0.146693 -0.192478  
 C 1.680886 2.448943 0.174780  
 C 2.534215 2.263570 1.276428  
 C 3.847466 2.727411 1.184993  
 H 4.521745 2.588792 2.025786  
 C 4.308719 3.352161 0.034923  
 H 5.334019 3.704366 -0.020523  
 C 3.455682 3.517811 -1.049510  
 H 3.827622 3.995463 -1.950947  
 C 2.135332 3.072043 -1.002722  
 C 2.068007 1.539627 2.530472  
 H 0.997558 1.339890 2.423393  
 C 2.777844 0.185429 2.668088  
 H 3.857753 0.318990 2.793994  
 H 2.621505 -0.432421 1.778542  
 H 2.400884 -0.363457 3.537344  
 C 2.250022 2.391664 3.792409  
 H 3.307412 2.594894 3.992290  
 H 1.842730 1.871578 4.665403  
 H 1.737436 3.354114 3.699622  
 C 1.229801 3.196323 -2.218583  
 H 0.195357 3.094460 -1.877970  
 C 1.345849 4.553409 -2.920491  
 H 1.198653 5.379977 -2.218293  
 H 0.590343 4.635229 -3.708099  
 H 2.323738 4.686532 -3.394769  
 C 1.500563 2.044096 -3.197595  
 H 2.527191 2.094216 -3.576428  
 H 0.817369 2.089792 -4.052343  
 H 1.376761 1.072460 -2.709395  
 C -2.215202 -1.485750 0.083497  
 C -2.264476 -2.273181 1.250643  
 C -2.707196 -3.590707 1.141693  
 H -2.748460 -4.218231 2.026328  
 C -3.083476 -4.122035 -0.086634  
 H -3.413449 -5.153878 -0.154106  
 C -3.038333 -3.329356 -1.224158  
 H -3.336214 -3.749377 -2.180765  
 C -2.615800 -2.000407 -1.160486  
 C -1.790659 -1.714058 2.584721  
 H -1.911533 -0.626844 2.555328  
 C -2.600628 -2.226708 3.779627  
 H -2.421082 -3.289917 3.970412  
 H -3.674940 -2.088785 3.623491  
 H -2.314148 -1.684032 4.685664  
 C -0.294213 -1.994589 2.782672  
 H -0.100346 -3.072614 2.799086  
 H 0.061007 -1.565181 3.725409  
 H 0.304057 -1.568063 1.971823  
 C -2.579404 -1.146011 -2.418012  
 H -2.391783 -0.113068 -2.110327  
 C -3.916977 -1.164102 -3.168164  
 H -4.139674 -2.155678 -3.575895  
 H -3.889991 -0.462586 -4.007994  
 H -4.745714 -0.879799 -2.512308

C -1.425583 -1.568153 -3.337565  
 H -0.463895 -1.491551 -2.822346  
 H -1.388223 -0.933614 -4.229283  
 H -1.546641 -2.606947 -3.664481  
 H 2.018733 -2.486639 0.787575  
 C 1.742360 -1.137869 -0.883997  
 C 1.845842 -2.537138 -0.296503  
 C 2.844427 -3.562585 -0.900681  
 C 1.793213 -4.668104 -0.655864  
 C 0.717528 -3.561736 -0.570050  
 H 1.674549 -1.223976 -1.978787  
 H 3.826845 -3.665958 -0.430426  
 H 2.984619 -3.375406 -1.971505  
 H 1.942791 -5.157091 0.311996  
 H 1.673640 -5.439126 -1.421611  
 H -0.079769 -3.665024 0.170239  
 H 0.256555 -3.377631 -1.546741  
 H 2.668145 -0.576921 -0.689808

5c.log

SCF (wB97x) = -1701.43829697  
 E(SCF)+ZPE(0 K)= -1700.634139  
 H(298 K)= -1700.590591  
 G(298 K)= -1700.710408  
 Lowest Frequency = 13.4972cm-1

Zn 6.028963 14.947147 4.348040  
 N 7.159550 16.439086 3.733111  
 N 7.199883 13.544532 3.561121  
 C 8.332938 16.295191 3.125047  
 C 8.889667 15.059714 2.763497  
 H 9.848350 15.102056 2.262275  
 C 8.342283 13.774792 2.935456  
 C 9.125908 17.537026 2.783902  
 H 8.568761 18.171298 2.087327  
 H 10.086363 17.282697 2.335232  
 H 9.300767 18.135099 3.683456  
 C 9.116473 12.606683 2.367873  
 H 9.404008 11.913880 3.165034  
 H 10.015748 12.939536 1.849110  
 H 8.491798 12.041045 1.670118  
 C 6.635416 17.744011 3.977556  
 C 6.815178 18.336385 5.238512  
 C 6.174748 19.548755 5.499949  
 H 6.286824 20.011796 6.476240  
 C 5.391347 20.167718 4.536696  
 H 4.895608 21.107468 4.758576  
 C 5.243360 19.581631 3.285010  
 H 4.629092 20.074017 2.537902  
 C 5.856065 18.366203 2.982323  
 C 7.654064 17.665090 6.314172  
 H 8.193109 16.836660 5.845291  
 C 6.759368 17.069925 7.410210  
 H 6.184595 17.855494 7.913183  
 H 7.361379 16.552514 8.164601  
 H 6.045621 16.355281 6.990351  
 C 8.701850 18.613049 6.909902  
 H 9.331648 19.051588 6.129616  
 H 9.349117 18.071923 7.607304  
 H 8.236964 19.434860 7.464469  
 C 5.631788 17.692339 1.636150  
 H 6.484649 17.034539 1.442496

|   |          |           |           |    |          |           |           |
|---|----------|-----------|-----------|----|----------|-----------|-----------|
| C | 6.689307 | 12.218097 | 3.675917  | Zn | 5.743374 | 14.605449 | 4.367890  |
| C | 5.735639 | 11.769310 | 2.745737  | N  | 6.671634 | 16.269333 | 3.858432  |
| C | 5.178995 | 10.501817 | 2.924274  | N  | 7.100023 | 13.421809 | 3.519981  |
| H | 4.437711 | 10.140525 | 2.216588  | C  | 7.857260 | 16.319607 | 3.259469  |
| C | 5.548268 | 9.700826  | 3.995549  | C  | 8.576736 | 15.193184 | 2.834970  |
| H | 5.103200 | 8.718718  | 4.121041  | H  | 9.524001 | 15.392545 | 2.350160  |
| C | 6.484139 | 10.163800 | 4.912588  | C  | 8.204938 | 13.838820 | 2.924487  |
| H | 6.758318 | 9.536764  | 5.755603  | C  | 8.477277 | 17.674630 | 3.001541  |
| C | 7.068082 | 11.422261 | 4.773519  | H  | 7.842210 | 18.269191 | 2.337357  |
| C | 5.278399 | 12.644364 | 1.588380  | H  | 9.464875 | 17.579035 | 2.549887  |
| H | 5.887936 | 13.552950 | 1.593410  | H  | 8.566746 | 18.235340 | 3.937031  |
| C | 5.487046 | 11.961940 | 0.230924  | C  | 9.131799 | 12.820144 | 2.300525  |
| H | 6.531724 | 11.667902 | 0.089990  | H  | 9.508349 | 12.128173 | 3.060466  |
| H | 5.211299 | 12.639991 | -0.583160 | H  | 9.979232 | 13.300455 | 1.810872  |
| H | 4.871315 | 11.061425 | 0.134405  | H  | 8.591497 | 12.216050 | 1.565598  |
| C | 3.815582 | 13.070436 | 1.775934  | C  | 5.971879 | 17.474088 | 4.168114  |
| H | 3.148045 | 12.202070 | 1.760437  | C  | 6.059644 | 18.011142 | 5.463219  |
| H | 3.504583 | 13.750576 | 0.976115  | C  | 5.241936 | 19.094026 | 5.789938  |
| H | 3.674585 | 13.580591 | 2.733517  | H  | 5.281754 | 19.509292 | 6.792938  |
| C | 8.039941 | 11.948143 | 5.818962  | C  | 4.369547 | 19.639504 | 4.858998  |
| H | 8.607428 | 12.766930 | 5.367213  | H  | 3.733959 | 20.475942 | 5.132200  |
| C | 7.267368 | 12.535017 | 7.009810  | C  | 4.312703 | 19.113356 | 3.573695  |
| H | 6.574876 | 13.317991 | 6.685591  | H  | 3.627209 | 19.547132 | 2.852656  |
| H | 7.954153 | 12.965977 | 7.746042  | C  | 5.107796 | 18.029418 | 3.203861  |
| H | 6.676585 | 11.757423 | 7.506084  | C  | 6.978754 | 17.401137 | 6.508893  |
| C | 9.051886 | 10.896125 | 6.284712  | H  | 7.635009 | 16.690041 | 5.998436  |
| H | 8.573746 | 10.092540 | 6.854448  | C  | 6.167772 | 16.614863 | 7.548601  |
| H | 9.798693 | 11.356536 | 6.939020  | H  | 5.488309 | 17.278439 | 8.094850  |
| H | 9.573822 | 10.441276 | 5.436979  | H  | 6.830534 | 16.132927 | 8.275013  |
| C | 4.366195 | 14.594007 | 5.329279  | H  | 5.559449 | 15.841411 | 7.070729  |
| H | 4.110993 | 13.542487 | 5.132440  | C  | 7.873046 | 18.449303 | 7.181431  |
| H | 4.570281 | 14.645101 | 6.409806  | H  | 8.442143 | 19.020823 | 6.441634  |
| C | 1.919085 | 17.551978 | 5.316369  | H  | 8.583327 | 17.963509 | 7.857914  |
| H | 1.720257 | 17.944621 | 4.312948  | H  | 7.288900 | 19.160351 | 7.775005  |
| H | 1.788259 | 18.386854 | 6.010742  | C  | 4.990025 | 17.412495 | 1.817655  |
| C | 0.964105 | 16.363967 | 5.628305  | H  | 5.928499 | 16.893958 | 1.598804  |
| H | 0.356995 | 16.546125 | 6.519865  | C  | 6.771469 | 12.034621 | 3.552097  |
| H | 0.265224 | 16.209536 | 4.799827  | C  | 5.889204 | 11.517645 | 2.587546  |
| C | 1.878503 | 15.134580 | 5.799572  | C  | 5.507844 | 10.178539 | 2.686289  |
| H | 1.416699 | 14.203504 | 5.455630  | H  | 4.824016 | 9.763450  | 1.950775  |
| H | 2.138382 | 14.995372 | 6.857638  | C  | 5.978411 | 9.372635  | 3.713229  |
| C | 4.379909 | 16.804706 | 1.684715  | H  | 5.669384 | 8.333965  | 3.776583  |
| H | 4.467056 | 16.031182 | 2.453774  | C  | 6.840164 | 9.902422  | 4.666103  |
| H | 4.218321 | 16.305271 | 0.723612  | H  | 7.193362 | 9.269541  | 5.474636  |
| H | 3.490852 | 17.400118 | 1.919720  | C  | 7.249546 | 11.233881 | 4.606522  |
| C | 5.549512 | 18.681570 | 0.469306  | C  | 5.321847 | 12.389564 | 1.477544  |
| H | 4.636685 | 19.285160 | 0.507435  | H  | 5.794827 | 13.373630 | 1.549073  |
| H | 5.536964 | 18.138408 | -0.480573 | C  | 5.640108 | 11.829894 | 0.085572  |
| H | 6.405068 | 19.363823 | 0.462197  | H  | 6.717729 | 11.699366 | -0.053627 |
| C | 3.160521 | 15.484165 | 5.026406  | H  | 5.276255 | 12.509876 | -0.691461 |
| H | 2.918889 | 15.423231 | 3.952928  | H  | 5.162948 | 10.857353 | -0.075257 |
| C | 3.338746 | 16.966423 | 5.374889  | C  | 3.811235 | 12.590071 | 1.662747  |
| H | 4.036843 | 17.485346 | 4.714123  | H  | 3.274894 | 11.638411 | 1.581776  |
| H | 3.743176 | 17.041428 | 6.393679  | H  | 3.414227 | 13.267692 | 0.899716  |
|   |          |           |           | H  | 3.588847 | 13.014293 | 2.646410  |
|   |          |           |           | C  | 8.136196 | 11.824222 | 5.692421  |
|   |          |           |           | H  | 8.589879 | 12.736787 | 5.295057  |
|   |          |           |           | C  | 7.285131 | 12.232192 | 6.904333  |
|   |          |           |           | H  | 6.494649 | 12.931888 | 6.615738  |
|   |          |           |           | H  | 7.903399 | 12.708955 | 7.672381  |
|   |          |           |           | H  | 6.802420 | 11.354910 | 7.348553  |
|   |          |           |           | C  | 9.278517 | 10.893004 | 6.111318  |
|   |          |           |           | H  | 8.910456 | 10.001342 | 6.629415  |

5d.log

SCF (wB97x) = -1740.75551970  
E(SCF)+ZPE(0 K)= -1739.921186  
H(298 K)= -1739.877084  
G(298 K)= -1739.996845  
Lowest Frequency = 16.9919cm<sup>-1</sup>

|   |           |           |           |
|---|-----------|-----------|-----------|
| H | 9.953112  | 11.411660 | 6.799595  |
| H | 9.861243  | 10.561552 | 5.246143  |
| C | 4.136185  | 13.956693 | 5.292177  |
| H | 4.043819  | 12.892775 | 5.027636  |
| H | 4.321279  | 13.966886 | 6.377436  |
| C | 3.875645  | 16.356888 | 1.795278  |
| H | 4.063850  | 15.560456 | 2.521799  |
| H | 3.794531  | 15.895391 | 0.805483  |
| H | 2.909584  | 16.807259 | 2.048112  |
| C | 4.777073  | 18.449538 | 0.710285  |
| H | 3.788770  | 18.916963 | 0.771295  |
| H | 4.846052  | 17.968711 | -0.270303 |
| H | 5.528968  | 19.243272 | 0.756057  |
| C | 0.288692  | 14.659348 | 5.427606  |
| C | 1.621606  | 13.951812 | 5.692372  |
| C | 2.804489  | 14.670350 | 5.024517  |
| C | 2.834547  | 16.137137 | 5.468809  |
| C | 1.511098  | 16.856630 | 5.206676  |
| C | 0.338080  | 16.126202 | 5.865217  |
| H | 1.804637  | 13.910552 | 6.776605  |
| H | 1.576078  | 12.912970 | 5.343448  |
| H | 0.066668  | 14.614005 | 4.351985  |
| H | -0.527984 | 14.136597 | 5.938480  |
| H | 3.062224  | 16.173238 | 6.545067  |
| H | 3.646419  | 16.666880 | 4.964119  |
| H | 1.571598  | 17.892165 | 5.559985  |
| H | 1.341599  | 16.906244 | 4.121195  |
| H | 0.456717  | 16.170525 | 6.956930  |
| H | -0.608028 | 16.626963 | 5.629939  |
| H | 2.604649  | 14.664064 | 3.940474  |

6a.log

SCF (wB97x) = -1396.50917707  
E(SCF)+ZPE(0 K)= -1395.766269  
H(298 K)= -1395.724170  
G(298 K)= -1395.841164  
Lowest Frequency = 14.0665cm<sup>-1</sup>

|   |           |           |           |
|---|-----------|-----------|-----------|
| N | -2.678086 | 18.613037 | 3.734096  |
| N | -1.960732 | 18.378729 | 6.545712  |
| C | -1.933159 | 18.685891 | 7.940238  |
| C | -1.878008 | 17.562280 | 3.629368  |
| C | -0.421738 | 16.543731 | 7.043919  |
| H | 0.302415  | 17.183925 | 7.557693  |
| H | 0.113967  | 15.741904 | 6.535617  |
| H | -1.060122 | 16.107682 | 7.818891  |
| C | -2.902894 | 18.121633 | 8.790257  |
| C | -1.656575 | 16.946871 | 2.266484  |
| H | -2.609789 | 16.620317 | 1.838435  |
| H | -0.980490 | 16.093084 | 2.315701  |
| H | -1.240958 | 17.689317 | 1.577681  |
| C | -1.212640 | 16.977521 | 4.722847  |
| H | -0.588618 | 16.123313 | 4.491955  |
| C | -2.927440 | 18.518739 | 10.127232 |
| H | -3.673306 | 18.100269 | 10.796554 |
| C | -4.618893 | 18.741492 | 2.252714  |
| C | -1.250202 | 17.358790 | 6.076054  |
| C | -3.320019 | 19.167080 | 2.587012  |
| C | -4.706260 | 20.475142 | 0.561411  |
| H | -5.251610 | 20.993166 | -0.221117 |
| C | -5.296451 | 19.413951 | 1.235490  |
| H | -6.305381 | 19.110495 | 0.972168  |

|    |           |           |           |
|----|-----------|-----------|-----------|
| C  | -1.005265 | 19.628378 | 8.421083  |
| C  | -2.700257 | 20.226303 | 1.898358  |
| C  | -1.302071 | 20.690995 | 2.279289  |
| H  | -0.832112 | 19.889128 | 2.856532  |
| C  | -3.935542 | 17.143050 | 8.251709  |
| H  | -3.565416 | 16.763096 | 7.294792  |
| C  | -4.390025 | 21.267465 | 5.705585  |
| H  | -5.194977 | 21.019313 | 6.416035  |
| H  | -3.837346 | 22.086321 | 6.193396  |
| C  | 0.007926  | 20.272135 | 7.486792  |
| H  | 0.056295  | 19.662774 | 6.579364  |
| C  | -1.066958 | 19.996514 | 9.765353  |
| H  | -0.364475 | 20.728694 | 10.152690 |
| C  | -3.415447 | 20.869919 | 0.888439  |
| H  | -2.960764 | 21.699196 | 0.354676  |
| C  | -5.288318 | 17.608228 | 3.016385  |
| H  | -4.504438 | 17.054285 | 3.541516  |
| C  | -6.249945 | 18.158396 | 4.080089  |
| H  | -5.745115 | 18.837189 | 4.776703  |
| H  | -6.693655 | 17.344043 | 4.662316  |
| H  | -7.061456 | 18.726397 | 3.612512  |
| C  | -4.150373 | 15.933789 | 9.168215  |
| H  | -3.203688 | 15.433833 | 9.394813  |
| H  | -4.813159 | 15.208397 | 8.686192  |
| H  | -4.615437 | 16.217937 | 10.117833 |
| C  | -5.262822 | 17.866127 | 7.977108  |
| H  | -5.691089 | 18.253383 | 8.907892  |
| H  | -5.991438 | 17.187803 | 7.520996  |
| H  | -5.127967 | 18.722128 | 7.306435  |
| C  | -2.018448 | 19.448457 | 10.615569 |
| H  | -2.054272 | 19.748870 | 11.658024 |
| C  | -0.411329 | 20.953534 | 1.059827  |
| H  | -0.390174 | 20.088519 | 0.389996  |
| H  | 0.613930  | 21.163762 | 1.380011  |
| H  | -0.754496 | 21.817481 | 0.481354  |
| C  | 1.420820  | 20.318708 | 8.078697  |
| H  | 1.479231  | 20.987108 | 8.943933  |
| H  | 2.130635  | 20.689398 | 7.332618  |
| H  | 1.749914  | 19.325617 | 8.399646  |
| C  | -5.940741 | 22.992152 | 4.535128  |
| H  | -6.370699 | 23.342514 | 3.594501  |
| C  | -5.022134 | 21.801320 | 4.412742  |
| H  | -4.242687 | 22.067388 | 3.683298  |
| H  | -5.587641 | 21.007235 | 3.902805  |
| C  | -1.364412 | 21.929544 | 3.185242  |
| H  | -1.828667 | 22.771219 | 2.660042  |
| H  | -0.360330 | 22.233571 | 3.498996  |
| H  | -1.960277 | 21.748169 | 4.086925  |
| C  | -6.261318 | 23.631753 | 5.656937  |
| H  | -5.861343 | 23.323992 | 6.618953  |
| H  | -6.934140 | 24.484084 | 5.650067  |
| C  | -0.462047 | 21.675430 | 7.074850  |
| H  | -1.464522 | 21.653912 | 6.632973  |
| H  | 0.222760  | 22.119003 | 6.344544  |
| H  | -0.509828 | 22.338054 | 7.945713  |
| C  | -6.005946 | 16.615258 | 2.095271  |
| H  | -6.876001 | 17.066366 | 1.607169  |
| H  | -6.365625 | 15.757681 | 2.672401  |
| H  | -5.336949 | 16.244824 | 1.312563  |
| Mg | -3.131240 | 19.603595 | 5.437358  |

6b.log

SCF (wB97x) = -1435.81449796  
E(SCF)+ZPE(0 K)= -1435.043320  
H(298 K)= -1434.999690  
G(298 K)= -1435.121099  
Lowest Frequency = 10.0854cm-1

|    |           |           |           |
|----|-----------|-----------|-----------|
| Mg | -2.993080 | 19.262786 | 5.495223  |
| N  | -2.753317 | 18.298503 | 3.730449  |
| N  | -1.888957 | 17.886059 | 6.483400  |
| C  | -1.729519 | 18.149491 | 7.877477  |
| C  | -2.090862 | 17.165483 | 3.548280  |
| C  | -0.498487 | 15.900901 | 6.817772  |
| H  | 0.309639  | 16.460801 | 7.298904  |
| H  | -0.067704 | 15.078028 | 6.247134  |
| H  | -1.115969 | 15.488260 | 7.621955  |
| C  | -2.652908 | 17.610919 | 8.794510  |
| C  | -2.033416 | 16.569650 | 2.159969  |
| H  | -3.045221 | 16.375581 | 1.789877  |
| H  | -1.466716 | 15.638458 | 2.145309  |
| H  | -1.573615 | 17.275723 | 1.461140  |
| C  | -1.423003 | 16.475455 | 4.577619  |
| H  | -0.914334 | 15.566757 | 4.281119  |
| C  | -2.539377 | 17.966981 | 10.137941 |
| H  | -3.244700 | 17.566833 | 10.859991 |
| C  | -4.732571 | 18.728865 | 2.355978  |
| C  | -1.318257 | 16.817718 | 5.937347  |
| C  | -3.374220 | 18.967121 | 2.632847  |
| C  | -4.668935 | 20.512408 | 0.716184  |
| H  | -5.177617 | 21.124072 | -0.022232 |
| C  | -5.361981 | 19.517427 | 1.392290  |
| H  | -6.415441 | 19.362677 | 1.179423  |
| C  | -0.718239 | 19.031694 | 8.298863  |
| C  | -2.652790 | 19.958172 | 1.940728  |
| C  | -1.188699 | 20.221475 | 2.262191  |
| H  | -0.794073 | 19.334321 | 2.766392  |
| C  | -3.782974 | 16.710399 | 8.318212  |
| H  | -3.492227 | 16.296147 | 7.348293  |
| C  | -4.157705 | 20.962137 | 5.924399  |
| H  | -5.052286 | 20.603755 | 6.460027  |
| H  | -3.681209 | 21.660804 | 6.628525  |
| C  | 0.243268  | 19.656641 | 7.299578  |
| H  | 0.135406  | 19.116353 | 6.353990  |
| C  | -0.643147 | 19.361522 | 9.652842  |
| H  | 0.127147  | 20.047290 | 9.994231  |
| C  | -3.323030 | 20.723543 | 0.987108  |
| H  | -2.788494 | 21.503241 | 0.452828  |
| C  | -5.520091 | 17.685170 | 3.132988  |
| H  | -4.799884 | 17.025452 | 3.626896  |
| C  | -6.362792 | 18.353880 | 4.229255  |
| H  | -5.742208 | 18.933906 | 4.920265  |
| H  | -6.910446 | 17.604235 | 4.810428  |
| H  | -7.084939 | 19.055111 | 3.798486  |
| C  | -4.049768 | 15.528313 | 9.255827  |
| H  | -3.134060 | 14.962874 | 9.454127  |
| H  | -4.780440 | 14.849072 | 8.805952  |
| H  | -4.459185 | 15.853128 | 10.217987 |
| C  | -5.061923 | 17.532842 | 8.098467  |
| H  | -5.409319 | 17.964568 | 9.043257  |
| H  | -5.863560 | 16.908240 | 7.690728  |
| H  | -4.895612 | 18.365883 | 7.406682  |
| C  | -1.542890 | 18.834413 | 10.568902 |
| H  | -1.472175 | 19.102956 | 11.618253 |
| C  | -0.333851 | 20.447751 | 1.010335  |

|   |           |           |          |
|---|-----------|-----------|----------|
| H | -0.460719 | 19.633287 | 0.290765 |
| H | 0.724934  | 20.502738 | 1.282061 |
| H | -0.588071 | 21.385055 | 0.504747 |
| C | 1.708727  | 19.530554 | 7.730875 |
| H | 1.916368  | 20.106776 | 8.638503 |
| H | 2.369376  | 19.909032 | 6.944513 |
| H | 1.975360  | 18.487807 | 7.928377 |
| C | -5.755468 | 22.730315 | 4.861557 |
| H | -5.859283 | 23.357357 | 3.966795 |
| C | -4.592019 | 21.735525 | 4.665733 |
| H | -3.733375 | 22.295267 | 4.272634 |
| H | -4.887579 | 21.052955 | 3.858221 |
| C | -1.047044 | 21.399786 | 3.236419 |
| H | -1.431824 | 22.321699 | 2.787378 |
| H | 0.002215  | 21.560224 | 3.505832 |
| H | -1.611880 | 21.236868 | 4.161341 |
| C | -7.062122 | 22.040961 | 5.127887 |
| H | -7.134228 | 21.485764 | 6.062968 |
| C | -0.131818 | 21.123859 | 7.041056 |
| H | -1.173858 | 21.223623 | 6.715840 |
| H | 0.510623  | 21.561193 | 6.269615 |
| H | -0.021431 | 21.718560 | 7.954325 |
| C | -6.393661 | 16.808688 | 2.228427 |
| H | -7.208272 | 17.379915 | 1.771484 |
| H | -6.849446 | 16.002145 | 2.811252 |
| H | -5.806073 | 16.358576 | 1.422286 |
| C | -8.104227 | 22.034570 | 4.299043 |
| H | -9.018811 | 21.498010 | 4.534239 |
| H | -8.079520 | 22.574025 | 3.354622 |
| H | -5.513212 | 23.396206 | 5.701483 |

6c.log

SCF (wB97x) = -1475.12131661  
E(SCF)+ZPE(0 K)= -1474.320631  
H(298 K)= -1474.276113  
G(298 K)= -1474.398412  
Lowest Frequency = 12.5080cm-1

|    |           |           |           |
|----|-----------|-----------|-----------|
| Mg | -3.013778 | 19.347600 | 5.402265  |
| N  | -2.784549 | 18.412260 | 3.621652  |
| N  | -1.886102 | 17.963303 | 6.355907  |
| C  | -1.711969 | 18.203740 | 7.752447  |
| C  | -2.115581 | 17.288310 | 3.411826  |
| C  | -0.484989 | 15.978513 | 6.644030  |
| H  | 0.329764  | 16.531553 | 7.122004  |
| H  | -0.061993 | 15.163021 | 6.057200  |
| H  | -1.092454 | 15.555925 | 7.450657  |
| C  | -2.633661 | 17.661519 | 8.668608  |
| C  | -2.071922 | 16.715573 | 2.013341  |
| H  | -3.086877 | 16.516289 | 1.654735  |
| H  | -1.495525 | 15.791004 | 1.975333  |
| H  | -1.630020 | 17.437875 | 1.319550  |
| C  | -1.430618 | 16.586913 | 4.422033  |
| H  | -0.918962 | 15.686696 | 4.105433  |
| C  | -2.505972 | 17.995983 | 10.016501 |
| H  | -3.210779 | 17.593087 | 10.737665 |
| C  | -4.796472 | 18.836385 | 2.296768  |
| C  | -1.315807 | 16.906898 | 5.786355  |
| C  | -3.435746 | 19.090130 | 2.548120  |
| C  | -4.791786 | 20.645311 | 0.684088  |
| H  | -5.325201 | 21.260737 | -0.033726 |
| C  | -5.456383 | 19.629293 | 1.358030  |

|   |           |           |           |
|---|-----------|-----------|-----------|
| H | -6.512067 | 19.464489 | 1.165998  |
| C | -0.686445 | 19.067047 | 8.179355  |
| C | -2.741954 | 20.100235 | 1.855660  |
| C | -1.271851 | 20.370671 | 2.142832  |
| H | -0.857417 | 19.477427 | 2.619735  |
| C | -3.776815 | 16.779411 | 8.189534  |
| H | -3.508573 | 16.395213 | 7.200975  |
| C | -4.148714 | 21.058419 | 5.863550  |
| H | -5.013047 | 20.734562 | 6.467386  |
| H | -3.608799 | 21.763069 | 6.515739  |
| C | 0.273601  | 19.695636 | 7.180962  |
| H | 0.164951  | 19.158648 | 6.233734  |
| C | -0.597019 | 19.375071 | 9.537420  |
| H | 0.184066  | 20.046100 | 9.883356  |
| C | -3.443521 | 20.871729 | 0.929606  |
| H | -2.931293 | 21.666431 | 0.395562  |
| C | -5.547776 | 17.763520 | 3.070744  |
| H | -4.805069 | 17.093071 | 3.514295  |
| C | -6.353648 | 18.388212 | 4.219452  |
| H | -5.714104 | 18.954581 | 4.905321  |
| H | -6.869700 | 17.614017 | 4.797356  |
| H | -7.097118 | 19.094014 | 3.835219  |
| C | -4.024631 | 15.568920 | 9.095745  |
| H | -3.106771 | 14.993545 | 9.250825  |
| H | -4.770665 | 14.907436 | 8.644512  |
| H | -4.405703 | 15.864602 | 10.078722 |
| C | -5.057692 | 17.611559 | 8.024832  |
| H | -5.384720 | 18.010782 | 8.990998  |
| H | -5.869317 | 17.003360 | 7.612055  |
| H | -4.902519 | 18.467981 | 7.359432  |
| C | -1.496265 | 18.844982 | 10.452605 |
| H | -1.414261 | 19.096918 | 11.505263 |
| C | -0.453923 | 20.625453 | 0.871844  |
| H | -0.596096 | 19.823665 | 0.140963  |
| H | 0.611741  | 20.682509 | 1.114749  |
| H | -0.728072 | 21.570282 | 0.391228  |
| C | 1.740061  | 19.571104 | 7.609012  |
| H | 1.950310  | 20.149255 | 8.514803  |
| H | 2.398236  | 19.948719 | 6.820188  |
| H | 2.008037  | 18.528880 | 7.807591  |
| C | -5.644094 | 22.956410 | 4.909951  |
| H | -5.740950 | 23.608212 | 4.031126  |
| C | -4.651476 | 21.816470 | 4.620942  |
| H | -3.794184 | 22.244551 | 4.085586  |
| H | -5.114788 | 21.123046 | 3.907909  |
| C | -1.108854 | 21.531652 | 3.134206  |
| H | -1.514483 | 22.458855 | 2.715347  |
| H | -0.052641 | 21.695560 | 3.372565  |
| H | -1.641335 | 21.345866 | 4.073732  |
| C | -7.037242 | 22.486126 | 5.334563  |
| H | -6.943208 | 21.737963 | 6.133833  |
| C | -0.104183 | 21.162955 | 6.927229  |
| H | -1.147091 | 21.262203 | 6.605000  |
| H | 0.535508  | 21.603524 | 6.155336  |
| H | 0.007336  | 21.754971 | 7.842118  |
| C | -6.451511 | 16.910128 | 2.173882  |
| H | -7.290571 | 17.488400 | 1.773506  |
| H | -6.874343 | 16.079126 | 2.747099  |
| H | -5.895511 | 16.494602 | 1.327775  |
| C | -7.916021 | 21.914061 | 4.252885  |
| H | -8.875299 | 21.530807 | 4.603456  |
| H | -5.229457 | 23.581083 | 5.711104  |
| C | -7.655765 | 21.851264 | 2.948508  |

|   |           |           |          |
|---|-----------|-----------|----------|
| H | -7.585332 | 23.320987 | 5.793678 |
| H | -8.379319 | 21.433972 | 2.254055 |
| H | -6.718710 | 22.198347 | 2.523805 |

6d.log

SCF (wB97x) = -1514.42781912  
 E(SCF)+ZPE(0 K)= -1513.597989  
 H(298 K)= -1513.552251  
 G(298 K)= -1513.677167  
 Lowest Frequency = 14.2344cm-1

|    |           |           |           |
|----|-----------|-----------|-----------|
| Mg | -3.128438 | 19.289700 | 5.234071  |
| N  | -2.825929 | 18.333310 | 3.476743  |
| N  | -1.998792 | 17.944298 | 6.240704  |
| C  | -1.875509 | 18.208236 | 7.638525  |
| C  | -2.126907 | 17.220862 | 3.303446  |
| C  | -0.564389 | 15.995839 | 6.601643  |
| H  | 0.226395  | 16.572056 | 7.092391  |
| H  | -0.110070 | 15.178467 | 6.041440  |
| H  | -1.186928 | 15.576220 | 7.398258  |
| C  | -2.823134 | 17.669891 | 8.529994  |
| C  | -2.039982 | 16.622158 | 1.917895  |
| H  | -3.041575 | 16.378826 | 1.548872  |
| H  | -1.431082 | 15.717938 | 1.908273  |
| H  | -1.613568 | 17.344910 | 1.215068  |
| C  | -1.452585 | 16.552582 | 4.342213  |
| H  | -0.911451 | 15.660018 | 4.054289  |
| C  | -2.748811 | 18.029268 | 9.875545  |
| H  | -3.474558 | 17.630017 | 10.577710 |
| C  | -4.823948 | 18.663866 | 2.105811  |
| C  | -1.387386 | 16.893757 | 5.705031  |
| C  | -3.477868 | 18.967771 | 2.377806  |
| C  | -4.843730 | 20.427457 | 0.443444  |
| H  | -5.381227 | 21.006009 | -0.301022 |
| C  | -5.487554 | 19.405368 | 1.127935  |
| H  | -6.528473 | 19.187999 | 0.905619  |
| C  | -0.874661 | 19.089422 | 8.087213  |
| C  | -2.801977 | 19.980139 | 1.670467  |
| C  | -1.343131 | 20.294991 | 1.971065  |
| H  | -0.909036 | 19.416306 | 2.457565  |
| C  | -3.935531 | 16.762357 | 8.026347  |
| H  | -3.626059 | 16.364751 | 7.055216  |
| C  | -4.278258 | 20.997846 | 5.661413  |
| H  | -5.152913 | 20.693551 | 6.259935  |
| H  | -3.728656 | 21.690408 | 6.320156  |
| C  | 0.115809  | 19.709435 | 7.113364  |
| H  | 0.056252  | 19.147060 | 6.176643  |
| C  | -0.838714 | 19.421902 | 9.441893  |
| H  | -0.078064 | 20.107310 | 9.804581  |
| C  | -3.509327 | 20.704995 | 0.711763  |
| H  | -3.012262 | 21.501903 | 0.167077  |
| C  | -5.558672 | 17.587999 | 2.891001  |
| H  | -4.808671 | 16.992017 | 3.419502  |
| C  | -6.472791 | 18.220377 | 3.950844  |
| H  | -5.918019 | 18.895610 | 4.612275  |
| H  | -6.946556 | 17.450072 | 4.568362  |
| H  | -7.265919 | 18.810734 | 3.478475  |
| C  | -4.197054 | 15.564068 | 8.944965  |
| H  | -3.276598 | 15.006297 | 9.142824  |
| H  | -4.916296 | 14.882958 | 8.479646  |
| H  | -4.617534 | 15.870841 | 9.908251  |
| C  | -5.222746 | 17.570408 | 7.801631  |

|                               |           |           |           |   |           |           |           |
|-------------------------------|-----------|-----------|-----------|---|-----------|-----------|-----------|
| H                             | -5.589339 | 17.982388 | 8.747998  | H | -1.251202 | 17.659240 | 1.590616  |
| H                             | -6.010165 | 16.941048 | 7.373780  | C | -1.250252 | 16.977177 | 4.740325  |
| H                             | -5.058860 | 18.417229 | 7.125988  | H | -0.625390 | 16.119950 | 4.524090  |
| C                             | -1.765698 | 18.897964 | 10.332762 | C | -2.962928 | 18.616418 | 10.113352 |
| H                             | -1.725402 | 19.169486 | 11.382960 | H | -3.690008 | 18.193355 | 10.800355 |
| C                             | -0.519851 | 20.564700 | 0.706590  | C | -4.619149 | 18.773555 | 2.225849  |
| H                             | -0.636098 | 19.757557 | -0.022986 | C | -1.292559 | 17.383024 | 6.084463  |
| H                             | 0.541727  | 20.647622 | 0.959494  | C | -3.317949 | 19.174567 | 2.576407  |
| H                             | -0.811311 | 21.501566 | 0.220627  | C | -4.652977 | 20.516267 | 0.541731  |
| C                             | 1.565112  | 19.622486 | 7.604508  | H | -5.179214 | 21.049361 | -0.243843 |
| H                             | 1.728873  | 20.230106 | 8.500544  | C | -5.271536 | 19.463877 | 1.203713  |
| H                             | 2.248901  | 19.988732 | 6.832312  | H | -6.283543 | 19.181200 | 0.928528  |
| H                             | 1.841604  | 18.591223 | 7.844409  | C | -1.089716 | 19.736500 | 8.360487  |
| C                             | -5.560122 | 23.053102 | 4.711820  | C | -2.663913 | 20.217219 | 1.894565  |
| H                             | -5.842261 | 23.520398 | 3.759327  | C | -1.253145 | 20.639687 | 2.280246  |
| C                             | -4.762072 | 21.771141 | 4.421857  | H | -0.803052 | 19.818444 | 2.845673  |
| H                             | -3.906639 | 22.057447 | 3.796636  | C | -3.934003 | 17.144674 | 8.294833  |
| H                             | -5.361493 | 21.114559 | 3.775969  | H | -3.574883 | 16.766228 | 7.333474  |
| C                             | -1.219144 | 21.465811 | 2.956417  | C | -4.348567 | 21.075340 | 5.719018  |
| H                             | -1.650408 | 22.378333 | 2.531198  | H | -5.185278 | 20.737638 | 6.346861  |
| H                             | -0.168967 | 21.661762 | 3.197043  | H | -3.822093 | 21.823162 | 6.327588  |
| H                             | -1.747621 | 21.269463 | 3.895924  | C | -0.088734 | 20.378665 | 7.411981  |
| C                             | -6.818237 | 22.851826 | 5.561801  | H | -0.101302 | 19.809284 | 6.478083  |
| H                             | -6.534461 | 22.488831 | 6.556070  | C | -1.154520 | 20.141797 | 9.694111  |
| C                             | -0.275237 | 21.162743 | 6.805313  | H | -0.472042 | 20.907145 | 10.053067 |
| H                             | -1.305106 | 21.235282 | 6.437742  | C | -3.355762 | 20.879975 | 0.881037  |
| H                             | 0.388814  | 21.594481 | 6.049167  | H | -2.877061 | 21.698903 | 0.352389  |
| H                             | -0.212228 | 21.779945 | 7.708080  | C | -5.321008 | 17.646757 | 2.969179  |
| C                             | -6.346433 | 16.631316 | 1.988947  | H | -4.564094 | 17.108521 | 3.547176  |
| H                             | -7.179082 | 17.136336 | 1.488562  | C | -6.347034 | 18.201224 | 3.968058  |
| H                             | -6.769814 | 15.814751 | 2.582182  | H | -5.876855 | 18.870630 | 4.695207  |
| H                             | -5.705558 | 16.195957 | 1.216072  | H | -6.830145 | 17.387333 | 4.518779  |
| C                             | -7.832077 | 21.867411 | 4.953498  | H | -7.125738 | 18.771567 | 3.449891  |
| H                             | -7.362547 | 20.885538 | 4.830403  | C | -4.060651 | 15.943689 | 9.238846  |
| H                             | -4.904751 | 23.765139 | 5.231204  | H | -3.084353 | 15.494749 | 9.446546  |
| C                             | -8.376264 | 22.337671 | 3.634960  | H | -4.700652 | 15.177419 | 8.790311  |
| H                             | -7.307910 | 23.822462 | 5.715429  | H | -4.510722 | 16.223386 | 10.197031 |
| H                             | -9.023157 | 23.215506 | 3.673734  | C | -5.301959 | 17.796104 | 8.045281  |
| C                             | -8.096879 | 21.794625 | 2.452921  | H | -5.715456 | 18.197307 | 8.976979  |
| H                             | -8.661507 | 21.734340 | 5.659920  | H | -6.012735 | 17.067395 | 7.641532  |
| H                             | -7.432259 | 20.938355 | 2.368873  | H | -5.222069 | 18.625028 | 7.335485  |
| H                             | -8.504336 | 22.194357 | 1.528999  | C | -2.082594 | 19.590457 | 10.567067 |
| 7a.log                        |           |           |           | H | -2.121774 | 19.920739 | 11.600378 |
| SCF (wB97x) = -1622.79186344  |           |           |           | C | -0.359200 | 20.894309 | 1.061307  |
| E(SCF)+ZPE(0 K)= -1622.048620 |           |           |           | H | -0.368614 | 20.041550 | 0.375553  |
| H(298 K)= -1622.006357        |           |           |           | H | 0.673432  | 21.065305 | 1.381139  |
| G(298 K)= -1622.124307        |           |           |           | H | -0.675684 | 21.779559 | 0.499966  |
| Lowest Frequency = 6.9653cm-1 |           |           |           | C | 1.343884  | 20.332475 | 7.956796  |
|                               |           |           |           | H | 1.453792  | 20.941576 | 8.860126  |
|                               |           |           |           | H | 2.045683  | 20.720710 | 7.211843  |
|                               |           |           |           | H | 1.642661  | 19.309616 | 8.206237  |
| N                             | -2.701069 | 18.608350 | 3.729904  | C | -5.843520 | 22.898857 | 4.671410  |
| N                             | -2.014881 | 18.402775 | 6.532031  | H | -6.229677 | 23.353461 | 3.757611  |
| C                             | -1.991582 | 18.753141 | 7.915996  | C | -4.903596 | 21.740918 | 4.455025  |
| C                             | -1.906487 | 17.553268 | 3.639102  | H | -4.083791 | 22.094616 | 3.814979  |
| C                             | -0.457419 | 16.599680 | 7.071604  | H | -5.424058 | 21.003719 | 3.828302  |
| H                             | 0.251973  | 17.260659 | 7.578834  | C | -1.275663 | 21.864393 | 3.205765  |
| H                             | 0.095130  | 15.800078 | 6.577913  | H | -1.739520 | 22.721357 | 2.705149  |
| H                             | -1.092407 | 16.163643 | 7.849081  | H | -0.259173 | 22.148248 | 3.497949  |
| C                             | -2.934760 | 18.179869 | 8.788939  | H | -1.845718 | 21.667366 | 4.119404  |
| C                             | -1.682378 | 16.927957 | 2.281554  | C | -6.231575 | 23.398283 | 5.842011  |
| H                             | -2.636091 | 16.609409 | 1.848913  | H | -5.880118 | 22.987501 | 6.784247  |
| H                             | -1.017207 | 16.066410 | 2.343782  | H | -6.916378 | 24.238954 | 5.897298  |

|    |           |           |          |
|----|-----------|-----------|----------|
| C  | -0.505856 | 21.817733 | 7.077240 |
| H  | -1.514384 | 21.848382 | 6.653858 |
| H  | 0.183014  | 22.262996 | 6.351746 |
| H  | -0.504617 | 22.443550 | 7.976337 |
| C  | -5.972221 | 16.636184 | 2.017719 |
| H  | -6.808760 | 17.077242 | 1.465812 |
| H  | -6.366548 | 15.785457 | 2.582319 |
| H  | -5.251987 | 16.257128 | 1.286048 |
| Zn | -3.156309 | 19.550449 | 5.410071 |

7b.log

SCF (wB97x) = -1662.09710684  
E(SCF)+ZPE(0 K)= -1661.324700  
H(298 K)= -1661.281190  
G(298 K)= -1661.401838  
Lowest Frequency = 8.0362cm-1

|    |           |           |           |
|----|-----------|-----------|-----------|
| Zn | -3.084182 | 19.161186 | 5.476538  |
| N  | -2.806353 | 18.271120 | 3.728801  |
| N  | -1.956827 | 17.891122 | 6.472090  |
| C  | -1.782532 | 18.200519 | 7.854524  |
| C  | -2.130750 | 17.145925 | 3.553032  |
| C  | -0.507720 | 15.956078 | 6.830645  |
| H  | 0.280603  | 16.547960 | 7.305400  |
| H  | -0.049448 | 15.143314 | 6.266885  |
| H  | -1.110561 | 15.529722 | 7.638594  |
| C  | -2.658230 | 17.641925 | 8.804748  |
| C  | -2.055029 | 16.553836 | 2.164333  |
| H  | -3.061708 | 16.376991 | 1.773182  |
| H  | -1.502940 | 15.613724 | 2.161201  |
| H  | -1.567640 | 17.252071 | 1.476506  |
| C  | -1.462803 | 16.467454 | 4.587383  |
| H  | -0.940935 | 15.563439 | 4.300178  |
| C  | -2.524925 | 18.030222 | 10.137367 |
| H  | -3.195017 | 17.616456 | 10.884993 |
| C  | -4.748035 | 18.756596 | 2.321628  |
| C  | -1.358312 | 16.832826 | 5.939520  |
| C  | -3.391054 | 18.959564 | 2.624805  |
| C  | -4.606411 | 20.542778 | 0.689363  |
| H  | -5.084025 | 21.170279 | -0.056570 |
| C  | -5.338061 | 19.565372 | 1.348993  |
| H  | -6.391160 | 19.436969 | 1.115743  |
| C  | -0.799271 | 19.132939 | 8.229335  |
| C  | -2.626804 | 19.927939 | 1.945819  |
| C  | -1.159430 | 20.144642 | 2.288823  |
| H  | -0.787977 | 19.230971 | 2.762263  |
| C  | -3.761890 | 16.684562 | 8.380974  |
| H  | -3.497841 | 16.284648 | 7.397728  |
| C  | -4.178301 | 20.722003 | 5.931925  |
| H  | -5.101188 | 20.333060 | 6.384858  |
| H  | -3.701743 | 21.311841 | 6.726679  |
| C  | 0.117968  | 19.776835 | 7.200654  |
| H  | -0.053948 | 19.279697 | 6.241286  |
| C  | -0.701947 | 19.490679 | 9.574945  |
| H  | 0.048803  | 20.213813 | 9.881750  |
| C  | -3.258820 | 20.713250 | 0.982915  |
| H  | -2.692968 | 21.476589 | 0.457672  |
| C  | -5.579710 | 17.721186 | 3.061870  |
| H  | -4.894229 | 17.102567 | 3.649013  |
| C  | -6.545422 | 18.399163 | 4.044065  |
| H  | -6.004815 | 19.007481 | 4.774198  |
| H  | -7.132403 | 17.651110 | 4.587602  |

|   |           |           |           |
|---|-----------|-----------|-----------|
| H | -7.238356 | 19.066583 | 3.521165  |
| C | -3.920709 | 15.492161 | 9.330269  |
| H | -2.968731 | 14.974406 | 9.483769  |
| H | -4.636946 | 14.775314 | 8.916865  |
| H | -4.298028 | 15.797781 | 10.311675 |
| C | -5.088658 | 17.441713 | 8.221055  |
| H | -5.405479 | 17.870854 | 9.177858  |
| H | -5.879519 | 16.772034 | 7.867069  |
| H | -4.991261 | 18.264317 | 7.505793  |
| C | -1.554200 | 18.945789 | 10.525072 |
| H | -1.466601 | 19.237345 | 11.567026 |
| C | -0.288330 | 20.399082 | 1.053827  |
| H | -0.434431 | 19.623035 | 0.296293  |
| H | 0.769102  | 20.407739 | 1.335905  |
| H | -0.507216 | 21.366666 | 0.590348  |
| C | 1.599989  | 19.595556 | 7.550372  |
| H | 1.862644  | 20.115305 | 8.477794  |
| H | 2.231362  | 20.002629 | 6.754117  |
| H | 1.852035  | 18.538287 | 7.677967  |
| C | -5.616211 | 22.681024 | 5.033844  |
| H | -5.675294 | 23.385852 | 4.195470  |
| C | -4.523792 | 21.632987 | 4.743706  |
| H | -3.620201 | 22.161113 | 4.416014  |
| H | -4.852777 | 21.043667 | 3.879917  |
| C | -0.997830 | 21.277690 | 3.311537  |
| H | -1.374678 | 22.222703 | 2.905554  |
| H | 0.055721  | 21.413511 | 3.578209  |
| H | -1.553816 | 21.069512 | 4.231185  |
| C | -6.968165 | 22.062605 | 5.249100  |
| H | -7.090432 | 21.462307 | 6.150433  |
| C | -0.230763 | 21.261013 | 7.019509  |
| H | -1.280170 | 21.387283 | 6.734966  |
| H | 0.391608  | 21.713196 | 6.240320  |
| H | -0.068754 | 21.817624 | 7.948992  |
| C | -6.330726 | 16.789442 | 2.102903  |
| H | -7.093822 | 17.327238 | 1.530639  |
| H | -6.838614 | 15.998180 | 2.663394  |
| H | -5.648429 | 16.318328 | 1.388394  |
| C | -7.995606 | 22.170622 | 4.409936  |
| H | -8.945584 | 21.681325 | 4.603295  |
| H | -7.921726 | 22.758632 | 3.497692  |
| H | -5.329714 | 23.258715 | 5.923714  |

7c.log

SCF (wB97x) = -1701.40423927  
E(SCF)+ZPE(0 K)= -1700.602321  
H(298 K)= -1700.557896  
G(298 K)= -1700.679511  
Lowest Frequency = 11.9280cm-1

|    |           |           |          |
|----|-----------|-----------|----------|
| Zn | -3.075082 | 19.270908 | 5.387900 |
| N  | -2.824300 | 18.399840 | 3.626449 |
| N  | -1.940761 | 17.979677 | 6.350161 |
| C  | -1.763381 | 18.259616 | 7.738413 |
| C  | -2.147166 | 17.280778 | 3.422614 |
| C  | -0.492381 | 16.036896 | 6.664266 |
| H  | 0.303839  | 16.617486 | 7.139931 |
| H  | -0.043868 | 15.229865 | 6.084621 |
| H  | -1.090121 | 15.602495 | 7.471684 |
| C  | -2.650736 | 17.698569 | 8.675930 |
| C  | -2.098474 | 16.705763 | 2.025602 |
| H  | -3.112328 | 16.509248 | 1.662909 |



|   |           |           |           |
|---|-----------|-----------|-----------|
| H | -1.525673 | 15.778606 | 1.995438  |
| H | -1.648701 | 17.422604 | 1.331430  |
| C | -1.459055 | 16.591018 | 4.436147  |
| H | -0.936663 | 15.694250 | 4.127906  |
| C | -2.518687 | 18.065238 | 10.014962 |
| H | -3.198644 | 17.649923 | 10.752894 |
| C | -4.819118 | 18.855662 | 2.289636  |
| C | -1.346441 | 16.931051 | 5.794105  |
| C | -3.457540 | 19.087607 | 2.549745  |
| C | -4.773758 | 20.666716 | 0.680065  |
| H | -5.292052 | 21.293686 | -0.038891 |
| C | -5.459962 | 19.662517 | 1.349025  |
| H | -6.518002 | 19.516239 | 1.152914  |
| C | -0.765319 | 19.168318 | 8.132590  |
| C | -2.738268 | 20.080820 | 1.858536  |
| C | -1.262713 | 20.318801 | 2.148601  |
| H | -0.860076 | 19.405402 | 2.596558  |
| C | -3.762302 | 16.758281 | 8.234822  |
| H | -3.507865 | 16.384949 | 7.238693  |
| C | -4.142009 | 20.841163 | 5.875933  |
| H | -5.030414 | 20.474094 | 6.410163  |
| H | -3.602864 | 21.450971 | 6.614366  |
| C | 0.168894  | 19.807936 | 7.116684  |
| H | 0.008701  | 19.309302 | 6.156182  |
| C | -0.670074 | 19.505150 | 9.483526  |
| H | 0.090555  | 20.211296 | 9.805083  |
| C | -3.421220 | 20.865103 | 0.929728  |
| H | -2.891197 | 21.648087 | 0.395983  |
| C | -5.597117 | 17.787682 | 3.042758  |
| H | -4.873646 | 17.159371 | 3.570919  |
| C | -6.515007 | 18.421210 | 4.097912  |
| H | -5.941996 | 19.012245 | 4.818565  |
| H | -7.062440 | 17.648032 | 4.647583  |
| H | -7.239289 | 19.097315 | 3.632322  |
| C | -3.915207 | 15.540629 | 9.152776  |
| H | -2.964045 | 15.014145 | 9.279162  |
| H | -4.640708 | 14.838939 | 8.729543  |
| H | -4.277249 | 15.821293 | 10.147328 |
| C | -5.088484 | 17.522364 | 8.107828  |
| H | -5.395823 | 17.926422 | 9.078571  |
| H | -5.884058 | 16.864047 | 7.743208  |
| H | -4.995779 | 18.363298 | 7.413733  |
| C | -1.537042 | 18.960819 | 10.420924 |
| H | -1.451184 | 19.236470 | 11.467354 |
| C | -0.444783 | 20.599794 | 0.883279  |
| H | -0.608454 | 19.829375 | 0.123591  |
| H | 0.622687  | 20.622717 | 1.123700  |
| H | -0.697103 | 21.568441 | 0.439367  |
| C | 1.645519  | 19.624607 | 7.487206  |
| H | 1.898851  | 20.151530 | 8.413149  |
| H | 2.288160  | 20.023077 | 6.695662  |
| H | 1.892582  | 18.567679 | 7.626965  |
| C | -5.547626 | 22.849853 | 5.077155  |
| H | -5.584430 | 23.604463 | 4.280858  |
| C | -4.572557 | 21.724773 | 4.694176  |
| H | -3.684668 | 22.177147 | 4.237206  |
| H | -5.026408 | 21.113826 | 3.905936  |
| C | -1.076045 | 21.442612 | 3.177260  |
| H | -1.483123 | 22.386384 | 2.798344  |
| H | -0.014383 | 21.591794 | 3.401105  |
| H | -1.589450 | 21.215300 | 4.116854  |
| C | -6.971946 | 22.373716 | 5.374338  |
| H | -6.940765 | 21.531591 | 6.079844  |

|   |           |           |          |
|---|-----------|-----------|----------|
| C | -0.173453 | 21.292501 | 6.926712 |
| H | -1.218754 | 21.421250 | 6.628965 |
| H | 0.459989  | 21.741008 | 6.154243 |
| H | -0.021902 | 21.850631 | 7.857117 |
| C | -6.391031 | 16.875986 | 2.099449 |
| H | -7.195383 | 17.419203 | 1.592607 |
| H | -6.852749 | 16.058805 | 2.662676 |
| H | -5.746207 | 16.439665 | 1.330108 |
| C | -7.805778 | 21.963522 | 4.188540 |
| H | -8.792897 | 21.574983 | 4.442006 |
| H | -5.158570 | 23.362902 | 5.965761 |
| C | -7.474650 | 22.042522 | 2.901599 |
| H | -7.520776 | 23.164273 | 5.904847 |
| H | -8.169189 | 21.732416 | 2.126394 |
| H | -6.505880 | 22.402022 | 2.568369 |

7d.log

SCF (wb97x) = -1740.71109336  
E(SCF)+ZPE(0 K)= -1739.880475  
H(298 K)= -1739.834745  
G(298 K)= -1739.959676  
Lowest Frequency = 8.6577cm-1

|    |           |           |           |
|----|-----------|-----------|-----------|
| Zn | -3.183416 | 19.226260 | 5.203955  |
| N  | -2.867785 | 18.321912 | 3.471529  |
| N  | -2.062606 | 17.967081 | 6.226747  |
| C  | -1.936812 | 18.275219 | 7.614694  |
| C  | -2.162365 | 17.212914 | 3.308867  |
| C  | -0.600752 | 16.050369 | 6.625812  |
| H  | 0.174786  | 16.648071 | 7.114277  |
| H  | -0.126779 | 15.235893 | 6.077692  |
| H  | -1.220378 | 15.627286 | 7.422680  |
| C  | -2.856169 | 17.729413 | 8.529891  |
| C  | -2.060654 | 16.613534 | 1.924960  |
| H  | -3.058037 | 16.375317 | 1.541996  |
| H  | -1.456983 | 15.705698 | 1.926866  |
| H  | -1.618413 | 17.331643 | 1.227334  |
| C  | -1.494096 | 16.554442 | 4.355191  |
| H  | -0.945928 | 15.662351 | 4.079940  |
| C  | -2.776916 | 18.125945 | 9.864637  |
| H  | -3.482580 | 17.723078 | 10.585156 |
| C  | -4.838817 | 18.674860 | 2.071029  |
| C  | -1.434832 | 16.918153 | 5.710841  |
| C  | -3.496206 | 18.967439 | 2.366694  |
| C  | -4.818758 | 20.458393 | 0.429910  |
| H  | -5.340401 | 21.051515 | -0.314484 |
| C  | -5.481939 | 19.434849 | 1.093402  |
| H  | -6.521755 | 19.229502 | 0.854389  |
| C  | -0.956963 | 19.195866 | 8.026661  |
| C  | -2.795512 | 19.972459 | 1.673683  |
| C  | -1.332367 | 20.257847 | 1.985060  |
| H  | -0.913368 | 19.362632 | 2.454364  |
| C  | -3.943813 | 16.770903 | 8.068738  |
| H  | -3.652815 | 16.383243 | 7.088166  |
| C  | -4.255236 | 20.805050 | 5.649922  |
| H  | -5.139526 | 20.462097 | 6.206193  |
| H  | -3.700009 | 21.428666 | 6.365557  |
| C  | 0.015455  | 19.814704 | 7.033937  |
| H  | -0.104290 | 19.292628 | 6.080106  |
| C  | -0.914853 | 19.562532 | 9.372439  |
| H  | -0.169387 | 20.278583 | 9.707282  |
| C  | -3.483083 | 20.714716 | 0.714002  |

|   |           |           |           |
|---|-----------|-----------|-----------|
| H | -2.969219 | 21.508334 | 0.180323  |
| C | -5.591776 | 17.587296 | 2.821805  |
| H | -4.856364 | 16.991930 | 3.370644  |
| C | -6.546158 | 18.198633 | 3.857101  |
| H | -6.007933 | 18.844813 | 4.557972  |
| H | -7.049527 | 17.415204 | 4.433229  |
| H | -7.315754 | 18.806655 | 3.368145  |
| C | -4.114029 | 15.567482 | 9.002382  |
| H | -3.162434 | 15.052464 | 9.166916  |
| H | -4.819742 | 14.851704 | 8.569355  |
| H | -4.508932 | 15.861679 | 9.980349  |
| C | -5.272870 | 17.518275 | 7.885446  |
| H | -5.616294 | 17.935473 | 8.838348  |
| H | -6.049345 | 16.845222 | 7.506705  |
| H | -5.166133 | 18.348396 | 7.180486  |
| C | -1.815463 | 19.035299 | 10.287734 |
| H | -1.770978 | 19.334488 | 11.330267 |
| C | -0.503035 | 20.538775 | 0.726952  |
| H | -0.636341 | 19.752561 | -0.022419 |
| H | 0.559819  | 20.592241 | 0.982378  |
| H | -0.772860 | 21.493678 | 0.263975  |
| C | 1.476380  | 19.646131 | 7.468402  |
| H | 1.690279  | 20.196785 | 8.390467  |
| H | 2.149479  | 20.027438 | 6.693917  |
| H | 1.720858  | 18.594024 | 7.644486  |
| C | -5.453651 | 22.944194 | 4.835955  |
| H | -5.715212 | 23.484643 | 3.917682  |
| C | -4.698709 | 21.662133 | 4.454860  |
| H | -3.829343 | 21.955943 | 3.856170  |
| H | -5.315303 | 21.064209 | 3.771735  |
| C | -1.187118 | 21.402910 | 2.996787  |
| H | -1.617587 | 22.328813 | 2.600194  |
| H | -0.131661 | 21.585623 | 3.224879  |
| H | -1.699020 | 21.176069 | 3.937283  |
| C | -6.723101 | 22.726455 | 5.665766  |
| H | -6.460052 | 22.291813 | 6.637041  |
| C | -0.322279 | 21.292960 | 6.793599  |
| H | -1.354854 | 21.411079 | 6.451037  |
| H | 0.340744  | 21.724109 | 6.036187  |
| H | -0.209510 | 21.874522 | 7.715120  |
| C | -6.338831 | 16.635865 | 1.879951  |
| H | -7.156020 | 17.141648 | 1.355262  |
| H | -6.777735 | 15.809262 | 2.447518  |
| H | -5.667503 | 16.214322 | 1.125356  |
| C | -7.763582 | 21.818107 | 4.988337  |
| H | -7.330259 | 20.827887 | 4.812191  |
| H | -4.777693 | 23.597254 | 5.403999  |
| C | -8.270535 | 22.385096 | 3.693099  |
| H | -7.181471 | 23.700683 | 5.879781  |
| H | -8.878917 | 23.287151 | 3.774742  |
| C | -8.000595 | 21.895912 | 2.485632  |
| H | -8.606726 | 21.675196 | 5.676138  |
| H | -7.374502 | 21.015926 | 2.359697  |
| H | -8.379393 | 22.363744 | 1.581754  |

ts4a.log

SCF (wB97x) = -1396.43036181  
 E(SCF)+ZPE(0 K)= -1395.692007  
 H(298 K)= -1395.651060  
 G(298 K)= -1395.763338  
 Lowest Frequency = -727.4785cm<sup>-1</sup>

|    |           |           |           |
|----|-----------|-----------|-----------|
| Mg | 5.858888  | 0.762801  | 1.609651  |
| N  | 5.930566  | 2.780197  | 1.659706  |
| C  | 5.141416  | 4.981475  | 2.384407  |
| H  | 5.579058  | 5.491978  | 1.523112  |
| H  | 5.859818  | 5.081118  | 3.205128  |
| H  | 4.216165  | 5.485980  | 2.663557  |
| N  | 3.833323  | 0.744082  | 1.492326  |
| C  | 4.910916  | 3.515902  | 2.087592  |
| C  | 3.610064  | 3.018160  | 2.277038  |
| H  | 2.885523  | 3.728703  | 2.655188  |
| C  | 3.090276  | 1.759143  | 1.906320  |
| C  | 1.587972  | 1.594422  | 2.001251  |
| H  | 1.089462  | 2.560662  | 2.083909  |
| H  | 1.333086  | 0.998716  | 2.883711  |
| H  | 1.195273  | 1.061951  | 1.131752  |
| C  | 7.121480  | 3.407165  | 1.192369  |
| C  | 8.234877  | 3.544013  | 2.039922  |
| C  | 9.409535  | 4.087543  | 1.517011  |
| H  | 10.279240 | 4.194155  | 2.159626  |
| C  | 9.485894  | 4.492787  | 0.191674  |
| H  | 10.405723 | 4.918870  | -0.196660 |
| C  | 8.381044  | 4.343898  | -0.637350 |
| H  | 8.446747  | 4.657685  | -1.675772 |
| C  | 7.190724  | 3.793551  | -0.162627 |
| C  | 8.186981  | 3.082041  | 3.487009  |
| H  | 7.149027  | 2.821128  | 3.716462  |
| C  | 9.033416  | 1.815519  | 3.676445  |
| H  | 10.088465 | 2.014911  | 3.457792  |
| H  | 8.693604  | 1.014501  | 3.012989  |
| H  | 8.961177  | 1.452221  | 4.706898  |
| C  | 8.614116  | 4.183510  | 4.464876  |
| H  | 9.669975  | 4.446176  | 4.340001  |
| H  | 8.478646  | 3.848266  | 5.497991  |
| H  | 8.026323  | 5.095453  | 4.320966  |
| C  | 6.002153  | 3.627945  | -1.100567 |
| H  | 5.221700  | 3.086457  | -0.558216 |
| C  | 5.418416  | 4.985321  | -1.516272 |
| H  | 5.105070  | 5.571144  | -0.647729 |
| H  | 4.543288  | 4.844309  | -2.159257 |
| H  | 6.153511  | 5.577358  | -2.072542 |
| C  | 6.358968  | 2.796512  | -2.338484 |
| H  | 7.137853  | 3.276638  | -2.940049 |
| H  | 5.477016  | 2.679179  | -2.977109 |
| H  | 6.713145  | 1.799874  | -2.060487 |
| C  | 3.230895  | -0.458219 | 1.021023  |
| C  | 2.818020  | -1.454315 | 1.925416  |
| C  | 2.286986  | -2.639050 | 1.412052  |
| H  | 1.966585  | -3.419396 | 2.096535  |
| C  | 2.167799  | -2.840531 | 0.045235  |
| H  | 1.746615  | -3.765785 | -0.335507 |
| C  | 2.606652  | -1.860790 | -0.836955 |
| H  | 2.528761  | -2.038628 | -1.904194 |
| C  | 3.156143  | -0.665296 | -0.373763 |
| C  | 2.980519  | -1.293080 | 3.429607  |
| H  | 3.237592  | -0.249596 | 3.633017  |
| C  | 1.690771  | -1.613239 | 4.196558  |
| H  | 1.440212  | -2.677647 | 4.138160  |
| H  | 0.837156  | -1.051243 | 3.804923  |
| H  | 1.808938  | -1.364082 | 5.255707  |
| C  | 4.147235  | -2.151688 | 3.939500  |
| H  | 3.974400  | -3.211889 | 3.722968  |
| H  | 4.262069  | -2.040327 | 5.022987  |
| H  | 5.086545  | -1.845825 | 3.467671  |

|   |          |           |           |
|---|----------|-----------|-----------|
| C | 3.665884 | 0.392043  | -1.346326 |
| H | 4.539691 | 0.864304  | -0.882863 |
| C | 2.637930 | 1.507928  | -1.580947 |
| H | 1.705859 | 1.097368  | -1.984531 |
| H | 3.028120 | 2.237303  | -2.299533 |
| H | 2.407323 | 2.045467  | -0.658195 |
| C | 4.125481 | -0.195567 | -2.684097 |
| H | 4.811644 | -1.036286 | -2.541800 |
| H | 4.643308 | 0.568946  | -3.269216 |
| H | 3.280844 | -0.546180 | -3.286920 |
| H | 6.707550 | -0.438389 | 2.636079  |
| C | 7.173806 | -0.177127 | -0.016612 |
| C | 7.460531 | -0.956587 | 1.081493  |
| C | 8.662126 | -1.528689 | 1.732127  |
| C | 7.456811 | -2.404457 | 1.390250  |
| H | 6.433649 | -0.515846 | -0.738703 |
| H | 8.844912 | -1.334255 | 2.781676  |
| H | 9.547944 | -1.601385 | 1.107739  |
| H | 6.864347 | -2.770128 | 2.219640  |
| H | 7.525060 | -3.072808 | 0.536884  |
| H | 7.840501 | 0.634826  | -0.301216 |

ts4b.log

SCF (wB97x) = -1435.77842766  
E(SCF)+ZPE(0 K)= -1435.006071  
H(298 K)= -1434.964557  
G(298 K)= -1435.077367  
Lowest Frequency = -422.7056cm-1

|   |           |           |           |
|---|-----------|-----------|-----------|
| N | -1.708743 | -1.086297 | -0.793867 |
| N | 1.240079  | -1.338782 | -0.742330 |
| C | 0.983470  | -2.037806 | -1.844415 |
| C | 2.512005  | -1.470401 | -0.110624 |
| C | -2.971149 | -0.984006 | -0.140990 |
| C | 3.586112  | -0.631214 | -0.460354 |
| C | -1.548925 | -1.844443 | -1.865433 |
| C | -3.373546 | -1.996648 | 0.753092  |
| C | 0.056213  | 2.121107  | 0.014370  |
| C | -3.752560 | 0.175922  | -0.317259 |
| C | 2.649814  | -2.426334 | 0.920850  |
| C | -3.342365 | 1.254061  | -1.307861 |
| H | -2.264759 | 1.159034  | -1.470873 |
| C | 3.438116  | 0.491589  | -1.475131 |
| H | 2.415685  | 0.456393  | -1.865155 |
| C | -0.292887 | -2.173463 | -2.418136 |
| H | -0.334219 | -2.750060 | -3.335036 |
| C | -2.739492 | -2.470561 | -2.563884 |
| H | -2.694241 | -3.559243 | -2.467312 |
| H | -2.698975 | -2.238671 | -3.632044 |
| H | -3.691694 | -2.125446 | -2.160989 |
| C | 3.898913  | -2.578799 | 1.522162  |
| H | 4.031054  | -3.317741 | 2.305406  |
| C | -0.236891 | -0.000085 | 2.277143  |
| H | 0.463765  | -0.814647 | 2.497094  |
| H | -1.224903 | -0.427763 | 2.023003  |
| C | -2.550626 | -3.258992 | 0.968785  |
| H | -1.636476 | -3.176482 | 0.373363  |
| C | 4.814829  | -0.815867 | 0.177549  |
| H | 5.654370  | -0.180185 | -0.090865 |
| C | -4.944986 | 0.291629  | 0.397769  |
| H | -5.564037 | 1.173477  | 0.264267  |
| C | 1.461719  | -3.265870 | 1.377701  |

|    |           |           |           |
|----|-----------|-----------|-----------|
| H  | 0.561475  | -2.662405 | 1.216478  |
| C  | 2.115485  | -2.756341 | -2.549457 |
| H  | 2.768187  | -2.026203 | -3.036326 |
| H  | 1.738136  | -3.442488 | -3.308102 |
| H  | 2.733260  | -3.313636 | -1.841447 |
| C  | 4.981269  | -1.792027 | 1.147237  |
| H  | 5.945863  | -1.928794 | 1.626073  |
| C  | -4.574157 | -1.834773 | 1.446344  |
| H  | -4.900086 | -2.610686 | 2.133826  |
| C  | -5.358314 | -0.703179 | 1.274305  |
| H  | -6.289397 | -0.595402 | 1.821807  |
| C  | 4.405510  | 0.349482  | -2.658399 |
| H  | 5.446258  | 0.445508  | -2.330893 |
| H  | 4.218608  | 1.132492  | -3.400126 |
| H  | 4.306722  | -0.619542 | -3.154754 |
| C  | -2.128689 | -3.423981 | 2.433895  |
| H  | -1.517460 | -2.582162 | 2.772627  |
| H  | -1.544331 | -4.342347 | 2.553593  |
| H  | -2.997699 | -3.498489 | 3.095993  |
| C  | 3.639019  | 1.855660  | -0.797825 |
| H  | 2.992267  | 1.966483  | 0.076568  |
| H  | 3.417261  | 2.671121  | -1.494098 |
| H  | 4.673997  | 1.975987  | -0.459911 |
| C  | -3.605902 | 2.673507  | -0.794100 |
| H  | -4.676065 | 2.903466  | -0.756619 |
| H  | -3.140756 | 3.405736  | -1.461552 |
| H  | -3.195272 | 2.819108  | 0.209544  |
| C  | 1.286858  | -4.544168 | 0.545246  |
| H  | 1.071601  | -4.319924 | -0.502177 |
| H  | 0.450197  | -5.135504 | 0.934080  |
| H  | 2.189768  | -5.163271 | 0.588696  |
| C  | -3.310318 | -4.504378 | 0.489378  |
| H  | -4.197038 | -4.685931 | 1.106586  |
| H  | -2.671320 | -5.391237 | 0.553276  |
| H  | -3.645118 | -4.396321 | -0.545622 |
| C  | 1.526701  | -3.610494 | 2.869575  |
| H  | 2.314977  | -4.339615 | 3.085258  |
| H  | 0.582026  | -4.053859 | 3.193590  |
| H  | 1.710976  | -2.721048 | 3.479742  |
| C  | -4.028683 | 1.035592  | -2.664167 |
| H  | -3.774236 | 0.060139  | -3.086782 |
| H  | -3.721976 | 1.805486  | -3.379760 |
| H  | -5.118148 | 1.083288  | -2.557567 |
| H  | 0.918321  | 2.394235  | -0.589868 |
| H  | -0.873506 | 2.624197  | -0.242599 |
| C  | 0.270460  | 1.824870  | 1.389269  |
| H  | 1.311467  | 1.746399  | 1.711364  |
| Mg | -0.140167 | -0.051852 | 0.006670  |
| C  | -0.653462 | 2.234725  | 2.518485  |
| C  | -0.415345 | 1.016874  | 3.403854  |
| H  | 0.521289  | 1.134910  | 3.959959  |
| H  | -1.205844 | 0.791107  | 4.125937  |
| H  | -0.425429 | 3.227522  | 2.925549  |
| H  | -1.688592 | 2.245114  | 2.155375  |

ts4c.log

SCF (wB97x) = -1475.09642768  
E(SCF)+ZPE(0 K)= -1474.297595  
H(298 K)= -1474.255096  
G(298 K)= -1474.370455  
Lowest Frequency = -764.4157cm-1

|    |           |           |           |
|----|-----------|-----------|-----------|
| Mg | 6.135212  | 1.060851  | 1.328688  |
| N  | 6.233059  | 3.056866  | 1.639083  |
| C  | 5.417438  | 5.369500  | 1.577586  |
| H  | 6.188115  | 5.640659  | 2.302490  |
| H  | 4.496767  | 5.903128  | 1.816907  |
| H  | 5.765181  | 5.710265  | 0.596143  |
| N  | 4.120621  | 1.037418  | 1.508896  |
| C  | 5.193549  | 3.872088  | 1.542558  |
| C  | 3.863280  | 3.433306  | 1.389164  |
| H  | 3.120858  | 4.216207  | 1.291875  |
| C  | 3.358910  | 2.118235  | 1.429852  |
| C  | 1.854002  | 1.962874  | 1.360192  |
| H  | 1.561553  | 1.683469  | 0.342029  |
| H  | 1.346284  | 2.893247  | 1.617573  |
| H  | 1.504624  | 1.168122  | 2.023054  |
| C  | 7.538814  | 3.532138  | 1.947508  |
| C  | 7.992461  | 3.408766  | 3.279895  |
| C  | 9.304953  | 3.778011  | 3.570508  |
| H  | 9.672559  | 3.696396  | 4.588293  |
| C  | 10.159708 | 4.236071  | 2.574290  |
| H  | 11.180758 | 4.512128  | 2.818610  |
| C  | 9.706858  | 4.328989  | 1.266399  |
| H  | 10.384519 | 4.672685  | 0.489863  |
| C  | 8.396459  | 3.983629  | 0.928174  |
| C  | 7.059840  | 2.889123  | 4.365867  |
| H  | 6.391671  | 2.163601  | 3.890447  |
| C  | 7.785023  | 2.161352  | 5.501280  |
| H  | 8.353125  | 2.852779  | 6.133291  |
| H  | 8.475520  | 1.402306  | 5.122383  |
| H  | 7.054143  | 1.662445  | 6.145310  |
| C  | 6.171881  | 4.005116  | 4.934968  |
| H  | 6.784768  | 4.807452  | 5.360383  |
| H  | 5.527674  | 3.611014  | 5.728188  |
| H  | 5.524946  | 4.436814  | 4.168111  |
| C  | 7.940779  | 4.064120  | -0.520805 |
| H  | 6.856472  | 3.922727  | -0.539523 |
| C  | 8.241477  | 5.431116  | -1.148219 |
| H  | 7.841578  | 6.247421  | -0.538611 |
| H  | 7.795869  | 5.496678  | -2.145807 |
| H  | 9.318131  | 5.596991  | -1.259803 |
| C  | 8.554305  | 2.926542  | -1.349069 |
| H  | 9.649103  | 2.965765  | -1.321022 |
| H  | 8.238543  | 2.997286  | -2.395450 |
| H  | 8.232131  | 1.952621  | -0.965750 |
| C  | 3.568697  | -0.260188 | 1.702895  |
| C  | 3.585018  | -0.800274 | 3.008355  |
| C  | 3.136834  | -2.107801 | 3.190515  |
| H  | 3.135096  | -2.541251 | 4.185342  |
| C  | 2.704564  | -2.875519 | 2.115052  |
| H  | 2.365716  | -3.894263 | 2.275776  |
| C  | 2.718167  | -2.339583 | 0.835656  |
| H  | 2.394774  | -2.950373 | -0.002595 |
| C  | 3.145474  | -1.030109 | 0.604420  |
| C  | 4.078270  | 0.035699  | 4.181982  |
| H  | 4.864712  | 0.692609  | 3.796092  |
| C  | 2.972814  | 0.944317  | 4.738929  |
| H  | 2.115385  | 0.349527  | 5.072718  |
| H  | 2.624030  | 1.660749  | 3.991981  |
| H  | 3.346038  | 1.515044  | 5.595975  |
| C  | 4.695886  | -0.795000 | 5.310424  |
| H  | 3.938523  | -1.363088 | 5.861724  |
| H  | 5.188059  | -0.132227 | 6.029003  |
| H  | 5.442683  | -1.500332 | 4.934591  |

|   |           |           |           |
|---|-----------|-----------|-----------|
| C | 3.182898  | -0.483534 | -0.814610 |
| H | 3.370505  | 0.592252  | -0.755008 |
| C | 1.850929  | -0.681562 | -1.549012 |
| H | 1.648274  | -1.740328 | -1.741554 |
| H | 1.872937  | -0.172073 | -2.517507 |
| H | 1.011998  | -0.283129 | -0.969890 |
| C | 4.347851  | -1.097386 | -1.603727 |
| H | 5.306028  | -0.845307 | -1.137185 |
| H | 4.362848  | -0.715096 | -2.630013 |
| H | 4.260379  | -2.188811 | -1.648755 |
| H | 7.024548  | 0.226897  | -0.017446 |
| C | 7.444118  | -2.000309 | 0.563316  |
| C | 7.821423  | -0.692745 | 1.229831  |
| C | 9.187421  | -0.324229 | 0.686611  |
| C | 9.243705  | -0.905305 | -0.738149 |
| C | 8.118492  | -1.975594 | -0.819947 |
| H | 7.875027  | -2.791794 | 1.192091  |
| H | 6.364154  | -2.168064 | 0.530847  |
| H | 9.393401  | 0.748319  | 0.739432  |
| H | 9.915000  | -0.824942 | 1.340261  |
| H | 9.070576  | -0.119854 | -1.477537 |
| H | 10.228408 | -1.332082 | -0.947831 |
| H | 7.394483  | -1.701808 | -1.590989 |
| H | 8.510899  | -2.961815 | -1.082835 |
| C | 7.382242  | -0.329872 | 2.512114  |
| H | 8.033674  | 0.288403  | 3.126310  |
| H | 6.693812  | -0.994369 | 3.030223  |

ts4d.log

SCF (wB97x) = -1514.41023348  
E(SCF)+ZPE(0 K)= -1513.581787  
H(298 K)= -1513.538299  
G(298 K)= -1513.655546  
Lowest Frequency = -786.2026cm<sup>-1</sup>

|    |           |          |           |
|----|-----------|----------|-----------|
| Mg | 5.930437  | 0.979328 | 1.296479  |
| N  | 5.991081  | 2.965044 | 1.662329  |
| C  | 5.255449  | 5.081980 | 2.638833  |
| H  | 6.105084  | 5.145719 | 3.326260  |
| H  | 4.380373  | 5.523585 | 3.116118  |
| H  | 5.516521  | 5.678940 | 1.760652  |
| N  | 3.907839  | 0.932844 | 1.490449  |
| C  | 5.010173  | 3.641883 | 2.247362  |
| C  | 3.737503  | 3.108997 | 2.512584  |
| H  | 3.047254  | 3.766975 | 3.026642  |
| C  | 3.201288  | 1.870937 | 2.095590  |
| C  | 1.734347  | 1.639653 | 2.391819  |
| H  | 1.188271  | 2.583606 | 2.429759  |
| H  | 1.633479  | 1.152028 | 3.367528  |
| H  | 1.272341  | 0.985974 | 1.649394  |
| C  | 7.163172  | 3.623120 | 1.191533  |
| C  | 8.330957  | 3.630742 | 1.976582  |
| C  | 9.504441  | 4.144753 | 1.421871  |
| H  | 10.416303 | 4.147646 | 2.012928  |
| C  | 9.526299  | 4.653447 | 0.130299  |
| H  | 10.448121 | 5.048931 | -0.284789 |
| C  | 8.360911  | 4.659584 | -0.626053 |
| H  | 8.379995  | 5.066451 | -1.633775 |
| C  | 7.167249  | 4.147316 | -0.118263 |
| C  | 8.331228  | 3.092806 | 3.399306  |
| H  | 7.292288  | 2.884042 | 3.672654  |
| C  | 9.104797  | 1.771099 | 3.498710  |

|   |           |           |           |
|---|-----------|-----------|-----------|
| H | 10.143269 | 1.897907  | 3.172718  |
| H | 8.641783  | 0.994605  | 2.881519  |
| H | 9.115775  | 1.408786  | 4.532111  |
| C | 8.873754  | 4.123589  | 4.398136  |
| H | 9.938740  | 4.320817  | 4.235960  |
| H | 8.759779  | 3.755916  | 5.422791  |
| H | 8.343680  | 5.077586  | 4.315478  |
| C | 5.906680  | 4.174166  | -0.972977 |
| H | 5.096704  | 3.724107  | -0.391644 |
| C | 5.491940  | 5.612721  | -1.313196 |
| H | 5.359645  | 6.218521  | -0.412075 |
| H | 4.546601  | 5.617031  | -1.865492 |
| H | 6.245488  | 6.105945  | -1.936788 |
| C | 6.061599  | 3.345494  | -2.254451 |
| H | 6.866240  | 3.733628  | -2.888263 |
| H | 5.134724  | 3.376970  | -2.837602 |
| H | 6.284333  | 2.300186  | -2.026503 |
| C | 3.325513  | -0.265395 | 0.991708  |
| C | 3.113297  | -1.366498 | 1.841654  |
| C | 2.680369  | -2.568216 | 1.276772  |
| H | 2.520628  | -3.430023 | 1.918901  |
| C | 2.461433  | -2.684297 | -0.087428 |
| H | 2.127568  | -3.627486 | -0.508519 |
| C | 2.675947  | -1.588844 | -0.916546 |
| H | 2.507198  | -1.692934 | -1.983049 |
| C | 3.114445  | -0.369375 | -0.402096 |
| C | 3.365510  | -1.292267 | 3.339971  |
| H | 3.606032  | -0.255627 | 3.591533  |
| C | 2.120097  | -1.692002 | 4.143288  |
| H | 1.883656  | -2.753411 | 4.013250  |
| H | 1.241419  | -1.117609 | 3.834257  |
| H | 2.285327  | -1.521102 | 5.211817  |
| C | 4.576874  | -2.143861 | 3.743679  |
| H | 4.427961  | -3.195097 | 3.472439  |
| H | 4.734697  | -2.094297 | 4.826366  |
| H | 5.483692  | -1.781814 | 3.249613  |
| C | 3.352597  | 0.829738  | -1.311511 |
| H | 4.214643  | 1.375907  | -0.911416 |
| C | 2.163697  | 1.801435  | -1.287356 |
| H | 1.249409  | 1.301364  | -1.625172 |
| H | 2.354172  | 2.650455  | -1.952765 |
| H | 1.986716  | 2.198375  | -0.285348 |
| C | 3.684526  | 0.443869  | -2.755692 |
| H | 4.483773  | -0.302041 | -2.806106 |
| H | 4.012809  | 1.327695  | -3.309735 |
| H | 2.811161  | 0.039607  | -3.279021 |
| H | 6.849840  | -0.380787 | 2.065469  |
| C | 6.599789  | -2.183470 | 0.465707  |
| C | 7.309058  | -0.841890 | 0.433502  |
| C | 8.782301  | -0.939726 | 0.776709  |
| C | 9.456418  | -1.864126 | -0.252964 |
| C | 8.772539  | -3.235160 | -0.295853 |
| C | 7.269223  | -3.108136 | -0.565586 |
| H | 9.244383  | 0.052608  | 0.766390  |
| H | 6.688023  | -2.626768 | 1.462622  |
| H | 5.533089  | -2.066789 | 0.248319  |
| H | 9.405051  | -1.396937 | -1.243578 |
| H | 10.516869 | -1.974591 | -0.002330 |
| H | 9.242068  | -3.867230 | -1.057392 |
| H | 8.920883  | -3.739242 | 0.669091  |
| H | 7.108539  | -2.703250 | -1.571931 |
| H | 6.790383  | -4.092534 | -0.533424 |
| H | 8.904696  | -1.354850 | 1.782819  |

|   |          |           |           |
|---|----------|-----------|-----------|
| C | 6.897069 | 0.107051  | -0.515939 |
| H | 7.623167 | 0.829191  | -0.885968 |
| H | 6.063020 | -0.138176 | -1.169962 |

ts5a.log

SCF (wB97x) = -1622.69435025  
 E(SCF)+ZPE(0 K)= -1621.955379  
 H(298 K)= -1621.914451  
 G(298 K)= -1622.025788  
 Lowest Frequency = -778.5513cm-1

|    |           |           |           |
|----|-----------|-----------|-----------|
| Zn | 5.719909  | 0.730969  | 1.510310  |
| N  | 5.968471  | 2.700385  | 1.477527  |
| C  | 5.306672  | 4.988886  | 2.071788  |
| H  | 6.160448  | 5.310408  | 1.473432  |
| H  | 5.536391  | 5.195171  | 3.122752  |
| H  | 4.431591  | 5.582356  | 1.799862  |
| N  | 3.766723  | 0.763003  | 1.600279  |
| C  | 5.021618  | 3.511370  | 1.903577  |
| C  | 3.715767  | 3.089639  | 2.244170  |
| H  | 3.062552  | 3.867349  | 2.621265  |
| C  | 3.117286  | 1.840111  | 2.026720  |
| C  | 1.629947  | 1.726836  | 2.277266  |
| H  | 1.219313  | 2.660316  | 2.662871  |
| H  | 1.432011  | 0.925563  | 2.996379  |
| H  | 1.099939  | 1.462359  | 1.358613  |
| C  | 7.268618  | 3.139752  | 1.109289  |
| C  | 8.243410  | 3.371754  | 2.096550  |
| C  | 9.543366  | 3.672354  | 1.684183  |
| H  | 10.311058 | 3.849258  | 2.432762  |
| C  | 9.872144  | 3.747620  | 0.339038  |
| H  | 10.888233 | 3.983486  | 0.038269  |
| C  | 8.896078  | 3.520013  | -0.624501 |
| H  | 9.164665  | 3.580349  | -1.673915 |
| C  | 7.586230  | 3.206694  | -0.264255 |
| C  | 7.922882  | 3.308725  | 3.583159  |
| H  | 6.847047  | 3.149734  | 3.692681  |
| C  | 8.615429  | 2.121547  | 4.264558  |
| H  | 9.701470  | 2.158696  | 4.123597  |
| H  | 8.238437  | 1.178111  | 3.859518  |
| H  | 8.415158  | 2.128104  | 5.341147  |
| C  | 8.277112  | 4.626373  | 4.287169  |
| H  | 9.359446  | 4.792879  | 4.303538  |
| H  | 7.931069  | 4.609083  | 5.325636  |
| H  | 7.818554  | 5.483729  | 3.785480  |
| C  | 6.510996  | 2.963900  | -1.315170 |
| H  | 5.840966  | 2.193421  | -0.919234 |
| C  | 5.658931  | 4.220068  | -1.547737 |
| H  | 5.157518  | 4.542055  | -0.631982 |
| H  | 4.886388  | 4.021558  | -2.298703 |
| H  | 6.279674  | 5.048340  | -1.906858 |
| C  | 7.066027  | 2.449372  | -2.646177 |
| H  | 7.621757  | 3.225397  | -3.183859 |
| H  | 6.243960  | 2.132916  | -3.294433 |
| H  | 7.733413  | 1.593529  | -2.504226 |
| C  | 3.060680  | -0.357168 | 1.078722  |
| C  | 2.856709  | -1.495133 | 1.877306  |
| C  | 2.233597  | -2.606597 | 1.307894  |
| H  | 2.073428  | -3.495611 | 1.911893  |
| C  | 1.819079  | -2.596171 | -0.017107 |
| H  | 1.333198  | -3.468299 | -0.443573 |
| C  | 2.034773  | -1.466732 | -0.796804 |

|   |          |           |           |
|---|----------|-----------|-----------|
| H | 1.716068 | -1.465835 | -1.835991 |
| C | 2.661231 | -0.335945 | -0.273177 |
| C | 3.338572 | -1.537690 | 3.317517  |
| H | 3.669032 | -0.529306 | 3.583384  |
| C | 2.226258 | -1.936731 | 4.294271  |
| H | 1.888120 | -2.964576 | 4.124426  |
| H | 1.355909 | -1.280258 | 4.196698  |
| H | 2.586347 | -1.875228 | 5.326194  |
| C | 4.552670 | -2.467537 | 3.447407  |
| H | 4.282407 | -3.500798 | 3.201823  |
| H | 4.945112 | -2.451771 | 4.469705  |
| H | 5.353806 | -2.155917 | 2.771062  |
| C | 2.906521 | 0.875514  | -1.163278 |
| H | 3.424101 | 1.632547  | -0.567739 |
| C | 1.591944 | 1.492270  | -1.660466 |
| H | 1.038143 | 0.790363  | -2.293468 |
| H | 1.792793 | 2.390388  | -2.253695 |
| H | 0.939633 | 1.776913  | -0.829982 |
| C | 3.818275 | 0.531491  | -2.347988 |
| H | 4.781437 | 0.145665  | -2.004913 |
| H | 4.004430 | 1.426677  | -2.951595 |
| H | 3.362733 | -0.221079 | -3.000682 |
| H | 6.721729 | -0.011293 | 2.604997  |
| C | 6.596880 | -0.494123 | -0.031576 |
| C | 7.333474 | -0.696697 | 1.137288  |
| C | 8.777848 | -0.600064 | 1.452883  |
| C | 7.979932 | -1.850781 | 1.813050  |
| H | 5.857052 | -1.229623 | -0.336948 |
| H | 9.107629 | 0.033868  | 2.266147  |
| H | 9.447586 | -0.634102 | 0.599082  |
| H | 7.790017 | -2.029813 | 2.864637  |
| H | 8.107088 | -2.741342 | 1.204468  |
| H | 6.992218 | 0.180260  | -0.784778 |

ts5b.log

SCF (wB97x) = -1662.01968132  
E(SCF)+ZPE(0 K)= -1661.251107  
H(298 K)= -1661.209299  
G(298 K)= -1661.323860  
Lowest Frequency = -743.3706cm-1

|    |           |          |          |
|----|-----------|----------|----------|
| Zn | 5.663557  | 0.954997 | 0.763718 |
| N  | 5.917035  | 2.855924 | 1.190358 |
| C  | 5.199230  | 5.009850 | 2.121566 |
| H  | 6.138705  | 5.405416 | 1.733621 |
| H  | 5.262600  | 5.003875 | 3.214763 |
| H  | 4.382899  | 5.679375 | 1.841726 |
| N  | 3.733329  | 0.839131 | 1.116587 |
| C  | 4.921903  | 3.603923 | 1.631844 |
| C  | 3.586677  | 3.166540 | 1.741599 |
| H  | 2.886836  | 3.910876 | 2.104690 |
| C  | 3.050453  | 1.874480 | 1.570259 |
| C  | 1.611348  | 1.692649 | 2.005225 |
| H  | 1.015975  | 2.566089 | 1.730201 |
| H  | 1.574954  | 1.596954 | 3.095476 |
| H  | 1.159366  | 0.798133 | 1.574822 |
| C  | 7.276116  | 3.273401 | 1.203702 |
| C  | 8.038618  | 3.143684 | 2.380033 |
| C  | 9.397497  | 3.460290 | 2.326904 |
| H  | 10.000564 | 3.366881 | 3.226200 |
| C  | 9.991498  | 3.886677 | 1.147608 |
| H  | 11.049290 | 4.130009 | 1.126663 |

|   |          |           |           |
|---|----------|-----------|-----------|
| C | 9.228904 | 3.994081  | -0.009293 |
| H | 9.703635 | 4.318913  | -0.929669 |
| C | 7.869501 | 3.682497  | -0.008383 |
| C | 7.430568 | 2.657535  | 3.687474  |
| H | 6.363148 | 2.487216  | 3.521151  |
| C | 8.037073 | 1.316451  | 4.122224  |
| H | 9.114297 | 1.405750  | 4.301477  |
| H | 7.872037 | 0.555762  | 3.354027  |
| H | 7.569723 | 0.968705  | 5.049737  |
| C | 7.574611 | 3.706988  | 4.798355  |
| H | 8.625534 | 3.858712  | 5.067497  |
| H | 7.045256 | 3.384594  | 5.700793  |
| H | 7.170430 | 4.675593  | 4.489864  |
| C | 7.032951 | 3.801599  | -1.273560 |
| H | 6.219805 | 3.073508  | -1.188746 |
| C | 6.391959 | 5.192754  | -1.384472 |
| H | 5.730482 | 5.398307  | -0.539490 |
| H | 5.798283 | 5.269931  | -2.301346 |
| H | 7.162511 | 5.971376  | -1.410314 |
| C | 7.815442 | 3.475992  | -2.549974 |
| H | 8.542691 | 4.257973  | -2.794630 |
| H | 7.128389 | 3.398241  | -3.398109 |
| H | 8.357389 | 2.529331  | -2.462138 |
| C | 3.211109 | -0.482176 | 1.064944  |
| C | 3.237363 | -1.293750 | 2.214982  |
| C | 2.819927 | -2.621136 | 2.098599  |
| H | 2.832767 | -3.261175 | 2.976833  |
| C | 2.394400 | -3.137863 | 0.883127  |
| H | 2.072183 | -4.172182 | 0.813046  |
| C | 2.388709 | -2.328260 | -0.246529 |
| H | 2.063365 | -2.742677 | -1.195426 |
| C | 2.802680 | -0.998127 | -0.182258 |
| C | 3.718158 | -0.772216 | 3.561202  |
| H | 3.977618 | 0.283504  | 3.441828  |
| C | 2.618009 | -0.871362 | 4.627052  |
| H | 2.373539 | -1.915740 | 4.849296  |
| H | 1.697066 | -0.379881 | 4.299901  |
| H | 2.945716 | -0.402466 | 5.560490  |
| C | 4.989744 | -1.498092 | 4.020954  |
| H | 4.809667 | -2.570316 | 4.156556  |
| H | 5.336877 | -1.092036 | 4.977107  |
| H | 5.789948 | -1.367751 | 3.287080  |
| C | 2.793731 | -0.109323 | -1.416909 |
| H | 3.582247 | 0.637487  | -1.278492 |
| C | 1.463685 | 0.647958  | -1.543763 |
| H | 0.626061 | -0.054212 | -1.621336 |
| H | 1.464554 | 1.278114  | -2.439283 |
| H | 1.286084 | 1.293785  | -0.680555 |
| C | 3.095853 | -0.869241 | -2.712455 |
| H | 3.992871 | -1.489074 | -2.618599 |
| H | 3.254896 | -0.160797 | -3.531122 |
| H | 2.266185 | -1.521424 | -3.006676 |
| H | 6.576766 | -0.075449 | 1.692821  |
| C | 6.529137 | 0.075308  | -0.949613 |
| C | 7.113416 | -0.607900 | 0.138233  |
| C | 8.562588 | -0.604073 | 0.626585  |
| C | 8.266501 | -1.923575 | 1.386590  |
| C | 6.954430 | -2.065949 | 0.571316  |
| H | 5.767553 | -0.442019 | -1.525866 |
| H | 8.916654 | 0.262110  | 1.187970  |
| H | 9.220756 | -0.764382 | -0.235284 |
| H | 8.077022 | -1.755080 | 2.449049  |
| H | 8.999218 | -2.725443 | 1.278831  |

H 6.038087 -2.354394 1.089004  
H 7.084137 -2.706701 -0.308629  
H 7.135528 0.806188 -1.476746

ts5c.log

SCF (wB97x) = -1701.36000459  
E(SCF)+ZPE(0 K)= -1700.561525  
H(298 K)= -1700.518699  
G(298 K)= -1700.634972  
Lowest Frequency = -857.5434cm-1

Zn 6.071030 1.034760 1.512264  
N 6.258357 2.991088 1.726540  
C 5.463332 5.306244 1.593304  
H 6.373344 5.584970 2.127186  
H 4.614611 5.839499 2.025306  
H 5.574508 5.637052 0.554848  
N 4.103832 0.982665 1.572072  
C 5.228981 3.810349 1.617088  
C 3.891160 3.386051 1.485126  
H 3.159959 4.180505 1.394949  
C 3.368276 2.079825 1.492850  
C 1.864613 1.950122 1.366973  
H 1.603087 1.760473 0.320021  
H 1.363399 2.866538 1.681532  
H 1.480940 1.111883 1.951689  
C 7.595849 3.436363 1.904295  
C 8.158314 3.357013 3.196694  
C 9.508886 3.666635 3.350322  
H 9.962939 3.613109 4.334473  
C 10.290729 4.034235 2.260872  
H 11.342515 4.264562 2.399500  
C 9.722760 4.104799 0.997253  
H 10.339561 4.388476 0.148745  
C 8.372494 3.810851 0.793046  
C 7.294293 2.968352 4.388360  
H 6.544525 2.259127 4.023112  
C 8.073387 2.275609 5.510411  
H 8.727947 2.973158 6.044708  
H 8.691674 1.456372 5.131227  
H 7.375381 1.861561 6.244477  
C 6.538144 4.184046 4.944624  
H 7.240089 4.960511 5.268541  
H 5.929358 3.893138 5.807160  
H 5.869944 4.618792 4.197762  
C 7.789203 3.881508 -0.610103  
H 6.712356 3.707647 -0.537078  
C 8.000433 5.264721 -1.240357  
H 7.627307 6.061659 -0.589849  
H 7.477453 5.330176 -2.199839  
H 9.061028 5.461499 -1.429865  
C 8.357371 2.773709 -1.506816  
H 9.449282 2.839089 -1.575317  
H 7.949714 2.853286 -2.520150  
H 8.089779 1.790312 -1.109831  
C 3.532352 -0.313760 1.691464  
C 3.468046 -0.899574 2.974237  
C 2.997162 -2.207843 3.079600  
H 2.934310 -2.677860 4.055836  
C 2.616768 -2.928171 1.953024  
H 2.259284 -3.948174 2.055120  
C 2.699736 -2.341625 0.698420

H 2.409658 -2.913146 -0.178938  
C 3.152783 -1.029887 0.542689  
C 3.885245 -0.109316 4.207487  
H 4.674009 0.581261 3.893076  
C 2.725234 0.739321 4.748884  
H 1.870988 0.105201 5.011166  
H 2.390272 1.478536 4.017643  
H 3.036623 1.280526 5.648585  
C 4.463728 -0.983350 5.324662  
H 3.692696 -1.592094 5.809835  
H 4.907291 -0.348596 6.098048  
H 5.241668 -1.655900 4.951804  
C 3.254136 -0.419570 -0.846926  
H 3.462280 0.647466 -0.730762  
C 1.945286 -0.556439 -1.634800  
H 1.727631 -1.601513 -1.879227  
H 2.011547 -0.006716 -2.579060  
H 1.095011 -0.164688 -1.067796  
C 4.434304 -1.018930 -1.622480  
H 5.374212 -0.803947 -1.106432  
H 4.494964 -0.588733 -2.627831  
H 4.331222 -2.105277 -1.722494  
H 6.911483 0.401041 0.194152  
C 7.471041 -1.801975 0.631116  
C 7.708743 -0.515751 1.397587  
C 9.091655 -0.021736 0.994650  
C 9.418082 -0.701372 -0.357385  
C 8.215860 -1.618786 -0.694845  
H 7.944710 -2.593041 1.230014  
H 6.412910 -2.056189 0.531567  
H 9.156428 1.068147 0.968852  
H 9.778680 -0.360137 1.780185  
H 9.589018 0.032664 -1.148366  
H 10.336820 -1.288324 -0.267865  
H 7.562342 -1.130838 -1.423377  
H 8.529207 -2.573482 -1.125331  
C 7.179597 -0.283092 2.696687  
H 7.803397 0.256895 3.402737  
H 6.519728 -1.041443 3.110334

ts5d.log

SCF (wB97x) = -1740.67450594  
E(SCF)+ZPE(0 K)= -1739.845875  
H(298 K)= -1739.802166  
G(298 K)= -1739.920637  
Lowest Frequency = -857.4571cm-1

Zn 5.800544 0.958259 1.159863  
N 6.052824 2.871790 1.545427  
C 5.454925 4.997999 2.600578  
H 5.950145 4.960087 3.577204  
H 4.551710 5.601520 2.701451  
H 6.140847 5.490308 1.908539  
N 3.852740 0.917358 1.467137  
C 5.123963 3.589538 2.154238  
C 3.829201 3.120867 2.448226  
H 3.188945 3.818920 2.974291  
C 3.224758 1.899834 2.087952  
C 1.772197 1.724899 2.478034  
H 1.258725 2.687026 2.516674  
H 1.719183 1.273389 3.474876  
H 1.243905 1.062460 1.790021

|   |           |           |           |
|---|-----------|-----------|-----------|
| C | 7.300595  | 3.410636  | 1.129069  |
| C | 8.390528  | 3.447238  | 2.015648  |
| C | 9.629657  | 3.866896  | 1.526305  |
| H | 10.485011 | 3.894052  | 2.195914  |
| C | 9.787788  | 4.244855  | 0.200944  |
| H | 10.758395 | 4.569421  | -0.161246 |
| C | 8.699969  | 4.203672  | -0.664319 |
| H | 8.834992  | 4.496024  | -1.700746 |
| C | 7.445785  | 3.781836  | -0.225768 |
| C | 8.252444  | 3.023711  | 3.469732  |
| H | 7.190915  | 2.854664  | 3.670084  |
| C | 8.972101  | 1.694054  | 3.729812  |
| H | 10.038428 | 1.767421  | 3.488226  |
| H | 8.533180  | 0.897163  | 3.123632  |
| H | 8.881819  | 1.408025  | 4.783066  |
| C | 8.742977  | 4.114992  | 4.430257  |
| H | 9.824518  | 4.266817  | 4.348286  |
| H | 8.528653  | 3.834307  | 5.466414  |
| H | 8.257844  | 5.074580  | 4.226294  |
| C | 6.252791  | 3.733536  | -1.170842 |
| H | 5.613085  | 2.912432  | -0.833313 |
| C | 5.420108  | 5.021472  | -1.091061 |
| H | 5.012246  | 5.177083  | -0.089727 |
| H | 4.577187  | 4.973592  | -1.788657 |
| H | 6.029805  | 5.893675  | -1.352050 |
| C | 6.635065  | 3.443643  | -2.625342 |
| H | 7.143061  | 4.294167  | -3.093365 |
| H | 5.732247  | 3.244936  | -3.211344 |
| H | 7.289606  | 2.571056  | -2.707280 |
| C | 3.204330  | -0.262439 | 1.011675  |
| C | 3.024476  | -1.353552 | 1.879445  |
| C | 2.512086  | -2.541695 | 1.353410  |
| H | 2.373964  | -3.397588 | 2.008572  |
| C | 2.182898  | -2.649608 | 0.010268  |
| H | 1.787033  | -3.581724 | -0.380925 |
| C | 2.362505  | -1.560130 | -0.835266 |
| H | 2.104161  | -1.655662 | -1.884926 |
| C | 2.877873  | -0.355577 | -0.359255 |
| C | 3.387608  | -1.273367 | 3.354057  |
| H | 3.675570  | -0.241588 | 3.572903  |
| C | 2.193441  | -1.628796 | 4.249961  |
| H | 1.913801  | -2.682639 | 4.146144  |
| H | 1.313857  | -1.027294 | 4.000839  |
| H | 2.441756  | -1.456635 | 5.302164  |
| C | 4.601933  | -2.152790 | 3.678412  |
| H | 4.412160  | -3.201363 | 3.423101  |
| H | 4.837612  | -2.101832 | 4.746664  |
| H | 5.478663  | -1.812727 | 3.120987  |
| C | 3.070051  | 0.842279  | -1.279299 |
| H | 3.943047  | 1.389954  | -0.911028 |
| C | 1.870257  | 1.798460  | -1.209688 |
| H | 0.949111  | 1.285562  | -1.507918 |
| H | 2.020971  | 2.648538  | -1.883519 |
| H | 1.728638  | 2.195357  | -0.201946 |
| C | 3.352588  | 0.459767  | -2.735102 |
| H | 4.154820  | -0.279893 | -2.813779 |
| H | 3.655842  | 1.348099  | -3.297857 |
| H | 2.465056  | 0.050919  | -3.230705 |
| H | 6.740487  | -0.184541 | 1.959072  |
| C | 6.718176  | -2.071685 | 0.522071  |
| C | 7.179800  | -0.630792 | 0.391305  |
| C | 8.670485  | -0.462055 | 0.625113  |
| C | 9.415235  | -1.292309 | -0.434040 |

|   |           |           |           |
|---|-----------|-----------|-----------|
| C | 8.976772  | -2.760862 | -0.390764 |
| C | 7.457585  | -2.905599 | -0.537860 |
| H | 8.950922  | 0.594920  | 0.569124  |
| H | 6.962647  | -2.454020 | 1.519036  |
| H | 5.632783  | -2.142334 | 0.395886  |
| H | 9.212226  | -0.876023 | -1.427711 |
| H | 10.494110 | -1.211260 | -0.265145 |
| H | 9.488058  | -3.330578 | -1.174072 |
| H | 9.285174  | -3.196929 | 0.569494  |
| H | 7.150722  | -2.574692 | -1.537014 |
| H | 7.163367  | -3.955964 | -0.442103 |
| H | 8.936110  | -0.824816 | 1.624253  |
| C | 6.571849  | 0.168742  | -0.620417 |
| H | 7.188588  | 0.912172  | -1.118580 |
| H | 5.772894  | -0.276777 | -1.206463 |

ts6a.log

SCF (wB97x) = -1396.47990468  
E(SCF)+ZPE(0 K)= -1395.737553  
H(298 K)= -1395.696860  
G(298 K)= -1395.808279  
Lowest Frequency = -444.8702cm<sup>-1</sup>

|   |           |           |           |
|---|-----------|-----------|-----------|
| N | -1.775215 | -1.181987 | -0.857856 |
| N | 1.179893  | -1.342169 | -0.788721 |
| C | 0.954225  | -2.053841 | -1.886096 |
| C | 2.446281  | -1.403972 | -0.136838 |
| C | -3.056138 | -1.105550 | -0.241424 |
| C | 3.504575  | -0.556477 | -0.514626 |
| C | -1.582470 | -1.918613 | -1.940228 |
| C | -3.492663 | -2.154033 | 0.592715  |
| C | -0.035416 | 2.011903  | 0.279698  |
| C | -3.822919 | 0.068736  | -0.387955 |
| C | 2.585550  | -2.285509 | 0.959765  |
| C | -3.352030 | 1.198889  | -1.290500 |
| H | -2.261123 | 1.137581  | -1.353889 |
| C | 3.359462  | 0.480064  | -1.617613 |
| H | 2.350848  | 0.386923  | -2.032731 |
| C | -0.394446 | 1.440304  | 2.788716  |
| H | 0.137844  | 1.615897  | 3.722519  |
| H | -1.348638 | 1.967671  | 2.770832  |
| C | -0.313693 | -2.224227 | -2.472973 |
| H | -0.328002 | -2.802270 | -3.389733 |
| C | -2.755724 | -2.563178 | -2.650230 |
| H | -2.814477 | -3.620085 | -2.371176 |
| H | -2.610017 | -2.518350 | -3.732105 |
| H | -3.706432 | -2.094062 | -2.394986 |
| C | 3.817947  | -2.350152 | 1.608771  |
| H | 3.950184  | -3.030142 | 2.443586  |
| C | -0.458915 | -0.016682 | 2.312434  |
| H | 0.096769  | -0.726032 | 2.923234  |
| H | -1.502482 | -0.314741 | 2.139386  |
| C | -2.659345 | -3.408071 | 0.816808  |
| H | -1.765120 | -3.342478 | 0.190072  |
| C | 4.717424  | -0.652912 | 0.171873  |
| H | 5.544127  | -0.009357 | -0.116851 |
| C | -5.043884 | 0.154651  | 0.281572  |
| H | -5.653159 | 1.046105  | 0.170004  |
| C | 1.416236  | -3.146084 | 1.423765  |
| H | 0.501501  | -2.567762 | 1.251526  |
| C | 2.107137  | -2.749728 | -2.579780 |
| H | 2.658052  | -2.025303 | -3.187124 |



H 1.750522 -3.543544 -3.237032  
H 2.811027 -3.171672 -1.859258  
C 4.884019 -1.550176 1.214625  
H 5.835931 -1.617370 1.732097  
C -4.718718 -2.019379 1.246051  
H -5.068306 -2.820301 1.892059  
C -5.495252 -0.880010 1.091154  
H -6.447434 -0.794105 1.605274  
C 4.369383 0.267618 -2.754535  
H 5.394088 0.437552 -2.406887  
H 4.177613 0.969089 -3.572734  
H 4.325523 -0.747872 -3.156602  
C -2.187812 -3.504426 2.273575  
H -1.588841 -2.634424 2.558107  
H -1.577177 -4.402543 2.416200  
H -3.037467 -3.565805 2.962003  
C 3.507359 1.899933 -1.050371  
H 2.833845 2.067825 -0.206172  
H 3.286772 2.648597 -1.818261  
H 4.529097 2.075484 -0.696540  
C -3.693348 2.588344 -0.743094  
H -4.766417 2.800964 -0.799577  
H -3.179798 3.356423 -1.329585  
H -3.383124 2.692642 0.301110  
C 1.285638 -4.438527 0.604904  
H 1.093147 -4.232392 -0.450546  
H 0.452215 -5.042289 0.981173  
H 2.200080 -5.037434 0.678976  
C -3.419869 -4.679407 0.415506  
H -4.273896 -4.858268 1.077630  
H -2.762968 -5.552958 0.479372  
H -3.803772 -4.612475 -0.606264  
C 1.472110 -3.471504 2.919578  
H 2.269206 -4.185918 3.152292  
H 0.530271 -3.925621 3.238371  
H 1.636860 -2.572238 3.520914  
C -3.899066 1.027404 -2.714827  
H -3.563550 0.086758 -3.159470  
H -3.558958 1.844869 -3.359020  
H -4.994781 1.029168 -2.710612  
H 0.744904 2.318610 -0.411110  
H -0.946723 2.606116 0.246038  
Mg -0.257521 -0.184072 0.064711  
C 0.392264 1.550988 1.556754  
H 1.447409 1.299924 1.679813

ts6b.log

SCF (wB97x) = -1435.77842766  
E(SCF)+ZPE(0 K)= -1435.006071  
H(298 K)= -1434.964557  
G(298 K)= -1435.077367  
Lowest Frequency = -422.7056cm-1

N -1.708743 -1.086297 -0.793867  
N 1.240079 -1.338782 -0.742330  
C 0.983470 -2.037806 -1.844415  
C 2.512005 -1.470401 -0.110624  
C -2.971149 -0.984006 -0.140990  
C 3.586112 -0.631214 -0.460354  
C -1.548925 -1.844443 -1.865433  
C -3.373546 -1.996648 0.753092  
C 0.056213 2.121107 0.014370

C -3.752560 0.175922 -0.317259  
C 2.649814 -2.426334 0.920850  
C -3.342365 1.254061 -1.307861  
H -2.264759 1.159034 -1.470873  
C 3.438116 0.491589 -1.475131  
H 2.415685 0.456393 -1.865155  
C -0.292887 -2.173463 -2.418136  
H -0.334219 -2.750060 -3.335036  
C -2.739492 -2.470561 -2.563884  
H -2.694241 -3.559243 -2.467312  
H -2.698975 -2.238671 -3.632044  
H -3.691694 -2.125446 -2.160989  
C 3.898913 -2.578799 1.522162  
H 4.031054 -3.317741 2.305406  
C -0.236891 -0.000085 2.277143  
H 0.463765 -0.814647 2.497094  
H -1.224903 -0.427763 2.023003  
C -2.550626 -3.258992 0.968785  
H -1.636476 -3.176482 0.373363  
C 4.814829 -0.815867 0.177549  
H 5.654370 -0.180185 -0.090865  
C -4.944986 0.291629 0.397769  
H -5.564037 1.173477 0.264267  
C 1.461719 -3.265870 1.377701  
H 0.561475 -2.662405 1.216478  
C 2.115485 -2.756341 -2.549457  
H 2.768187 -2.026203 -3.036326  
H 1.738136 -3.442488 -3.308102  
H 2.733260 -3.313636 -1.841447  
C 4.981269 -1.792027 1.147237  
H 5.945863 -1.928794 1.626073  
C -4.574157 -1.834773 1.446344  
H -4.900086 -2.610686 2.133826  
C -5.358314 -0.703179 1.274305  
H -6.289397 -0.595402 1.821807  
C 4.405510 0.349482 -2.658399  
H 5.446258 0.445508 -2.330893  
H 4.218608 1.132492 -3.400126  
H 4.306722 -0.619542 -3.154754  
C -2.128689 -3.423981 2.433895  
H -1.517460 -2.582162 2.772627  
H -1.544331 -4.342347 2.553593  
H -2.997699 -3.498489 3.095993  
C 3.639019 1.855660 -0.797825  
H 2.992267 1.966483 0.076568  
H 3.417261 2.671121 -1.494098  
H 4.673997 1.975987 -0.459911  
C -3.605902 2.673507 -0.794100  
H -4.676065 2.903466 -0.756619  
H -3.140756 3.405736 -1.461552  
H -3.195272 2.819108 0.209544  
C 1.286858 -4.544168 0.545246  
H 1.071601 -4.319924 -0.502177  
H 0.450197 -5.135504 0.934080  
H 2.189768 -5.163271 0.588696  
C -3.310318 -4.504378 0.489378  
H -4.197038 -4.685931 1.106586  
H -2.671320 -5.391237 0.553276  
H -3.645118 -4.396321 -0.545622  
C 1.526701 -3.610494 2.869575  
H 2.314977 -4.339615 3.085258  
H 0.582026 -4.053859 3.193590  
H 1.710976 -2.721048 3.479742

C -4.028683 1.035592 -2.664167  
H -3.774236 0.060139 -3.086782  
H -3.721976 1.805486 -3.379760  
H -5.118148 1.083288 -2.557567  
H 0.918321 2.394235 -0.589868  
H -0.873506 2.624197 -0.242599  
C 0.270460 1.824870 1.389269  
H 1.311467 1.746399 1.711364  
Mg -0.140167 -0.051852 0.006670  
C -0.653462 2.234725 2.518485  
C -0.415345 1.016874 3.403854  
H 0.521289 1.134910 3.959959  
H -1.205844 0.791107 4.125937  
H -0.425429 3.227522 2.925549  
H -1.688592 2.245114 2.155375

ts6c.log

SCF (wB97x) = -1475.09603530  
E(SCF)+ZPE(0 K)= -1474.293875  
H(298 K)= -1474.251613  
G(298 K)= -1474.365288  
Lowest Frequency = -389.3269cm-1

N -1.660528 -1.003478 -0.752093  
N 1.275929 -1.344778 -0.772864  
C 0.975976 -2.054271 -1.852513  
C 2.546422 -1.472109 -0.139158  
C -2.894238 -0.805948 -0.068637  
C 3.578117 -0.555133 -0.415681  
C -1.551426 -1.796215 -1.805790  
C -3.342396 -1.764042 0.863616  
C 0.184718 2.114660 0.099743  
C -3.587806 0.412348 -0.240098  
C 2.720683 -2.479450 0.834430  
C -3.170557 1.401835 -1.318519  
H -2.097319 1.272763 -1.486322  
C 3.398189 0.568819 -1.422791  
H 2.335610 0.612217 -1.682150  
C -0.322603 -2.174498 -2.382205  
H -0.401289 -2.773652 -3.283315  
C -2.779446 -2.404636 -2.453649  
H -3.708267 -2.031478 -2.021189  
H -2.754533 -3.492340 -2.340840  
H -2.774471 -2.190399 -3.526251  
C 3.960578 -2.590777 1.463283  
H 4.117433 -3.373103 2.199751  
C 0.008508 -0.201491 2.303599  
H 0.993132 -0.208417 2.782714  
H -0.116750 -1.223216 1.893481  
C -2.654237 -3.110734 1.039931  
H -1.757486 -3.118837 0.413011  
C 4.800191 -0.703704 0.243041  
H 5.610405 -0.013996 0.023364  
C -4.709084 0.659604 0.551901  
H -5.251433 1.592291 0.433841  
C 1.598566 -3.447327 1.183852  
H 0.663660 -3.008978 0.818902  
C 2.055587 -2.801784 -2.612749  
H 2.275588 -2.258909 -3.538053  
H 1.709884 -3.798672 -2.895569  
H 2.980131 -2.893750 -2.042560  
C 4.999972 -1.718430 1.167552

H 5.959283 -1.824018 1.664567  
C -4.475672 -1.473441 1.625850  
H -4.832696 -2.203851 2.346747  
C -5.150572 -0.269912 1.485202  
H -6.023990 -0.058746 2.094131  
C 4.184094 0.292619 -2.712088  
H 5.259890 0.250363 -2.508560  
H 4.010731 1.084213 -3.448419  
H 3.893278 -0.661078 -3.159595  
C -2.205992 -3.360111 2.485260  
H -1.491319 -2.606369 2.823384  
H -1.727665 -4.342006 2.563542  
H -3.055370 -3.352580 3.176329  
C 3.792819 1.930604 -0.835851  
H 3.300679 2.108750 0.124858  
H 3.511299 2.737152 -1.520653  
H 4.873558 2.001029 -0.673147  
C -3.411817 2.867017 -0.940828  
H -4.478994 3.113254 -0.926205  
H -2.940561 3.522894 -1.679445  
H -2.996360 3.110923 0.040892  
C 1.780088 -4.792075 0.466206  
H 1.819812 -4.664687 -0.618536  
H 0.949404 -5.466877 0.698831  
H 2.710766 -5.276729 0.781778  
C -3.570175 -4.252056 0.570916  
H -4.446746 -4.340087 1.222138  
H -3.037146 -5.208081 0.597218  
H -3.931344 -4.087289 -0.447280  
C 1.455381 -3.657739 2.695416  
H 2.326774 -4.165246 3.121942  
H 0.582696 -4.282468 2.906153  
H 1.325056 -2.704767 3.216265  
C -3.877688 1.081316 -2.644477  
H -3.637969 0.074843 -2.993878  
H -3.574914 1.790156 -3.422206  
H -4.964810 1.148228 -2.525643  
H 1.135274 2.385827 -0.351726  
H -0.690985 2.591465 -0.335161  
C 0.160382 1.876664 1.500215  
H 1.115852 1.913255 2.020437  
Mg -0.049997 -0.046225 0.064738  
C -1.015063 2.318678 2.335416  
H -0.902526 3.397615 2.501466  
H -1.939010 2.174036 1.760631  
C -1.102638 1.555189 3.647747  
C -1.113763 0.070240 3.291405  
H -1.989248 1.847062 4.219635  
H -0.224554 1.786579 4.265801  
H -2.079332 -0.172387 2.827209  
H -1.041168 -0.544155 4.199600

ts6d.log

SCF (wB97x) = -1514.38973039  
E(SCF)+ZPE(0 K)= -1513.558337  
H(298 K)= -1513.514856  
G(298 K)= -1513.630996  
Lowest Frequency = -397.4794cm-1

N -1.708982 -0.985750 -0.809480  
N 1.227587 -1.316804 -0.708946  
C 0.972767 -2.028866 -1.797863

C 2.476824 -1.431705 -0.031205  
C -2.967218 -0.799326 -0.168957  
C 3.505815 -0.501594 -0.274334  
C -1.554353 -1.775644 -1.859885  
C -3.431273 -1.757100 0.756775  
C 0.091733 2.125672 0.141252  
C -3.671739 0.407287 -0.372155  
C 2.630713 -2.435327 0.949100  
C -3.227597 1.398533 -1.437949  
H -2.149066 1.272810 -1.572356  
C 3.346531 0.614605 -1.293880  
H 2.286051 0.669256 -1.559223  
C -0.302051 -2.149551 -2.383823  
H -0.340272 -2.750434 -3.286584  
C -2.753007 -2.384202 -2.560471  
H -3.699666 -2.025795 -2.154937  
H -2.722360 -3.473370 -2.465628  
H -2.712526 -2.151181 -3.628486  
C 3.849459 -2.528761 1.621093  
H 3.990501 -3.308078 2.364065  
C -0.123978 -0.221446 2.309441  
H 0.927521 -0.244770 2.627703  
H -0.297935 -1.217384 1.846973  
C -2.750637 -3.107610 0.935581  
H -1.832764 -3.106284 0.340004  
C 4.706110 -0.633139 0.426407  
H 5.514625 0.066255 0.233428  
C -4.819774 0.646155 0.383719  
H -5.370926 1.570155 0.240620  
C 1.513075 -3.420148 1.263611  
H 0.587918 -3.011855 0.843776  
C 2.076916 -2.792299 -2.505983  
H 2.276491 -2.314148 -3.470511  
H 1.760754 -3.817403 -2.713973  
H 3.004145 -2.816437 -1.933607  
C 4.886700 -1.643300 1.360102  
H 5.829333 -1.735016 1.890624  
C -4.584906 -1.471079 1.489209  
H -4.953594 -2.199935 2.205811  
C -5.271468 -0.277768 1.317461  
H -6.163108 -0.071687 1.901240  
C 4.133319 0.312094 -2.576857  
H 5.206381 0.245725 -2.365341  
H 3.983005 1.103309 -3.318687  
H 3.822425 -0.636523 -3.021248  
C -2.352949 -3.390535 2.388588  
H -1.647075 -2.648271 2.765687  
H -1.880872 -4.376013 2.460733  
H -3.224161 -3.394462 3.051972  
C 3.757071 1.979002 -0.724424  
H 3.276158 2.171322 0.239262  
H 3.474788 2.779829 -1.415489  
H 4.839820 2.044508 -0.573503  
C -3.486534 2.861533 -1.064175  
H -4.554309 3.104458 -1.089771  
H -2.989331 3.522420 -1.781044  
H -3.110561 3.097435 -0.065640  
C 1.762440 -4.775782 0.588178  
H 1.864942 -4.669968 -0.494766  
H 0.932946 -5.462830 0.786574  
H 2.682010 -5.234573 0.968350  
C -3.653936 -4.235751 0.412054  
H -4.552090 -4.332729 1.031885

H -3.125248 -5.194242 0.436843  
H -3.980351 -4.049248 -0.613974  
C 1.299525 -3.599946 2.771139  
H 2.160918 -4.075480 3.251512  
H 0.432215 -4.240977 2.953817  
H 1.122118 -2.638359 3.261249  
C -3.892010 1.077534 -2.785511  
H -3.638051 0.072778 -3.129375  
H -3.568565 1.789410 -3.552067  
H -4.982479 1.140240 -2.699758  
H 1.097654 2.374170 -0.185459  
H -0.715032 2.575243 -0.434038  
C -0.129150 1.921300 1.524593  
H 0.729478 2.012961 2.184845  
Mg -0.142047 -0.035718 0.092676  
C -1.462089 2.310043 2.129802  
H -1.706802 3.309250 1.747486  
H -2.244563 1.644778 1.747380  
C -1.045512 -0.158984 3.523325  
H -2.094821 -0.242871 3.203893  
H -0.868087 -1.019965 4.185523  
C -1.494910 2.348024 3.660732  
C -0.856695 1.124517 4.331803  
H 0.220130 1.289317 4.469446  
H -1.274577 1.009389 5.337953  
H -0.996786 3.259251 4.013518  
H -2.543327 2.431455 3.969612

ts7a.log

SCF (wB97x) = -1622.73806595  
E(SCF)+ZPE(0 K)= -1621.995251  
H(298 K)= -1621.954535  
G(298 K)= -1622.065250  
Lowest Frequency = -430.6110cm<sup>-1</sup>

N -1.768392 -1.140548 -0.865714  
N 1.185566 -1.352473 -0.754583  
C 0.966087 -2.053287 -1.852440  
C 2.431484 -1.384844 -0.069490  
C -3.041715 -1.076468 -0.236698  
C 3.462499 -0.494038 -0.420881  
C -1.564108 -1.868099 -1.952590  
C -3.456770 -2.132405 0.598504  
C 0.044150 1.861678 0.110035  
C -3.826046 0.085357 -0.378592  
C 2.575184 -2.263394 1.026936  
C -3.378587 1.223300 -1.281755  
H -2.300411 1.118901 -1.429305  
C 3.300645 0.521832 -1.540484  
H 2.258152 0.485740 -1.871209  
C -0.383317 1.354624 2.637922  
H 0.143142 1.529116 3.575075  
H -1.311785 1.923431 2.585862  
C -0.294954 -2.181533 -2.470347  
H -0.300208 -2.754718 -3.391284  
C -2.738029 -2.474832 -2.694176  
H -2.775745 -3.552778 -2.510195  
H -2.605574 -2.332263 -3.769753  
H -3.692080 -2.043111 -2.391074  
C 3.794773 -2.284154 1.702755  
H 3.932982 -2.960717 2.539441  
C -0.511191 -0.104348 2.193270

H 0.062170 -0.817236 2.780327  
H -1.556070 -0.387482 2.036958  
C -2.610130 -3.380715 0.802414  
H -1.698278 -3.275014 0.207489  
C 4.665289 -0.552851 0.287013  
H 5.476857 0.115767 0.013169  
C -5.044555 0.152486 0.297098  
H -5.668465 1.034313 0.186053  
C 1.425258 -3.163802 1.459829  
H 0.498613 -2.616335 1.256642  
C 2.095474 -2.801196 -2.534610  
H 2.316678 -2.317527 -3.491371  
H 1.792316 -3.828118 -2.752693  
H 3.006485 -2.820761 -1.936772  
C 4.840489 -1.447100 1.331498  
H 5.783747 -1.483781 1.867621  
C -4.681661 -2.017018 1.258235  
H -5.017241 -2.825515 1.902323  
C -5.475887 -0.889074 1.108819  
H -6.427169 -0.818674 1.627065  
C 4.196063 0.187666 -2.741993  
H 5.254631 0.240764 -2.464218  
H 4.027551 0.898742 -3.557278  
H 4.003596 -0.818705 -3.120936  
C -2.182649 -3.536811 2.267099  
H -1.605941 -2.672925 2.608846  
H -1.561951 -4.431535 2.385317  
H -3.050181 -3.645102 2.926829  
C 3.588976 1.948328 -1.050935  
H 3.013984 2.189940 -0.152767  
H 3.331983 2.676884 -1.826693  
H 4.649432 2.082330 -0.811958  
C -3.622970 2.602988 -0.661159  
H -4.689306 2.848403 -0.609370  
H -3.140299 3.377023 -1.266209  
H -3.215817 2.659549 0.353093  
C 1.369507 -4.462913 0.643836  
H 1.223270 -4.264831 -0.420100  
H 0.536044 -5.088151 0.983090  
H 2.295902 -5.035708 0.762238  
C -3.341539 -4.642548 0.323566  
H -4.219055 -4.850838 0.945414  
H -2.679803 -5.513055 0.379667  
H -3.686580 -4.539408 -0.708713  
C 1.451300 -3.483309 2.957903  
H 2.270049 -4.163573 3.216451  
H 0.520324 -3.975151 3.251550  
H 1.561938 -2.577260 3.561802  
C -4.045250 1.120493 -2.660839  
H -3.799091 0.174558 -3.151306  
H -3.711564 1.935107 -3.312028  
H -5.135783 1.180587 -2.571135  
H 0.861652 2.151203 -0.541388  
H -0.832139 2.504391 0.064454  
Zn -0.257803 -0.202275 -0.002514  
C 0.425026 1.386360 1.415266  
H 1.467058 1.096982 1.558417

ts7b.log

SCF (wB97x) = -1662.03516928  
E(SCF)+ZPE(0 K)= -1661.262455  
H(298 K)= -1661.220827

G(298 K)= -1661.333636  
Lowest Frequency = -412.5868cm<sup>-1</sup>

N -1.667907 -1.023006 -0.767034  
N 1.270667 -1.347740 -0.730660  
C 0.991234 -2.042012 -1.828040  
C 2.541763 -1.491817 -0.102480  
C -2.907784 -0.881533 -0.080121  
C 3.614298 -0.653530 -0.455207  
C -1.533683 -1.783818 -1.837136  
C -3.265759 -1.843051 0.889178  
C 0.041693 1.992811 -0.094903  
C -3.710276 0.256038 -0.298181  
C 2.684762 -2.461175 0.914410  
C -3.368870 1.275218 -1.373707  
H -2.319579 1.127580 -1.643865  
C 3.449920 0.489551 -1.443733  
H 2.425089 0.456547 -1.825602  
C -0.289391 -2.147190 -2.395990  
H -0.349390 -2.720691 -3.313550  
C -2.747537 -2.338369 -2.555186  
H -2.644627 -3.416287 -2.701937  
H -2.808641 -1.881215 -3.548146  
H -3.677107 -2.137817 -2.022250  
C 3.941194 -2.630264 1.495814  
H 4.077805 -3.379908 2.268234  
C -0.126453 -0.197249 2.200528  
H 0.797746 -0.706446 2.482284  
H -0.883572 -0.940749 1.925398  
C -2.437669 -3.101757 1.112455  
H -1.468973 -2.953559 0.625638  
C 4.850593 -0.854777 0.162305  
H 5.690034 -0.219670 -0.107853  
C -4.871870 0.407622 0.460450  
H -5.505381 1.274181 0.296034  
C 1.493957 -3.289780 1.382112  
H 0.603528 -2.673221 1.230671  
C 2.108563 -2.782521 -2.532712  
H 2.794493 -2.064294 -2.991132  
H 1.718162 -3.436866 -3.312518  
H 2.696492 -3.378177 -1.830645  
C 5.023745 -1.846336 1.115469  
H 5.994134 -1.996406 1.578462  
C -4.438447 -1.647474 1.619736  
H -4.733500 -2.384238 2.361088  
C -5.237639 -0.531635 1.414658  
H -6.145655 -0.396359 1.993957  
C 4.407853 0.383656 -2.637658  
H 5.452025 0.469767 -2.318268  
H 4.213728 1.187998 -3.354335  
H 4.302476 -0.570117 -3.162044  
C -2.172171 -3.394456 2.593826  
H -1.662516 -2.562669 3.088467  
H -1.539862 -4.283476 2.684953  
H -3.097763 -3.600306 3.141137  
C 3.641420 1.835782 -0.729483  
H 2.996700 1.910426 0.150632  
H 3.406772 2.668565 -1.400765  
H 4.676681 1.957466 -0.392495  
C -3.535626 2.723664 -0.896514  
H -4.590255 2.986726 -0.761838  
H -3.122065 3.413753 -1.638820  
H -3.024100 2.900217 0.053673

C 1.295666 -4.568214 0.555752  
H 1.064445 -4.344886 -0.488411  
H 0.460109 -5.151007 0.959767  
H 2.193114 -5.196147 0.585790  
C -3.108129 -4.316841 0.453889  
H -4.071705 -4.530241 0.929981  
H -2.476002 -5.205425 0.553568  
H -3.293358 -4.148134 -0.609026  
C 1.566923 -3.630414 2.874504  
H 2.347986 -4.367967 3.088399  
H 0.618643 -4.061097 3.206094  
H 1.763710 -2.740607 3.479783  
C -4.215260 1.039385 -2.633769  
H -4.075931 0.030560 -3.028822  
H -3.944561 1.753252 -3.418673  
H -5.280625 1.166931 -2.411446  
H 0.935314 2.383547 -0.571588  
H -0.893706 2.417963 -0.445990  
C 0.115975 1.682035 1.308962  
H 1.105004 1.760012 1.762460  
Zn -0.059367 -0.053019 -0.060788  
C -1.008099 1.930278 2.294795  
C -0.689670 0.776925 3.241069  
H 0.085262 1.071196 3.956920  
H -1.543065 0.396180 3.809830  
H -1.010092 2.950862 2.698462  
H -1.970719 1.755626 1.799751

ts7c.log

SCF (wB97x) = -1701.35299207  
E(SCF)+ZPE(0 K)= -1700.550339  
H(298 K)= -1700.508099  
G(298 K)= -1700.621334  
Lowest Frequency = -410.0806cm-1

N -1.676662 -0.974554 -0.728569  
N 1.268255 -1.321395 -0.740878  
C 0.968116 -2.020244 -1.823964  
C 2.529411 -1.449892 -0.091057  
C -2.908359 -0.785685 -0.040433  
C 3.565115 -0.536311 -0.362133  
C -1.557854 -1.748416 -1.793152  
C -3.329869 -1.740957 0.907165  
C 0.171416 1.983765 -0.063914  
C -3.634713 0.408376 -0.234492  
C 2.696125 -2.460802 0.879208  
C -3.247412 1.394710 -1.326283  
H -2.191559 1.230473 -1.556906  
C 3.404891 0.570358 -1.390925  
H 2.352009 0.596381 -1.685683  
C -0.326615 -2.120662 -2.367501  
H -0.401952 -2.707034 -3.277062  
C -2.784642 -2.321670 -2.473901  
H -3.712384 -2.021661 -1.986200  
H -2.729596 -3.413401 -2.488279  
H -2.808433 -1.985198 -3.514907  
C 3.926319 -2.564311 1.528538  
H 4.076685 -3.347928 2.264998  
C 0.002092 -0.305936 2.205749  
H 1.012010 -0.327240 2.624993  
H -0.190945 -1.317685 1.821764  
C -2.606455 -3.067408 1.096593

H -1.668140 -3.022197 0.535332  
C 4.776693 -0.677225 0.316957  
H 5.588949 0.012283 0.104032  
C -4.766396 0.635075 0.548904  
H -5.336456 1.548672 0.410625  
C 1.583847 -3.450056 1.197212  
H 0.650733 -3.027615 0.811813  
C 2.048606 -2.771855 -2.577330  
H 2.273821 -2.228331 -3.501049  
H 1.700452 -3.767415 -2.861701  
H 2.970480 -2.866190 -2.003346  
C 4.964748 -1.685228 1.251160  
H 5.915822 -1.784125 1.765141  
C -4.475420 -1.472212 1.658770  
H -4.816797 -2.201755 2.387687  
C -5.185036 -0.291445 1.495087  
H -6.068478 -0.097425 2.095307  
C 4.238858 0.284022 -2.647629  
H 5.308055 0.261392 -2.409003  
H 4.078374 1.060166 -3.403113  
H 3.976923 -0.681456 -3.088147  
C -2.255584 -3.356538 2.560940  
H -1.601300 -2.589781 2.980910  
H -1.741516 -4.320161 2.635706  
H -3.151556 -3.417081 3.187324  
C 3.765554 1.944352 -0.810662  
H 3.234594 2.133102 0.127070  
H 3.505098 2.738170 -1.518426  
H 4.838537 2.025964 -0.606448  
C -3.417258 2.861781 -0.915392  
H -4.472674 3.140051 -0.824151  
H -2.976711 3.514549 -1.675650  
H -2.929918 3.078414 0.039030  
C 1.810640 -4.787349 0.478130  
H 1.877994 -4.653738 -0.604395  
H 0.987018 -5.479091 0.684574  
H 2.741459 -5.255862 0.816855  
C -3.444491 -4.222629 0.526377  
H -4.369038 -4.348362 1.100809  
H -2.886993 -5.163702 0.576067  
H -3.724271 -4.044214 -0.514302  
C 1.408800 -3.674630 2.703318  
H 2.279691 -4.168875 3.146159  
H 0.544117 -4.318202 2.888648  
H 1.248034 -2.729179 3.228744  
C -4.050109 1.118024 -2.607029  
H -3.889784 0.100433 -2.969754  
H -3.756786 1.811618 -3.401979  
H -5.123003 1.244023 -2.423300  
H 1.106291 2.271682 -0.533160  
H -0.706571 2.501399 -0.440159  
C 0.201472 1.733698 1.355149  
H 1.185350 1.744858 1.821315  
Zn -0.069502 -0.041311 -0.002288  
C -0.904544 2.259760 2.233603  
H -0.723824 3.335219 2.357128  
H -1.861369 2.147938 1.708851  
C -0.960965 1.534622 3.567239  
C -1.055973 0.048482 3.235442  
H -1.805439 1.876090 4.173734  
H -0.044045 1.737113 4.136843  
H -2.051793 -0.157994 2.822310  
H -0.961826 -0.558419 4.146582

```

ts7d.log

SCF (wB97x) = -1740.64545249
E(SCF)+ZPE(0 K)= -1739.813507
H(298 K)= -1739.770003
G(298 K)= -1739.886216
Lowest Frequency = -430.6401cm-1

N -1.730242 -0.958277 -0.777971
N 1.215806 -1.301455 -0.663591
C 0.960853 -1.992939 -1.762666
C 2.456169 -1.425886 0.026977
C -2.988841 -0.779034 -0.137470
C 3.491654 -0.501033 -0.205194
C -1.564035 -1.716009 -1.847996
C -3.414856 -1.724397 0.819723
C 0.061100 1.992136 -0.033965
C -3.738912 0.390107 -0.381608
C 2.602017 -2.441919 0.994592
C -3.340188 1.371096 -1.474141
H -2.283665 1.198847 -1.698252
C 3.354459 0.609427 -1.233370
H 2.307717 0.639261 -1.548393
C -0.308275 -2.085845 -2.366041
H -0.340999 -2.663513 -3.283775
C -2.759124 -2.262385 -2.603123
H -3.705510 -2.015016 -2.121551
H -2.681858 -3.348330 -2.698931
H -2.761883 -1.847527 -3.615952
C 3.811717 -2.538261 1.682657
H 3.945225 -3.325838 2.418332
C -0.100667 -0.314928 2.226054
H 0.959779 -0.336203 2.502431
H -0.322287 -1.310315 1.807904
C -2.678089 -3.040800 1.028282
H -1.701465 -2.956839 0.541830
C 4.682207 -0.635439 0.511093
H 5.494405 0.062661 0.328429
C -4.899667 0.604867 0.362793
H -5.488945 1.499323 0.184457
C 1.491819 -3.444944 1.272783
H 0.572145 -3.045572 0.835074
C 2.066749 -2.752868 -2.470081
H 2.293049 -2.246269 -3.414122
H 1.739172 -3.765806 -2.715842
H 2.982176 -2.807694 -1.881216
C 4.849874 -1.647726 1.444761
H 5.784860 -1.740954 1.988439
C -4.583490 -1.464295 1.536892
H -4.928213 -2.184466 2.273203

C -5.318166 -0.306150 1.323227
H -6.221892 -0.119829 1.895058
C 4.210574 0.323145 -2.475125
H 5.274529 0.289730 -2.215202
H 4.071574 1.105034 -3.228966
H 3.948709 -0.637189 -2.926756
C -2.433495 -3.378711 2.502386
H -1.846925 -2.606950 3.003171
H -1.887792 -4.324499 2.578699
H -3.371734 -3.502837 3.053024
C 3.707636 1.981475 -0.643996
H 3.166303 2.166368 0.288665
H 3.454468 2.777288 -1.352156
H 4.778144 2.064075 -0.427600
C -3.503616 2.838632 -1.061175
H -4.558622 3.122822 -0.984078
H -3.047908 3.491620 -1.812318
H -3.030670 3.043613 -0.098453
C 1.778545 -4.789216 0.589256
H 1.905861 -4.669864 -0.489664
H 0.955075 -5.490858 0.759605
H 2.695479 -5.238425 0.986866
C -3.443727 -4.191735 0.356115
H -4.412409 -4.344216 0.845116
H -2.876963 -5.125700 0.429945
H -3.634806 -3.990269 -0.699877
C 1.245331 -3.645790 2.772472
H 2.102003 -4.115188 3.267145
H 0.383622 -4.301494 2.927264
H 1.043009 -2.693382 3.270218
C -4.141552 1.105068 -2.757958
H -3.999731 0.084628 -3.119300
H -3.834001 1.793141 -3.552341
H -5.212629 1.250658 -2.578203
H 1.047719 2.273832 -0.385944
H -0.766711 2.466504 -0.553716
C -0.100146 1.790145 1.379576
H 0.796024 1.884254 1.988106
Zn -0.159771 -0.033633 0.034205
C -1.383534 2.255935 2.035195
H -1.600311 3.249795 1.623796
H -2.211182 1.613809 1.714745
C -0.979410 -0.160691 3.463113
H -2.041452 -0.211384 3.183133
H -0.809693 -1.014009 4.136963
C -1.334756 2.355390 3.562101
C -0.710035 1.128563 4.237316
H 0.376789 1.257281 4.325520
H -1.088422 1.047755 5.262012
H -0.783202 3.257452 3.853064
H -2.361082 2.492671 3.921356

```

## 5. References

- 1 S. P. Green, C. Jones and A. Stasch, *Angew. Chem., Int. Ed.*, 2008, **47**, 9079–9083.
- 2 J. Spielmann, D. Piesik, B. Wittkamp, G. Jansen and S. Harder, *Chem. Commun.*, 2009, **23**, 3455–3456.
- 3 R. Y. Kong and M. R. Crimmin, *J. Am. Chem. Soc.*, 2020, **142**, 11967–11971.
- 4 L. Garcia, C. Dinoi, M. F. Mahon, L. Maron and M. S. Hill, *Chem. Sci.*, 2019, **10**, 8108–8118.
- 5 R. D. Holmes-Smith, S. R. Stobart, J. L. Atwood and W. E. Hunter, *J. Chem. Soc., Dalton Trans.*, 1982, 2461–2468.
- 6 B. A. Shainyan and E. Kleinpeter, *Tetrahedron*, 2012, **68**, 114–125.
- 7 O. V. Dolomanov, L. J. Bourhis, R. J. Gildea, J. A. K. Howard and H. Puschmann, *J. Appl. Cryst.*, 2009, **42**, 339–341.
- 8 G. M. Sheldrick, SHELXTL v5.1 Bruker AXS: Madison WI., 1998.
- 9 G. M. Sheldrick, *Acta Cryst., C* 2015, **71**, 3–8.
- 10 M. J. Frisch, G. W. Trucks, H. B. Schlegel, G. E. Scuseria, M. A. Robb, J. R. Cheeseman, G. Scalmani, V. Barone, B. Mennucci and G. A. Peterson, Gaussian 09; Revision D.01, Gaussian Inc. 2009.
- 11 J. Da Chai and M. Head-Gordon, *Phys. Chem. Chem. Phys.*, 2008, **10**, 6615–6620.
- 12 W. J. Hehre, R. Ditchfield and J. A. Pople, *J. Chem. Phys.*, 1972, **56**, 2257–2261.
- 13 P. C. Hariharan and J. A. Pople, *Theor. Chim. Acta*, 1973, **28**, 213–222.
- 14 T. Clark, J. Chandrasekar, W. Spitznagel, Gunther and P. von R. Schleyer, *J. Comput. Chem.*, 1983, **4**, 294–301.
- 15 M. Garçon, C. Bakewell, G. A. Sackman, A. J. P. White, R. I. Cooper, A. J. Edwards and M. R. Crimmin, *Nature*, 2019, **574**, 390–393.
- 16 M. Garçon, N. W. Mun, A. J. P. White and M. R. Crimmin, *Angew. Chem., Int. Ed.*, 2021, **60**, 6145–6153.
- 17 M. J. Butler, A. J. P. White and M. R. Crimmin, *Angew. Chem., Int. Ed.*, 2016, **55**, 6951–6953.
- 18 A. Hicken, A. J. P. White and M. R. Crimmin, *Angew. Chem., Int. Ed.*, 2017, **56**, 15127–15130.
- 19 J. Tomasi, B. Mennucci and R. Cammi, *Chem. Rev.*, 2005, **105**, 2999–3093.

- 20 K. Fukui, *Acc. Chem. Res.*, 1981, **14**, 363–368.
- 21 H. P. Hratchian and H. B. Schlegel, *Chapter 10 - Finding minima, transition states, and following reaction pathways on ab initio potential energy surfaces. Theory and Applications of Computational Chemistry – The First Forty Years*, 2005, **Ch. 10** 195–249.
- 22 R. Dennington, T. Keith and J. Milliam, GaussView 5.0, Semichem Inc., Shawnee Mission, KS., 2009.
- 23 M. Ernzerhof and G. E. Scuseria, *J. Chem. Phys.*, 1999, **110**, 5029–5036.
- 24 C. Adamo and V. Barone, *J. Chem. Phys.*, 1999, **110**, 6158–6170.
- 25 J. P. Perdew, K. Burke and M. Ernzerhof, *Phys. Rev. Lett.*, 1996, **77**, 3865–3868.
- 26 S. Grimme, S. Ehrlich and L. Goerigk, *J. Comput. Chem.*, 2011, **32**, 1456–1465.
- 27 E. D. Glendening, J. K. Badenhoop, A. E. Reed, J. E. Carpenter, J. A. Bohmann, C. M. Morales, C. R. Landis and F. Weinhold, NBO 6.0., 2013.
- 28 F. Weinhold and C. R. Landis, *Chem. Educ. Res. Pr.*, 2001, **2**, 91–104.
- 29 T. A. Keith, AIMALL (Version 19.10.12). TK Gristmill Software, Overland Park KS, USA., 2019.
- 30 F. Cortés-Guzmán and R. F. W. Bader, *Coord. Chem. Rev.*, 2005, **249**, 633–662.
- 31 D. Svatunek and K. N. Houk, *J. Comput. Chem.*, 2019, **40**, 2509–2515.
- 32 E. R. Johnson, S. Keinan, P. Mori-Sánchez, J. Contreras-García, A. J. Cohen and W. Yang, *J. Am. Chem. Soc.*, 2010, **132**, 6498–6506.
